# Supplementary material for: Global extracellular vesicle proteomic signature defines U87-MG glioma cell hypoxic status with potential implications for non-invasive diagnostics
Source: J Neurooncol. 2019 Aug 14;144(3):477–88. doi: 10.1007/s11060-019-03262-4 (PMC6764937; doi:10.1007/s11060-019-03262-4)
Supplement: Supplementary file 4 — Supplementary file4 (XLSX 15 kb) [file 11060_2019_3262_MOESM4_ESM.xlsx]

## Sheet: Sheet1
	Supplementary Table 8. Peak normalized area of peptides as determined by scheduled parallel reaction monitoring (PRM) run and Skyline version 3.1.
	UniProt No.	Description	Peptides	Normalized peak area
				Hypoxia (H)	Normoxia (N)
	P17936	Insulin-like growth factor-binding protein 3	ALAQCAPPPAVCAELVR - 911.9688++	0.606178	0.0148584
			EPGCGCCLTCALSEGQPCGIYTER - 925.7148+++	0.770357	0.0080804
			YGQPLPGYTTK - 612.8166++	0.564243	0.0264132
				0.646926	0.0164507
	O75531	Barrier-to-autointegration factor	AYVVLGQFLVLK - 675.4132++	0.650837	0.437377
	P13726	Tissue factor	DLIYTLYYWK - 689.3581++	0.59246	0.186567
			VNVTVEDER	0.610053	0.203556
				0.601256	0.195062
	Q16790	Carbonic anhydrase 9	VIEASFPAGVDSSPR - 766.3912++	0.634541	0.283393
			QLHTLSDTLWGPGDSR - 594.9638+++	0.56524	0.233119
				0.59989	0.258256
	Q9NRY6	Phospholipid scramblase 3	VETFLGWETCNR - 756.3510++	0.690992	0.472992
	P13473	Lysosome-associated membrane glycoprotein 2	IPLNDLFR - 494.2847++	0.531698	0.219239
	P61769	Beta-2-microglobulin	VEHSDLSFSK - 574.7828++	0.417354	0.226049
			VNHVTLSQPK - 561.8169++	0.377744	0.161508
				0.397549	0.193778
	P08758	Annexin A5	QEISAAFK - 447.2400++	0.549795	0.514251
			LYDAYELK - 507.7608++	0.602202	0.524343
			VLTEIIASR - 501.3031++	0.602522	0.534525
			QVYEEEYGSSLEDDVVGDTSGYYQR - 963.4175+++	0.689759	0.638798
			FITIFGTR - 477.7740++	0.466507	0.431852
				0.582157	0.528754
	P10451-5	Isoform 5 of Osteopontin	QNLLAPQTLPSK - 655.3774++	0.52574	0.355534
			GDSVVYGLR - 483.2562++	0.46549	0.347701
			AIPVAQDLNAPSDWDSR - 927.9527++	0.565704	0.334364
				0.518978	0.345866
	Q9H444	Charged multivesicular body protein 4b	QLAQIDGTLSTIEFQR - 607.3231+++	0.627943	0.422626
			EALENANTNTEVLK - 773.3914++	0.618107	0.420721
				0.623025	0.421674
	P19338	Nucleolin	ALELTGLK - 422.7606++	0.485821	0.278791
			EVFEDAAEIR - 589.7880++	0.486077	0.308095
			SISLYYTGEK - 580.7953++	0.559471	0.361421
				0.510456	0.316102
	P53985	Monocarboxylate transporter 1	DLHDANTDLIGR - 447.2249+++	0.685292	0.435191
			FSSAVGLVTIVECCPVLLGPPLLGR - 885.4851+++	0.717915	0.453694
				0.701603	0.444443
	P11166	Solute carrier family 2, facilitated glucose transporter member 1	VTILELFR - 495.8028++	0.76324	0.42076
			TFDEIASGFR - 571.7775++	0.838925	0.346848
				0.801083	0.383804
	Q99816	Tumor susceptibility gene 101 protein	DGTISEDTIR - 553.7698++	0.676584	0.581959
	O00264	Membrane-associated progesterone receptor component 1	FYGPEGPYGVFAGR - 758.8646++	0.629267	0.485807
	P14625	Endoplasmin	SGTSEFLNK - 491.7456++	0.664113	0.480345
			EVEEDEYK - 520.7246++	0.636912	0.514953
			SILFVPTSAPR - 594.3428++	0.729277	0.627785
			FQSSHHPTDITSLDQYVER - 754.0258+++	0.647275	0.46189
			SGYLLPDTK - 497.2662++	0.627778	0.466059
				0.661071	0.510206
	P01137	Transforming growth factor-beta-induced protein ig-h3	STVISYECCPGYEK - 846.8658++	0.532551	0.4923
			QAGLGNHLSGSER - 442.5567+++	0.535756	0.521223
			EGVYTVFAPTNEAFR - 850.9176++	0.714581	0.614991
			GDELADSALEIFK - 704.3537++	0.723955	0.649174
				0.626711	0.569422
