# Supplementary material for: Global extracellular vesicle proteomic signature defines U87-MG glioma cell hypoxic status with potential implications for non-invasive diagnostics
Source: J Neurooncol. 2019 Aug 14;144(3):477–88. doi: 10.1007/s11060-019-03262-4 (PMC6764937; doi:10.1007/s11060-019-03262-4)
Supplement: Supplementary file 5 — Supplementary file5 (XLSX 236 kb) [file 11060_2019_3262_MOESM5_ESM.xlsx]

## Sheet: Sheet1
	Supplementary Table 1. Protein identities in EVs isolated from normoxic U87 glioblastoma cells as determined by NG LC-MS/MS
	No.	Accession	Description	ΣCoverage	Σ# Proteins	Σ# Unique Peptides	Σ# Peptides	Σ# PSMs	# AAs	MW [kDa]	calc. pI
	1	P60660	Myosin light polypeptide 6 OS=Homo sapiens GN=MYL6 PE=1 SV=2 - [MYL6_HUMAN]	96.03	3	5	15	102	151	16.9191	4.65283
	2	P09382	Galectin-1 OS=Homo sapiens GN=LGALS1 PE=1 SV=2 - [LEG1_HUMAN]	94.81	1	7	13	168	135	14.7062	5.50342
	3	P60709	Actin, cytoplasmic 1 OS=Homo sapiens GN=ACTB PE=1 SV=1 - [ACTB_HUMAN]	92	11	6	28	532	375	41.7097	5.47803
	4	Q15185	Prostaglandin E synthase 3 OS=Homo sapiens GN=PTGES3 PE=1 SV=1 - [TEBP_HUMAN]	91.88	1	4	10	40	160	18.6854	4.53857
	5	P15531	Nucleoside diphosphate kinase A OS=Homo sapiens GN=NME1 PE=1 SV=1 - [NDKA_HUMAN]	91.45	2	1	14	69	152	17.1377	6.18896
	6	P63220	40S ribosomal protein S21 OS=Homo sapiens GN=RPS21 PE=1 SV=1 - [RS21_HUMAN]	90.36	1	1	6	14	83	9.10557	8.49951
	7	A8MS94	Putative golgin subfamily A member 2-like protein 5 OS=Homo sapiens PE=5 SV=2 - [GG2L5_HUMAN]	90	1	1	4	52	110	12.037	5.68115
	8	P49773	Histidine triad nucleotide-binding protein 1 OS=Homo sapiens GN=HINT1 PE=1 SV=2 - [HINT1_HUMAN]	88.89	1	4	10	22	126	13.7931	6.94678
	9	P62328	Thymosin beta-4 OS=Homo sapiens GN=TMSB4X PE=1 SV=2 - [TYB4_HUMAN]	88.64	2	3	6	35	44	5.04952	5.05908
	10	Q15286	Ras-related protein Rab-35 OS=Homo sapiens GN=RAB35 PE=1 SV=1 - [RAB35_HUMAN]	87.56	20	6	17	118	201	23.0108	8.29443
	11	P60174	Triosephosphate isomerase OS=Homo sapiens GN=TPI1 PE=1 SV=3 - [TPIS_HUMAN]	87.41	3	15	21	203	286	30.7717	5.92236
	12	P63027	Vesicle-associated membrane protein 2 OS=Homo sapiens GN=VAMP2 PE=1 SV=3 - [VAMP2_HUMAN]	87.07	2	2	7	29	116	12.6547	8.1333
	13	P18085	ADP-ribosylation factor 4 OS=Homo sapiens GN=ARF4 PE=1 SV=3 - [ARF4_HUMAN]	86.67	1	3	14	98	180	20.4977	7.13721
	14	P37802	Transgelin-2 OS=Homo sapiens GN=TAGLN2 PE=1 SV=3 - [TAGL2_HUMAN]	85.93	1	9	16	134	199	22.3772	8.25049
	15	P62158	Calmodulin OS=Homo sapiens GN=CALM1 PE=1 SV=2 - [CALM_HUMAN]	85.91	1	4	9	97	149	16.8268	4.22119
	16	P04080	Cystatin-B OS=Homo sapiens GN=CSTB PE=1 SV=2 - [CYTB_HUMAN]	85.71	1	3	7	35	98	11.1326	7.56201
	17	P62937	Peptidyl-prolyl cis-trans isomerase A OS=Homo sapiens GN=PPIA PE=1 SV=2 - [PPIA_HUMAN]	85.45	4	5	15	136	165	18.0009	7.81104
	18	P61224	Ras-related protein Rap-1b OS=Homo sapiens GN=RAP1B PE=1 SV=1 - [RAP1B_HUMAN]	85.33	6	10	15	169	184	20.8116	5.78271
	19	P52434	DNA-directed RNA polymerases I, II, and III subunit RPABC3 OS=Homo sapiens GN=POLR2H PE=1 SV=4 - [RPAB3_HUMAN]	85.33	1	1	9	14	150	17.1324	4.67822
	20	Q9XRX5-2	Isoform 2 of HERV-H LTR-associating protein 3 OS=Homo sapiens GN=HHLA3 - [HHLA3_HUMAN]	85.12	1	1	8	29	121	13.5019	9.37842
	21	P10599	Thioredoxin OS=Homo sapiens GN=TXN PE=1 SV=3 - [THIO_HUMAN]	84.76	2	4	7	47	105	11.7297	4.91943
	22	P09936	Ubiquitin carboxyl-terminal hydrolase isozyme L1 OS=Homo sapiens GN=UCHL1 PE=1 SV=2 - [UCHL1_HUMAN]	84.75	1	6	17	75	223	24.8085	5.47803
	23	P00558	Phosphoglycerate kinase 1 OS=Homo sapiens GN=PGK1 PE=1 SV=3 - [PGK1_HUMAN]	84.41	2	16	31	240	417	44.5861	8.104
	24	Q9P1U0	DNA-directed RNA polymerase I subunit RPA12 OS=Homo sapiens GN=ZNRD1 PE=1 SV=1 - [RPA12_HUMAN]	84.13	1	1	6	27	126	13.8943	5.05908
	25	Q9H0U4	Ras-related protein Rab-1B OS=Homo sapiens GN=RAB1B PE=1 SV=1 - [RAB1B_HUMAN]	84.08	22	6	15	134	201	22.1572	5.73193
	26	P81277	Prolactin-releasing peptide OS=Homo sapiens GN=PRLH PE=2 SV=1 - [PRRP_HUMAN]	83.91	1	1	7	8	87	9.63314	11.6636
	27	P80723	Brain acid soluble protein 1 OS=Homo sapiens GN=BASP1 PE=1 SV=2 - [BASP1_HUMAN]	83.7	2	17	17	299	227	22.68	4.62744
	28	P07737	Profilin-1 OS=Homo sapiens GN=PFN1 PE=1 SV=2 - [PROF1_HUMAN]	83.57	1	6	11	77	140	15.0446	8.26514
	29	P04632	Calpain small subunit 1 OS=Homo sapiens GN=CAPNS1 PE=1 SV=1 - [CPNS1_HUMAN]	83.21	2	5	15	70	268	28.2977	5.19873
	30	P49721	Proteasome subunit beta type-2 OS=Homo sapiens GN=PSMB2 PE=1 SV=1 - [PSB2_HUMAN]	82.59	1	1	12	19	201	22.8217	7.02002
	31	Q9UBQ5	Eukaryotic translation initiation factor 3 subunit K OS=Homo sapiens GN=EIF3K PE=1 SV=1 - [EIF3K_HUMAN]	82.57	1	1	13	33	218	25.0434	4.93213
	32	P15121	Aldose reductase OS=Homo sapiens GN=AKR1B1 PE=1 SV=3 - [ALDR_HUMAN]	82.28	3	13	21	172	316	35.8305	6.97607
	33	Q9BV86	N-terminal Xaa-Pro-Lys N-methyltransferase 1 OS=Homo sapiens GN=NTMT1 PE=1 SV=3 - [NTM1A_HUMAN]	82.06	2	1	11	15	223	25.3708	5.51611
	34	P00441	Superoxide dismutase [Cu-Zn] OS=Homo sapiens GN=SOD1 PE=1 SV=2 - [SODC_HUMAN]	81.82	1	2	8	20	154	15.9259	6.12549
	35	O14908	PDZ domain-containing protein GIPC1 OS=Homo sapiens GN=GIPC1 PE=1 SV=2 - [GIPC1_HUMAN]	81.68	3	7	22	71	333	36.0267	6.27783
	36	P22392-2	Isoform 3 of Nucleoside diphosphate kinase B OS=Homo sapiens GN=NME2 - [NDKB_HUMAN]	81.65	3	4	18	108	267	30.1176	8.92432
	37	P04406	Glyceraldehyde-3-phosphate dehydrogenase OS=Homo sapiens GN=GAPDH PE=1 SV=3 - [G3P_HUMAN]	81.49	2	10	26	278	335	36.0304	8.45557
	38	O60888-3	Isoform C of Protein CutA OS=Homo sapiens GN=CUTA - [CUTA_HUMAN]	81.41	3	2	9	18	156	16.8219	5.21143
	39	P07237	Protein disulfide-isomerase OS=Homo sapiens GN=P4HB PE=1 SV=3 - [PDIA1_HUMAN]	81.3	1	19	40	211	508	57.0807	4.86865
	40	P31942-2	Isoform 2 of Heterogeneous nuclear ribonucleoprotein H3 OS=Homo sapiens GN=HNRNPH3 - [HNRH3_HUMAN]	81.27	3	1	20	56	331	35.2164	6.87354
	41	P84077	ADP-ribosylation factor 1 OS=Homo sapiens GN=ARF1 PE=1 SV=2 - [ARF1_HUMAN]	81.22	3	2	12	75	181	20.6837	6.80029
	42	Q9BUF5	Tubulin beta-6 chain OS=Homo sapiens GN=TUBB6 PE=1 SV=1 - [TBB6_HUMAN]	81.17	1	3	30	143	446	49.825	4.88135
	43	P09972	Fructose-bisphosphate aldolase C OS=Homo sapiens GN=ALDOC PE=1 SV=2 - [ALDOC_HUMAN]	81.04	1	3	23	71	364	39.4312	6.87354
	44	P54920	Alpha-soluble NSF attachment protein OS=Homo sapiens GN=NAPA PE=1 SV=3 - [SNAA_HUMAN]	80.68	1	5	23	75	295	33.2113	5.36377
	45	P26641	Elongation factor 1-gamma OS=Homo sapiens GN=EEF1G PE=1 SV=3 - [EF1G_HUMAN]	80.32	1	16	30	164	437	50.0871	6.66846
	46	P07355-2	Isoform 2 of Annexin A2 OS=Homo sapiens GN=ANXA2 - [ANXA2_HUMAN]	80.11	3	25	33	589	357	40.3857	8.36768
	47	Q9UJZ1	Stomatin-like protein 2, mitochondrial OS=Homo sapiens GN=STOML2 PE=1 SV=1 - [STML2_HUMAN]	80.06	1	2	23	52	356	38.5102	7.38623
	48	Q99497	Protein DJ-1 OS=Homo sapiens GN=PARK7 PE=1 SV=2 - [PARK7_HUMAN]	79.89	1	5	12	52	189	19.8785	6.78564
	49	P01111	GTPase NRas OS=Homo sapiens GN=NRAS PE=1 SV=1 - [RASN_HUMAN]	79.89	1	3	13	69	189	21.2155	5.17334
	50	O43707	Alpha-actinin-4 OS=Homo sapiens GN=ACTN4 PE=1 SV=2 - [ACTN4_HUMAN]	79.36	6	20	63	372	911	104.788	5.43994
	51	P08670	Vimentin OS=Homo sapiens GN=VIM PE=1 SV=4 - [VIME_HUMAN]	78.97	28	28	42	451	466	53.6191	5.12256
	52	P26998	Beta-crystallin B3 OS=Homo sapiens GN=CRYBB3 PE=1 SV=4 - [CRBB3_HUMAN]	78.67	1	1	13	51	211	24.2369	6.72705
	53	P06733	Alpha-enolase OS=Homo sapiens GN=ENO1 PE=1 SV=2 - [ENOA_HUMAN]	78.57	5	19	36	413	434	47.1393	7.38623
	54	P0CG48	Polyubiquitin-C OS=Homo sapiens GN=UBC PE=1 SV=3 - [UBC_HUMAN]	78.54	4	5	7	150	685	76.9915	7.66455
	55	P68371	Tubulin beta-4B chain OS=Homo sapiens GN=TUBB4B PE=1 SV=1 - [TBB4B_HUMAN]	78.43	5	2	25	247	445	49.799	4.89404
	56	P07437	Tubulin beta chain OS=Homo sapiens GN=TUBB PE=1 SV=2 - [TBB5_HUMAN]	78.38	5	3	24	280	444	49.639	4.89404
	57	P08758	Annexin A5 OS=Homo sapiens GN=ANXA5 PE=1 SV=2 - [ANXA5_HUMAN]	78.13	1	15	28	389	320	35.9144	5.04639
	58	P13639	Elongation factor 2 OS=Homo sapiens GN=EEF2 PE=1 SV=4 - [EF2_HUMAN]	78.09	3	27	53	375	858	95.277	6.82959
	59	P35613-2	Isoform 2 of Basigin OS=Homo sapiens GN=BSG - [BASI_HUMAN]	78.07	4	6	16	129	269	29.2027	5.64307
	60	P07919	Cytochrome b-c1 complex subunit 6, mitochondrial OS=Homo sapiens GN=UQCRH PE=1 SV=2 - [QCR6_HUMAN]	78.02	1	2	6	19	91	10.7319	4.43701
	61	Q8N6I4	Transmembrane protein 251 OS=Homo sapiens GN=TMEM251 PE=2 SV=4 - [TM251_HUMAN]	77.91	3	1	5	23	163	18.7346	8.19189
	62	P23284	Peptidyl-prolyl cis-trans isomerase B OS=Homo sapiens GN=PPIB PE=1 SV=2 - [PPIB_HUMAN]	77.78	1	6	18	74	216	23.7275	9.40771
	63	P12111-4	Isoform 4 of Collagen alpha-3(VI) chain OS=Homo sapiens GN=COL6A3 - [CO6A3_HUMAN]	77.51	1	1	196	2440	2570	278.031	8.14795
	64	P08238	Heat shock protein HSP 90-beta OS=Homo sapiens GN=HSP90AB1 PE=1 SV=4 - [HS90B_HUMAN]	77.35	5	18	48	475	724	83.2121	5.03369
	65	P62258	14-3-3 protein epsilon OS=Homo sapiens GN=YWHAE PE=1 SV=1 - [1433E_HUMAN]	77.25	2	7	22	189	255	29.1554	4.7417
	66	P50990	T-complex protein 1 subunit theta OS=Homo sapiens GN=CCT8 PE=1 SV=4 - [TCPQ_HUMAN]	77.19	1	13	34	155	548	59.5825	5.60498
	67	O00299	Chloride intracellular channel protein 1 OS=Homo sapiens GN=CLIC1 PE=1 SV=4 - [CLIC1_HUMAN]	77.18	1	11	15	96	241	26.9057	5.17334
	68	Q08431	Lactadherin OS=Homo sapiens GN=MFGE8 PE=1 SV=2 - [MFGM_HUMAN]	77	3	18	26	307	387	43.0955	8.14795
	69	P60842	Eukaryotic initiation factor 4A-I OS=Homo sapiens GN=EIF4A1 PE=1 SV=1 - [IF4A1_HUMAN]	76.85	5	10	25	131	406	46.1246	5.47803
	70	P05556	Integrin beta-1 OS=Homo sapiens GN=ITGB1 PE=1 SV=2 - [ITB1_HUMAN]	76.69	5	25	49	565	798	88.357	5.38916
	71	P31939	Bifunctional purine biosynthesis protein PURH OS=Homo sapiens GN=ATIC PE=1 SV=3 - [PUR9_HUMAN]	76.69	1	9	37	94	592	64.5753	6.7124
	72	P63208	S-phase kinase-associated protein 1 OS=Homo sapiens GN=SKP1 PE=1 SV=2 - [SKP1_HUMAN]	76.69	1	1	7	12	163	18.6462	4.53857
	73	P14618-2	Isoform M1 of Pyruvate kinase PKM OS=Homo sapiens GN=PKM - [KPYM_HUMAN]	76.65	3	1	44	376	531	58.0249	7.7085
	74	P13489	Ribonuclease inhibitor OS=Homo sapiens GN=RNH1 PE=1 SV=2 - [RINI_HUMAN]	76.57	1	10	24	90	461	49.9411	4.81787
	75	P68366	Tubulin alpha-4A chain OS=Homo sapiens GN=TUBA4A PE=1 SV=1 - [TBA4A_HUMAN]	76.56	2	6	25	269	448	49.8924	5.05908
	76	P45880	Voltage-dependent anion-selective channel protein 2 OS=Homo sapiens GN=VDAC2 PE=1 SV=2 - [VDAC2_HUMAN]	76.53	3	5	13	28	294	31.5465	7.56201
	77	P50395	Rab GDP dissociation inhibitor beta OS=Homo sapiens GN=GDI2 PE=1 SV=2 - [GDIB_HUMAN]	76.4	2	7	28	146	445	50.6309	6.46826
	78	O43399-5	Isoform 5 of Tumor protein D54 OS=Homo sapiens GN=TPD52L2 - [TPD54_HUMAN]	76.36	7	1	16	60	220	23.772	5.73193
	79	Q8WUH1	Protein Churchill OS=Homo sapiens GN=CHURC1 PE=1 SV=2 - [CHUR_HUMAN]	76.26	3	1	6	16	139	16.1006	5.5415
	80	O00194	Ras-related protein Rab-27B OS=Homo sapiens GN=RAB27B PE=1 SV=4 - [RB27B_HUMAN]	76.15	3	2	14	37	218	24.5922	5.51611
	81	P21589	5'-nucleotidase OS=Homo sapiens GN=NT5E PE=1 SV=1 - [5NTD_HUMAN]	76.13	2	16	35	321	574	63.3275	7.03467
	82	P14618	Pyruvate kinase PKM OS=Homo sapiens GN=PKM PE=1 SV=4 - [KPYM_HUMAN]	76.08	4	5	45	475	531	57.9	7.84033
	83	P26038	Moesin OS=Homo sapiens GN=MSN PE=1 SV=3 - [MOES_HUMAN]	76.08	2	17	49	339	577	67.7778	6.40479
	84	P19105	Myosin regulatory light chain 12A OS=Homo sapiens GN=MYL12A PE=1 SV=2 - [ML12A_HUMAN]	76.02	3	4	11	65	171	19.7815	4.80518
	85	P30086	Phosphatidylethanolamine-binding protein 1 OS=Homo sapiens GN=PEBP1 PE=1 SV=3 - [PEBP1_HUMAN]	75.94	1	6	11	26	187	21.0437	7.53271
	86	P06576	ATP synthase subunit beta, mitochondrial OS=Homo sapiens GN=ATP5B PE=1 SV=3 - [ATPB_HUMAN]	75.8	1	7	27	131	529	56.5246	5.40186
	87	P49368	T-complex protein 1 subunit gamma OS=Homo sapiens GN=CCT3 PE=1 SV=4 - [TCPG_HUMAN]	75.78	3	10	33	164	545	60.4953	6.49365
	88	P61981	14-3-3 protein gamma OS=Homo sapiens GN=YWHAG PE=1 SV=2 - [1433G_HUMAN]	75.71	3	8	19	148	247	28.2849	4.89404
	89	P01892	HLA class I histocompatibility antigen, A-2 alpha chain OS=Homo sapiens GN=HLA-A PE=1 SV=1 - [1A02_HUMAN]	75.62	19	6	24	180	365	40.8962	6.99072
	90	P02042	Hemoglobin subunit delta OS=Homo sapiens GN=HBD PE=1 SV=2 - [HBD_HUMAN]	75.51	5	2	9	25	147	16.0453	8.04541
	91	P04899	Guanine nucleotide-binding protein G(i) subunit alpha-2 OS=Homo sapiens GN=GNAI2 PE=1 SV=3 - [GNAI2_HUMAN]	75.49	7	11	25	328	355	40.4251	5.5415
	92	P13640-2	Isoform 2 of Metallothionein-1G OS=Homo sapiens GN=MT1G - [MT1G_HUMAN]	75.41	8	3	5	49	61	6.06526	7.95752
	93	P20337	Ras-related protein Rab-3B OS=Homo sapiens GN=RAB3B PE=1 SV=2 - [RAB3B_HUMAN]	75.34	19	1	14	50	219	24.7421	5.021
	94	P63167	Dynein light chain 1, cytoplasmic OS=Homo sapiens GN=DYNLL1 PE=1 SV=1 - [DYL1_HUMAN]	75.28	2	1	5	28	89	10.3591	7.40088
	95	P12814-4	Isoform 4 of Alpha-actinin-1 OS=Homo sapiens GN=ACTN1 - [ACTN1_HUMAN]	75.27	6	11	62	271	930	107.074	5.57959
	96	P08754	Guanine nucleotide-binding protein G(k) subunit alpha OS=Homo sapiens GN=GNAI3 PE=1 SV=3 - [GNAI3_HUMAN]	75.14	4	13	25	274	354	40.5063	5.69385
	97	P04792	Heat shock protein beta-1 OS=Homo sapiens GN=HSPB1 PE=1 SV=2 - [HSPB1_HUMAN]	75.12	1	8	12	59	205	22.7685	6.40479
	98	Q8WUM4-2	Isoform 2 of Programmed cell death 6-interacting protein OS=Homo sapiens GN=PDCD6IP - [PDC6I_HUMAN]	74.91	2	33	59	440	873	96.7114	6.52197
	99	P14678-2	Isoform SM-B of Small nuclear ribonucleoprotein-associated proteins B and B' OS=Homo sapiens GN=SNRPB - [RSMB_HUMAN]	74.89	4	1	17	49	231	23.6402	10.9019
	100	P00698	Lysozyme C OS=Gallus gallus GN=LYZ PE=1 SV=1 - [LYSC_CHICK]	74.83	1	13	16	581	147	16.228	9.0708
	101	P11142	Heat shock cognate 71 kDa protein OS=Homo sapiens GN=HSPA8 PE=1 SV=1 - [HSP7C_HUMAN]	74.61	3	21	43	462	646	70.8542	5.51611
	102	P09417	Dihydropteridine reductase OS=Homo sapiens GN=QDPR PE=1 SV=2 - [DHPR_HUMAN]	74.59	1	1	11	34	244	25.773	7.37158
	103	Q9H6B4	CXADR-like membrane protein OS=Homo sapiens GN=CLMP PE=1 SV=1 - [CLMP_HUMAN]	74.53	1	2	15	31	373	41.2552	7.98682
	104	A6NHS1	Putative uncharacterized protein ENSP00000347057 OS=Homo sapiens PE=5 SV=3 - [YK042_HUMAN]	74.47	1	1	3	6	94	10.2048	4.18311
	105	Q13501-2	Isoform 2 of Sequestosome-1 OS=Homo sapiens GN=SQSTM1 - [SQSTM_HUMAN]	74.44	2	5	17	54	356	38.6045	5.46533
	106	P12111	Collagen alpha-3(VI) chain OS=Homo sapiens GN=COL6A3 PE=1 SV=5 - [CO6A3_HUMAN]	74.38	4	24	226	2735	3177	343.457	6.68311
	107	P62330	ADP-ribosylation factor 6 OS=Homo sapiens GN=ARF6 PE=1 SV=2 - [ARF6_HUMAN]	74.29	5	3	10	20	175	20.0694	8.95361
	108	Q8TE04-2	Isoform 2 of Pantothenate kinase 1 OS=Homo sapiens GN=PANK1 - [PANK1_HUMAN]	74.26	2	1	19	38	373	41.6437	6.32861
	109	Q9H299	SH3 domain-binding glutamic acid-rich-like protein 3 OS=Homo sapiens GN=SH3BGRL3 PE=1 SV=1 - [SH3L3_HUMAN]	74.19	1	3	5	25	93	10.4313	4.93213
	110	P31946-2	Isoform Short of 14-3-3 protein beta/alpha OS=Homo sapiens GN=YWHAB - [1433B_HUMAN]	73.77	4	8	18	151	244	27.8327	4.83057
	111	P16152	Carbonyl reductase [NADPH] 1 OS=Homo sapiens GN=CBR1 PE=1 SV=3 - [CBR1_HUMAN]	73.65	2	7	18	76	277	30.3559	8.32373
	112	P32856-3	Isoform 2 of Syntaxin-2 OS=Homo sapiens GN=STX2 - [STX2_HUMAN]	73.65	3	2	16	40	277	32.4043	6.26514
	113	P50991	T-complex protein 1 subunit delta OS=Homo sapiens GN=CCT4 PE=1 SV=4 - [TCPD_HUMAN]	73.47	2	9	30	111	539	57.8878	7.82568
	114	P51149	Ras-related protein Rab-7a OS=Homo sapiens GN=RAB7A PE=1 SV=1 - [RAB7A_HUMAN]	73.43	1	7	15	100	207	23.4748	6.69775
	115	P24666-2	Isoform 2 of Low molecular weight phosphotyrosine protein phosphatase OS=Homo sapiens GN=ACP1 - [PPAC_HUMAN]	73.42	3	1	7	9	158	17.9659	6.87354
	116	P48643	T-complex protein 1 subunit epsilon OS=Homo sapiens GN=CCT5 PE=1 SV=1 - [TCPE_HUMAN]	73.38	1	10	33	145	541	59.6328	5.65576
	117	O60682	Musculin OS=Homo sapiens GN=MSC PE=1 SV=2 - [MUSC_HUMAN]	73.3	1	1	10	22	206	22.0541	9.08545
	118	Q15582	Transforming growth factor-beta-induced protein ig-h3 OS=Homo sapiens GN=TGFBI PE=1 SV=1 - [BGH3_HUMAN]	73.21	1	23	41	263	683	74.634	7.7085
	119	Q96SD1-3	Isoform 3 of Protein artemis OS=Homo sapiens GN=DCLRE1C - [DCR1C_HUMAN]	73.14	1	1	23	41	577	65.2901	5.66846
	120	P54709	Sodium/potassium-transporting ATPase subunit beta-3 OS=Homo sapiens GN=ATP1B3 PE=1 SV=1 - [AT1B3_HUMAN]	73.12	1	7	16	107	279	31.4921	8.35303
	121	O60488	Long-chain-fatty-acid--CoA ligase 4 OS=Homo sapiens GN=ACSL4 PE=1 SV=2 - [ACSL4_HUMAN]	73	3	16	41	190	711	79.1367	8.38232
	122	O75874	Isocitrate dehydrogenase [NADP] cytoplasmic OS=Homo sapiens GN=IDH1 PE=1 SV=2 - [IDHC_HUMAN]	72.95	2	4	25	64	414	46.6295	7.00537
	123	Q9HAV0	Guanine nucleotide-binding protein subunit beta-4 OS=Homo sapiens GN=GNB4 PE=1 SV=3 - [GBB4_HUMAN]	72.94	2	3	21	131	340	37.543	5.99854
	124	P17936	Insulin-like growth factor-binding protein 3 OS=Homo sapiens GN=IGFBP3 PE=1 SV=2 - [IBP3_HUMAN]	72.85	2	8	19	68	291	31.6537	8.68994
	125	Q6PJG6	BRCA1-associated ATM activator 1 OS=Homo sapiens GN=BRAT1 PE=1 SV=2 - [BRAT1_HUMAN]	72.84	1	1	33	69	821	88.0629	5.2749
	126	P28062	Proteasome subunit beta type-8 OS=Homo sapiens GN=PSMB8 PE=1 SV=3 - [PSB8_HUMAN]	72.83	2	1	13	44	276	30.3346	7.43018
	127	P12109	Collagen alpha-1(VI) chain OS=Homo sapiens GN=COL6A1 PE=1 SV=3 - [CO6A1_HUMAN]	72.47	1	30	55	609	1028	108.462	5.42725
	128	P04083	Annexin A1 OS=Homo sapiens GN=ANXA1 PE=1 SV=2 - [ANXA1_HUMAN]	72.25	1	20	28	430	346	38.69	7.02002
	129	P63104	14-3-3 protein zeta/delta OS=Homo sapiens GN=YWHAZ PE=1 SV=1 - [1433Z_HUMAN]	72.24	2	11	19	289	245	27.7277	4.79248
	130	Q6SA08-2	Isoform 2 of Testis-specific serine/threonine-protein kinase 4 OS=Homo sapiens GN=TSSK4 - [TSSK4_HUMAN]	72.19	3	1	18	55	338	38.4138	8.68994
	131	P78371	T-complex protein 1 subunit beta OS=Homo sapiens GN=CCT2 PE=1 SV=4 - [TCPB_HUMAN]	72.15	2	16	36	215	535	57.4521	6.45557
	132	P10809	60 kDa heat shock protein, mitochondrial OS=Homo sapiens GN=HSPD1 PE=1 SV=2 - [CH60_HUMAN]	71.9	1	17	38	200	573	61.0164	5.87158
	133	P20645	Cation-dependent mannose-6-phosphate receptor OS=Homo sapiens GN=M6PR PE=1 SV=1 - [MPRD_HUMAN]	71.84	1	2	16	37	277	30.9734	5.8335
	134	O00165-6	Isoform 6 of HCLS1-associated protein X-1 OS=Homo sapiens GN=HAX1 - [HAX1_HUMAN]	71.73	1	1	10	25	191	21.7876	6.52197
	135	P05387	60S acidic ribosomal protein P2 OS=Homo sapiens GN=RPLP2 PE=1 SV=1 - [RLA2_HUMAN]	71.3	1	4	7	75	115	11.6578	4.53857
	136	P08107	Heat shock 70 kDa protein 1A/1B OS=Homo sapiens GN=HSPA1A PE=1 SV=5 - [HSP71_HUMAN]	71.14	3	13	35	154	641	70.009	5.65576
	137	P23528	Cofilin-1 OS=Homo sapiens GN=CFL1 PE=1 SV=3 - [COF1_HUMAN]	71.08	3	9	14	156	166	18.4907	8.08936
	138	P61026	Ras-related protein Rab-10 OS=Homo sapiens GN=RAB10 PE=1 SV=1 - [RAB10_HUMAN]	71	18	3	15	120	200	22.5266	8.38232
	139	Q16719	Kynureninase OS=Homo sapiens GN=KYNU PE=1 SV=1 - [KYNU_HUMAN]	70.75	1	4	19	55	465	52.3182	7.03467
	140	P01116-2	Isoform 2B of GTPase KRas OS=Homo sapiens GN=KRAS - [RASK_HUMAN]	70.74	3	1	12	61	188	21.4109	8.11865
	141	Q04917	14-3-3 protein eta OS=Homo sapiens GN=YWHAH PE=1 SV=4 - [1433F_HUMAN]	70.73	3	6	16	88	246	28.201	4.84326
	142	E5RJM6-2	Isoform 2 of Ankyrin repeat domain-containing protein 65 OS=Homo sapiens GN=ANKRD65 - [ANR65_HUMAN]	70.69	1	1	9	18	174	19.3623	5.32568
	143	Q71U36-2	Isoform 2 of Tubulin alpha-1A chain OS=Homo sapiens GN=TUBA1A - [TBA1A_HUMAN]	70.67	5	6	23	291	416	46.2678	5.08447
	144	P01708	Ig lambda chain V-II region BUR OS=Homo sapiens PE=1 SV=1 - [LV205_HUMAN]	70.64	1	1	3	6	109	11.4986	7.86963
	145	P63218	Guanine nucleotide-binding protein G(I)/G(S)/G(O) subunit gamma-5 OS=Homo sapiens GN=GNG5 PE=1 SV=3 - [GBG5_HUMAN]	70.59	1	2	3	11	68	7.31381	9.84717
	146	Q14344	Guanine nucleotide-binding protein subunit alpha-13 OS=Homo sapiens GN=GNA13 PE=1 SV=2 - [GNA13_HUMAN]	70.56	3	6	23	96	377	44.0217	8.00146
	147	Q9BWD1	Acetyl-CoA acetyltransferase, cytosolic OS=Homo sapiens GN=ACAT2 PE=1 SV=2 - [THIC_HUMAN]	70.53	1	1	19	31	397	41.3244	6.91748
	148	Q9BUL8	Programmed cell death protein 10 OS=Homo sapiens GN=PDCD10 PE=1 SV=1 - [PDC10_HUMAN]	70.28	1	3	13	39	212	24.6858	8.19189
	149	Q03013-2	Isoform 2 of Glutathione S-transferase Mu 4 OS=Homo sapiens GN=GSTM4 - [GSTM4_HUMAN]	70.26	5	1	10	30	195	22.8143	5.09717
	150	P47756-2	Isoform 2 of F-actin-capping protein subunit beta OS=Homo sapiens GN=CAPZB - [CAPZB_HUMAN]	70.22	2	5	15	56	272	30.6094	5.99854
	151	Q15907	Ras-related protein Rab-11B OS=Homo sapiens GN=RAB11B PE=1 SV=4 - [RB11B_HUMAN]	70.18	4	8	13	58	218	24.4735	5.93506
	152	P62136-2	Isoform 2 of Serine/threonine-protein phosphatase PP1-alpha catalytic subunit OS=Homo sapiens GN=PPP1CA - [PP1A_HUMAN]	70.09	6	5	21	65	341	38.6064	6.62451
	153	P67809	Nuclease-sensitive element-binding protein 1 OS=Homo sapiens GN=YBX1 PE=1 SV=3 - [YBOX1_HUMAN]	70.06	5	5	15	65	324	35.9027	9.87646
	154	P04075	Fructose-bisphosphate aldolase A OS=Homo sapiens GN=ALDOA PE=1 SV=2 - [ALDOA_HUMAN]	70.05	2	15	25	245	364	39.3953	8.08936
	155	Q9Y696	Chloride intracellular channel protein 4 OS=Homo sapiens GN=CLIC4 PE=1 SV=4 - [CLIC4_HUMAN]	69.96	1	4	13	74	253	28.7537	5.59229
	156	Q562R1	Beta-actin-like protein 2 OS=Homo sapiens GN=ACTBL2 PE=1 SV=2 - [ACTBL_HUMAN]	69.95	1	3	20	214	376	41.976	5.59229
	157	P29992	Guanine nucleotide-binding protein subunit alpha-11 OS=Homo sapiens GN=GNA11 PE=1 SV=2 - [GNA11_HUMAN]	69.92	3	8	22	102	359	42.0965	5.69385
	158	Q06830	Peroxiredoxin-1 OS=Homo sapiens GN=PRDX1 PE=1 SV=1 - [PRDX1_HUMAN]	69.85	1	8	14	142	199	22.0963	8.1333
	159	P17987	T-complex protein 1 subunit alpha OS=Homo sapiens GN=TCP1 PE=1 SV=1 - [TCPA_HUMAN]	69.78	1	13	31	131	556	60.3056	6.11279
	160	P09471-2	Isoform Alpha-2 of Guanine nucleotide-binding protein G(o) subunit alpha OS=Homo sapiens GN=GNAO1 - [GNAO_HUMAN]	69.77	2	1	19	107	354	40.0611	5.89697
	161	O43678	NADH dehydrogenase [ubiquinone] 1 alpha subcomplex subunit 2 OS=Homo sapiens GN=NDUFA2 PE=1 SV=3 - [NDUA2_HUMAN]	69.7	2	1	5	16	99	10.9148	9.56885
	162	P08133	Annexin A6 OS=Homo sapiens GN=ANXA6 PE=1 SV=3 - [ANXA6_HUMAN]	69.69	2	19	46	216	673	75.8256	5.60498
	163	O00571-2	Isoform 2 of ATP-dependent RNA helicase DDX3X OS=Homo sapiens GN=DDX3X - [DDX3X_HUMAN]	69.66	3	4	34	100	646	71.3109	6.62451
	164	P02545	Prelamin-A/C OS=Homo sapiens GN=LMNA PE=1 SV=1 - [LMNA_HUMAN]	69.43	4	13	46	109	664	74.0947	7.02002
	165	Q8NEU8-3	Isoform 3 of DCC-interacting protein 13-beta OS=Homo sapiens GN=APPL2 - [DP13B_HUMAN]	69.4	1	1	29	57	670	75.1366	4.93213
	166	Q99584	Protein S100-A13 OS=Homo sapiens GN=S100A13 PE=1 SV=1 - [S10AD_HUMAN]	69.39	1	3	6	26	98	11.4641	6.16357
	167	Q8IW50-4	Isoform 4 of Protein FAM219A OS=Homo sapiens GN=FAM219A - [F219A_HUMAN]	69.36	7	1	9	24	173	19.068	4.70361
	168	Q00610-2	Isoform 2 of Clathrin heavy chain 1 OS=Homo sapiens GN=CLTC - [CLH1_HUMAN]	69.13	4	47	88	517	1639	187.771	5.69385
	169	P0C7L1	Serine protease inhibitor Kazal-type 8 OS=Homo sapiens GN=SPINK8 PE=2 SV=1 - [ISK8_HUMAN]	69.07	1	1	4	7	97	10.8132	5.05908
	170	P51153	Ras-related protein Rab-13 OS=Homo sapiens GN=RAB13 PE=1 SV=1 - [RAB13_HUMAN]	68.97	1	3	14	121	203	22.7597	9.18799
	171	Q99436	Proteasome subunit beta type-7 OS=Homo sapiens GN=PSMB7 PE=1 SV=1 - [PSB7_HUMAN]	68.95	1	1	11	27	277	29.9462	7.6792
	172	P51161-2	Isoform 2 of Gastrotropin OS=Homo sapiens GN=FABP6 - [FABP6_HUMAN]	68.93	2	1	10	35	177	19.861	9.26123
	173	Q8TAQ9	SUN domain-containing protein 3 OS=Homo sapiens GN=SUN3 PE=2 SV=4 - [SUN3_HUMAN]	68.91	2	1	16	50	357	40.4776	7.82568
	174	Q16842	CMP-N-acetylneuraminate-beta-galactosamide-alpha-2,3-sialyltransferase 2 OS=Homo sapiens GN=ST3GAL2 PE=2 SV=1 - [SIA4B_HUMAN]	68.86	1	1	18	52	350	40.1468	8.35303
	175	Q6IPX3-2	Isoform 2 of Transcription elongation factor A protein-like 6 OS=Homo sapiens GN=TCEAL6 - [TCAL6_HUMAN]	68.85	1	1	8	16	183	20.3325	4.80518
	176	P10301	Ras-related protein R-Ras OS=Homo sapiens GN=RRAS PE=1 SV=1 - [RRAS_HUMAN]	68.81	1	7	13	83	218	23.4659	6.93213
	177	P02751	Fibronectin OS=Homo sapiens GN=FN1 PE=1 SV=4 - [FINC_HUMAN]	68.52	17	84	124	1681	2386	262.46	5.70654
	178	P06756-3	Isoform 3 of Integrin alpha-V OS=Homo sapiens GN=ITGAV - [ITAV_HUMAN]	68.46	3	29	59	290	1002	111.061	5.61768
	179	P11233	Ras-related protein Ral-A OS=Homo sapiens GN=RALA PE=1 SV=1 - [RALA_HUMAN]	68.45	2	6	14	64	206	23.552	7.10791
	180	Q9UHQ1-3	Isoform 3 of Nuclear prelamin A recognition factor OS=Homo sapiens GN=NARF - [NARF_HUMAN]	68.38	4	1	21	43	408	45.767	7.1958
	181	P35232	Prohibitin OS=Homo sapiens GN=PHB PE=1 SV=1 - [PHB_HUMAN]	68.38	1	7	15	61	272	29.7859	5.75732
	182	P06396-3	Isoform 3 of Gelsolin OS=Homo sapiens GN=GSN - [GELS_HUMAN]	68.33	3	7	33	85	742	81.8901	5.84619
	183	P51148-2	Isoform 2 of Ras-related protein Rab-5C OS=Homo sapiens GN=RAB5C - [RAB5C_HUMAN]	68.27	2	4	13	76	249	27.0185	8.66064
	184	Q16777	Histone H2A type 2-C OS=Homo sapiens GN=HIST2H2AC PE=1 SV=4 - [H2A2C_HUMAN]	68.22	20	4	9	105	129	13.9798	10.9019
	185	Q14764	Major vault protein OS=Homo sapiens GN=MVP PE=1 SV=4 - [MVP_HUMAN]	68.2	1	31	51	330	893	99.2659	5.47803
	186	O43854-2	Isoform 2 of EGF-like repeat and discoidin I-like domain-containing protein 3 OS=Homo sapiens GN=EDIL3 - [EDIL3_HUMAN]	68.09	2	22	33	406	470	52.7136	7.78174
	187	P60953	Cell division control protein 42 homolog OS=Homo sapiens GN=CDC42 PE=1 SV=2 - [CDC42_HUMAN]	68.06	5	9	15	126	191	21.245	6.55127
	188	P60903	Protein S100-A10 OS=Homo sapiens GN=S100A10 PE=1 SV=2 - [S10AA_HUMAN]	68.04	1	4	9	98	97	11.1955	7.37158
	189	Q08380	Galectin-3-binding protein OS=Homo sapiens GN=LGALS3BP PE=1 SV=1 - [LG3BP_HUMAN]	68.03	1	21	34	462	585	65.2893	5.2749
	190	Q96PB8	Leucine-rich repeat-containing protein 3B OS=Homo sapiens GN=LRRC3B PE=2 SV=1 - [LRC3B_HUMAN]	67.95	1	1	12	27	259	29.2557	6.96143
	191	Q5QNW6-2	Isoform 2 of Histone H2B type 2-F OS=Homo sapiens GN=HIST2H2BF - [H2B2F_HUMAN]	67.91	16	5	12	92	134	14.8322	10.3452
	192	Q15672	Twist-related protein 1 OS=Homo sapiens GN=TWIST1 PE=1 SV=1 - [TWST1_HUMAN]	67.82	1	1	10	27	202	20.9412	9.43701
	193	O00560	Syntenin-1 OS=Homo sapiens GN=SDCBP PE=1 SV=1 - [SDCB1_HUMAN]	67.79	3	8	14	158	298	32.4239	7.53271
	194	P30044	Peroxiredoxin-5, mitochondrial OS=Homo sapiens GN=PRDX5 PE=1 SV=4 - [PRDX5_HUMAN]	67.76	4	2	13	43	214	22.0725	8.70459
	195	Q15084	Protein disulfide-isomerase A6 OS=Homo sapiens GN=PDIA6 PE=1 SV=1 - [PDIA6_HUMAN]	67.73	2	5	22	64	440	48.0913	5.08447
	196	Q9UHD8-5	Isoform 5 of Septin-9 OS=Homo sapiens GN=SEPT9 - [SEPT9_HUMAN]	67.7	8	3	34	74	579	64.6413	7.57666
	197	O15498	Synaptobrevin homolog YKT6 OS=Homo sapiens GN=YKT6 PE=1 SV=1 - [YKT6_HUMAN]	67.68	1	4	11	40	198	22.4034	6.91748
	198	Q06210	Glutamine--fructose-6-phosphate aminotransferase [isomerizing] 1 OS=Homo sapiens GN=GFPT1 PE=1 SV=3 - [GFPT1_HUMAN]	67.67	2	4	35	76	699	78.7563	7.10791
	199	P31949	Protein S100-A11 OS=Homo sapiens GN=S100A11 PE=1 SV=2 - [S10AB_HUMAN]	67.62	1	4	5	63	105	11.7328	7.12256
	200	P09543-2	Isoform CNPI of 2',3'-cyclic-nucleotide 3'-phosphodiesterase OS=Homo sapiens GN=CNP - [CN37_HUMAN]	67.58	2	10	28	112	401	45.0703	8.52881
	201	Q9P2B2	Prostaglandin F2 receptor negative regulator OS=Homo sapiens GN=PTGFRN PE=1 SV=2 - [FPRP_HUMAN]	67.58	1	34	50	426	879	98.4946	6.60986
	202	P52429	Diacylglycerol kinase epsilon OS=Homo sapiens GN=DGKE PE=1 SV=1 - [DGKE_HUMAN]	67.55	1	2	25	77	567	63.8849	7.73779
	203	P30153	Serine/threonine-protein phosphatase 2A 65 kDa regulatory subunit A alpha isoform OS=Homo sapiens GN=PPP2R1A PE=1 SV=4 - [2AAA_HUMAN]	67.4	6	8	27	103	589	65.2669	5.10986
	204	Q12799-2	Isoform 2 of T-complex protein 10A homolog OS=Homo sapiens GN=TCP10 - [TCP10_HUMAN]	67.38	3	1	19	47	325	35.4196	9.61279
	205	P25786	Proteasome subunit alpha type-1 OS=Homo sapiens GN=PSMA1 PE=1 SV=1 - [PSA1_HUMAN]	67.3	2	2	14	27	263	29.5369	6.60986
	206	Q6ZS02	Putative GED domain-containing protein DNM1P46 OS=Homo sapiens GN=DNM1P46 PE=5 SV=1 - [DMP46_HUMAN]	67.27	1	1	8	27	220	23.7247	8.23584
	207	Q13303-3	Isoform 3 of Voltage-gated potassium channel subunit beta-2 OS=Homo sapiens GN=KCNAB2 - [KCAB2_HUMAN]	67.23	1	1	20	38	415	46.4967	8.71924
	208	P84085	ADP-ribosylation factor 5 OS=Homo sapiens GN=ARF5 PE=1 SV=2 - [ARF5_HUMAN]	67.22	2	2	12	86	180	20.5166	6.78564
	209	Q86UD7	TBC1 domain family member 26 OS=Homo sapiens GN=TBC1D26 PE=2 SV=3 - [TBC26_HUMAN]	67.2	1	1	12	16	250	28.821	9.71533
	210	P30481	HLA class I histocompatibility antigen, B-44 alpha chain OS=Homo sapiens GN=HLA-B PE=1 SV=1 - [1B44_HUMAN]	67.13	20	5	20	87	362	40.4561	6.03662
	211	Q15366-3	Isoform 3 of Poly(rC)-binding protein 2 OS=Homo sapiens GN=PCBP2 - [PCBP2_HUMAN]	67.13	11	4	13	37	362	38.1974	6.78564
	212	P36405	ADP-ribosylation factor-like protein 3 OS=Homo sapiens GN=ARL3 PE=1 SV=2 - [ARL3_HUMAN]	67.03	1	1	7	10	182	20.4428	7.23975
	213	P08174-2	Isoform 1 of Complement decay-accelerating factor OS=Homo sapiens GN=CD55 - [DAF_HUMAN]	66.82	7	1	18	32	440	48.6862	8.36768
	214	Q05084-2	Isoform 2 of Islet cell autoantigen 1 OS=Homo sapiens GN=ICA1 - [ICA69_HUMAN]	66.8	1	1	25	66	512	57.8849	5.90967
	215	Q9UBI6	Guanine nucleotide-binding protein G(I)/G(S)/G(O) subunit gamma-12 OS=Homo sapiens GN=GNG12 PE=1 SV=3 - [GBG12_HUMAN]	66.67	1	3	4	50	72	8.00117	8.96826
	216	Q8IUX1-2	Isoform 2 of Transmembrane protein 126B OS=Homo sapiens GN=TMEM126B - [T126B_HUMAN]	66.67	4	1	9	43	219	25.0119	8.82178
	217	Q99832	T-complex protein 1 subunit eta OS=Homo sapiens GN=CCT7 PE=1 SV=2 - [TCPH_HUMAN]	66.67	4	15	29	137	543	59.3289	7.6499
	218	P08195-2	Isoform 2 of 4F2 cell-surface antigen heavy chain OS=Homo sapiens GN=SLC3A2 - [4F2_HUMAN]	66.35	4	17	29	179	529	57.9089	5.35107
	219	P41221	Protein Wnt-5a OS=Homo sapiens GN=WNT5A PE=1 SV=2 - [WNT5A_HUMAN]	66.32	2	4	21	53	380	42.3114	8.45557
	220	Q6UXS9	Inactive caspase-12 OS=Homo sapiens GN=CASP12 PE=2 SV=2 - [CASPC_HUMAN]	66.28	2	1	15	56	341	38.8403	6.02393
	221	Q8NAA5	Leucine-rich repeat-containing protein FAM211A OS=Homo sapiens GN=FAM211A PE=2 SV=2 - [F211A_HUMAN]	66.28	2	1	16	44	344	37.7567	8.44092
	222	P32969	60S ribosomal protein L9 OS=Homo sapiens GN=RPL9 PE=1 SV=1 - [RL9_HUMAN]	66.15	1	1	10	13	192	21.8498	9.94971
	223	Q9UNM6-2	Isoform 2 of 26S proteasome non-ATPase regulatory subunit 13 OS=Homo sapiens GN=PSMD13 - [PSD13_HUMAN]	66.14	2	5	16	28	378	42.9151	6.53662
	224	Q9H0H5	Rac GTPase-activating protein 1 OS=Homo sapiens GN=RACGAP1 PE=1 SV=1 - [RGAP1_HUMAN]	66.14	1	9	29	90	632	70.9818	8.88037
	225	P07741	Adenine phosphoribosyltransferase OS=Homo sapiens GN=APRT PE=1 SV=2 - [APT_HUMAN]	66.11	2	3	10	31	180	19.5954	6.02393
	226	P58546	Myotrophin OS=Homo sapiens GN=MTPN PE=1 SV=2 - [MTPN_HUMAN]	66.1	1	3	8	31	118	12.8866	5.51611
	227	P50148	Guanine nucleotide-binding protein G(q) subunit alpha OS=Homo sapiens GN=GNAQ PE=1 SV=4 - [GNAQ_HUMAN]	66.02	2	1	18	65	359	42.1153	5.68115
	228	P10768	S-formylglutathione hydrolase OS=Homo sapiens GN=ESD PE=1 SV=2 - [ESTD_HUMAN]	65.96	1	4	14	42	282	31.4425	7.02002
	229	P00338-3	Isoform 3 of L-lactate dehydrogenase A chain OS=Homo sapiens GN=LDHA - [LDHA_HUMAN]	65.93	8	12	23	269	361	39.8119	8.42627
	230	P15880	40S ribosomal protein S2 OS=Homo sapiens GN=RPS2 PE=1 SV=2 - [RS2_HUMAN]	65.87	1	6	18	75	293	31.3046	10.2427
	231	O94808	Glutamine--fructose-6-phosphate aminotransferase [isomerizing] 2 OS=Homo sapiens GN=GFPT2 PE=1 SV=3 - [GFPT2_HUMAN]	65.84	1	8	35	110	682	76.8818	7.37158
	232	P21333	Filamin-A OS=Homo sapiens GN=FLNA PE=1 SV=4 - [FLNA_HUMAN]	65.73	2	62	125	683	2647	280.564	6.06201
	233	Q99873-4	Isoform 4 of Protein arginine N-methyltransferase 1 OS=Homo sapiens GN=PRMT1 - [ANM1_HUMAN]	65.72	4	1	15	32	353	40.522	5.50342
	234	P58294	Prokineticin-1 OS=Homo sapiens GN=PROK1 PE=1 SV=1 - [PROK1_HUMAN]	65.71	1	1	5	17	105	11.7067	8.5874
	235	Q8IUW5	RELT-like protein 1 OS=Homo sapiens GN=RELL1 PE=1 SV=1 - [RELL1_HUMAN]	65.68	1	1	9	12	271	29.3219	8.33838
	236	Q08257	Quinone oxidoreductase OS=Homo sapiens GN=CRYZ PE=1 SV=1 - [QOR_HUMAN]	65.65	3	1	15	45	329	35.1845	8.44092
	237	Q99536	Synaptic vesicle membrane protein VAT-1 homolog OS=Homo sapiens GN=VAT1 PE=1 SV=2 - [VAT1_HUMAN]	65.65	1	8	16	172	393	41.8934	6.29053
	238	Q99471	Prefoldin subunit 5 OS=Homo sapiens GN=PFDN5 PE=1 SV=2 - [PFD5_HUMAN]	65.58	3	2	6	18	154	17.317	6.32861
	239	P28066	Proteasome subunit alpha type-5 OS=Homo sapiens GN=PSMA5 PE=1 SV=3 - [PSA5_HUMAN]	65.56	2	3	12	31	241	26.3942	4.79248
	240	Q9H9B4	Sideroflexin-1 OS=Homo sapiens GN=SFXN1 PE=1 SV=4 - [SFXN1_HUMAN]	65.53	1	1	13	38	322	35.5963	9.0708
	241	P30050	60S ribosomal protein L12 OS=Homo sapiens GN=RPL12 PE=1 SV=1 - [RL12_HUMAN]	65.45	2	3	9	49	165	17.8075	9.42236
	242	Q9ULC3	Ras-related protein Rab-23 OS=Homo sapiens GN=RAB23 PE=1 SV=1 - [RAB23_HUMAN]	65.4	1	2	10	24	237	26.6425	6.59521
	243	P35221-2	Isoform 2 of Catenin alpha-1 OS=Homo sapiens GN=CTNNA1 - [CTNA1_HUMAN]	65.38	5	12	53	151	930	102.571	6.34131
	244	P21796	Voltage-dependent anion-selective channel protein 1 OS=Homo sapiens GN=VDAC1 PE=1 SV=2 - [VDAC1_HUMAN]	65.37	3	8	14	75	283	30.7536	8.54346
	245	P21964	Catechol O-methyltransferase OS=Homo sapiens GN=COMT PE=1 SV=2 - [COMT_HUMAN]	65.31	2	1	9	17	271	30.0176	5.46533
	246	P59998-3	Isoform 3 of Actin-related protein 2/3 complex subunit 4 OS=Homo sapiens GN=ARPC4 - [ARPC4_HUMAN]	65.24	4	4	11	52	187	21.5742	8.5874
	247	P47895	Aldehyde dehydrogenase family 1 member A3 OS=Homo sapiens GN=ALDH1A3 PE=1 SV=2 - [AL1A3_HUMAN]	65.23	4	12	24	95	512	56.0728	7.25439
	248	P25398	40S ribosomal protein S12 OS=Homo sapiens GN=RPS12 PE=1 SV=3 - [RS12_HUMAN]	65.15	1	3	7	17	132	14.5055	7.21045
	249	Q8N0U4	Protein FAM185A OS=Homo sapiens GN=FAM185A PE=2 SV=3 - [F185A_HUMAN]	65.05	1	1	12	28	392	42.2746	7.97217
	250	P53396	ATP-citrate synthase OS=Homo sapiens GN=ACLY PE=1 SV=3 - [ACLY_HUMAN]	64.94	2	21	59	273	1101	120.762	7.32764
	251	P09525	Annexin A4 OS=Homo sapiens GN=ANXA4 PE=1 SV=4 - [ANXA4_HUMAN]	64.89	1	7	24	90	319	35.8601	6.12549
	252	P0C7N1	Olfactory receptor 8U8 OS=Homo sapiens GN=OR8U8 PE=2 SV=1 - [OR8U8_HUMAN]	64.89	1	1	9	22	319	36.3097	8.44092
	253	Q96JD6-5	Isoform 5 of 1,5-anhydro-D-fructose reductase OS=Homo sapiens GN=AKR1E2 - [AKCL2_HUMAN]	64.86	1	1	7	17	222	25.676	7.03467
	254	P52799	Ephrin-B2 OS=Homo sapiens GN=EFNB2 PE=1 SV=1 - [EFNB2_HUMAN]	64.86	1	1	14	20	333	36.8998	8.85107
	255	P07108-5	Isoform 5 of Acyl-CoA-binding protein OS=Homo sapiens GN=DBI - [ACBP_HUMAN]	64.86	5	2	11	35	148	16.4844	9.37842
	256	O14994	Synapsin-3 OS=Homo sapiens GN=SYN3 PE=1 SV=2 - [SYN3_HUMAN]	64.83	1	1	25	55	580	63.2627	9.39307
	257	P43490	Nicotinamide phosphoribosyltransferase OS=Homo sapiens GN=NAMPT PE=1 SV=1 - [NAMPT_HUMAN]	64.77	1	14	27	132	491	55.4866	7.15186
	258	O15527-5	Isoform 2B of N-glycosylase/DNA lyase OS=Homo sapiens GN=OGG1 - [OGG1_HUMAN]	64.71	1	1	15	35	357	39.7042	6.91748
	259	Q13409-6	Isoform 2F of Cytoplasmic dynein 1 intermediate chain 2 OS=Homo sapiens GN=DYNC1I2 - [DC1I2_HUMAN]	64.65	5	1	20	44	611	68.2557	5.2876
	260	Q09666	Neuroblast differentiation-associated protein AHNAK OS=Homo sapiens GN=AHNAK PE=1 SV=2 - [AHNK_HUMAN]	64.6	2	41	267	865	5890	628.699	6.15088
	261	Q53F39-4	Isoform 4 of Metallophosphoesterase 1 OS=Homo sapiens GN=MPPE1 - [MPPE1_HUMAN]	64.56	2	1	13	23	333	38.2456	7.32764
	262	Q99623	Prohibitin-2 OS=Homo sapiens GN=PHB2 PE=1 SV=2 - [PHB2_HUMAN]	64.55	2	5	20	57	299	33.2759	9.83252
	263	Q13740	CD166 antigen OS=Homo sapiens GN=ALCAM PE=1 SV=2 - [CD166_HUMAN]	64.49	2	8	25	66	583	65.0611	6.25244
	264	P14868	Aspartate--tRNA ligase, cytoplasmic OS=Homo sapiens GN=DARS PE=1 SV=2 - [SYDC_HUMAN]	64.47	1	7	28	72	501	57.1	6.55127
	265	P57729	Ras-related protein Rab-38 OS=Homo sapiens GN=RAB38 PE=1 SV=1 - [RAB38_HUMAN]	64.45	3	1	10	23	211	23.697	7.76709
	266	O75340	Programmed cell death protein 6 OS=Homo sapiens GN=PDCD6 PE=1 SV=1 - [PDCD6_HUMAN]	64.4	2	4	10	43	191	21.8548	5.40186
	267	A2RTY3-3	Isoform 3 of Uncharacterized protein C17orf66 OS=Homo sapiens GN=C17orf66 - [CQ066_HUMAN]	64.34	3	1	26	74	530	60.7639	8.98291
	268	Q9UGI8-2	Isoform 2 of Testin OS=Homo sapiens GN=TES - [TES_HUMAN]	64.32	2	1	22	43	412	46.8783	7.59131
	269	P01911	HLA class II histocompatibility antigen, DRB1-15 beta chain OS=Homo sapiens GN=HLA-DRB1 PE=1 SV=2 - [2B1F_HUMAN]	64.29	12	3	13	39	266	29.947	7.73779
	270	P31689	DnaJ homolog subfamily A member 1 OS=Homo sapiens GN=DNAJA1 PE=1 SV=2 - [DNJA1_HUMAN]	64.23	2	8	20	75	397	44.8395	7.07861
	271	P11413-3	Isoform 3 of Glucose-6-phosphate 1-dehydrogenase OS=Homo sapiens GN=G6PD - [G6PD_HUMAN]	64.22	3	9	30	127	545	62.4286	8.04541
	272	Q9UMQ6	Calpain-11 OS=Homo sapiens GN=CAPN11 PE=1 SV=2 - [CAN11_HUMAN]	64.14	1	1	27	69	739	84.3687	5.60498
	273	P63244	Guanine nucleotide-binding protein subunit beta-2-like 1 OS=Homo sapiens GN=GNB2L1 PE=1 SV=3 - [GBLP_HUMAN]	64.04	1	6	14	35	317	35.0546	7.69385
	274	O75083	WD repeat-containing protein 1 OS=Homo sapiens GN=WDR1 PE=1 SV=4 - [WDR1_HUMAN]	64.03	2	9	30	129	606	66.1519	6.65381
	275	Q9NRV9	Heme-binding protein 1 OS=Homo sapiens GN=HEBP1 PE=1 SV=1 - [HEBP1_HUMAN]	64.02	1	2	11	24	189	21.0835	5.79541
	276	P28072	Proteasome subunit beta type-6 OS=Homo sapiens GN=PSMB6 PE=1 SV=4 - [PSB6_HUMAN]	64.02	1	1	7	30	239	25.3414	4.91943
	277	O15144	Actin-related protein 2/3 complex subunit 2 OS=Homo sapiens GN=ARPC2 PE=1 SV=1 - [ARPC2_HUMAN]	64	1	4	15	41	300	34.3115	7.35693
	278	A6NKZ8	Putative tubulin beta chain-like protein ENSP00000290377 OS=Homo sapiens PE=5 SV=2 - [YI016_HUMAN]	63.98	1	1	18	76	372	41.7481	4.86865
	279	Q12846	Syntaxin-4 OS=Homo sapiens GN=STX4 PE=1 SV=2 - [STX4_HUMAN]	63.97	1	5	17	76	297	34.1589	6.27783
	280	P30101	Protein disulfide-isomerase A3 OS=Homo sapiens GN=PDIA3 PE=1 SV=4 - [PDIA3_HUMAN]	63.96	1	15	29	163	505	56.7468	6.354
	281	Q9H7V2	Synapse differentiation-inducing gene protein 1 OS=Homo sapiens GN=SYNDIG1 PE=2 SV=1 - [SYNG1_HUMAN]	63.95	1	1	9	19	258	28.533	4.88135
	282	P15374	Ubiquitin carboxyl-terminal hydrolase isozyme L3 OS=Homo sapiens GN=UCHL3 PE=1 SV=1 - [UCHL3_HUMAN]	63.91	1	1	9	24	230	26.166	4.91943
	283	P07900-2	Isoform 2 of Heat shock protein HSP 90-alpha OS=Homo sapiens GN=HSP90AA1 - [HS90A_HUMAN]	63.82	10	15	48	465	854	98.0995	5.16064
	284	P18206-2	Isoform 1 of Vinculin OS=Homo sapiens GN=VCL - [VINC_HUMAN]	63.79	3	13	65	206	1066	116.649	6.0874
	285	P06132	Uroporphyrinogen decarboxylase OS=Homo sapiens GN=UROD PE=1 SV=2 - [DCUP_HUMAN]	63.76	1	2	14	25	367	40.7608	6.13818
	286	P16949	Stathmin OS=Homo sapiens GN=STMN1 PE=1 SV=3 - [STMN1_HUMAN]	63.76	4	2	12	21	149	17.292	5.97314
	287	P20807-3	Isoform III of Calpain-3 OS=Homo sapiens GN=CAPN3 - [CAN3_HUMAN]	63.68	5	1	33	85	815	93.4521	5.85889
	288	P32189-2	Isoform 2 of Glycerol kinase OS=Homo sapiens GN=GK - [GLPK_HUMAN]	63.65	2	1	21	37	553	60.5537	6.31592
	289	P35222	Catenin beta-1 OS=Homo sapiens GN=CTNNB1 PE=1 SV=1 - [CTNB1_HUMAN]	63.64	3	8	35	101	781	85.4422	5.85889
	290	P63241-2	Isoform 2 of Eukaryotic translation initiation factor 5A-1 OS=Homo sapiens GN=EIF5A - [IF5A1_HUMAN]	63.59	3	3	10	107	184	20.1572	7.00537
	291	P17980	26S protease regulatory subunit 6A OS=Homo sapiens GN=PSMC3 PE=1 SV=3 - [PRS6A_HUMAN]	63.55	1	2	20	38	439	49.1725	5.23682
	292	P08123	Collagen alpha-2(I) chain OS=Homo sapiens GN=COL1A2 PE=1 SV=7 - [CO1A2_HUMAN]	63.47	1	11	58	188	1366	129.235	8.95361
	293	Q76G19	PDZ domain-containing protein 4 OS=Homo sapiens GN=PDZD4 PE=1 SV=1 - [PDZD4_HUMAN]	63.46	1	1	36	87	769	86.1173	6.12549
	294	P17677	Neuromodulin OS=Homo sapiens GN=GAP43 PE=1 SV=1 - [NEUM_HUMAN]	63.45	2	3	12	67	238	24.7879	4.71631
	295	P02794	Ferritin heavy chain OS=Homo sapiens GN=FTH1 PE=1 SV=2 - [FRIH_HUMAN]	63.39	1	8	12	86	183	21.2123	5.5542
	296	P61247	40S ribosomal protein S3a OS=Homo sapiens GN=RPS3A PE=1 SV=2 - [RS3A_HUMAN]	63.26	1	7	17	67	264	29.9257	9.72998
	297	P84243	Histone H3.3 OS=Homo sapiens GN=H3F3A PE=1 SV=2 - [H33_HUMAN]	63.24	5	4	10	56	136	15.3185	11.2681
	298	O00186	Syntaxin-binding protein 3 OS=Homo sapiens GN=STXBP3 PE=1 SV=2 - [STXB3_HUMAN]	63.18	1	10	34	94	592	67.7208	7.79639
	299	O43852-3	Isoform 3 of Calumenin OS=Homo sapiens GN=CALU - [CALU_HUMAN]	63.16	15	7	15	90	323	38.027	4.62744
	300	Q5JRA6	Melanoma inhibitory activity protein 3 OS=Homo sapiens GN=MIA3 PE=1 SV=1 - [MIA3_HUMAN]	63.14	3	2	76	141	1907	213.57	4.84326
	301	P31431	Syndecan-4 OS=Homo sapiens GN=SDC4 PE=1 SV=2 - [SDC4_HUMAN]	63.13	2	4	10	37	198	21.628	4.50049
	302	Q9Y230	RuvB-like 2 OS=Homo sapiens GN=RUVBL2 PE=1 SV=3 - [RUVB2_HUMAN]	63.07	1	2	24	87	463	51.1246	5.64307
	303	Q8WX92	Negative elongation factor B OS=Homo sapiens GN=NELFB PE=1 SV=1 - [NELFB_HUMAN]	62.93	1	1	29	65	580	65.6554	6.12549
	304	Q9H0U9	Testis-specific Y-encoded-like protein 1 OS=Homo sapiens GN=TSPYL1 PE=1 SV=3 - [TSYL1_HUMAN]	62.93	1	1	17	34	437	49.1618	5.45264
	305	P35579	Myosin-9 OS=Homo sapiens GN=MYH9 PE=1 SV=4 - [MYH9_HUMAN]	62.91	7	62	129	989	1960	226.392	5.60498
	306	P30040	Endoplasmic reticulum resident protein 29 OS=Homo sapiens GN=ERP29 PE=1 SV=4 - [ERP29_HUMAN]	62.84	1	2	10	22	261	28.9752	7.31299
	307	Q969P0	Immunoglobulin superfamily member 8 OS=Homo sapiens GN=IGSF8 PE=1 SV=1 - [IGSF8_HUMAN]	62.81	3	13	26	101	613	64.9935	8.00146
	308	P61764	Syntaxin-binding protein 1 OS=Homo sapiens GN=STXBP1 PE=1 SV=1 - [STXB1_HUMAN]	62.79	2	5	29	102	594	67.5259	6.96143
	309	Q7Z6J4	FYVE, RhoGEF and PH domain-containing protein 2 OS=Homo sapiens GN=FGD2 PE=2 SV=1 - [FGD2_HUMAN]	62.75	1	1	28	62	655	74.8448	6.93213
	310	Q16181	Septin-7 OS=Homo sapiens GN=SEPT7 PE=1 SV=2 - [SEPT7_HUMAN]	62.7	8	3	22	106	437	50.648	8.63135
	311	O43310-2	Isoform 2 of CBP80/20-dependent translation initiation factor OS=Homo sapiens GN=CTIF - [CTIF_HUMAN]	62.67	2	1	29	48	600	67.7405	6.53662
	312	P11908	Ribose-phosphate pyrophosphokinase 2 OS=Homo sapiens GN=PRPS2 PE=1 SV=2 - [PRPS2_HUMAN]	62.58	4	2	13	30	318	34.747	6.60986
	313	O60664-4	Isoform 4 of Perilipin-3 OS=Homo sapiens GN=PLIN3 - [PLIN3_HUMAN]	62.56	4	4	15	34	422	45.7752	5.42725
	314	P63000	Ras-related C3 botulinum toxin substrate 1 OS=Homo sapiens GN=RAC1 PE=1 SV=1 - [RAC1_HUMAN]	62.5	6	3	13	98	192	21.4362	8.49951
	315	P62241	40S ribosomal protein S8 OS=Homo sapiens GN=RPS8 PE=1 SV=2 - [RS8_HUMAN]	62.5	1	9	14	79	208	24.1902	10.3159
	316	O94876	Transmembrane and coiled-coil domains protein 1 OS=Homo sapiens GN=TMCC1 PE=1 SV=3 - [TMCC1_HUMAN]	62.48	2	2	26	43	653	72.0385	6.55127
	317	P56537	Eukaryotic translation initiation factor 6 OS=Homo sapiens GN=EIF6 PE=1 SV=1 - [IF6_HUMAN]	62.45	2	5	11	18	245	26.5822	4.67822
	318	P17858-2	Isoform 2 of 6-phosphofructokinase, liver type OS=Homo sapiens GN=PFKL - [K6PL_HUMAN]	62.39	2	1	34	75	827	90.1454	7.82568
	319	Q9NVJ2	ADP-ribosylation factor-like protein 8B OS=Homo sapiens GN=ARL8B PE=1 SV=1 - [ARL8B_HUMAN]	62.37	2	1	10	31	186	21.5251	8.42627
	320	Q9Y490	Talin-1 OS=Homo sapiens GN=TLN1 PE=1 SV=3 - [TLN1_HUMAN]	62.26	2	39	119	387	2541	269.599	6.07471
	321	P52907	F-actin-capping protein subunit alpha-1 OS=Homo sapiens GN=CAPZA1 PE=1 SV=3 - [CAZA1_HUMAN]	62.24	2	7	13	53	286	32.9023	5.69385
	322	P18669	Phosphoglycerate mutase 1 OS=Homo sapiens GN=PGAM1 PE=1 SV=2 - [PGAM1_HUMAN]	62.2	3	7	15	78	254	28.7858	7.18115
	323	Q9BW66-3	Isoform 3 of Cyclin-dependent kinase 2-interacting protein OS=Homo sapiens GN=CINP - [CINP_HUMAN]	62.11	3	1	9	10	227	26.0343	6.52197
	324	P05141	ADP/ATP translocase 2 OS=Homo sapiens GN=SLC25A5 PE=1 SV=7 - [ADT2_HUMAN]	62.08	4	3	16	52	298	32.8312	9.68604
	325	O15260	Surfeit locus protein 4 OS=Homo sapiens GN=SURF4 PE=1 SV=3 - [SURF4_HUMAN]	62.08	2	1	10	19	269	30.3738	7.78174
	326	P05023	Sodium/potassium-transporting ATPase subunit alpha-1 OS=Homo sapiens GN=ATP1A1 PE=1 SV=1 - [AT1A1_HUMAN]	62.07	6	23	62	483	1023	112.824	5.49072
	327	P12081-2	Isoform 2 of Histidine--tRNA ligase, cytoplasmic OS=Homo sapiens GN=HARS - [SYHC_HUMAN]	62.05	4	1	24	47	469	52.6868	5.52881
	328	Q04759	Protein kinase C theta type OS=Homo sapiens GN=PRKCQ PE=1 SV=3 - [KPCT_HUMAN]	61.9	2	1	31	67	706	81.8107	7.60596
	329	Q86W92-2	Isoform 2 of Liprin-beta-1 OS=Homo sapiens GN=PPFIBP1 - [LIPB1_HUMAN]	61.89	4	3	49	111	1005	113.11	5.66846
	330	Q8IZP0-2	Isoform 2 of Abl interactor 1 OS=Homo sapiens GN=ABI1 - [ABI1_HUMAN]	61.88	12	1	20	169	446	48.6482	6.87354
	331	Q8ND25-2	Isoform 2 of E3 ubiquitin-protein ligase ZNRF1 OS=Homo sapiens GN=ZNRF1 - [ZNRF1_HUMAN]	61.87	2	1	13	29	278	29.758	7.04932
	332	P07602	Proactivator polypeptide OS=Homo sapiens GN=PSAP PE=1 SV=2 - [SAP_HUMAN]	61.83	3	3	20	74	524	58.0739	5.17334
	333	Q9Y262-2	Isoform 2 of Eukaryotic translation initiation factor 3 subunit L OS=Homo sapiens GN=EIF3L - [EIF3L_HUMAN]	61.82	2	5	26	83	516	60.9747	7.03467
	334	Q14568	Putative heat shock protein HSP 90-alpha A2 OS=Homo sapiens GN=HSP90AA2 PE=1 SV=2 - [HS902_HUMAN]	61.81	2	1	15	116	343	39.3404	4.65283
	335	P29401-2	Isoform 2 of Transketolase OS=Homo sapiens GN=TKT - [TKT_HUMAN]	61.81	2	5	27	84	631	68.7701	7.51807
	336	Q9Y625	Glypican-6 OS=Homo sapiens GN=GPC6 PE=1 SV=1 - [GPC6_HUMAN]	61.8	1	3	22	61	555	62.6949	5.41455
	337	P68036-3	Isoform 3 of Ubiquitin-conjugating enzyme E2 L3 OS=Homo sapiens GN=UBE2L3 - [UB2L3_HUMAN]	61.79	3	3	9	16	212	23.9886	8.74854
	338	Q9P2W9	Syntaxin-18 OS=Homo sapiens GN=STX18 PE=1 SV=1 - [STX18_HUMAN]	61.79	1	1	16	22	335	38.6496	5.49072
	339	Q00325-2	Isoform B of Phosphate carrier protein, mitochondrial OS=Homo sapiens GN=SLC25A3 - [MPCP_HUMAN]	61.77	2	1	18	67	361	39.9326	9.36377
	340	Q9H223	EH domain-containing protein 4 OS=Homo sapiens GN=EHD4 PE=1 SV=1 - [EHD4_HUMAN]	61.74	1	4	23	44	541	61.1365	6.75635
	341	P54577	Tyrosine--tRNA ligase, cytoplasmic OS=Homo sapiens GN=YARS PE=1 SV=4 - [SYYC_HUMAN]	61.74	1	2	27	71	528	59.1061	7.04932
	342	Q9Y2A7-2	Isoform 2 of Nck-associated protein 1 OS=Homo sapiens GN=NCKAP1 - [NCKP1_HUMAN]	61.73	2	7	47	121	1134	129.433	6.68311
	343	P28838	Cytosol aminopeptidase OS=Homo sapiens GN=LAP3 PE=1 SV=3 - [AMPL_HUMAN]	61.66	2	1	26	55	519	56.1308	7.92822
	344	Q9BRX2	Protein pelota homolog OS=Homo sapiens GN=PELO PE=1 SV=2 - [PELO_HUMAN]	61.56	1	1	22	39	385	43.332	6.34131
	345	Q13509	Tubulin beta-3 chain OS=Homo sapiens GN=TUBB3 PE=1 SV=2 - [TBB3_HUMAN]	61.56	1	2	24	180	450	50.4003	4.93213
	346	P34932	Heat shock 70 kDa protein 4 OS=Homo sapiens GN=HSPA4 PE=1 SV=4 - [HSP74_HUMAN]	61.55	2	1	44	103	840	94.2712	5.18604
	347	Q96CW1-2	Isoform 2 of AP-2 complex subunit mu OS=Homo sapiens GN=AP2M1 - [AP2M1_HUMAN]	61.43	2	3	22	77	433	49.3579	9.53955
	348	A1A5D9	Bicaudal D-related protein 2 OS=Homo sapiens GN=CCDC64B PE=2 SV=2 - [BICR2_HUMAN]	61.42	2	1	28	87	508	56.8002	5.021
	349	P55072	Transitional endoplasmic reticulum ATPase OS=Homo sapiens GN=VCP PE=1 SV=4 - [TERA_HUMAN]	61.41	3	18	41	208	806	89.2657	5.26221
	350	Q01813	6-phosphofructokinase type C OS=Homo sapiens GN=PFKP PE=1 SV=2 - [K6PP_HUMAN]	61.35	2	13	38	141	784	85.5415	7.54736
	351	P22314	Ubiquitin-like modifier-activating enzyme 1 OS=Homo sapiens GN=UBA1 PE=1 SV=3 - [UBA1_HUMAN]	61.34	1	14	45	137	1058	117.774	5.75732
	352	O95847	Mitochondrial uncoupling protein 4 OS=Homo sapiens GN=SLC25A27 PE=1 SV=1 - [UCP4_HUMAN]	61.3	2	1	19	55	323	36.0406	9.0708
	353	P48509	CD151 antigen OS=Homo sapiens GN=CD151 PE=1 SV=3 - [CD151_HUMAN]	61.26	2	6	11	88	253	28.2763	7.47412
	354	P06748	Nucleophosmin OS=Homo sapiens GN=NPM1 PE=1 SV=2 - [NPM_HUMAN]	61.22	3	3	15	50	294	32.5548	4.77979
	355	Q9H340	Olfactory receptor 51B6 OS=Homo sapiens GN=OR51B6 PE=2 SV=2 - [O51B6_HUMAN]	61.22	1	1	11	31	312	35.2456	9.0415
	356	Q6ZVU0	Putative uncharacterized protein FLJ42102 OS=Homo sapiens PE=5 SV=1 - [YK022_HUMAN]	61.21	1	1	8	19	165	18.1561	8.79248
	357	O00339-3	Isoform 3 of Matrilin-2 OS=Homo sapiens GN=MATN2 - [MATN2_HUMAN]	61.2	3	1	31	65	915	102.165	6.18896
	358	Q03405	Urokinase plasminogen activator surface receptor OS=Homo sapiens GN=PLAUR PE=1 SV=1 - [UPAR_HUMAN]	61.19	3	2	12	19	335	36.9533	6.65381
	359	P62805	Histone H4 OS=Homo sapiens GN=HIST1H4A PE=1 SV=2 - [H4_HUMAN]	61.17	1	9	12	113	103	11.3604	11.356
	360	P67775	Serine/threonine-protein phosphatase 2A catalytic subunit alpha isoform OS=Homo sapiens GN=PPP2CA PE=1 SV=1 - [PP2AA_HUMAN]	61.17	3	4	15	43	309	35.5714	5.5415
	361	P49336-2	Isoform 2 of Cyclin-dependent kinase 8 OS=Homo sapiens GN=CDK8 - [CDK8_HUMAN]	61.12	2	1	22	58	463	53.1218	8.45557
	362	Q92932-3	Isoform 3 of Receptor-type tyrosine-protein phosphatase N2 OS=Homo sapiens GN=PTPRN2 - [PTPR2_HUMAN]	61.08	4	1	43	126	1038	114.288	5.64307
	363	O14672	Disintegrin and metalloproteinase domain-containing protein 10 OS=Homo sapiens GN=ADAM10 PE=1 SV=1 - [ADA10_HUMAN]	60.96	1	8	31	100	748	84.0877	7.76709
	364	P67936	Tropomyosin alpha-4 chain OS=Homo sapiens GN=TPM4 PE=1 SV=3 - [TPM4_HUMAN]	60.89	5	8	20	146	248	28.5045	4.69092
	365	P52209	6-phosphogluconate dehydrogenase, decarboxylating OS=Homo sapiens GN=PGD PE=1 SV=3 - [6PGD_HUMAN]	60.87	2	8	25	87	483	53.106	7.2251
	366	O75947	ATP synthase subunit d, mitochondrial OS=Homo sapiens GN=ATP5H PE=1 SV=3 - [ATP5H_HUMAN]	60.87	2	2	7	12	161	18.4795	5.30029
	367	P11021	78 kDa glucose-regulated protein OS=Homo sapiens GN=HSPA5 PE=1 SV=2 - [GRP78_HUMAN]	60.86	3	21	37	339	654	72.2884	5.16064
	368	P63151	Serine/threonine-protein phosphatase 2A 55 kDa regulatory subunit B alpha isoform OS=Homo sapiens GN=PPP2R2A PE=1 SV=1 - [2ABA_HUMAN]	60.85	10	4	20	45	447	51.6595	6.20166
	369	O75312	Zinc finger protein ZPR1 OS=Homo sapiens GN=ZNF259 PE=1 SV=1 - [ZPR1_HUMAN]	60.78	1	1	19	40	459	50.893	4.729
	370	P0C7P4	Putative cytochrome b-c1 complex subunit Rieske-like protein 1 OS=Homo sapiens GN=UQCRFS1P1 PE=5 SV=1 - [UCRIL_HUMAN]	60.78	1	1	10	15	283	30.7961	8.86572
	371	Q12965	Unconventional myosin-Ie OS=Homo sapiens GN=MYO1E PE=1 SV=2 - [MYO1E_HUMAN]	60.74	2	2	46	117	1108	126.982	8.92432
	372	Q49A17	Polypeptide N-acetylgalactosaminyltransferase-like 6 OS=Homo sapiens GN=GALNTL6 PE=2 SV=2 - [GLTL6_HUMAN]	60.73	2	1	26	90	601	69.7428	7.45947
	373	P63096	Guanine nucleotide-binding protein G(i) subunit alpha-1 OS=Homo sapiens GN=GNAI1 PE=1 SV=2 - [GNAI1_HUMAN]	60.73	5	2	19	163	354	40.3352	5.97314
	374	P28223-2	Isoform 2 of 5-hydroxytryptamine receptor 2A OS=Homo sapiens GN=HTR2A - [5HT2A_HUMAN]	60.72	1	1	13	18	387	43.9113	8.36768
	375	Q9Y6E0	Serine/threonine-protein kinase 24 OS=Homo sapiens GN=STK24 PE=1 SV=1 - [STK24_HUMAN]	60.72	3	3	24	58	443	49.2773	5.69385
	376	Q9H6S0	Probable ATP-dependent RNA helicase YTHDC2 OS=Homo sapiens GN=YTHDC2 PE=1 SV=2 - [YTDC2_HUMAN]	60.7	1	1	60	123	1430	160.147	8.39697
	377	P02786	Transferrin receptor protein 1 OS=Homo sapiens GN=TFRC PE=1 SV=2 - [TFR1_HUMAN]	60.66	1	12	32	148	760	84.8179	6.60986
	378	O43570-2	Isoform 2 of Carbonic anhydrase 12 OS=Homo sapiens GN=CA12 - [CAH12_HUMAN]	60.64	2	3	13	37	343	38.3835	7.2251
	379	Q02241	Kinesin-like protein KIF23 OS=Homo sapiens GN=KIF23 PE=1 SV=3 - [KIF23_HUMAN]	60.62	2	10	42	148	960	109.99	8.51416
	380	Q5JTZ9	Alanine--tRNA ligase, mitochondrial OS=Homo sapiens GN=AARS2 PE=1 SV=1 - [SYAM_HUMAN]	60.61	1	1	34	82	985	107.273	6.26514
	381	P59768	Guanine nucleotide-binding protein G(I)/G(S)/G(O) subunit gamma-2 OS=Homo sapiens GN=GNG2 PE=1 SV=2 - [GBG2_HUMAN]	60.56	1	1	4	10	71	7.84503	7.98682
	382	P48147	Prolyl endopeptidase OS=Homo sapiens GN=PREP PE=1 SV=2 - [PPCE_HUMAN]	60.56	1	1	27	47	710	80.648	5.85889
	383	P48736	Phosphatidylinositol 4,5-bisphosphate 3-kinase catalytic subunit gamma isoform OS=Homo sapiens GN=PIK3CG PE=1 SV=3 - [PK3CG_HUMAN]	60.53	1	1	48	108	1102	126.373	7.50342
	384	P23396	40S ribosomal protein S3 OS=Homo sapiens GN=RPS3 PE=1 SV=2 - [RS3_HUMAN]	60.49	2	7	15	49	243	26.6714	9.65674
	385	P00505	Aspartate aminotransferase, mitochondrial OS=Homo sapiens GN=GOT2 PE=1 SV=3 - [AATM_HUMAN]	60.47	1	2	19	43	430	47.4873	9.01221
	386	Q9UL12	Sarcosine dehydrogenase, mitochondrial OS=Homo sapiens GN=SARDH PE=1 SV=1 - [SARDH_HUMAN]	60.46	1	1	34	101	918	100.973	7.25439
	387	O43491-4	Isoform 4 of Band 4.1-like protein 2 OS=Homo sapiens GN=EPB41L2 - [E41L2_HUMAN]	60.45	6	1	47	157	852	95.4837	5.77002
	388	Q9H9E3	Conserved oligomeric Golgi complex subunit 4 OS=Homo sapiens GN=COG4 PE=1 SV=3 - [COG4_HUMAN]	60.38	2	1	38	94	785	89.0264	5.18604
	389	P09104	Gamma-enolase OS=Homo sapiens GN=ENO2 PE=1 SV=3 - [ENOG_HUMAN]	60.37	1	4	21	165	434	47.239	5.03369
	390	P62993	Growth factor receptor-bound protein 2 OS=Homo sapiens GN=GRB2 PE=1 SV=1 - [GRB2_HUMAN]	60.37	2	1	11	13	217	25.1904	6.31592
	391	O43829	Zinc finger and BTB domain-containing protein 14 OS=Homo sapiens GN=ZBTB14 PE=1 SV=2 - [ZBT14_HUMAN]	60.36	1	1	19	31	449	50.9237	6.03662
	392	Q16790	Carbonic anhydrase 9 OS=Homo sapiens GN=CA9 PE=1 SV=2 - [CAH9_HUMAN]	60.35	1	5	14	46	459	49.6671	4.71631
	393	O15231-6	Isoform 6 of Zinc finger protein 185 OS=Homo sapiens GN=ZNF185 - [ZN185_HUMAN]	60.33	7	1	26	40	721	76.8098	7.04932
	394	P62879	Guanine nucleotide-binding protein G(I)/G(S)/G(T) subunit beta-2 OS=Homo sapiens GN=GNB2 PE=1 SV=3 - [GBB2_HUMAN]	60.29	3	4	20	155	340	37.3071	5.99854
	395	Q9H9P8	L-2-hydroxyglutarate dehydrogenase, mitochondrial OS=Homo sapiens GN=L2HGDH PE=1 SV=3 - [L2HDH_HUMAN]	60.26	2	1	24	63	463	50.2839	8.14795
	396	Q9C0H5-2	Isoform 2 of Rho GTPase-activating protein 39 OS=Homo sapiens GN=ARHGAP39 - [RHG39_HUMAN]	60.14	2	2	53	137	1114	124.951	8.00146
	397	Q03135	Caveolin-1 OS=Homo sapiens GN=CAV1 PE=1 SV=4 - [CAV1_HUMAN]	60.11	3	3	9	39	178	20.4585	6.02393
	398	P15692-11	Isoform L-VEGF165 of Vascular endothelial growth factor A OS=Homo sapiens GN=VEGFA - [VEGFA_HUMAN]	60.11	9	2	19	49	371	40.7117	7.92822
	399	P61158	Actin-related protein 3 OS=Homo sapiens GN=ACTR3 PE=1 SV=3 - [ARP3_HUMAN]	60.05	5	5	15	50	418	47.341	5.88428
	400	P62195-2	Isoform 2 of 26S protease regulatory subunit 8 OS=Homo sapiens GN=PSMC5 - [PRS8_HUMAN]	60.05	2	4	20	66	398	44.7557	8.17725
	401	Q7L591-3	Isoform 3 of Docking protein 3 OS=Homo sapiens GN=DOK3 - [DOK3_HUMAN]	60	3	1	15	66	330	35.7121	8.60205
	402	Q12918	Killer cell lectin-like receptor subfamily B member 1 OS=Homo sapiens GN=KLRB1 PE=1 SV=1 - [KLRB1_HUMAN]	60	1	1	10	18	225	25.3988	6.32861
	403	Q9P2K5	Myelin expression factor 2 OS=Homo sapiens GN=MYEF2 PE=1 SV=3 - [MYEF2_HUMAN]	60	2	1	25	86	600	64.0805	8.74854
	404	P49411	Elongation factor Tu, mitochondrial OS=Homo sapiens GN=TUFM PE=1 SV=2 - [EFTU_HUMAN]	59.96	1	2	19	39	452	49.5102	7.60596
	405	Q5JUR7	Testis-expressed sequence 30 protein OS=Homo sapiens GN=TEX30 PE=2 SV=1 - [TEX30_HUMAN]	59.91	1	1	13	34	227	25.5681	8.66064
	406	Q14315	Filamin-C OS=Homo sapiens GN=FLNC PE=1 SV=3 - [FLNC_HUMAN]	59.89	2	45	127	580	2725	290.841	5.97314
	407	Q8NBH2-2	Isoform 2 of Kyphoscoliosis peptidase OS=Homo sapiens GN=KY - [KY_HUMAN]	59.89	1	1	15	43	369	41.787	8.95361
	408	P07384	Calpain-1 catalytic subunit OS=Homo sapiens GN=CAPN1 PE=1 SV=1 - [CAN1_HUMAN]	59.8	1	3	33	85	714	81.8382	5.66846
	409	Q06418	Tyrosine-protein kinase receptor TYRO3 OS=Homo sapiens GN=TYRO3 PE=1 SV=1 - [TYRO3_HUMAN]	59.78	1	2	28	54	890	96.8434	5.66846
	410	O95260-2	Isoform ATE1-2 of Arginyl-tRNA--protein transferase 1 OS=Homo sapiens GN=ATE1 - [ATE1_HUMAN]	59.65	2	1	21	54	518	58.994	7.02002
	411	P11766	Alcohol dehydrogenase class-3 OS=Homo sapiens GN=ADH5 PE=1 SV=4 - [ADHX_HUMAN]	59.63	1	1	13	34	374	39.6984	7.48877
	412	Q9H0B3-2	Isoform 2 of Uncharacterized protein KIAA1683 OS=Homo sapiens GN=KIAA1683 - [K1683_HUMAN]	59.57	1	1	25	100	554	60.9237	10.3892
	413	O15145	Actin-related protein 2/3 complex subunit 3 OS=Homo sapiens GN=ARPC3 PE=1 SV=3 - [ARPC3_HUMAN]	59.55	1	2	8	25	178	20.5334	8.5874
	414	Q6NZ67	Mitotic-spindle organizing protein 2B OS=Homo sapiens GN=MZT2B PE=1 SV=1 - [MZT2B_HUMAN]	59.49	1	1	7	25	158	16.2156	10.1548
	415	P17948	Vascular endothelial growth factor receptor 1 OS=Homo sapiens GN=FLT1 PE=1 SV=2 - [VGFR1_HUMAN]	59.49	17	1	59	154	1338	150.673	8.38232
	416	Q16555	Dihydropyrimidinase-related protein 2 OS=Homo sapiens GN=DPYSL2 PE=1 SV=1 - [DPYL2_HUMAN]	59.44	2	8	27	101	572	62.2546	6.37939
	417	Q8NET4	Retrotransposon gag domain-containing protein 1 OS=Homo sapiens GN=RGAG1 PE=1 SV=1 - [RGAG1_HUMAN]	59.44	1	1	64	269	1388	144.183	6.16357
	418	Q9Y272	Dexamethasone-induced Ras-related protein 1 OS=Homo sapiens GN=RASD1 PE=1 SV=1 - [RASD1_HUMAN]	59.43	2	1	16	38	281	31.6222	8.99756
	419	Q16585	Beta-sarcoglycan OS=Homo sapiens GN=SGCB PE=1 SV=1 - [SGCB_HUMAN]	59.43	1	1	10	19	318	34.7547	8.6167
	420	P62873	Guanine nucleotide-binding protein G(I)/G(S)/G(T) subunit beta-1 OS=Homo sapiens GN=GNB1 PE=1 SV=3 - [GBB1_HUMAN]	59.41	2	6	17	172	340	37.353	5.99854
	421	P26447	Protein S100-A4 OS=Homo sapiens GN=S100A4 PE=1 SV=1 - [S10A4_HUMAN]	59.41	1	1	5	10	101	11.7207	6.11279
	422	O75369-8	Isoform 8 of Filamin-B OS=Homo sapiens GN=FLNB - [FLNB_HUMAN]	59.4	9	18	111	387	2633	281.459	5.70654
	423	Q96AX1	Vacuolar protein sorting-associated protein 33A OS=Homo sapiens GN=VPS33A PE=1 SV=1 - [VP33A_HUMAN]	59.4	1	1	27	56	596	67.5682	6.96143
	424	P47897	Glutamine--tRNA ligase OS=Homo sapiens GN=QARS PE=1 SV=1 - [SYQ_HUMAN]	59.35	1	1	36	83	775	87.7429	7.15186
	425	Q15365	Poly(rC)-binding protein 1 OS=Homo sapiens GN=PCBP1 PE=1 SV=2 - [PCBP1_HUMAN]	59.27	1	3	15	49	356	37.4739	7.09326
	426	Q9Y617-2	Isoform 2 of Phosphoserine aminotransferase OS=Homo sapiens GN=PSAT1 - [SERC_HUMAN]	59.26	2	2	11	21	324	35.1661	6.68311
	427	O00410	Importin-5 OS=Homo sapiens GN=IPO5 PE=1 SV=4 - [IPO5_HUMAN]	59.25	3	6	44	126	1097	123.55	4.94482
	428	Q7Z3C6	Autophagy-related protein 9A OS=Homo sapiens GN=ATG9A PE=1 SV=3 - [ATG9A_HUMAN]	59.12	3	1	30	50	839	94.387	6.66846
	429	O14638	Ectonucleotide pyrophosphatase/phosphodiesterase family member 3 OS=Homo sapiens GN=ENPP3 PE=1 SV=2 - [ENPP3_HUMAN]	59.09	1	1	35	65	875	100.059	6.56592
	430	P62191	26S protease regulatory subunit 4 OS=Homo sapiens GN=PSMC1 PE=1 SV=1 - [PRS4_HUMAN]	59.09	1	3	21	68	440	49.1537	6.21436
	431	P61106	Ras-related protein Rab-14 OS=Homo sapiens GN=RAB14 PE=1 SV=4 - [RAB14_HUMAN]	59.07	16	4	11	45	215	23.8819	6.21436
	432	P29317	Ephrin type-A receptor 2 OS=Homo sapiens GN=EPHA2 PE=1 SV=2 - [EPHA2_HUMAN]	59.02	15	3	35	116	976	108.197	6.22705
	433	Q99576-4	Isoform 3 of TSC22 domain family protein 3 OS=Homo sapiens GN=TSC22D3 - [T22D3_HUMAN]	59.02	1	1	7	19	122	13.2778	4.76709
	434	Q9UBL9-7	Isoform K of P2X purinoceptor 2 OS=Homo sapiens GN=P2RX2 - [P2RX2_HUMAN]	58.92	2	1	13	35	370	41.3436	9.45166
	435	Q8N5L8	Ribonuclease P protein subunit p25-like protein OS=Homo sapiens GN=RPP25L PE=1 SV=1 - [RP25L_HUMAN]	58.9	1	1	9	41	163	17.6202	10.3013
	436	Q13838	Spliceosome RNA helicase DDX39B OS=Homo sapiens GN=DDX39B PE=1 SV=1 - [DX39B_HUMAN]	58.88	4	2	16	36	428	48.9599	5.66846
	437	P05120	Plasminogen activator inhibitor 2 OS=Homo sapiens GN=SERPINB2 PE=1 SV=2 - [PAI2_HUMAN]	58.8	1	1	16	36	415	46.5661	5.63037
	438	Q13705	Activin receptor type-2B OS=Homo sapiens GN=ACVR2B PE=1 SV=3 - [AVR2B_HUMAN]	58.79	1	1	18	57	512	57.6867	5.69385
	439	Q9NVM1	Protein eva-1 homolog B OS=Homo sapiens GN=EVA1B PE=1 SV=1 - [EVA1B_HUMAN]	58.79	1	1	5	7	165	18.3622	4.729
	440	Q13636	Ras-related protein Rab-31 OS=Homo sapiens GN=RAB31 PE=1 SV=1 - [RAB31_HUMAN]	58.76	2	3	9	38	194	21.5549	7.06396
	441	P04229	HLA class II histocompatibility antigen, DRB1-1 beta chain OS=Homo sapiens GN=HLA-DRB1 PE=1 SV=2 - [2B11_HUMAN]	58.65	9	1	8	28	266	29.895	7.69385
	442	P31150	Rab GDP dissociation inhibitor alpha OS=Homo sapiens GN=GDI1 PE=1 SV=2 - [GDIA_HUMAN]	58.61	1	1	21	87	447	50.5501	5.13525
	443	O15143	Actin-related protein 2/3 complex subunit 1B OS=Homo sapiens GN=ARPC1B PE=1 SV=3 - [ARC1B_HUMAN]	58.6	2	4	15	43	372	40.9234	8.35303
	444	Q13490	Baculoviral IAP repeat-containing protein 2 OS=Homo sapiens GN=BIRC2 PE=1 SV=2 - [BIRC2_HUMAN]	58.58	2	1	24	61	618	69.8543	6.69775
	445	P46779-3	Isoform 3 of 60S ribosomal protein L28 OS=Homo sapiens GN=RPL28 - [RL28_HUMAN]	58.58	5	2	8	40	169	19.1359	10.8286
	446	P29323-2	Isoform 2 of Ephrin type-B receptor 2 OS=Homo sapiens GN=EPHB2 - [EPHB2_HUMAN]	58.52	18	7	35	107	986	109.803	5.64307
	447	P55957-2	Isoform 2 of BH3-interacting domain death agonist OS=Homo sapiens GN=BID - [BID_HUMAN]	58.51	3	1	13	38	241	26.8194	7.07861
	448	Q9NZM1-6	Isoform 6 of Myoferlin OS=Homo sapiens GN=MYOF - [MYOF_HUMAN]	58.5	8	15	94	260	2048	233.329	6.21436
	449	Q8NE18	Putative methyltransferase NSUN7 OS=Homo sapiens GN=NSUN7 PE=2 SV=4 - [NSUN7_HUMAN]	58.5	1	1	31	113	718	80.9884	8.74854
	450	P61225	Ras-related protein Rap-2b OS=Homo sapiens GN=RAP2B PE=1 SV=1 - [RAP2B_HUMAN]	58.47	3	2	6	40	183	20.4912	4.80518
	451	Q96TA1	Niban-like protein 1 OS=Homo sapiens GN=FAM129B PE=1 SV=3 - [NIBL1_HUMAN]	58.45	2	10	36	120	746	84.0847	6.18896
	452	O75531	Barrier-to-autointegration factor OS=Homo sapiens GN=BANF1 PE=1 SV=1 - [BAF_HUMAN]	58.43	1	3	4	36	89	10.052	6.0874
	453	Q9H4M9	EH domain-containing protein 1 OS=Homo sapiens GN=EHD1 PE=1 SV=2 - [EHD1_HUMAN]	58.43	2	17	31	194	534	60.5887	6.82959
	454	P14625	Endoplasmin OS=Homo sapiens GN=HSP90B1 PE=1 SV=1 - [ENPL_HUMAN]	58.41	2	16	39	191	803	92.4113	4.84326
	455	Q9UN37	Vacuolar protein sorting-associated protein 4A OS=Homo sapiens GN=VPS4A PE=1 SV=1 - [VPS4A_HUMAN]	58.35	1	4	22	63	437	48.867	7.79639
	456	P0CG42	Putative protein FAM157B OS=Homo sapiens GN=FAM157B PE=3 SV=1 - [F157B_HUMAN]	58.33	1	1	17	28	384	43.1024	11.4146
	457	Q96JE9	Microtubule-associated protein 6 OS=Homo sapiens GN=MAP6 PE=1 SV=2 - [MAP6_HUMAN]	58.3	2	1	34	74	813	86.4518	9.15869
	458	O14786	Neuropilin-1 OS=Homo sapiens GN=NRP1 PE=1 SV=3 - [NRP1_HUMAN]	58.29	2	15	38	179	923	103.069	5.88428
	459	P20020-6	Isoform K of Plasma membrane calcium-transporting ATPase 1 OS=Homo sapiens GN=ATP2B1 - [AT2B1_HUMAN]	58.28	14	8	57	246	1184	130.535	5.96045
	460	A6NJR5	Putative speedy protein-like protein 3 OS=Homo sapiens PE=5 SV=3 - [SPDL3_HUMAN]	58.28	2	1	13	64	290	34.6765	6.37939
	461	O00303	Eukaryotic translation initiation factor 3 subunit F OS=Homo sapiens GN=EIF3F PE=1 SV=1 - [EIF3F_HUMAN]	58.26	1	5	15	47	357	37.5402	5.45264
	462	P62888	60S ribosomal protein L30 OS=Homo sapiens GN=RPL30 PE=1 SV=2 - [RL30_HUMAN]	58.26	1	4	5	19	115	12.7757	9.62744
	463	Q96FQ6	Protein S100-A16 OS=Homo sapiens GN=S100A16 PE=1 SV=1 - [S10AG_HUMAN]	58.25	1	2	6	36	103	11.794	6.78564
	464	Q92499	ATP-dependent RNA helicase DDX1 OS=Homo sapiens GN=DDX1 PE=1 SV=2 - [DDX1_HUMAN]	58.24	1	1	31	51	740	82.3798	7.2251
	465	Q13404-2	Isoform 2 of Ubiquitin-conjugating enzyme E2 variant 1 OS=Homo sapiens GN=UBE2V1 - [UB2V1_HUMAN]	58.24	7	1	9	32	170	19.2157	8.23584
	466	Q9UQN3	Charged multivesicular body protein 2b OS=Homo sapiens GN=CHMP2B PE=1 SV=1 - [CHM2B_HUMAN]	58.22	2	1	10	43	213	23.8912	8.76318
	467	O43491	Band 4.1-like protein 2 OS=Homo sapiens GN=EPB41L2 PE=1 SV=1 - [E41L2_HUMAN]	58.21	6	1	52	151	1005	112.519	5.43994
	468	P11586	C-1-tetrahydrofolate synthase, cytoplasmic OS=Homo sapiens GN=MTHFD1 PE=1 SV=3 - [C1TC_HUMAN]	58.18	1	12	42	105	935	101.495	7.29834
	469	P34897	Serine hydroxymethyltransferase, mitochondrial OS=Homo sapiens GN=SHMT2 PE=1 SV=3 - [GLYM_HUMAN]	58.13	3	1	18	45	504	55.9577	8.52881
	470	Q92743	Serine protease HTRA1 OS=Homo sapiens GN=HTRA1 PE=1 SV=1 - [HTRA1_HUMAN]	58.13	1	11	20	120	480	51.2546	7.82568
	471	O75351	Vacuolar protein sorting-associated protein 4B OS=Homo sapiens GN=VPS4B PE=1 SV=2 - [VPS4B_HUMAN]	58.11	1	2	21	48	444	49.2715	7.2251
	472	Q9P2B7	UPF0501 protein KIAA1430 OS=Homo sapiens GN=KIAA1430 PE=1 SV=2 - [K1430_HUMAN]	58.08	1	1	24	51	532	59.4389	9.05615
	473	P28482	Mitogen-activated protein kinase 1 OS=Homo sapiens GN=MAPK1 PE=1 SV=3 - [MK01_HUMAN]	58.06	14	2	14	38	360	41.3632	6.97607
	474	P30041	Peroxiredoxin-6 OS=Homo sapiens GN=PRDX6 PE=1 SV=3 - [PRDX6_HUMAN]	58.04	1	5	11	42	224	25.0192	6.37939
	475	Q13200	26S proteasome non-ATPase regulatory subunit 2 OS=Homo sapiens GN=PSMD2 PE=1 SV=3 - [PSMD2_HUMAN]	58.04	1	15	41	152	908	100.136	5.19873
	476	P38606	V-type proton ATPase catalytic subunit A OS=Homo sapiens GN=ATP6V1A PE=1 SV=2 - [VATA_HUMAN]	58.02	1	1	30	92	617	68.2605	5.51611
	477	Q9BW91-2	Isoform 2 of ADP-ribose pyrophosphatase, mitochondrial OS=Homo sapiens GN=NUDT9 - [NUDT9_HUMAN]	58	2	1	14	27	300	33.7548	6.75635
	478	Q14974	Importin subunit beta-1 OS=Homo sapiens GN=KPNB1 PE=1 SV=2 - [IMB1_HUMAN]	57.99	1	12	32	137	876	97.108	4.77979
	479	O60716-3	Isoform 1AC of Catenin delta-1 OS=Homo sapiens GN=CTNND1 - [CTND1_HUMAN]	57.83	32	11	46	136	939	104.912	6.87354
	480	Q9UL63	Muskelin OS=Homo sapiens GN=MKLN1 PE=1 SV=2 - [MKLN1_HUMAN]	57.82	2	2	34	73	735	84.7135	6.34131
	481	A1L1A6	Immunoglobulin superfamily member 23 OS=Homo sapiens GN=IGSF23 PE=2 SV=2 - [IGS23_HUMAN]	57.81	1	1	6	18	192	20.5776	6.58057
	482	Q9UKG9-3	Isoform 3 of Peroxisomal carnitine O-octanoyltransferase OS=Homo sapiens GN=CROT - [OCTC_HUMAN]	57.81	2	1	25	67	640	73.336	7.18115
	483	P28074	Proteasome subunit beta type-5 OS=Homo sapiens GN=PSMB5 PE=1 SV=3 - [PSB5_HUMAN]	57.79	3	2	12	37	263	28.4622	6.91748
	484	Q8WVM8	Sec1 family domain-containing protein 1 OS=Homo sapiens GN=SCFD1 PE=1 SV=4 - [SCFD1_HUMAN]	57.79	3	1	26	59	642	72.3341	6.26514
	485	P62910	60S ribosomal protein L32 OS=Homo sapiens GN=RPL32 PE=1 SV=2 - [RL32_HUMAN]	57.78	1	1	8	15	135	15.8498	11.3267
	486	Q6ZMI3	Gliomedin OS=Homo sapiens GN=GLDN PE=2 SV=1 - [GLDN_HUMAN]	57.71	2	1	22	73	551	58.9203	8.01611
	487	P55263-3	Isoform 3 of Adenosine kinase OS=Homo sapiens GN=ADK - [ADK_HUMAN]	57.7	4	1	11	22	305	34.0624	6.72705
	488	P52788	Spermine synthase OS=Homo sapiens GN=SMS PE=1 SV=2 - [SPSY_HUMAN]	57.65	2	3	11	25	366	41.2418	5.021
	489	O95235	Kinesin-like protein KIF20A OS=Homo sapiens GN=KIF20A PE=1 SV=1 - [KI20A_HUMAN]	57.64	1	1	34	97	890	100.215	6.91748
	490	A1KZ92	Peroxidasin-like protein OS=Homo sapiens GN=PXDNL PE=1 SV=3 - [PXDNL_HUMAN]	57.62	2	1	51	153	1463	163.582	7.43018
	491	P52789	Hexokinase-2 OS=Homo sapiens GN=HK2 PE=1 SV=2 - [HXK2_HUMAN]	57.58	1	3	36	103	917	102.313	6.04932
	492	P46783	40S ribosomal protein S10 OS=Homo sapiens GN=RPS10 PE=1 SV=1 - [RS10_HUMAN]	57.58	1	3	8	52	165	18.8859	10.1548
	493	Q9UNN8	Endothelial protein C receptor OS=Homo sapiens GN=PROCR PE=1 SV=1 - [EPCR_HUMAN]	57.56	1	2	6	40	238	26.6546	7.18115
	494	P43034	Platelet-activating factor acetylhydrolase IB subunit alpha OS=Homo sapiens GN=PAFAH1B1 PE=1 SV=2 - [LIS1_HUMAN]	57.56	2	3	18	50	410	46.6082	7.37158
	495	Q9BZX4	Ropporin-1B OS=Homo sapiens GN=ROPN1B PE=1 SV=1 - [ROP1B_HUMAN]	57.55	2	1	10	26	212	23.9483	5.14795
	496	P31930	Cytochrome b-c1 complex subunit 1, mitochondrial OS=Homo sapiens GN=UQCRC1 PE=1 SV=3 - [QCR1_HUMAN]	57.5	1	1	23	56	480	52.6124	6.3667
	497	P78356	Phosphatidylinositol 5-phosphate 4-kinase type-2 beta OS=Homo sapiens GN=PIP4K2B PE=1 SV=1 - [PI42B_HUMAN]	57.45	2	2	18	28	416	47.3478	7.32764
	498	Q9HBF4	Zinc finger FYVE domain-containing protein 1 OS=Homo sapiens GN=ZFYVE1 PE=1 SV=1 - [ZFYV1_HUMAN]	57.4	2	1	27	50	777	87.1198	7.41553
	499	P36578	60S ribosomal protein L4 OS=Homo sapiens GN=RPL4 PE=1 SV=5 - [RL4_HUMAN]	57.38	1	5	23	72	427	47.6674	11.063
	500	Q8WXI9	Transcriptional repressor p66-beta OS=Homo sapiens GN=GATAD2B PE=1 SV=1 - [P66B_HUMAN]	57.34	1	1	21	71	593	65.22	9.70068
	501	P62333	26S protease regulatory subunit 10B OS=Homo sapiens GN=PSMC6 PE=1 SV=1 - [PRS10_HUMAN]	57.33	1	1	19	46	389	44.1451	7.48877
	502	Q9UL46	Proteasome activator complex subunit 2 OS=Homo sapiens GN=PSME2 PE=1 SV=4 - [PSME2_HUMAN]	57.32	1	1	11	16	239	27.3843	5.73193
	503	Q14699	Raftlin OS=Homo sapiens GN=RFTN1 PE=1 SV=4 - [RFTN1_HUMAN]	57.27	1	8	23	82	578	63.1065	5.66846
	504	P19971	Thymidine phosphorylase OS=Homo sapiens GN=TYMP PE=1 SV=2 - [TYPH_HUMAN]	57.26	2	1	20	49	482	49.9242	5.52881
	505	Q9Y4E5-4	Isoform 3 of Zinc finger protein 451 OS=Homo sapiens GN=ZNF451 - [ZN451_HUMAN]	57.25	1	1	24	52	559	62.9813	5.66846
	506	P05121	Plasminogen activator inhibitor 1 OS=Homo sapiens GN=SERPINE1 PE=1 SV=1 - [PAI1_HUMAN]	57.21	2	2	14	40	402	45.031	7.1958
	507	P00387-3	Isoform 3 of NADH-cytochrome b5 reductase 3 OS=Homo sapiens GN=CYB5R3 - [NB5R3_HUMAN]	57.19	3	3	13	30	334	38.2016	6.90283
	508	P61769	Beta-2-microglobulin OS=Homo sapiens GN=B2M PE=1 SV=1 - [B2MG_HUMAN]	57.14	1	5	5	38	119	13.7059	6.52197
	509	O00154-5	Isoform 5 of Cytosolic acyl coenzyme A thioester hydrolase OS=Homo sapiens GN=ACOT7 - [BACH_HUMAN]	57.14	7	2	14	25	350	38.966	8.32373
	510	O00468-6	Isoform 6 of Agrin OS=Homo sapiens GN=AGRN - [AGRIN_HUMAN]	57.11	7	17	71	140	2045	214.706	6.40479
	511	Q2TAA5	GDP-Man:Man(3)GlcNAc(2)-PP-Dol alpha-1,2-mannosyltransferase OS=Homo sapiens GN=ALG11 PE=1 SV=2 - [ALG11_HUMAN]	57.11	1	1	15	22	492	55.6149	8.48486
	512	Q15005	Signal peptidase complex subunit 2 OS=Homo sapiens GN=SPCS2 PE=1 SV=3 - [SPCS2_HUMAN]	57.08	1	1	12	36	226	24.9867	8.47021
	513	Q658P3-3	Isoform 3 of Metalloreductase STEAP3 OS=Homo sapiens GN=STEAP3 - [STEA3_HUMAN]	57.08	4	7	22	115	487	54.4367	8.71924
	514	P40227	T-complex protein 1 subunit zeta OS=Homo sapiens GN=CCT6A PE=1 SV=3 - [TCPZ_HUMAN]	57.06	2	11	27	120	531	57.9876	6.68311
	515	P13667	Protein disulfide-isomerase A4 OS=Homo sapiens GN=PDIA4 PE=1 SV=2 - [PDIA4_HUMAN]	57.05	1	8	37	114	645	72.887	5.07178
	516	Q6IBS0	Twinfilin-2 OS=Homo sapiens GN=TWF2 PE=1 SV=2 - [TWF2_HUMAN]	57.02	1	1	15	26	349	39.5233	6.84424
	517	Q9NVI7-2	Isoform 2 of ATPase family AAA domain-containing protein 3A OS=Homo sapiens GN=ATAD3A - [ATD3A_HUMAN]	57	6	1	27	40	586	66.1772	9.24658
	518	Q15436	Protein transport protein Sec23A OS=Homo sapiens GN=SEC23A PE=1 SV=2 - [SC23A_HUMAN]	56.99	1	1	25	53	765	86.1053	7.07861
	519	P25705	ATP synthase subunit alpha, mitochondrial OS=Homo sapiens GN=ATP5A1 PE=1 SV=1 - [ATPA_HUMAN]	56.96	2	9	25	113	553	59.7136	9.12939
	520	Q15121	Astrocytic phosphoprotein PEA-15 OS=Homo sapiens GN=PEA15 PE=1 SV=2 - [PEA15_HUMAN]	56.92	1	2	6	15	130	15.0308	5.021
	521	P46060	Ran GTPase-activating protein 1 OS=Homo sapiens GN=RANGAP1 PE=1 SV=1 - [RAGP1_HUMAN]	56.9	1	7	26	67	587	63.5023	4.67822
	522	P61604	10 kDa heat shock protein, mitochondrial OS=Homo sapiens GN=HSPE1 PE=1 SV=2 - [CH10_HUMAN]	56.86	1	6	7	39	102	10.9249	8.92432
	523	Q86X52	Chondroitin sulfate synthase 1 OS=Homo sapiens GN=CHSY1 PE=1 SV=3 - [CHSS1_HUMAN]	56.86	1	1	35	83	802	91.7257	9.23193
	524	P46940	Ras GTPase-activating-like protein IQGAP1 OS=Homo sapiens GN=IQGAP1 PE=1 SV=1 - [IQGA1_HUMAN]	56.85	2	26	79	259	1657	189.134	6.48096
	525	Q9NRW3	DNA dC->dU-editing enzyme APOBEC-3C OS=Homo sapiens GN=APOBEC3C PE=1 SV=2 - [ABC3C_HUMAN]	56.84	1	1	8	19	190	22.811	7.59131
	526	Q15738	Sterol-4-alpha-carboxylate 3-dehydrogenase, decarboxylating OS=Homo sapiens GN=NSDHL PE=1 SV=2 - [NSDHL_HUMAN]	56.84	1	1	14	20	373	41.8736	8.06006
	527	P41250	Glycine--tRNA ligase OS=Homo sapiens GN=GARS PE=1 SV=3 - [SYG_HUMAN]	56.83	1	11	33	109	739	83.1126	7.03467
	528	Q1MX18	Protein inscuteable homolog OS=Homo sapiens GN=INSC PE=1 SV=1 - [INSC_HUMAN]	56.82	5	1	21	65	579	63.428	5.51611
	529	Q6ZQY3	Glutamate decarboxylase-like protein 1 OS=Homo sapiens GN=GADL1 PE=2 SV=4 - [GADL1_HUMAN]	56.81	1	1	23	52	521	59.2078	6.3667
	530	P30043	Flavin reductase (NADPH) OS=Homo sapiens GN=BLVRB PE=1 SV=3 - [BLVRB_HUMAN]	56.8	1	1	10	21	206	22.1054	7.6499
	531	P53004	Biliverdin reductase A OS=Homo sapiens GN=BLVRA PE=1 SV=2 - [BIEA_HUMAN]	56.76	1	2	12	30	296	33.4073	6.44287
	532	Q9Y4F1	FERM, RhoGEF and pleckstrin domain-containing protein 1 OS=Homo sapiens GN=FARP1 PE=1 SV=1 - [FARP1_HUMAN]	56.75	1	1	39	91	1045	118.559	8.14795
	533	P50454	Serpin H1 OS=Homo sapiens GN=SERPINH1 PE=1 SV=2 - [SERPH_HUMAN]	56.7	1	4	17	49	418	46.4112	8.68994
	534	Q9P0V3	SH3 domain-binding protein 4 OS=Homo sapiens GN=SH3BP4 PE=1 SV=1 - [SH3B4_HUMAN]	56.7	2	9	38	88	963	107.428	7.7085
	535	P09211	Glutathione S-transferase P OS=Homo sapiens GN=GSTP1 PE=1 SV=2 - [GSTP1_HUMAN]	56.67	1	2	11	36	210	23.341	5.64307
	536	Q96LB3	Intraflagellar transport protein 74 homolog OS=Homo sapiens GN=IFT74 PE=2 SV=1 - [IFT74_HUMAN]	56.67	1	1	27	62	600	69.1961	5.99854
	537	Q9H1P3	Oxysterol-binding protein-related protein 2 OS=Homo sapiens GN=OSBPL2 PE=1 SV=1 - [OSBL2_HUMAN]	56.67	2	1	14	45	480	55.1663	6.354
	538	Q01518	Adenylyl cyclase-associated protein 1 OS=Homo sapiens GN=CAP1 PE=1 SV=5 - [CAP1_HUMAN]	56.63	2	7	19	81	475	51.8687	8.06006
	539	Q9ULU8-3	Isoform 3 of Calcium-dependent secretion activator 1 OS=Homo sapiens GN=CADPS - [CAPS1_HUMAN]	56.62	4	1	48	129	1314	148.681	5.80811
	540	P08865	40S ribosomal protein SA OS=Homo sapiens GN=RPSA PE=1 SV=4 - [RSSA_HUMAN]	56.61	1	7	15	56	295	32.8334	4.86865
	541	P61978-3	Isoform 3 of Heterogeneous nuclear ribonucleoprotein K OS=Homo sapiens GN=HNRNPK - [HNRPK_HUMAN]	56.59	3	4	19	53	440	48.5322	5.5415
	542	P08476	Inhibin beta A chain OS=Homo sapiens GN=INHBA PE=1 SV=2 - [INHBA_HUMAN]	56.57	1	1	19	74	426	47.412	8.03076
	543	O94887	FERM, RhoGEF and pleckstrin domain-containing protein 2 OS=Homo sapiens GN=FARP2 PE=1 SV=3 - [FARP2_HUMAN]	56.55	2	1	43	94	1054	119.813	8.79248
	544	Q96AY3	Peptidyl-prolyl cis-trans isomerase FKBP10 OS=Homo sapiens GN=FKBP10 PE=1 SV=1 - [FKB10_HUMAN]	56.53	1	1	22	41	582	64.2042	5.61768
	545	P52926-4	Isoform 4 of High mobility group protein HMGI-C OS=Homo sapiens GN=HMGA2 - [HMGA2_HUMAN]	56.52	6	1	6	14	92	10.0573	11.8833
	546	P04843	Dolichyl-diphosphooligosaccharide--protein glycosyltransferase subunit 1 OS=Homo sapiens GN=RPN1 PE=1 SV=1 - [RPN1_HUMAN]	56.51	1	2	25	64	607	68.5268	6.37939
	547	P54578	Ubiquitin carboxyl-terminal hydrolase 14 OS=Homo sapiens GN=USP14 PE=1 SV=3 - [UBP14_HUMAN]	56.48	2	1	17	50	494	56.033	5.30029
	548	O94856-13	Isoform 13 of Neurofascin OS=Homo sapiens GN=NFASC - [NFASC_HUMAN]	56.47	12	1	50	85	1268	142.385	6.87354
	549	O15519	CASP8 and FADD-like apoptosis regulator OS=Homo sapiens GN=CFLAR PE=1 SV=1 - [CFLAR_HUMAN]	56.46	10	1	24	69	480	55.3087	8.00146
	550	P26639	Threonine--tRNA ligase, cytoplasmic OS=Homo sapiens GN=TARS PE=1 SV=3 - [SYTC_HUMAN]	56.43	2	4	32	94	723	83.3819	6.66846
	551	Q92598	Heat shock protein 105 kDa OS=Homo sapiens GN=HSPH1 PE=1 SV=1 - [HS105_HUMAN]	56.41	4	4	41	82	858	96.8037	5.38916
	552	O75771-5	Isoform 5 of DNA repair protein RAD51 homolog 4 OS=Homo sapiens GN=RAD51D - [RA51D_HUMAN]	56.4	4	1	12	19	328	35.1914	8.01611
	553	Q9NR63-3	Isoform 3 of Cytochrome P450 26B1 OS=Homo sapiens GN=CYP26B1 - [CP26B_HUMAN]	56.36	3	2	22	40	495	55.7203	9.0415
	554	P60983	Glia maturation factor beta OS=Homo sapiens GN=GMFB PE=1 SV=2 - [GMFB_HUMAN]	56.34	1	2	7	13	142	16.7025	5.2876
	555	P01903	HLA class II histocompatibility antigen, DR alpha chain OS=Homo sapiens GN=HLA-DRA PE=1 SV=1 - [DRA_HUMAN]	56.3	2	5	9	33	254	28.5887	4.99561
	556	Q13443	Disintegrin and metalloproteinase domain-containing protein 9 OS=Homo sapiens GN=ADAM9 PE=1 SV=1 - [ADAM9_HUMAN]	56.29	2	5	30	63	819	90.4971	7.51807
	557	Q8N4U5	T-complex protein 11-like protein 2 OS=Homo sapiens GN=TCP11L2 PE=2 SV=1 - [T11L2_HUMAN]	56.26	1	1	20	34	519	58.0545	4.95752
	558	P15153	Ras-related C3 botulinum toxin substrate 2 OS=Homo sapiens GN=RAC2 PE=1 SV=1 - [RAC2_HUMAN]	56.25	4	5	10	112	192	21.4151	7.60596
	559	Q96JP0	Protein fem-1 homolog C OS=Homo sapiens GN=FEM1C PE=2 SV=1 - [FEM1C_HUMAN]	56.24	1	1	25	45	617	68.6293	7.6792
	560	Q8NBU5	ATPase family AAA domain-containing protein 1 OS=Homo sapiens GN=ATAD1 PE=1 SV=1 - [ATAD1_HUMAN]	56.23	2	1	13	112	361	40.718	6.90283
	561	P13797	Plastin-3 OS=Homo sapiens GN=PLS3 PE=1 SV=4 - [PLST_HUMAN]	56.19	2	2	25	80	630	70.7662	5.60498
	562	Q15293	Reticulocalbin-1 OS=Homo sapiens GN=RCN1 PE=1 SV=1 - [RCN1_HUMAN]	56.19	1	8	15	62	331	38.8662	4.99561
	563	A2A288	Probable ribonuclease ZC3H12D OS=Homo sapiens GN=ZC3H12D PE=2 SV=3 - [ZC12D_HUMAN]	56.17	3	1	25	45	527	58.0417	8.67529
	564	P15735-2	Isoform 2 of Phosphorylase b kinase gamma catalytic chain, liver/testis isoform OS=Homo sapiens GN=PHKG2 - [PHKG2_HUMAN]	56.15	2	1	15	37	374	43.1301	7.18115
	565	P02765	Alpha-2-HS-glycoprotein OS=Homo sapiens GN=AHSG PE=1 SV=1 - [FETUA_HUMAN]	56.13	1	4	13	82	367	39.2997	5.71924
	566	P62745	Rho-related GTP-binding protein RhoB OS=Homo sapiens GN=RHOB PE=1 SV=1 - [RHOB_HUMAN]	56.12	1	1	9	51	196	22.1091	5.23682
	567	P0CG21	NHL-repeat-containing protein 4 OS=Homo sapiens GN=NHLRC4 PE=2 SV=1 - [NHLC4_HUMAN]	56.1	1	1	3	22	123	12.6233	4.88135
	568	A6NCM1	Putative IQ and AAA domain-containing protein 1-like OS=Homo sapiens GN=IQCA1P1 PE=5 SV=2 - [IQCAL_HUMAN]	56.06	1	1	38	104	817	94.871	9.24658
	569	O00159-3	Isoform 3 of Unconventional myosin-Ic OS=Homo sapiens GN=MYO1C - [MYO1C_HUMAN]	56.03	3	31	58	236	1044	119.554	9.45166
	570	O43242	26S proteasome non-ATPase regulatory subunit 3 OS=Homo sapiens GN=PSMD3 PE=1 SV=2 - [PSMD3_HUMAN]	55.99	1	6	27	59	534	60.9395	8.44092
	571	P05787-2	Isoform 2 of Keratin, type II cytoskeletal 8 OS=Homo sapiens GN=KRT8 - [K2C8_HUMAN]	55.97	20	1	24	95	511	56.5735	5.42725
	572	P27348	14-3-3 protein theta OS=Homo sapiens GN=YWHAQ PE=1 SV=1 - [1433T_HUMAN]	55.92	3	8	14	145	245	27.7468	4.77979
	573	Q14155-3	Isoform 3 of Rho guanine nucleotide exchange factor 7 OS=Homo sapiens GN=ARHGEF7 - [ARHG7_HUMAN]	55.88	6	1	28	57	782	87.7151	7.07861
	574	Q8N944	APC membrane recruitment protein 3 OS=Homo sapiens GN=AMER3 PE=2 SV=2 - [AMER3_HUMAN]	55.87	1	1	30	443	861	90.3883	5.69385
	575	Q7Z4N2-3	Isoform 3 of Transient receptor potential cation channel subfamily M member 1 OS=Homo sapiens GN=TRPM1 - [TRPM1_HUMAN]	55.85	5	2	63	195	1597	181.424	6.93213
	576	Q14697	Neutral alpha-glucosidase AB OS=Homo sapiens GN=GANAB PE=1 SV=3 - [GANAB_HUMAN]	55.83	2	13	36	107	944	106.807	6.13818
	577	P23526	Adenosylhomocysteinase OS=Homo sapiens GN=AHCY PE=1 SV=4 - [SAHH_HUMAN]	55.79	2	7	18	58	432	47.6852	6.34131
	578	Q02952	A-kinase anchor protein 12 OS=Homo sapiens GN=AKAP12 PE=1 SV=4 - [AKA12_HUMAN]	55.78	3	26	68	285	1782	191.367	4.41162
	579	O95294-4	Isoform 4 of RasGAP-activating-like protein 1 OS=Homo sapiens GN=RASAL1 - [RASL1_HUMAN]	55.78	4	1	29	77	805	90.0882	6.43018
	580	P13010	X-ray repair cross-complementing protein 5 OS=Homo sapiens GN=XRCC5 PE=1 SV=3 - [XRCC5_HUMAN]	55.74	1	2	31	87	732	82.6523	5.80811
	581	P43003-2	Isoform 2 of Excitatory amino acid transporter 1 OS=Homo sapiens GN=SLC1A3 - [EAA1_HUMAN]	55.73	2	1	17	29	497	55.1133	9.01221
	582	Q86UB9-2	Isoform 2 of Transmembrane protein 135 OS=Homo sapiens GN=TMEM135 - [TM135_HUMAN]	55.73	2	1	20	47	436	49.8809	9.40771
	583	P62829	60S ribosomal protein L23 OS=Homo sapiens GN=RPL23 PE=1 SV=1 - [RL23_HUMAN]	55.71	1	1	4	13	140	14.8561	10.5063
	584	A4D161	Protein FAM221A OS=Homo sapiens GN=FAM221A PE=2 SV=1 - [F221A_HUMAN]	55.7	1	1	13	77	298	33.061	6.7417
	585	Q96B86-2	Isoform 2 of Repulsive guidance molecule A OS=Homo sapiens GN=RGMA - [RGMA_HUMAN]	55.67	2	1	14	38	485	53.1135	8.14795
	586	Q9NX46	Poly(ADP-ribose) glycohydrolase ARH3 OS=Homo sapiens GN=ADPRHL2 PE=1 SV=1 - [ARHL2_HUMAN]	55.65	1	1	11	26	363	38.9222	5.07178
	587	Q96PB7	Noelin-3 OS=Homo sapiens GN=OLFM3 PE=2 SV=1 - [NOE3_HUMAN]	55.65	4	1	18	45	478	54.8945	8.14795
	588	P24821-4	Isoform 4 of Tenascin OS=Homo sapiens GN=TNC - [TENA_HUMAN]	55.64	6	37	86	359	2110	230.72	4.90674
	589	Q9UL68-2	Isoform 2 of Myelin transcription factor 1-like protein OS=Homo sapiens GN=MYT1L - [MYT1L_HUMAN]	55.57	4	1	48	117	1132	126.536	5.59229
	590	Q16401	26S proteasome non-ATPase regulatory subunit 5 OS=Homo sapiens GN=PSMD5 PE=1 SV=3 - [PSMD5_HUMAN]	55.56	2	2	17	27	504	56.1604	5.47803
	591	Q9UKV8-2	Isoform 2 of Protein argonaute-2 OS=Homo sapiens GN=AGO2 - [AGO2_HUMAN]	55.52	2	1	36	100	825	93.5601	9.26123
	592	Q7KZF4	Staphylococcal nuclease domain-containing protein 1 OS=Homo sapiens GN=SND1 PE=1 SV=1 - [SND1_HUMAN]	55.49	1	11	40	101	910	101.934	7.1665
	593	Q9UNE7	E3 ubiquitin-protein ligase CHIP OS=Homo sapiens GN=STUB1 PE=1 SV=2 - [CHIP_HUMAN]	55.45	2	1	15	36	303	34.8342	5.87158
	594	O95865	N(G),N(G)-dimethylarginine dimethylaminohydrolase 2 OS=Homo sapiens GN=DDAH2 PE=1 SV=1 - [DDAH2_HUMAN]	55.44	1	1	6	16	285	29.6255	6.01123
	595	P31948	Stress-induced-phosphoprotein 1 OS=Homo sapiens GN=STIP1 PE=1 SV=1 - [STIP1_HUMAN]	55.43	1	8	29	63	543	62.5994	6.80029
	596	P00918	Carbonic anhydrase 2 OS=Homo sapiens GN=CA2 PE=1 SV=2 - [CAH2_HUMAN]	55.38	1	1	10	28	260	29.2279	7.40088
	597	P05783	Keratin, type I cytoskeletal 18 OS=Homo sapiens GN=KRT18 PE=1 SV=2 - [K1C18_HUMAN]	55.35	1	1	16	55	430	48.0285	5.45264
	598	P20339	Ras-related protein Rab-5A OS=Homo sapiens GN=RAB5A PE=1 SV=2 - [RAB5A_HUMAN]	55.35	1	1	10	54	215	23.6438	8.14795
	599	O76041	Nebulette OS=Homo sapiens GN=NEBL PE=1 SV=1 - [NEBL_HUMAN]	55.33	2	1	48	112	1014	116.381	7.98682
	600	Q92974-3	Isoform 3 of Rho guanine nucleotide exchange factor 2 OS=Homo sapiens GN=ARHGEF2 - [ARHG2_HUMAN]	55.32	3	1	38	66	958	108.175	6.87354
	601	Q01082	Spectrin beta chain, non-erythrocytic 1 OS=Homo sapiens GN=SPTBN1 PE=1 SV=2 - [SPTB2_HUMAN]	55.29	3	2	104	257	2364	274.439	5.56689
	602	Q9H0A8	COMM domain-containing protein 4 OS=Homo sapiens GN=COMMD4 PE=1 SV=1 - [COMD4_HUMAN]	55.28	2	1	9	32	199	21.7503	7.31299
	603	Q9H6Z9	Egl nine homolog 3 OS=Homo sapiens GN=EGLN3 PE=1 SV=1 - [EGLN3_HUMAN]	55.23	1	1	10	15	239	27.2437	7.63525
	604	Q12959-3	Isoform 3 of Disks large homolog 1 OS=Homo sapiens GN=DLG1 - [DLG1_HUMAN]	55.22	9	5	28	75	871	97.0163	5.85889
	605	P48960	CD97 antigen OS=Homo sapiens GN=CD97 PE=1 SV=4 - [CD97_HUMAN]	55.21	3	6	25	76	835	91.8091	6.87354
	606	P68104	Elongation factor 1-alpha 1 OS=Homo sapiens GN=EEF1A1 PE=1 SV=1 - [EF1A1_HUMAN]	55.19	3	15	25	307	462	50.1091	9.01221
	607	P50479	PDZ and LIM domain protein 4 OS=Homo sapiens GN=PDLIM4 PE=1 SV=2 - [PDLI4_HUMAN]	55.15	2	1	11	16	330	35.3757	7.91357
	608	Q8N8B7-2	Isoform 2 of Transcription elongation factor A N-terminal and central domain-containing protein OS=Homo sapiens GN=TCEANC - [TEANC_HUMAN]	55.12	2	1	16	26	381	43.2578	8.86572
	609	P24534	Elongation factor 1-beta OS=Homo sapiens GN=EEF1B2 PE=1 SV=3 - [EF1B_HUMAN]	55.11	1	3	8	35	225	24.7483	4.66553
	610	Q03060-32	Isoform 29 of cAMP-responsive element modulator OS=Homo sapiens GN=CREM - [CREM_HUMAN]	55.08	28	1	7	26	236	26.2524	8.39697
	611	O14936	Peripheral plasma membrane protein CASK OS=Homo sapiens GN=CASK PE=1 SV=3 - [CSKP_HUMAN]	55.08	6	7	34	105	926	105.056	6.43018
	612	Q92930	Ras-related protein Rab-8B OS=Homo sapiens GN=RAB8B PE=1 SV=2 - [RAB8B_HUMAN]	55.07	18	2	13	95	207	23.5691	9.0708
	613	Q8NHU6	Tudor domain-containing protein 7 OS=Homo sapiens GN=TDRD7 PE=1 SV=2 - [TDRD7_HUMAN]	55.01	3	1	44	112	1098	123.506	7.21045
	614	Q96JJ3	Engulfment and cell motility protein 2 OS=Homo sapiens GN=ELMO2 PE=1 SV=2 - [ELMO2_HUMAN]	55	1	2	31	85	720	82.5623	5.89697
	615	P10451-5	Isoform 5 of Osteopontin OS=Homo sapiens GN=SPP1 - [OSTP_HUMAN]	55	5	6	13	97	300	33.8226	4.61475
	616	P25940	Collagen alpha-3(V) chain OS=Homo sapiens GN=COL5A3 PE=1 SV=3 - [CO5A3_HUMAN]	54.96	1	1	52	106	1745	172.016	6.87354
	617	P37235	Hippocalcin-like protein 1 OS=Homo sapiens GN=HPCAL1 PE=1 SV=3 - [HPCL1_HUMAN]	54.92	3	2	9	40	193	22.299	5.35107
	618	P05388	60S acidic ribosomal protein P0 OS=Homo sapiens GN=RPLP0 PE=1 SV=1 - [RLA0_HUMAN]	54.89	2	6	12	68	317	34.2518	5.97314
	619	O15067	Phosphoribosylformylglycinamidine synthase OS=Homo sapiens GN=PFAS PE=1 SV=4 - [PUR4_HUMAN]	54.86	1	1	47	110	1338	144.643	5.75732
	620	Q8NBS9	Thioredoxin domain-containing protein 5 OS=Homo sapiens GN=TXNDC5 PE=1 SV=2 - [TXND5_HUMAN]	54.86	2	3	14	37	432	47.5987	5.97314
	621	O15372	Eukaryotic translation initiation factor 3 subunit H OS=Homo sapiens GN=EIF3H PE=1 SV=1 - [EIF3H_HUMAN]	54.83	1	2	13	30	352	39.9051	6.53662
	622	Q9NUU7	ATP-dependent RNA helicase DDX19A OS=Homo sapiens GN=DDX19A PE=1 SV=1 - [DD19A_HUMAN]	54.81	5	1	22	57	478	53.9408	6.58057
	623	Q86TB9	Protein PAT1 homolog 1 OS=Homo sapiens GN=PATL1 PE=1 SV=2 - [PATL1_HUMAN]	54.81	2	1	26	70	770	86.7956	6.66846
	624	Q9NQY0-2	Isoform 2 of Bridging integrator 3 OS=Homo sapiens GN=BIN3 - [BIN3_HUMAN]	54.77	2	1	8	19	199	23.2039	6.25244
	625	Q16658	Fascin OS=Homo sapiens GN=FSCN1 PE=1 SV=3 - [FSCN1_HUMAN]	54.77	1	6	17	55	493	54.4961	7.23975
	626	Q702N8	Xin actin-binding repeat-containing protein 1 OS=Homo sapiens GN=XIRP1 PE=1 SV=1 - [XIRP1_HUMAN]	54.69	2	1	66	125	1843	198.439	6.15088
	627	P38646	Stress-70 protein, mitochondrial OS=Homo sapiens GN=HSPA9 PE=1 SV=2 - [GRP75_HUMAN]	54.64	1	10	38	144	679	73.6348	6.16357
	628	Q86UR5	Regulating synaptic membrane exocytosis protein 1 OS=Homo sapiens GN=RIMS1 PE=1 SV=1 - [RIMS1_HUMAN]	54.61	13	1	69	182	1692	188.956	9.65674
	629	Q9Y5Z6	Beta-1,3-galactosyltransferase 1 OS=Homo sapiens GN=B3GALT1 PE=2 SV=1 - [B3GT1_HUMAN]	54.6	1	1	11	35	326	37.9684	9.29053
	630	Q5VTB9	E3 ubiquitin-protein ligase RNF220 OS=Homo sapiens GN=RNF220 PE=1 SV=1 - [RN220_HUMAN]	54.59	1	1	19	47	566	62.7255	6.03662
	631	O60774	Putative dimethylaniline monooxygenase [N-oxide-forming] 6 OS=Homo sapiens GN=FMO6P PE=5 SV=1 - [FMO6_HUMAN]	54.55	1	1	23	42	539	61.2516	6.39209
	632	O95372	Acyl-protein thioesterase 2 OS=Homo sapiens GN=LYPLA2 PE=1 SV=1 - [LYPA2_HUMAN]	54.55	1	1	9	29	231	24.7207	7.2251
	633	P32119	Peroxiredoxin-2 OS=Homo sapiens GN=PRDX2 PE=1 SV=5 - [PRDX2_HUMAN]	54.55	1	3	8	24	198	21.8782	5.97314
	634	P43686	26S protease regulatory subunit 6B OS=Homo sapiens GN=PSMC4 PE=1 SV=2 - [PRS6B_HUMAN]	54.55	2	8	16	43	418	47.3365	5.21143
	635	Q15019-2	Isoform 2 of Septin-2 OS=Homo sapiens GN=SEPT2 - [SEPT2_HUMAN]	54.55	2	5	16	37	396	45.4322	6.88818
	636	P61163	Alpha-centractin OS=Homo sapiens GN=ACTR1A PE=1 SV=1 - [ACTZ_HUMAN]	54.52	2	5	12	37	376	42.5869	6.63916
	637	Q6IN85-2	Isoform 2 of Serine/threonine-protein phosphatase 4 regulatory subunit 3A OS=Homo sapiens GN=SMEK1 - [P4R3A_HUMAN]	54.51	3	1	30	84	820	93.8371	4.89404
	638	P35998	26S protease regulatory subunit 7 OS=Homo sapiens GN=PSMC2 PE=1 SV=3 - [PRS7_HUMAN]	54.5	1	11	22	55	433	48.6031	5.94775
	639	P40925	Malate dehydrogenase, cytoplasmic OS=Homo sapiens GN=MDH1 PE=1 SV=4 - [MDHC_HUMAN]	54.49	3	5	11	32	334	36.403	7.35693
	640	Q92692-2	Isoform Alpha of Poliovirus receptor-related protein 2 OS=Homo sapiens GN=PVRL2 - [PVRL2_HUMAN]	54.49	2	4	16	41	479	51.3272	5.10986
	641	Q02790	Peptidyl-prolyl cis-trans isomerase FKBP4 OS=Homo sapiens GN=FKBP4 PE=1 SV=3 - [FKBP4_HUMAN]	54.47	1	3	23	50	459	51.7721	5.42725
	642	Q99460	26S proteasome non-ATPase regulatory subunit 1 OS=Homo sapiens GN=PSMD1 PE=1 SV=2 - [PSMD1_HUMAN]	54.46	2	2	40	95	953	105.769	5.38916
	643	O15020	Spectrin beta chain, non-erythrocytic 2 OS=Homo sapiens GN=SPTBN2 PE=1 SV=3 - [SPTN2_HUMAN]	54.44	2	2	103	280	2390	271.157	6.11279
	644	A6NHL2-2	Isoform 2 of Tubulin alpha chain-like 3 OS=Homo sapiens GN=TUBAL3 - [TBAL3_HUMAN]	54.43	2	2	17	49	406	45.4886	6.31592
	645	Q9HAW0	Transcription factor IIIB 50 kDa subunit OS=Homo sapiens GN=BRF2 PE=1 SV=1 - [BRF2_HUMAN]	54.42	1	1	13	19	419	46.5037	7.94287
	646	Q86UP0-2	Isoform 2 of Cadherin-24 OS=Homo sapiens GN=CDH24 - [CAD24_HUMAN]	54.42	2	1	22	43	781	83.7241	4.77979
	647	Q9UL49-1	Isoform 1 of Transcription factor-like 5 protein OS=Homo sapiens GN=TCFL5 - [TCFL5_HUMAN]	54.42	2	1	13	36	452	48.2331	8.17725
	648	Q96AC1	Fermitin family homolog 2 OS=Homo sapiens GN=FERMT2 PE=1 SV=1 - [FERM2_HUMAN]	54.41	3	1	27	88	680	77.8106	6.69775
	649	Q6ZTY8	Putative uncharacterized protein C12orf63 OS=Homo sapiens GN=C12orf63 PE=2 SV=2 - [CL063_HUMAN]	54.39	1	1	37	58	1197	135.7	8.03076
	650	O00444-2	Isoform 2 of Serine/threonine-protein kinase PLK4 OS=Homo sapiens GN=PLK4 - [PLK4_HUMAN]	54.37	3	1	36	148	938	105.187	8.47021
	651	O43291-2	Isoform 2 of Kunitz-type protease inhibitor 2 OS=Homo sapiens GN=SPINT2 - [SPIT2_HUMAN]	54.36	2	1	7	13	195	21.8139	8.38232
	652	P61289	Proteasome activator complex subunit 3 OS=Homo sapiens GN=PSME3 PE=1 SV=1 - [PSME3_HUMAN]	54.33	2	1	11	22	254	29.4876	5.94775
	653	P05198	Eukaryotic translation initiation factor 2 subunit 1 OS=Homo sapiens GN=EIF2S1 PE=1 SV=3 - [IF2A_HUMAN]	54.29	1	4	15	50	315	36.0894	5.08447
	654	Q6IEZ7	Olfactory receptor 2T5 OS=Homo sapiens GN=OR2T5 PE=2 SV=1 - [OR2T5_HUMAN]	54.29	2	1	9	22	315	35.5703	8.39697
	655	Q9Y250-2	Isoform 2 of Leucine zipper putative tumor suppressor 1 OS=Homo sapiens GN=LZTS1 - [LZTS1_HUMAN]	54.28	6	1	23	50	573	63.7946	7.18115
	656	O95819-5	Isoform 5 of Mitogen-activated protein kinase kinase kinase kinase 4 OS=Homo sapiens GN=MAP4K4 - [M4K4_HUMAN]	54.27	18	4	43	128	1242	141.841	7.66455
	657	O75469-3	Isoform 1C of Nuclear receptor subfamily 1 group I member 2 OS=Homo sapiens GN=NR1I2 - [NR1I2_HUMAN]	54.27	2	1	19	64	457	52.0952	8.35303
	658	Q07912-3	Isoform 3 of Activated CDC42 kinase 1 OS=Homo sapiens GN=TNK2 - [ACK1_HUMAN]	54.24	2	1	45	87	1086	119.274	7.66455
	659	Q13064	Probable E3 ubiquitin-protein ligase makorin-3 OS=Homo sapiens GN=MKRN3 PE=1 SV=1 - [MKRN3_HUMAN]	54.24	1	1	21	80	507	55.6087	5.73193
	660	P13726	Tissue factor OS=Homo sapiens GN=F3 PE=1 SV=1 - [TF_HUMAN]	54.24	2	3	10	37	295	33.0468	7.03467
	661	Q14019	Coactosin-like protein OS=Homo sapiens GN=COTL1 PE=1 SV=3 - [COTL1_HUMAN]	54.23	1	4	7	24	142	15.935	5.66846
	662	P23634-7	Isoform ZB of Plasma membrane calcium-transporting ATPase 4 OS=Homo sapiens GN=ATP2B4 - [AT2B4_HUMAN]	54.07	12	15	53	249	1193	132.51	6.21436
	663	O43283	Mitogen-activated protein kinase kinase kinase 13 OS=Homo sapiens GN=MAP3K13 PE=1 SV=1 - [M3K13_HUMAN]	54.04	3	1	38	93	966	108.228	6.49365
	664	A1L167	Ubiquitin-conjugating enzyme E2Q-like protein 1 OS=Homo sapiens GN=UBE2QL1 PE=2 SV=2 - [U2QL1_HUMAN]	54.04	1	1	6	8	161	18.3264	7.95752
	665	Q9Y5Q8-2	Isoform 2 of General transcription factor 3C polypeptide 5 OS=Homo sapiens GN=GTF3C5 - [TF3C5_HUMAN]	54.03	3	1	21	52	509	58.2294	6.62451
	666	Q16769	Glutaminyl-peptide cyclotransferase OS=Homo sapiens GN=QPCT PE=1 SV=1 - [QPCT_HUMAN]	54.02	2	1	10	24	361	40.8508	6.60986
	667	Q92796	Disks large homolog 3 OS=Homo sapiens GN=DLG3 PE=1 SV=2 - [DLG3_HUMAN]	53.98	2	1	29	73	817	90.2576	7.03467
	668	P05129	Protein kinase C gamma type OS=Homo sapiens GN=PRKCG PE=1 SV=3 - [KPCG_HUMAN]	53.95	1	1	23	45	697	78.3972	7.45947
	669	P61020	Ras-related protein Rab-5B OS=Homo sapiens GN=RAB5B PE=1 SV=1 - [RAB5B_HUMAN]	53.95	2	1	8	44	215	23.6919	8.1333
	670	P48426	Phosphatidylinositol 5-phosphate 4-kinase type-2 alpha OS=Homo sapiens GN=PIP4K2A PE=1 SV=2 - [PI42A_HUMAN]	53.94	1	1	19	37	406	46.1955	6.99072
	671	Q14832	Metabotropic glutamate receptor 3 OS=Homo sapiens GN=GRM3 PE=1 SV=2 - [GRM3_HUMAN]	53.92	2	1	29	52	879	98.8147	7.66455
	672	P13637	Sodium/potassium-transporting ATPase subunit alpha-3 OS=Homo sapiens GN=ATP1A3 PE=1 SV=3 - [AT1A3_HUMAN]	53.9	5	1	44	221	1013	111.677	5.37646
	673	O15327	Type II inositol 3,4-bisphosphate 4-phosphatase OS=Homo sapiens GN=INPP4B PE=2 SV=4 - [INP4B_HUMAN]	53.9	1	1	35	84	924	104.671	6.26514
	674	P20290	Transcription factor BTF3 OS=Homo sapiens GN=BTF3 PE=1 SV=1 - [BTF3_HUMAN]	53.88	2	1	7	18	206	22.1544	9.37842
	675	Q68DA7-5	Isoform 5 of Formin-1 OS=Homo sapiens GN=FMN1 - [FMN1_HUMAN]	53.85	2	1	48	90	1196	132.074	5.66846
	676	O95433	Activator of 90 kDa heat shock protein ATPase homolog 1 OS=Homo sapiens GN=AHSA1 PE=1 SV=1 - [AHSA1_HUMAN]	53.85	1	2	16	38	338	38.2503	5.52881
	677	Q9Y3E7-3	Isoform 3 of Charged multivesicular body protein 3 OS=Homo sapiens GN=CHMP3 - [CHMP3_HUMAN]	53.78	3	1	10	34	251	28.3681	4.76709
	678	Q9H081	Protein MIS12 homolog OS=Homo sapiens GN=MIS12 PE=1 SV=1 - [MIS12_HUMAN]	53.66	1	1	9	20	205	24.1243	5.69385
	679	P20585	DNA mismatch repair protein Msh3 OS=Homo sapiens GN=MSH3 PE=1 SV=4 - [MSH3_HUMAN]	53.65	1	1	48	133	1137	127.332	8.01611
	680	Q9NZN4	EH domain-containing protein 2 OS=Homo sapiens GN=EHD2 PE=1 SV=2 - [EHD2_HUMAN]	53.59	1	7	26	109	543	61.1227	6.45557
	681	Q9H361	Polyadenylate-binding protein 3 OS=Homo sapiens GN=PABPC3 PE=1 SV=2 - [PABP3_HUMAN]	53.57	2	1	24	84	631	69.9867	9.67139
	682	P51955-4	Isoform 4 of Serine/threonine-protein kinase Nek2 OS=Homo sapiens GN=NEK2 - [NEK2_HUMAN]	53.55	13	1	17	52	437	50.8775	8.98291
	683	O43426	Synaptojanin-1 OS=Homo sapiens GN=SYNJ1 PE=1 SV=2 - [SYNJ1_HUMAN]	53.53	4	1	58	151	1573	172.995	7.41553
	684	P12956	X-ray repair cross-complementing protein 6 OS=Homo sapiens GN=XRCC6 PE=1 SV=2 - [XRCC6_HUMAN]	53.53	1	5	26	94	609	69.7991	6.63916
	685	Q9NTJ4-2	Isoform 2 of Alpha-mannosidase 2C1 OS=Homo sapiens GN=MAN2C1 - [MA2C1_HUMAN]	53.49	4	1	32	76	1017	113.388	6.60986
	686	P40121	Macrophage-capping protein OS=Homo sapiens GN=CAPG PE=1 SV=2 - [CAPG_HUMAN]	53.45	2	3	9	28	348	38.4745	6.18896
	687	P55209	Nucleosome assembly protein 1-like 1 OS=Homo sapiens GN=NAP1L1 PE=1 SV=1 - [NP1L1_HUMAN]	53.45	1	2	14	50	391	45.3459	4.4624
	688	Q13155	Aminoacyl tRNA synthase complex-interacting multifunctional protein 2 OS=Homo sapiens GN=AIMP2 PE=1 SV=2 - [AIMP2_HUMAN]	53.44	1	1	12	27	320	35.3263	8.22119
	689	O15031	Plexin-B2 OS=Homo sapiens GN=PLXNB2 PE=1 SV=3 - [PLXB2_HUMAN]	53.43	3	14	61	167	1838	204.997	6.23975
	690	Q86VE9	Serine incorporator 5 OS=Homo sapiens GN=SERINC5 PE=2 SV=1 - [SERC5_HUMAN]	53.43	4	2	15	22	423	46.9772	7.62061
	691	Q6ZMW3-2	Isoform 2 of Echinoderm microtubule-associated protein-like 6 OS=Homo sapiens GN=EML6 - [EMAL6_HUMAN]	53.42	2	1	71	178	1874	208.672	7.85498
	692	P61326	Protein mago nashi homolog OS=Homo sapiens GN=MAGOH PE=1 SV=1 - [MGN_HUMAN]	53.42	2	1	7	15	146	17.1528	6.11279
	693	Q14156-3	Isoform 3 of Protein EFR3 homolog A OS=Homo sapiens GN=EFR3A - [EFR3A_HUMAN]	53.41	3	2	33	77	777	87.5241	6.60986
	694	O15554	Intermediate conductance calcium-activated potassium channel protein 4 OS=Homo sapiens GN=KCNN4 PE=1 SV=1 - [KCNN4_HUMAN]	53.4	1	1	18	75	427	47.6646	9.83252
	695	Q6XUX3-2	Isoform 2 of Dual serine/threonine and tyrosine protein kinase OS=Homo sapiens GN=DSTYK - [DUSTY_HUMAN]	53.39	1	1	36	74	884	99.9041	6.66846
	696	Q9P246	Stromal interaction molecule 2 OS=Homo sapiens GN=STIM2 PE=1 SV=2 - [STIM2_HUMAN]	53.35	1	1	24	69	746	83.9182	6.75635
	697	P49327	Fatty acid synthase OS=Homo sapiens GN=FASN PE=1 SV=3 - [FAS_HUMAN]	53.33	2	21	99	264	2511	273.254	6.44287
	698	P0CW22	40S ribosomal protein S17-like OS=Homo sapiens GN=RPS17L PE=1 SV=1 - [RS17L_HUMAN]	53.33	1	1	5	8	135	15.5404	9.84717
	699	P48382	DNA-binding protein RFX5 OS=Homo sapiens GN=RFX5 PE=1 SV=1 - [RFX5_HUMAN]	53.25	1	1	26	140	616	65.2829	9.29053
	700	P27797	Calreticulin OS=Homo sapiens GN=CALR PE=1 SV=1 - [CALR_HUMAN]	53.24	1	11	20	165	417	48.1118	4.43701
	701	O95817	BAG family molecular chaperone regulator 3 OS=Homo sapiens GN=BAG3 PE=1 SV=3 - [BAG3_HUMAN]	53.22	1	1	17	25	575	61.5569	6.94678
	702	Q8TAM6-2	Isoform 2 of Ermin OS=Homo sapiens GN=ERMN - [ERMIN_HUMAN]	53.2	2	1	11	30	297	34.2796	4.91943
	703	P23786	Carnitine O-palmitoyltransferase 2, mitochondrial OS=Homo sapiens GN=CPT2 PE=1 SV=2 - [CPT2_HUMAN]	53.19	1	1	28	73	658	73.7304	8.17725
	704	P10515	Dihydrolipoyllysine-residue acetyltransferase component of pyruvate dehydrogenase complex, mitochondrial OS=Homo sapiens GN=DLAT PE=1 SV=3 - [ODP2_HUMAN]	53.17	1	1	21	66	647	68.9531	7.84033
	705	Q9UGM5	Fetuin-B OS=Homo sapiens GN=FETUB PE=1 SV=2 - [FETUB_HUMAN]	53.14	2	1	13	33	382	42.028	6.82959
	706	Q7L985	Leucine-rich repeat and immunoglobulin-like domain-containing nogo receptor-interacting protein 2 OS=Homo sapiens GN=LINGO2 PE=1 SV=1 - [LIGO2_HUMAN]	53.14	1	1	19	27	606	68.0223	8.1333
	707	P12268	Inosine-5'-monophosphate dehydrogenase 2 OS=Homo sapiens GN=IMPDH2 PE=1 SV=2 - [IMDH2_HUMAN]	53.11	8	12	20	68	514	55.7696	6.90283
	708	Q9Y6N5	Sulfide:quinone oxidoreductase, mitochondrial OS=Homo sapiens GN=SQRDL PE=1 SV=1 - [SQRD_HUMAN]	53.11	1	1	23	52	450	49.9289	9.11475
	709	P26373	60S ribosomal protein L13 OS=Homo sapiens GN=RPL13 PE=1 SV=4 - [RL13_HUMAN]	53.08	2	3	13	66	211	24.2465	11.6489
	710	Q13813	Spectrin alpha chain, non-erythrocytic 1 OS=Homo sapiens GN=SPTAN1 PE=1 SV=3 - [SPTN1_HUMAN]	53.07	3	4	104	232	2472	284.364	5.35107
	711	Q9Y2I2	Netrin-G1 OS=Homo sapiens GN=NTNG1 PE=1 SV=3 - [NTNG1_HUMAN]	53.06	6	1	19	31	539	60.5006	6.26514
	712	O43747	AP-1 complex subunit gamma-1 OS=Homo sapiens GN=AP1G1 PE=1 SV=5 - [AP1G1_HUMAN]	53.04	2	1	30	77	822	91.2931	6.80029
	713	Q3SXY8	ADP-ribosylation factor-like protein 13B OS=Homo sapiens GN=ARL13B PE=1 SV=1 - [AR13B_HUMAN]	53.04	1	1	16	39	428	48.6128	6.62451
	714	P05187	Alkaline phosphatase, placental type OS=Homo sapiens GN=ALPP PE=1 SV=2 - [PPB1_HUMAN]	52.9	1	1	18	49	535	57.9173	6.29053
	715	O00232	26S proteasome non-ATPase regulatory subunit 12 OS=Homo sapiens GN=PSMD12 PE=1 SV=3 - [PSD12_HUMAN]	52.85	1	1	18	69	456	52.8706	7.6499
	716	Q9Y265	RuvB-like 1 OS=Homo sapiens GN=RUVBL1 PE=1 SV=1 - [RUVB1_HUMAN]	52.85	2	5	18	47	456	50.1963	6.41748
	717	O76003	Glutaredoxin-3 OS=Homo sapiens GN=GLRX3 PE=1 SV=2 - [GLRX3_HUMAN]	52.84	1	3	14	31	335	37.4082	5.38916
	718	P35754	Glutaredoxin-1 OS=Homo sapiens GN=GLRX PE=1 SV=2 - [GLRX1_HUMAN]	52.83	1	1	4	8	106	11.7682	8.08936
	719	Q9Y3M8	StAR-related lipid transfer protein 13 OS=Homo sapiens GN=STARD13 PE=1 SV=2 - [STA13_HUMAN]	52.83	4	1	35	65	1113	124.889	7.02002
	720	Q96K12	Fatty acyl-CoA reductase 2 OS=Homo sapiens GN=FAR2 PE=2 SV=1 - [FACR2_HUMAN]	52.82	1	1	20	61	515	59.4001	9.37842
	721	P60866-2	Isoform 2 of 40S ribosomal protein S20 OS=Homo sapiens GN=RPS20 - [RS20_HUMAN]	52.82	2	4	6	53	142	15.9954	9.31982
	722	P15172	Myoblast determination protein 1 OS=Homo sapiens GN=MYOD1 PE=1 SV=3 - [MYOD1_HUMAN]	52.81	1	1	10	21	320	34.4797	5.85889
	723	Q9Y483	Metal-response element-binding transcription factor 2 OS=Homo sapiens GN=MTF2 PE=1 SV=2 - [MTF2_HUMAN]	52.78	2	1	21	56	593	67.0627	8.71924
	724	P62826	GTP-binding nuclear protein Ran OS=Homo sapiens GN=RAN PE=1 SV=3 - [RAN_HUMAN]	52.78	1	4	12	62	216	24.4076	7.48877
	725	P35367	Histamine H1 receptor OS=Homo sapiens GN=HRH1 PE=1 SV=1 - [HRH1_HUMAN]	52.77	1	1	12	30	487	55.7476	9.21729
	726	Q8N4S7	Progestin and adipoQ receptor family member 4 OS=Homo sapiens GN=PAQR4 PE=2 SV=3 - [PAQR4_HUMAN]	52.75	3	1	7	25	273	29.107	8.93896
	727	P06241	Tyrosine-protein kinase Fyn OS=Homo sapiens GN=FYN PE=1 SV=3 - [FYN_HUMAN]	52.7	92	1	23	69	537	60.7234	6.66846
	728	Q9NV70	Exocyst complex component 1 OS=Homo sapiens GN=EXOC1 PE=1 SV=4 - [EXOC1_HUMAN]	52.68	2	1	36	67	894	101.917	6.60986
	729	Q8TF66-2	Isoform 2 of Leucine-rich repeat-containing protein 15 OS=Homo sapiens GN=LRRC15 - [LRC15_HUMAN]	52.64	2	9	19	82	587	64.9805	6.7124
	730	Q9H252-2	Isoform 2 of Potassium voltage-gated channel subfamily H member 6 OS=Homo sapiens GN=KCNH6 - [KCNH6_HUMAN]	52.6	3	1	24	44	905	100.386	6.96143
	731	O75665	Oral-facial-digital syndrome 1 protein OS=Homo sapiens GN=OFD1 PE=1 SV=1 - [OFD1_HUMAN]	52.57	3	2	46	117	1012	116.599	6.1001
	732	P31943	Heterogeneous nuclear ribonucleoprotein H OS=Homo sapiens GN=HNRNPH1 PE=1 SV=4 - [HNRH1_HUMAN]	52.56	3	2	18	52	449	49.1984	6.30322
	733	Q96HJ3	Coiled-coil domain-containing protein 34 OS=Homo sapiens GN=CCDC34 PE=2 SV=2 - [CCD34_HUMAN]	52.55	1	1	13	22	373	43.1987	7.40088
	734	Q8IXJ9	Putative Polycomb group protein ASXL1 OS=Homo sapiens GN=ASXL1 PE=1 SV=3 - [ASXL1_HUMAN]	52.5	1	1	57	129	1541	165.345	6.21436
	735	Q01081	Splicing factor U2AF 35 kDa subunit OS=Homo sapiens GN=U2AF1 PE=1 SV=3 - [U2AF1_HUMAN]	52.5	3	2	12	29	240	27.8545	8.80713
	736	Q8ND30-2	Isoform 2 of Liprin-beta-2 OS=Homo sapiens GN=PPFIBP2 - [LIPB2_HUMAN]	52.49	3	1	31	82	764	86.4574	7.10791
	737	Q92736-2	Isoform 2 of Ryanodine receptor 2 OS=Homo sapiens GN=RYR2 - [RYR2_HUMAN]	52.46	2	1	190	445	4975	565.05	6.1001
	738	P40926	Malate dehydrogenase, mitochondrial OS=Homo sapiens GN=MDH2 PE=1 SV=3 - [MDHM_HUMAN]	52.37	1	6	14	53	338	35.4807	8.67529
	739	Q15404	Ras suppressor protein 1 OS=Homo sapiens GN=RSU1 PE=1 SV=3 - [RSU1_HUMAN]	52.35	2	1	14	22	277	31.5207	8.646
	740	P13693	Translationally-controlled tumor protein OS=Homo sapiens GN=TPT1 PE=1 SV=1 - [TCTP_HUMAN]	52.33	2	4	12	53	172	19.5826	4.93213
	741	Q7Z624	Calmodulin-lysine N-methyltransferase OS=Homo sapiens GN=CAMKMT PE=1 SV=2 - [CMKMT_HUMAN]	52.32	1	1	16	57	323	36.1052	6.82959
	742	Q9Y3F4	Serine-threonine kinase receptor-associated protein OS=Homo sapiens GN=STRAP PE=1 SV=1 - [STRAP_HUMAN]	52.29	1	1	12	20	350	38.414	5.12256
	743	Q9UQ80	Proliferation-associated protein 2G4 OS=Homo sapiens GN=PA2G4 PE=1 SV=3 - [PA2G4_HUMAN]	52.28	1	4	18	55	394	43.7592	6.55127
	744	Q9Y4F4	Protein FAM179B OS=Homo sapiens GN=FAM179B PE=1 SV=4 - [F179B_HUMAN]	52.21	3	1	61	121	1720	189.242	8.49951
	745	Q9Y2B0	Protein canopy homolog 2 OS=Homo sapiens GN=CNPY2 PE=1 SV=1 - [CNPY2_HUMAN]	52.2	2	2	8	13	182	20.6392	4.91943
	746	Q96C12	Armadillo repeat-containing protein 5 OS=Homo sapiens GN=ARMC5 PE=1 SV=2 - [ARMC5_HUMAN]	52.19	4	1	23	44	935	97.6202	7.10791
	747	Q15008	26S proteasome non-ATPase regulatory subunit 6 OS=Homo sapiens GN=PSMD6 PE=1 SV=1 - [PSMD6_HUMAN]	52.19	2	3	21	55	389	45.5023	5.61768
	748	P62857	40S ribosomal protein S28 OS=Homo sapiens GN=RPS28 PE=1 SV=1 - [RS28_HUMAN]	52.17	1	2	4	19	69	7.8362	10.6968
	749	Q7L2H7	Eukaryotic translation initiation factor 3 subunit M OS=Homo sapiens GN=EIF3M PE=1 SV=1 - [EIF3M_HUMAN]	52.14	1	1	14	27	374	42.4758	5.63037
	750	Q9NPQ8-3	Isoform 3 of Synembryn-A OS=Homo sapiens GN=RIC8A - [RIC8A_HUMAN]	52.14	4	2	21	57	537	60.3338	5.32568
	751	Q9BPU6	Dihydropyrimidinase-related protein 5 OS=Homo sapiens GN=DPYSL5 PE=1 SV=1 - [DPYL5_HUMAN]	52.13	1	1	18	64	564	61.3822	7.1958
	752	Q07092-2	Isoform 2 of Collagen alpha-1(XVI) chain OS=Homo sapiens GN=COL16A1 - [COGA1_HUMAN]	52.12	1	1	53	141	1602	157.458	7.84033
	753	Q9HCR9-2	Isoform 2 of Dual 3',5'-cyclic-AMP and -GMP phosphodiesterase 11A OS=Homo sapiens GN=PDE11A - [PDE11_HUMAN]	52.12	3	1	22	56	683	77.9967	6.58057
	754	Q13907-2	Isoform 2 of Isopentenyl-diphosphate Delta-isomerase 1 OS=Homo sapiens GN=IDI1 - [IDI1_HUMAN]	52.11	1	1	15	49	284	32.4647	7.88428
	755	Q7Z2W4	Zinc finger CCCH-type antiviral protein 1 OS=Homo sapiens GN=ZC3HAV1 PE=1 SV=3 - [ZCCHV_HUMAN]	52.11	3	1	35	60	902	101.367	8.39697
	756	P10276-2	Isoform Alpha-2 of Retinoic acid receptor alpha OS=Homo sapiens GN=RARA - [RARA_HUMAN]	52.08	3	1	12	23	457	50.7094	7.76709
	757	Q96MT8	Centrosomal protein of 63 kDa OS=Homo sapiens GN=CEP63 PE=1 SV=1 - [CEP63_HUMAN]	52.06	3	1	26	65	703	81.2932	6.12549
	758	P28222	5-hydroxytryptamine receptor 1B OS=Homo sapiens GN=HTR1B PE=1 SV=1 - [5HT1B_HUMAN]	52.05	1	1	8	11	390	43.5398	8.68994
	759	A6NJT0	Homeobox protein unc-4 homolog OS=Homo sapiens GN=UNCX PE=2 SV=1 - [UNC4_HUMAN]	51.98	1	1	14	23	531	53.6568	7.1958
	760	Q8IWE4	DCN1-like protein 3 OS=Homo sapiens GN=DCUN1D3 PE=1 SV=1 - [DCNL3_HUMAN]	51.97	1	1	13	43	304	34.2696	5.12256
	761	P35573	Glycogen debranching enzyme OS=Homo sapiens GN=AGL PE=1 SV=3 - [GDE_HUMAN]	51.96	3	2	53	108	1532	174.652	6.75635
	762	Q495B1-1	Isoform 1 of Ankyrin repeat and death domain-containing protein 1A OS=Homo sapiens GN=ANKDD1A - [AKD1A_HUMAN]	51.95	3	1	19	32	514	56.657	6.88818
	763	P62495	Eukaryotic peptide chain release factor subunit 1 OS=Homo sapiens GN=ETF1 PE=1 SV=3 - [ERF1_HUMAN]	51.95	1	2	18	34	437	49.0002	5.70654
	764	Q9NZL4	Hsp70-binding protein 1 OS=Homo sapiens GN=HSPBP1 PE=1 SV=1 - [HPBP1_HUMAN]	51.93	1	1	12	25	362	39.4485	5.21143
	765	Q8NEV1	Casein kinase II subunit alpha 3 OS=Homo sapiens GN=CSNK2A3 PE=1 SV=2 - [CSK23_HUMAN]	51.92	3	1	19	83	391	45.1909	8.49951
	766	Q9P273	Teneurin-3 OS=Homo sapiens GN=TENM3 PE=2 SV=3 - [TEN3_HUMAN]	51.91	1	1	83	153	2699	300.76	6.41748
	767	A6NNM8	Tubulin polyglutamylase TTLL13 OS=Homo sapiens GN=TTLL13 PE=2 SV=2 - [TTL13_HUMAN]	51.9	1	1	33	97	815	93.5855	8.90967
	768	Q5H9R7	Serine/threonine-protein phosphatase 6 regulatory subunit 3 OS=Homo sapiens GN=PPP6R3 PE=1 SV=2 - [PP6R3_HUMAN]	51.89	6	1	22	75	873	97.6076	4.60205
	769	Q14204	Cytoplasmic dynein 1 heavy chain 1 OS=Homo sapiens GN=DYNC1H1 PE=1 SV=5 - [DYHC1_HUMAN]	51.87	1	45	187	533	4646	532.072	6.40479
	770	Q07954	Prolow-density lipoprotein receptor-related protein 1 OS=Homo sapiens GN=LRP1 PE=1 SV=2 - [LRP1_HUMAN]	51.83	1	6	138	363	4544	504.276	5.38916
	771	P84095	Rho-related GTP-binding protein RhoG OS=Homo sapiens GN=RHOG PE=1 SV=1 - [RHOG_HUMAN]	51.83	4	6	9	48	191	21.2949	8.11865
	772	Q12979	Active breakpoint cluster region-related protein OS=Homo sapiens GN=ABR PE=2 SV=2 - [ABR_HUMAN]	51.8	3	1	33	70	859	97.5362	6.55127
	773	Q96EN8	Molybdenum cofactor sulfurase OS=Homo sapiens GN=MOCOS PE=1 SV=2 - [MOCOS_HUMAN]	51.8	1	1	27	74	888	98.0579	6.69775
	774	Q99653	Calcineurin B homologous protein 1 OS=Homo sapiens GN=CHP1 PE=1 SV=3 - [CHP1_HUMAN]	51.79	1	4	10	23	195	22.4423	5.09717
	775	P13798	Acylamino-acid-releasing enzyme OS=Homo sapiens GN=APEH PE=1 SV=4 - [ACPH_HUMAN]	51.78	1	1	24	42	732	81.1726	5.47803
	776	O43869	Olfactory receptor 2T1 OS=Homo sapiens GN=OR2T1 PE=2 SV=3 - [OR2T1_HUMAN]	51.76	1	1	7	13	369	41.9674	8.38232
	777	P05386	60S acidic ribosomal protein P1 OS=Homo sapiens GN=RPLP1 PE=1 SV=1 - [RLA1_HUMAN]	51.75	1	2	2	29	114	11.5067	4.32275
	778	O75477	Erlin-1 OS=Homo sapiens GN=ERLIN1 PE=1 SV=1 - [ERLN1_HUMAN]	51.73	2	1	14	22	346	38.9014	7.86963
	779	O75335-2	Isoform 2 of Liprin-alpha-4 OS=Homo sapiens GN=PPFIA4 - [LIPA4_HUMAN]	51.73	2	1	29	103	692	77.0402	7.76709
	780	O60242	Brain-specific angiogenesis inhibitor 3 OS=Homo sapiens GN=BAI3 PE=1 SV=2 - [BAI3_HUMAN]	51.71	1	1	48	104	1522	171.406	7.06396
	781	Q04828	Aldo-keto reductase family 1 member C1 OS=Homo sapiens GN=AKR1C1 PE=1 SV=1 - [AK1C1_HUMAN]	51.7	4	2	15	47	323	36.765	7.88428
	782	Q8IUG5	Unconventional myosin-XVIIIb OS=Homo sapiens GN=MYO18B PE=1 SV=1 - [MY18B_HUMAN]	51.69	2	1	109	269	2567	285.008	6.90283
	783	O94832	Unconventional myosin-Id OS=Homo sapiens GN=MYO1D PE=1 SV=2 - [MYO1D_HUMAN]	51.69	1	4	47	96	1006	116.129	9.39307
	784	O00151	PDZ and LIM domain protein 1 OS=Homo sapiens GN=PDLIM1 PE=1 SV=4 - [PDLI1_HUMAN]	51.67	1	1	10	15	329	36.049	7.02002
	785	Q9P1Z2	Calcium-binding and coiled-coil domain-containing protein 1 OS=Homo sapiens GN=CALCOCO1 PE=1 SV=2 - [CACO1_HUMAN]	51.66	4	1	25	96	691	77.2888	4.81787
	786	Q13162	Peroxiredoxin-4 OS=Homo sapiens GN=PRDX4 PE=1 SV=1 - [PRDX4_HUMAN]	51.66	1	2	12	48	271	30.5208	6.29053
	787	Q9BQB4-2	Isoform 2 of Sclerostin OS=Homo sapiens GN=SOST - [SOST_HUMAN]	51.61	1	1	13	31	217	24.2483	9.39307
	788	Q08378	Golgin subfamily A member 3 OS=Homo sapiens GN=GOLGA3 PE=1 SV=2 - [GOGA3_HUMAN]	51.6	3	1	63	154	1498	167.252	5.43994
	789	Q96PU5	E3 ubiquitin-protein ligase NEDD4-like OS=Homo sapiens GN=NEDD4L PE=1 SV=2 - [NED4L_HUMAN]	51.59	12	2	34	72	975	111.862	5.8208
	790	Q86V48	Leucine zipper protein 1 OS=Homo sapiens GN=LUZP1 PE=1 SV=2 - [LUZP1_HUMAN]	51.58	3	2	46	113	1076	120.202	8.49951
	791	Q9P2K8-2	Isoform 2 of Eukaryotic translation initiation factor 2-alpha kinase 4 OS=Homo sapiens GN=EIF2AK4 - [E2AK4_HUMAN]	51.57	3	1	49	124	1621	183.602	6.41748
	792	O95522	PRAME family member 12 OS=Homo sapiens GN=PRAMEF12 PE=2 SV=1 - [PRA12_HUMAN]	51.55	1	1	16	38	483	54.6272	6.52197
	793	P30085	UMP-CMP kinase OS=Homo sapiens GN=CMPK1 PE=1 SV=3 - [KCY_HUMAN]	51.53	2	1	11	34	196	22.2083	5.56689
	794	O60784-4	Isoform 4 of Target of Myb protein 1 OS=Homo sapiens GN=TOM1 - [TOM1_HUMAN]	51.52	4	2	15	41	460	50.2372	4.77979
	795	Q13283	Ras GTPase-activating protein-binding protein 1 OS=Homo sapiens GN=G3BP1 PE=1 SV=1 - [G3BP1_HUMAN]	51.5	1	2	13	33	466	52.1321	5.51611
	796	Q96N16-2	Isoform 2 of Janus kinase and microtubule-interacting protein 1 OS=Homo sapiens GN=JAKMIP1 - [JKIP1_HUMAN]	51.5	4	1	38	100	831	97.3759	5.79541
	797	A6NNP5-4	Isoform 4 of Coiled-coil domain-containing protein 169 OS=Homo sapiens GN=CCDC169 - [CC169_HUMAN]	51.45	4	1	8	38	241	27.8234	7.41553
	798	O00469-2	Isoform 2 of Procollagen-lysine,2-oxoglutarate 5-dioxygenase 2 OS=Homo sapiens GN=PLOD2 - [PLOD2_HUMAN]	51.45	2	1	28	70	758	87.0428	6.7124
	799	Q9NRC6	Spectrin beta chain, non-erythrocytic 5 OS=Homo sapiens GN=SPTBN5 PE=1 SV=1 - [SPTN5_HUMAN]	51.42	1	3	137	261	3674	416.579	6.66846
	800	Q8TD57	Dynein heavy chain 3, axonemal OS=Homo sapiens GN=DNAH3 PE=2 SV=1 - [DYH3_HUMAN]	51.38	1	1	160	394	4116	470.468	6.43018
	801	P32004-3	Isoform 3 of Neural cell adhesion molecule L1 OS=Homo sapiens GN=L1CAM - [L1CAM_HUMAN]	51.36	3	1	41	94	1248	138.821	6.21436
	802	Q96PD2	Discoidin, CUB and LCCL domain-containing protein 2 OS=Homo sapiens GN=DCBLD2 PE=1 SV=1 - [DCBD2_HUMAN]	51.35	2	6	25	68	775	84.9808	7.1665
	803	Q68BL8	Olfactomedin-like protein 2B OS=Homo sapiens GN=OLFML2B PE=2 SV=2 - [OLM2B_HUMAN]	51.33	1	1	24	59	750	83.9466	5.19873
	804	P11279	Lysosome-associated membrane glycoprotein 1 OS=Homo sapiens GN=LAMP1 PE=1 SV=3 - [LAMP1_HUMAN]	51.32	1	4	13	67	417	44.8538	8.74854
	805	Q04941	Proteolipid protein 2 OS=Homo sapiens GN=PLP2 PE=1 SV=1 - [PLP2_HUMAN]	51.32	1	1	5	29	152	16.6797	7.23975
	806	P38405-2	Isoform 2 of Guanine nucleotide-binding protein G(olf) subunit alpha OS=Homo sapiens GN=GNAL - [GNAL_HUMAN]	51.31	2	1	19	77	458	52.4217	7.09326
	807	Q96Q42	Alsin OS=Homo sapiens GN=ALS2 PE=1 SV=2 - [ALS2_HUMAN]	51.3	1	1	51	108	1657	183.518	6.26514
	808	P08134	Rho-related GTP-binding protein RhoC OS=Homo sapiens GN=RHOC PE=1 SV=1 - [RHOC_HUMAN]	51.3	1	2	10	119	193	21.9923	6.58057
	809	Q4ADV7	Protein RIC1 homolog OS=Homo sapiens GN=KIAA1432 PE=1 SV=2 - [RIC1_HUMAN]	51.3	3	1	46	115	1423	159.199	6.37939
	810	Q9NYF3	Protein FAM53C OS=Homo sapiens GN=FAM53C PE=1 SV=1 - [FA53C_HUMAN]	51.28	1	1	13	23	392	43.0645	8.646
	811	P49448	Glutamate dehydrogenase 2, mitochondrial OS=Homo sapiens GN=GLUD2 PE=1 SV=2 - [DHE4_HUMAN]	51.25	2	2	18	46	558	61.3954	8.45557
	812	O15061	Synemin OS=Homo sapiens GN=SYNM PE=1 SV=2 - [SYNEM_HUMAN]	51.25	2	1	62	147	1565	172.663	5.16064
	813	P12694	2-oxoisovalerate dehydrogenase subunit alpha, mitochondrial OS=Homo sapiens GN=BCKDHA PE=1 SV=2 - [ODBA_HUMAN]	51.24	1	1	16	44	445	50.4392	8.26514
	814	O95747	Serine/threonine-protein kinase OSR1 OS=Homo sapiens GN=OXSR1 PE=1 SV=1 - [OXSR1_HUMAN]	51.23	1	3	19	47	527	57.9861	6.43018
	815	Q96D15	Reticulocalbin-3 OS=Homo sapiens GN=RCN3 PE=1 SV=1 - [RCN3_HUMAN]	51.22	1	1	11	17	328	37.47	4.89404
	816	P53618	Coatomer subunit beta OS=Homo sapiens GN=COPB1 PE=1 SV=3 - [COPB_HUMAN]	51.21	1	1	39	86	953	107.074	6.04932
	817	O14737	Programmed cell death protein 5 OS=Homo sapiens GN=PDCD5 PE=1 SV=3 - [PDCD5_HUMAN]	51.2	1	1	7	29	125	14.2763	6.03662
	818	Q5T9L3-2	Isoform 2 of Protein wntless homolog OS=Homo sapiens GN=WLS - [WLS_HUMAN]	51.2	3	1	20	64	543	62.5097	7.62061
	819	P07947	Tyrosine-protein kinase Yes OS=Homo sapiens GN=YES1 PE=1 SV=3 - [YES_HUMAN]	51.2	92	1	23	77	543	60.7625	6.7417
	820	Q9UKS6	Protein kinase C and casein kinase substrate in neurons protein 3 OS=Homo sapiens GN=PACSIN3 PE=1 SV=2 - [PACN3_HUMAN]	51.18	1	1	13	34	424	48.4568	6.17627
	821	Q9H3K6	BolA-like protein 2 OS=Homo sapiens GN=BOLA2 PE=1 SV=1 - [BOLA2_HUMAN]	51.16	2	1	3	8	86	10.1102	6.52197
	822	Q8NFY9	Kelch repeat and BTB domain-containing protein 8 OS=Homo sapiens GN=KBTBD8 PE=2 SV=2 - [KBTB8_HUMAN]	51.08	1	1	19	41	601	68.778	6.29053
	823	Q9NTK5	Obg-like ATPase 1 OS=Homo sapiens GN=OLA1 PE=1 SV=2 - [OLA1_HUMAN]	51.01	3	4	20	47	396	44.7153	7.81104
	824	P61313	60S ribosomal protein L15 OS=Homo sapiens GN=RPL15 PE=1 SV=2 - [RL15_HUMAN]	50.98	2	4	10	28	204	24.1311	11.6196
	825	P35240-2	Isoform 2 of Merlin OS=Homo sapiens GN=NF2 - [MERL_HUMAN]	50.97	8	1	28	72	620	72.4675	7.10791
	826	Q7L576	Cytoplasmic FMR1-interacting protein 1 OS=Homo sapiens GN=CYFIP1 PE=1 SV=1 - [CYFP1_HUMAN]	50.92	5	9	55	166	1253	145.089	6.90283
	827	P48739	Phosphatidylinositol transfer protein beta isoform OS=Homo sapiens GN=PITPNB PE=1 SV=2 - [PIPNB_HUMAN]	50.92	2	2	14	23	271	31.5199	6.87354
	828	O95782-2	Isoform B of AP-2 complex subunit alpha-1 OS=Homo sapiens GN=AP2A1 - [AP2A1_HUMAN]	50.89	5	10	36	90	955	105.295	7.66455
	829	Q99943	1-acyl-sn-glycerol-3-phosphate acyltransferase alpha OS=Homo sapiens GN=AGPAT1 PE=1 SV=2 - [PLCA_HUMAN]	50.88	1	1	10	46	283	31.6957	9.37842
	830	P51805	Plexin-A3 OS=Homo sapiens GN=PLXNA3 PE=1 SV=2 - [PLXA3_HUMAN]	50.88	1	1	61	105	1871	207.57	7.31299
	831	Q5JST6	EF-hand domain-containing family member C2 OS=Homo sapiens GN=EFHC2 PE=1 SV=2 - [EFHC2_HUMAN]	50.87	1	1	29	62	749	87.341	7.37158
	832	Q15181	Inorganic pyrophosphatase OS=Homo sapiens GN=PPA1 PE=1 SV=2 - [IPYR_HUMAN]	50.87	1	3	12	24	289	32.6392	5.85889
	833	Q96T51	RUN and FYVE domain-containing protein 1 OS=Homo sapiens GN=RUFY1 PE=1 SV=2 - [RUFY1_HUMAN]	50.85	2	1	31	96	708	79.7673	5.74463
	834	P07942	Laminin subunit beta-1 OS=Homo sapiens GN=LAMB1 PE=1 SV=2 - [LAMB1_HUMAN]	50.84	1	2	54	114	1786	197.909	4.94482
	835	P08243	Asparagine synthetase [glutamine-hydrolyzing] OS=Homo sapiens GN=ASNS PE=1 SV=4 - [ASNS_HUMAN]	50.8	3	1	24	60	561	64.3286	6.85889
	836	Q9H078-4	Isoform 4 of Caseinolytic peptidase B protein homolog OS=Homo sapiens GN=CLPB - [CLPB_HUMAN]	50.76	1	1	22	56	662	74.4964	8.73389
	837	Q9NRZ9	Lymphoid-specific helicase OS=Homo sapiens GN=HELLS PE=1 SV=1 - [HELLS_HUMAN]	50.72	6	1	34	85	838	97.0122	7.92822
	838	O75128-2	Isoform 2 of Protein cordon-bleu OS=Homo sapiens GN=COBL - [COBL_HUMAN]	50.71	5	1	46	80	1343	143.84	7.41553
	839	Q9NWQ8	Phosphoprotein associated with glycosphingolipid-enriched microdomains 1 OS=Homo sapiens GN=PAG1 PE=1 SV=2 - [PHAG1_HUMAN]	50.69	1	1	15	27	432	46.9515	4.65283
	840	P41226	Ubiquitin-like modifier-activating enzyme 7 OS=Homo sapiens GN=UBA7 PE=1 SV=2 - [UBA7_HUMAN]	50.69	1	1	30	68	1012	111.624	6.03662
	841	Q96L50-2	Isoform 2 of Leucine-rich repeat protein 1 OS=Homo sapiens GN=LRR1 - [LLR1_HUMAN]	50.68	1	1	5	20	146	16.9529	9.51025
	842	P16333	Cytoplasmic protein NCK1 OS=Homo sapiens GN=NCK1 PE=1 SV=1 - [NCK1_HUMAN]	50.66	2	1	12	33	377	42.8374	6.46826
	843	Q53EZ4	Centrosomal protein of 55 kDa OS=Homo sapiens GN=CEP55 PE=1 SV=3 - [CEP55_HUMAN]	50.65	2	2	19	38	464	54.1452	7.00537
	844	P27487	Dipeptidyl peptidase 4 OS=Homo sapiens GN=DPP4 PE=1 SV=2 - [DPP4_HUMAN]	50.65	1	7	28	80	766	88.2225	6.03662
	845	Q86VP6	Cullin-associated NEDD8-dissociated protein 1 OS=Homo sapiens GN=CAND1 PE=1 SV=2 - [CAND1_HUMAN]	50.57	3	7	45	110	1230	136.289	5.78271
	846	Q68DX3	FERM and PDZ domain-containing protein 2 OS=Homo sapiens GN=FRMPD2 PE=1 SV=3 - [FRPD2_HUMAN]	50.57	5	1	45	89	1309	144.191	6.7417
	847	Q86UU1-2	Isoform 2 of Pleckstrin homology-like domain family B member 1 OS=Homo sapiens GN=PHLDB1 - [PHLB1_HUMAN]	50.57	2	1	50	132	1319	144.65	8.5874
	848	Q8N9Y4	Protein FAM181A OS=Homo sapiens GN=FAM181A PE=2 SV=3 - [F181A_HUMAN]	50.56	2	1	10	18	354	38.6991	9.70068
	849	Q14573	Inositol 1,4,5-trisphosphate receptor type 3 OS=Homo sapiens GN=ITPR3 PE=1 SV=2 - [ITPR3_HUMAN]	50.54	1	1	103	247	2671	303.912	6.48096
	850	P46781	40S ribosomal protein S9 OS=Homo sapiens GN=RPS9 PE=1 SV=3 - [RS9_HUMAN]	50.52	1	7	13	79	194	22.5776	10.6528
	851	O15438-4	Isoform 4 of Canalicular multispecific organic anion transporter 2 OS=Homo sapiens GN=ABCC3 - [MRP3_HUMAN]	50.51	4	1	46	94	1578	174.795	7.63525
	852	Q6UX72	UDP-GlcNAc:betaGal beta-1,3-N-acetylglucosaminyltransferase 9 OS=Homo sapiens GN=B3GNT9 PE=2 SV=1 - [B3GN9_HUMAN]	50.5	1	1	14	31	402	43.7238	9.17334
	853	O60884	DnaJ homolog subfamily A member 2 OS=Homo sapiens GN=DNAJA2 PE=1 SV=1 - [DNJA2_HUMAN]	50.49	1	2	15	63	412	45.7166	6.48096
	854	Q9UHD2	Serine/threonine-protein kinase TBK1 OS=Homo sapiens GN=TBK1 PE=1 SV=1 - [TBK1_HUMAN]	50.48	1	1	27	58	729	83.5888	6.78564
	855	A6NKP2	Putative short-chain dehydrogenase/reductase family 42E member 2 OS=Homo sapiens GN=SDR42E2 PE=3 SV=3 - [D42E2_HUMAN]	50.47	1	1	13	43	422	46.8398	9.62744
	856	P33176	Kinesin-1 heavy chain OS=Homo sapiens GN=KIF5B PE=1 SV=1 - [KINH_HUMAN]	50.47	2	5	44	155	963	109.617	6.50732
	857	Q9Y242	Transcription factor 19 OS=Homo sapiens GN=TCF19 PE=1 SV=2 - [TCF19_HUMAN]	50.43	1	1	13	35	345	37.1597	8.32373
	858	P01023	Alpha-2-macroglobulin OS=Homo sapiens GN=A2M PE=1 SV=3 - [A2MG_HUMAN]	50.41	2	1	46	79	1474	163.188	6.45557
	859	P18124	60S ribosomal protein L7 OS=Homo sapiens GN=RPL7 PE=1 SV=1 - [RL7_HUMAN]	50.4	1	5	13	56	248	29.2072	10.6528
	860	O14617-5	Isoform 5 of AP-3 complex subunit delta-1 OS=Homo sapiens GN=AP3D1 - [AP3D1_HUMAN]	50.37	5	1	40	97	1215	136.565	7.63525
	861	P23468-2	Isoform 2 of Receptor-type tyrosine-protein phosphatase delta OS=Homo sapiens GN=PTPRD - [PTPRD_HUMAN]	50.37	6	2	67	167	1890	212	6.66846
	862	Q53SF7-2	Isoform 2 of Cordon-bleu protein-like 1 OS=Homo sapiens GN=COBLL1 - [COBL1_HUMAN]	50.34	2	1	32	69	1166	127.64	6.94678
	863	Q9Y5H6	Protocadherin alpha-8 OS=Homo sapiens GN=PCDHA8 PE=2 SV=1 - [PCDA8_HUMAN]	50.32	5	1	28	47	950	102.988	5.2876
	864	P55290-4	Isoform 4 of Cadherin-13 OS=Homo sapiens GN=CDH13 - [CAD13_HUMAN]	50.26	4	6	25	72	760	83.3451	5.12256
	865	P17302	Gap junction alpha-1 protein OS=Homo sapiens GN=GJA1 PE=1 SV=2 - [CXA1_HUMAN]	50.26	1	6	12	34	382	42.9809	8.76318
	866	Q9Y2H6	Fibronectin type-III domain-containing protein 3A OS=Homo sapiens GN=FNDC3A PE=1 SV=4 - [FND3A_HUMAN]	50.25	2	1	41	107	1198	131.767	6.7124
	867	O60890	Oligophrenin-1 OS=Homo sapiens GN=OPHN1 PE=1 SV=1 - [OPHN1_HUMAN]	50.25	1	1	34	85	802	91.5829	7.95752
	868	O60506	Heterogeneous nuclear ribonucleoprotein Q OS=Homo sapiens GN=SYNCRIP PE=1 SV=2 - [HNRPQ_HUMAN]	50.24	8	3	26	114	623	69.5596	8.5874
	869	P61006	Ras-related protein Rab-8A OS=Homo sapiens GN=RAB8A PE=1 SV=1 - [RAB8A_HUMAN]	50.24	18	3	11	109	207	23.6532	9.0708
	870	Q9BSK1-2	Isoform 2 of Zinc finger protein 577 OS=Homo sapiens GN=ZNF577 - [ZN577_HUMAN]	50.23	2	1	15	41	426	48.3391	9.01221
	871	Q8N371-3	Isoform 3 of Lysine-specific demethylase 8 OS=Homo sapiens GN=KDM8 - [KDM8_HUMAN]	50.22	2	1	15	66	454	50.8197	5.70654
	872	P31749	RAC-alpha serine/threonine-protein kinase OS=Homo sapiens GN=AKT1 PE=1 SV=2 - [AKT1_HUMAN]	50.21	7	1	16	61	480	55.6508	6.07471
	873	P17301	Integrin alpha-2 OS=Homo sapiens GN=ITGA2 PE=1 SV=1 - [ITA2_HUMAN]	50.21	1	18	41	182	1181	129.214	5.31299
	874	P29474	Nitric oxide synthase, endothelial OS=Homo sapiens GN=NOS3 PE=1 SV=3 - [NOS3_HUMAN]	50.21	3	2	38	112	1203	133.205	7.26904
	875	P36871-2	Isoform 2 of Phosphoglucomutase-1 OS=Homo sapiens GN=PGM1 - [PGM1_HUMAN]	50.17	3	3	21	34	580	63.7503	5.8335
	876	P59543	Taste receptor type 2 member 20 OS=Homo sapiens GN=TAS2R20 PE=2 SV=2 - [T2R20_HUMAN]	50.16	1	1	7	10	309	35.3344	10.0376
	877	Q96RT1-8	Isoform 8 of Protein LAP2 OS=Homo sapiens GN=ERBB2IP - [LAP2_HUMAN]	50.11	9	1	51	137	1419	158.926	5.63037
	878	H7BZ55	Putative ciliary rootlet coiled-coil protein-like 3 protein OS=Homo sapiens PE=5 SV=2 - [CROL3_HUMAN]	50.09	1	1	85	183	2252	248.242	5.8335
	879	O43175	D-3-phosphoglycerate dehydrogenase OS=Homo sapiens GN=PHGDH PE=1 SV=4 - [SERA_HUMAN]	50.09	1	6	24	93	533	56.6144	6.7124
	880	P53355	Death-associated protein kinase 1 OS=Homo sapiens GN=DAPK1 PE=1 SV=6 - [DAPK1_HUMAN]	50.07	2	1	43	91	1430	159.945	6.82959
	881	O75643	U5 small nuclear ribonucleoprotein 200 kDa helicase OS=Homo sapiens GN=SNRNP200 PE=1 SV=2 - [U520_HUMAN]	50.05	1	1	74	156	2136	244.353	6.06201
	882	P56134-2	Isoform 2 of ATP synthase subunit f, mitochondrial OS=Homo sapiens GN=ATP5J2 - [ATPK_HUMAN]	50	4	1	3	9	88	10.3565	9.86182
	883	Q5TA50	Ceramide-1-phosphate transfer protein OS=Homo sapiens GN=GLTPD1 PE=1 SV=1 - [CPTP_HUMAN]	50	1	1	8	11	214	24.3496	7.21045
	884	P23919	Thymidylate kinase OS=Homo sapiens GN=DTYMK PE=1 SV=4 - [KTHY_HUMAN]	50	1	2	10	20	212	23.8045	8.26514
	885	P60900	Proteasome subunit alpha type-6 OS=Homo sapiens GN=PSMA6 PE=1 SV=1 - [PSA6_HUMAN]	50	1	3	10	31	246	27.3818	6.75635
	886	O00487	26S proteasome non-ATPase regulatory subunit 14 OS=Homo sapiens GN=PSMD14 PE=1 SV=1 - [PSDE_HUMAN]	50	1	1	13	53	310	34.5546	6.52197
	887	P62249	40S ribosomal protein S16 OS=Homo sapiens GN=RPS16 PE=1 SV=2 - [RS16_HUMAN]	50	1	4	10	56	146	16.435	10.2134
	888	P62269	40S ribosomal protein S18 OS=Homo sapiens GN=RPS18 PE=1 SV=3 - [RS18_HUMAN]	50	1	4	11	65	152	17.7079	10.9897
	889	Q9Y6M7-13	Isoform 13 of Sodium bicarbonate cotransporter 3 OS=Homo sapiens GN=SLC4A7 - [S4A7_HUMAN]	49.96	14	5	39	102	1135	127.721	6.80029
	890	Q9H5I5-2	Isoform 2 of Piezo-type mechanosensitive ion channel component 2 OS=Homo sapiens GN=PIEZO2 - [PIEZ2_HUMAN]	49.94	4	1	95	222	2689	310.873	5.98584
	891	Q9P2D7	Dynein heavy chain 1, axonemal OS=Homo sapiens GN=DNAH1 PE=2 SV=4 - [DYH1_HUMAN]	49.91	4	2	146	311	4330	493.637	5.93506
	892	O15244	Solute carrier family 22 member 2 OS=Homo sapiens GN=SLC22A2 PE=1 SV=2 - [S22A2_HUMAN]	49.91	1	1	14	29	555	62.5395	8.36768
	893	P50993	Sodium/potassium-transporting ATPase subunit alpha-2 OS=Homo sapiens GN=ATP1A2 PE=1 SV=1 - [AT1A2_HUMAN]	49.9	3	1	41	195	1020	112.193	5.65576
	894	P25445	Tumor necrosis factor receptor superfamily member 6 OS=Homo sapiens GN=FAS PE=1 SV=1 - [TNR6_HUMAN]	49.85	3	2	12	26	335	37.708	7.94287
	895	O75334-6	Isoform 6 of Liprin-alpha-2 OS=Homo sapiens GN=PPFIA2 - [LIPA2_HUMAN]	49.83	8	1	37	93	1152	131.502	6.65381
	896	Q9H0X9	Oxysterol-binding protein-related protein 5 OS=Homo sapiens GN=OSBPL5 PE=1 SV=1 - [OSBL5_HUMAN]	49.72	2	1	29	47	879	98.5547	7.47412
	897	Q9NZ20	Group 3 secretory phospholipase A2 OS=Homo sapiens GN=PLA2G3 PE=1 SV=2 - [PA2G3_HUMAN]	49.71	1	1	19	54	509	57.1304	9.0708
	898	P57679	Ellis-van Creveld syndrome protein OS=Homo sapiens GN=EVC PE=1 SV=1 - [EVC_HUMAN]	49.7	1	1	32	88	992	111.92	6.72705
	899	P43121	Cell surface glycoprotein MUC18 OS=Homo sapiens GN=MCAM PE=1 SV=2 - [MUC18_HUMAN]	49.69	1	1	21	26	646	71.5626	5.75732
	900	Q9Y570-3	Isoform 3 of Protein phosphatase methylesterase 1 OS=Homo sapiens GN=PPME1 - [PPME1_HUMAN]	49.69	1	1	4	12	161	18.2022	6.84424
	901	Q9H1X3-3	Isoform 3 of DnaJ homolog subfamily C member 25 OS=Homo sapiens GN=DNAJC25 - [DJC25_HUMAN]	49.67	2	1	3	6	153	16.4885	8.60205
	902	Q8TBF5-2	Isoform 2 of Phosphatidylinositol-glycan biosynthesis class X protein OS=Homo sapiens GN=PIGX - [PIGX_HUMAN]	49.64	2	1	9	15	276	30.9539	6.90283
	903	Q96LJ8	UBX domain-containing protein 10 OS=Homo sapiens GN=UBXN10 PE=2 SV=1 - [UBX10_HUMAN]	49.64	1	1	11	21	280	30.7917	8.6167
	904	Q9Y5J5	Pleckstrin homology-like domain family A member 3 OS=Homo sapiens GN=PHLDA3 PE=1 SV=1 - [PHLA3_HUMAN]	49.61	1	2	5	10	127	13.8824	9.67139
	905	Q07955	Serine/arginine-rich splicing factor 1 OS=Homo sapiens GN=SRSF1 PE=1 SV=2 - [SRSF1_HUMAN]	49.6	3	6	12	40	248	27.7278	10.3599
	906	P15559-2	Isoform 2 of NAD(P)H dehydrogenase [quinone] 1 OS=Homo sapiens GN=NQO1 - [NQO1_HUMAN]	49.58	3	1	7	21	240	27.2782	8.71924
	907	Q9Y233-2	Isoform PDE10A2 of cAMP and cAMP-inhibited cGMP 3',5'-cyclic phosphodiesterase 10A OS=Homo sapiens GN=PDE10A - [PDE10_HUMAN]	49.56	2	2	25	46	789	89.3319	6.43018
	908	P49454	Centromere protein F OS=Homo sapiens GN=CENPF PE=1 SV=2 - [CENPF_HUMAN]	49.53	1	1	136	282	3210	367.537	5.07178
	909	Q9UK61-4	Isoform 4 of Protein FAM208A OS=Homo sapiens GN=FAM208A - [F208A_HUMAN]	49.53	4	1	56	117	1609	182.167	5.79541
	910	P0C7U0	Protein ELFN1 OS=Homo sapiens GN=ELFN1 PE=1 SV=2 - [ELFN1_HUMAN]	49.52	1	1	24	49	828	90.42	8.36768
	911	Q8IVF7	Formin-like protein 3 OS=Homo sapiens GN=FMNL3 PE=1 SV=3 - [FMNL3_HUMAN]	49.51	5	1	35	79	1028	117.139	6.65381
	912	Q9Y618	Nuclear receptor corepressor 2 OS=Homo sapiens GN=NCOR2 PE=1 SV=2 - [NCOR2_HUMAN]	49.5	4	1	82	171	2525	274.635	7.59131
	913	Q8NEN0	Armadillo repeat-containing protein 2 OS=Homo sapiens GN=ARMC2 PE=2 SV=4 - [ARMC2_HUMAN]	49.48	1	1	32	54	867	96.8054	8.22119
	914	Q96QB1	Rho GTPase-activating protein 7 OS=Homo sapiens GN=DLC1 PE=1 SV=4 - [RHG07_HUMAN]	49.48	3	1	50	118	1528	170.485	6.40479
	915	Q6P9A2-2	Isoform 2 of Polypeptide N-acetylgalactosaminyltransferase 18 OS=Homo sapiens GN=GALNT18 - [GLT18_HUMAN]	49.45	1	1	2	4	91	10.3905	8.646
	916	Q7Z304	MAM domain-containing protein 2 OS=Homo sapiens GN=MAMDC2 PE=2 SV=3 - [MAMC2_HUMAN]	49.42	2	5	24	59	686	77.5058	5.16064
	917	Q15173-2	Isoform Beta-2 of Serine/threonine-protein phosphatase 2A 56 kDa regulatory subunit beta isoform OS=Homo sapiens GN=PPP2R5B - [2A5B_HUMAN]	49.39	2	1	17	41	494	57.2578	6.59521
	918	Q53GL0	Pleckstrin homology domain-containing family O member 1 OS=Homo sapiens GN=PLEKHO1 PE=1 SV=2 - [PKHO1_HUMAN]	49.39	2	1	17	54	409	46.2087	8.82178
	919	Q969V3	Nicalin OS=Homo sapiens GN=NCLN PE=1 SV=2 - [NCLN_HUMAN]	49.38	1	1	16	32	563	62.9346	6.88818
	920	P51665	26S proteasome non-ATPase regulatory subunit 7 OS=Homo sapiens GN=PSMD7 PE=1 SV=2 - [PSMD7_HUMAN]	49.38	1	4	12	49	324	37.0025	6.771
	921	P62280	40S ribosomal protein S11 OS=Homo sapiens GN=RPS11 PE=1 SV=3 - [RS11_HUMAN]	49.37	1	4	8	21	158	18.419	10.3013
	922	P58557-4	Isoform D of Putative ribonuclease OS=Homo sapiens GN=YBEY - [YBEY_HUMAN]	49.37	1	1	3	21	79	8.93086	11.1802
	923	Q6ZRS4-4	Isoform 4 of Coiled-coil domain-containing protein 129 OS=Homo sapiens GN=CCDC129 - [CC129_HUMAN]	49.34	3	1	31	117	1062	117.641	5.38916
	924	P35241-5	Isoform 5 of Radixin OS=Homo sapiens GN=RDX - [RADI_HUMAN]	49.34	4	2	27	131	604	71.0046	6.7124
	925	Q9HD67	Unconventional myosin-X OS=Homo sapiens GN=MYO10 PE=1 SV=3 - [MYO10_HUMAN]	49.32	1	1	72	179	2058	237.198	6.21436
	926	O95816	BAG family molecular chaperone regulator 2 OS=Homo sapiens GN=BAG2 PE=1 SV=1 - [BAG2_HUMAN]	49.29	1	1	7	28	211	23.7572	6.69775
	927	Q6ZNJ1-3	Isoform 3 of Neurobeachin-like protein 2 OS=Homo sapiens GN=NBEAL2 - [NBEL2_HUMAN]	49.27	3	1	81	218	2724	299.153	6.37939
	928	Q562F6-2	Isoform 2 of Shugoshin-like 2 OS=Homo sapiens GN=SGOL2 - [SGOL2_HUMAN]	49.25	2	1	46	130	1261	144.092	7.6792
	929	P05106	Integrin beta-3 OS=Homo sapiens GN=ITGB3 PE=1 SV=2 - [ITB3_HUMAN]	49.24	3	11	31	122	788	87.0004	5.23682
	930	Q15111	Inactive phospholipase C-like protein 1 OS=Homo sapiens GN=PLCL1 PE=1 SV=3 - [PLCL1_HUMAN]	49.22	2	1	37	117	1095	122.649	5.61768
	931	P29374-2	Isoform II of AT-rich interactive domain-containing protein 4A OS=Homo sapiens GN=ARID4A - [ARI4A_HUMAN]	49.21	3	1	39	75	1203	136.411	4.95752
	932	P61081	NEDD8-conjugating enzyme Ubc12 OS=Homo sapiens GN=UBE2M PE=1 SV=1 - [UBC12_HUMAN]	49.18	1	3	7	11	183	20.8866	7.69385
	933	O75366-2	Isoform 2 of Advillin OS=Homo sapiens GN=AVIL - [AVIL_HUMAN]	49.14	2	1	28	80	812	91.1058	5.80811
	934	Q9Y2K3	Myosin-15 OS=Homo sapiens GN=MYH15 PE=1 SV=5 - [MYH15_HUMAN]	49.13	1	1	76	188	1946	224.479	5.84619
	935	P28290-3	Isoform 3 of Sperm-specific antigen 2 OS=Homo sapiens GN=SSFA2 - [SSFA2_HUMAN]	49.12	3	1	42	107	1256	137.773	5.08447
	936	Q9HBH5	Retinol dehydrogenase 14 OS=Homo sapiens GN=RDH14 PE=1 SV=1 - [RDH14_HUMAN]	49.11	1	1	12	30	336	36.8414	8.79248
	937	Q96T76-8	Isoform 5 of MMS19 nucleotide excision repair protein homolog OS=Homo sapiens GN=MMS19 - [MMS19_HUMAN]	49.1	4	1	34	75	1051	115.631	6.52197
	938	Q96IC2	Putative RNA exonuclease NEF-sp OS=Homo sapiens GN=44M2.3 PE=2 SV=1 - [REXON_HUMAN]	49.1	2	1	26	43	774	86.8305	8.32373
	939	P16070-7	Isoform 7 of CD44 antigen OS=Homo sapiens GN=CD44 - [CD44_HUMAN]	49.09	18	8	26	146	713	78.3971	5.43994
	940	A3KMH1-3	Isoform 3 of von Willebrand factor A domain-containing protein 8 OS=Homo sapiens GN=VWA8 - [VWA8_HUMAN]	49.09	2	1	67	160	1872	210.791	6.99072
	941	P55082-2	Isoform 2 of Microfibril-associated glycoprotein 3 OS=Homo sapiens GN=MFAP3 - [MFAP3_HUMAN]	49.07	1	1	9	30	216	24.061	4.94482
	942	P11940	Polyadenylate-binding protein 1 OS=Homo sapiens GN=PABPC1 PE=1 SV=2 - [PABP1_HUMAN]	49.06	9	3	23	78	636	70.6259	9.49561
	943	P47989	Xanthine dehydrogenase/oxidase OS=Homo sapiens GN=XDH PE=1 SV=4 - [XDH_HUMAN]	49.06	1	1	45	96	1333	146.33	7.66455
	944	Q9NVI1-2	Isoform 2 of Fanconi anemia group I protein OS=Homo sapiens GN=FANCI - [FANCI_HUMAN]	49.01	3	1	38	103	1267	142.35	6.81494
	945	A6NKF1	SAC3 domain-containing protein 1 OS=Homo sapiens GN=SAC3D1 PE=1 SV=2 - [SAC31_HUMAN]	49.01	1	1	16	29	404	43.5258	8.68994
	946	P26006	Integrin alpha-3 OS=Homo sapiens GN=ITGA3 PE=1 SV=5 - [ITA3_HUMAN]	49	2	18	42	348	1051	116.538	6.771
	947	P09493-5	Isoform 5 of Tropomyosin alpha-1 chain OS=Homo sapiens GN=TPM1 - [TPM1_HUMAN]	48.98	10	2	16	69	245	28.3685	4.76709
	948	Q99798	Aconitate hydratase, mitochondrial OS=Homo sapiens GN=ACO2 PE=1 SV=2 - [ACON_HUMAN]	48.97	1	1	25	47	780	85.3719	7.60596
	949	P21817	Ryanodine receptor 1 OS=Homo sapiens GN=RYR1 PE=1 SV=3 - [RYR1_HUMAN]	48.97	3	6	175	488	5038	564.815	5.30029
	950	Q9UI09	NADH dehydrogenase [ubiquinone] 1 alpha subcomplex subunit 12 OS=Homo sapiens GN=NDUFA12 PE=1 SV=1 - [NDUAC_HUMAN]	48.97	1	1	5	13	145	17.1036	9.62744
	951	Q07021	Complement component 1 Q subcomponent-binding protein, mitochondrial OS=Homo sapiens GN=C1QBP PE=1 SV=1 - [C1QBP_HUMAN]	48.94	1	3	8	23	282	31.3426	4.84326
	952	P08253	72 kDa type IV collagenase OS=Homo sapiens GN=MMP2 PE=1 SV=2 - [MMP2_HUMAN]	48.94	3	14	31	82	660	73.8347	5.46533
	953	Q96LP2	Protein FAM81B OS=Homo sapiens GN=FAM81B PE=2 SV=3 - [FA81B_HUMAN]	48.89	1	1	17	31	452	52.0001	9.1001
	954	P15884-7	Isoform G- of Transcription factor 4 OS=Homo sapiens GN=TCF4 - [ITF2_HUMAN]	48.83	2	1	15	25	596	64.0761	7.72314
	955	P21246	Pleiotrophin OS=Homo sapiens GN=PTN PE=1 SV=1 - [PTN_HUMAN]	48.81	1	1	8	11	168	18.9297	9.59814
	956	Q7Z736	Pleckstrin homology domain-containing family H member 3 OS=Homo sapiens GN=PLEKHH3 PE=1 SV=2 - [PKHH3_HUMAN]	48.8	4	1	25	64	793	85.2641	7.82568
	957	Q8NH06	Olfactory receptor 1P1 OS=Homo sapiens GN=OR1P1 PE=2 SV=2 - [OR1P1_HUMAN]	48.79	1	1	9	23	330	36.6139	8.03076
	958	Q9UL41-2	Isoform 2 of Paraneoplastic antigen Ma3 OS=Homo sapiens GN=PNMA3 - [PNMA3_HUMAN]	48.79	2	1	18	39	455	51.5098	9.05615
	959	Q9P2D8-3	Isoform 3 of Protein unc-79 homolog OS=Homo sapiens GN=UNC79 - [UNC79_HUMAN]	48.78	3	1	82	203	2657	297.378	6.30322
	960	Q96HE7	ERO1-like protein alpha OS=Homo sapiens GN=ERO1L PE=1 SV=2 - [ERO1A_HUMAN]	48.72	1	1	16	25	468	54.3581	5.68115
	961	P27708	CAD protein OS=Homo sapiens GN=CAD PE=1 SV=3 - [PYR1_HUMAN]	48.72	1	3	62	136	2225	242.829	6.45557
	962	Q8NE63	Homeodomain-interacting protein kinase 4 OS=Homo sapiens GN=HIPK4 PE=2 SV=1 - [HIPK4_HUMAN]	48.7	1	1	21	46	616	69.381	6.65381
	963	Q8NDH2	Coiled-coil domain-containing protein 168 OS=Homo sapiens GN=CCDC168 PE=2 SV=2 - [CC168_HUMAN]	48.69	1	2	91	183	2452	277.778	9.30518
	964	P0C7V5	Putative zinc finger protein 812 OS=Homo sapiens GN=ZNF812 PE=5 SV=1 - [ZN812_HUMAN]	48.68	1	1	15	25	454	51.4842	8.38232
	965	Q9NXL2-2	Isoform 2 of Rho guanine nucleotide exchange factor 38 OS=Homo sapiens GN=ARHGEF38 - [ARH38_HUMAN]	48.65	1	1	21	41	777	89.0212	6.25244
	966	P63211	Guanine nucleotide-binding protein G(T) subunit gamma-T1 OS=Homo sapiens GN=GNGT1 PE=2 SV=2 - [GBG1_HUMAN]	48.65	2	1	4	13	74	8.49032	4.81787
	967	P13645	Keratin, type I cytoskeletal 10 OS=Homo sapiens GN=KRT10 PE=1 SV=6 - [K1C10_HUMAN]	48.63	5	2	19	35	584	58.7917	5.21143
	968	Q14141	Septin-6 OS=Homo sapiens GN=SEPT6 PE=1 SV=4 - [SEPT6_HUMAN]	48.62	10	1	19	58	434	49.6853	6.66846
	969	Q02297	Pro-neuregulin-1, membrane-bound isoform OS=Homo sapiens GN=NRG1 PE=1 SV=3 - [NRG1_HUMAN]	48.59	7	1	19	33	640	70.3479	8.79248
	970	P63010	AP-2 complex subunit beta OS=Homo sapiens GN=AP2B1 PE=1 SV=1 - [AP2B1_HUMAN]	48.56	7	14	35	142	937	104.486	5.37646
	971	P28827	Receptor-type tyrosine-protein phosphatase mu OS=Homo sapiens GN=PTPRM PE=1 SV=2 - [PTPRM_HUMAN]	48.55	2	1	44	96	1452	163.578	6.65381
	972	Q8WZ94	Olfactory receptor 5P3 OS=Homo sapiens GN=OR5P3 PE=2 SV=1 - [OR5P3_HUMAN]	48.55	1	1	8	15	311	34.2727	8.30908
	973	Q16650	T-box brain protein 1 OS=Homo sapiens GN=TBR1 PE=1 SV=1 - [TBR1_HUMAN]	48.53	1	1	20	62	682	74.007	7.32764
	974	A8MVX0-2	Isoform 2 of Rho guanine nucleotide exchange factor 33 OS=Homo sapiens GN=ARHGEF33 - [ARG33_HUMAN]	48.51	2	1	31	68	870	97.4631	6.81494
	975	Q9HC77	Centromere protein J OS=Homo sapiens GN=CENPJ PE=1 SV=2 - [CENPJ_HUMAN]	48.51	1	1	47	130	1338	152.906	6.60986
	976	Q569K4-3	Isoform 3 of Zinc finger protein 385B OS=Homo sapiens GN=ZNF385B - [Z385B_HUMAN]	48.51	1	1	11	34	369	39.2354	9.93506
	977	Q14571	Inositol 1,4,5-trisphosphate receptor type 2 OS=Homo sapiens GN=ITPR2 PE=1 SV=2 - [ITPR2_HUMAN]	48.5	1	2	99	227	2701	307.867	6.43018
	978	P31327	Carbamoyl-phosphate synthase [ammonia], mitochondrial OS=Homo sapiens GN=CPS1 PE=1 SV=2 - [CPSM_HUMAN]	48.47	3	1	52	143	1500	164.835	6.7417
	979	P0CG39	POTE ankyrin domain family member J OS=Homo sapiens GN=POTEJ PE=3 SV=1 - [POTEJ_HUMAN]	48.46	1	2	36	276	1038	117.315	5.97314
	980	Q14644	Ras GTPase-activating protein 3 OS=Homo sapiens GN=RASA3 PE=1 SV=3 - [RASA3_HUMAN]	48.44	1	4	28	79	834	95.6382	7.15186
	981	P08237-3	Isoform 3 of 6-phosphofructokinase, muscle type OS=Homo sapiens GN=PFKM - [K6PF_HUMAN]	48.41	3	1	28	111	851	93.1945	7.97217
	982	Q8WV44	E3 ubiquitin-protein ligase TRIM41 OS=Homo sapiens GN=TRIM41 PE=1 SV=3 - [TRI41_HUMAN]	48.41	3	1	21	53	630	71.6247	5.05908
	983	Q96Q15	Serine/threonine-protein kinase SMG1 OS=Homo sapiens GN=SMG1 PE=1 SV=3 - [SMG1_HUMAN]	48.4	4	1	123	261	3661	410.241	6.45557
	984	Q9Y376	Calcium-binding protein 39 OS=Homo sapiens GN=CAB39 PE=1 SV=1 - [CAB39_HUMAN]	48.39	2	6	14	58	341	39.8437	6.88818
	985	P10620	Microsomal glutathione S-transferase 1 OS=Homo sapiens GN=MGST1 PE=1 SV=1 - [MGST1_HUMAN]	48.39	2	3	6	32	155	17.5872	9.39307
	986	Q96RE9	Zinc finger protein 300 OS=Homo sapiens GN=ZNF300 PE=2 SV=1 - [ZN300_HUMAN]	48.34	4	1	22	67	604	68.6991	8.70459
	987	O60518	Ran-binding protein 6 OS=Homo sapiens GN=RANBP6 PE=1 SV=2 - [RNBP6_HUMAN]	48.33	1	1	37	78	1105	124.633	5.0083
	988	P19367-3	Isoform 3 of Hexokinase-1 OS=Homo sapiens GN=HK1 - [HXK1_HUMAN]	48.32	5	7	38	109	921	102.672	6.75635
	989	Q8N5V2	Ephexin-1 OS=Homo sapiens GN=NGEF PE=2 SV=2 - [NGEF_HUMAN]	48.31	3	1	28	65	710	82.4447	5.56689
	990	O95521	PRAME family member 1 OS=Homo sapiens GN=PRAMEF1 PE=2 SV=2 - [PRAM1_HUMAN]	48.31	1	1	18	41	474	55.126	8.60205
	991	P02647	Apolipoprotein A-I OS=Homo sapiens GN=APOA1 PE=1 SV=1 - [APOA1_HUMAN]	48.31	1	1	10	11	267	30.7589	5.75732
	992	Q96GW7	Brevican core protein OS=Homo sapiens GN=BCAN PE=1 SV=2 - [PGCB_HUMAN]	48.3	2	2	28	67	911	99.056	4.64014
	993	Q9Y4F5	Centrosomal protein of 170 kDa protein B OS=Homo sapiens GN=CEP170B PE=1 SV=4 - [C170B_HUMAN]	48.27	3	1	54	121	1589	171.584	6.84424
	994	Q69YW2	Uncharacterized membrane protein C1orf95 OS=Homo sapiens GN=C1orf95 PE=2 SV=1 - [CA095_HUMAN]	48.23	1	1	3	4	141	14.9968	7.21045
	995	Q9H0M0-3	Isoform 3 of NEDD4-like E3 ubiquitin-protein ligase WWP1 OS=Homo sapiens GN=WWP1 - [WWP1_HUMAN]	48.23	3	1	27	66	792	91.4902	6.46826
	996	P42695	Condensin-2 complex subunit D3 OS=Homo sapiens GN=NCAPD3 PE=1 SV=2 - [CNDD3_HUMAN]	48.2	1	1	46	106	1498	168.783	7.50342
	997	Q8NI35	InaD-like protein OS=Homo sapiens GN=INADL PE=1 SV=3 - [INADL_HUMAN]	48.2	4	1	63	134	1801	196.247	4.94482
	998	O14763-2	Isoform Short of Tumor necrosis factor receptor superfamily member 10B OS=Homo sapiens GN=TNFRSF10B - [TR10B_HUMAN]	48.18	2	2	15	27	411	45.0544	5.65576
	999	Q96JX3	Protein SERAC1 OS=Homo sapiens GN=SERAC1 PE=1 SV=1 - [SRAC1_HUMAN]	48.17	1	1	26	54	654	74.1002	7.6792
	1000	O60812	Heterogeneous nuclear ribonucleoprotein C-like 1 OS=Homo sapiens GN=HNRNPCL1 PE=1 SV=1 - [HNRCL_HUMAN]	48.12	5	1	13	41	293	32.1227	5.05908
	1001	P98164	Low-density lipoprotein receptor-related protein 2 OS=Homo sapiens GN=LRP2 PE=1 SV=3 - [LRP2_HUMAN]	48.12	1	1	138	296	4655	521.616	5.08447
	1002	Q9Y5G1	Protocadherin gamma-B3 OS=Homo sapiens GN=PCDHGB3 PE=2 SV=3 - [PCDGF_HUMAN]	48.12	6	2	27	39	929	101.17	5.0083
	1003	Q9HB55	Cytochrome P450 3A43 OS=Homo sapiens GN=CYP3A43 PE=1 SV=1 - [CP343_HUMAN]	48.11	4	1	17	63	503	57.6322	8.104
	1004	Q96BY6-3	Isoform 3 of Dedicator of cytokinesis protein 10 OS=Homo sapiens GN=DOCK10 - [DOC10_HUMAN]	48.03	3	1	74	184	2180	249.333	7.1665
	1005	O95248-4	Isoform 4 of Myotubularin-related protein 5 OS=Homo sapiens GN=SBF1 - [MTMR5_HUMAN]	48.02	2	1	60	162	1893	210.916	7.10791
	1006	P23458	Tyrosine-protein kinase JAK1 OS=Homo sapiens GN=JAK1 PE=1 SV=2 - [JAK1_HUMAN]	48.01	1	2	39	110	1154	133.191	7.54736
	1007	P08567	Pleckstrin OS=Homo sapiens GN=PLEK PE=1 SV=3 - [PLEK_HUMAN]	48	1	1	11	24	350	40.0994	8.27979
	1008	Q8NF91	Nesprin-1 OS=Homo sapiens GN=SYNE1 PE=1 SV=4 - [SYNE1_HUMAN]	47.99	5	2	300	612	8797	1010.46	5.52881
	1009	Q9H3Z4	DnaJ homolog subfamily C member 5 OS=Homo sapiens GN=DNAJC5 PE=1 SV=1 - [DNJC5_HUMAN]	47.98	2	2	5	17	198	22.1343	5.07178
	1010	Q96FW1	Ubiquitin thioesterase OTUB1 OS=Homo sapiens GN=OTUB1 PE=1 SV=2 - [OTUB1_HUMAN]	47.97	2	3	9	19	271	31.2644	4.94482
	1011	Q9Y295	Developmentally-regulated GTP-binding protein 1 OS=Homo sapiens GN=DRG1 PE=1 SV=1 - [DRG1_HUMAN]	47.96	1	1	13	40	367	40.5168	8.89502
	1012	Q9H093	NUAK family SNF1-like kinase 2 OS=Homo sapiens GN=NUAK2 PE=1 SV=1 - [NUAK2_HUMAN]	47.93	1	1	18	28	628	69.5689	8.86572
	1013	B5ME19	Eukaryotic translation initiation factor 3 subunit C-like protein OS=Homo sapiens GN=EIF3CL PE=2 SV=1 - [EIFCL_HUMAN]	47.92	2	8	34	116	914	105.407	5.64307
	1014	P02549	Spectrin alpha chain, erythrocytic 1 OS=Homo sapiens GN=SPTA1 PE=1 SV=5 - [SPTA1_HUMAN]	47.91	2	2	81	204	2419	279.842	5.04639
	1015	O43581-2	Isoform 2 of Synaptotagmin-7 OS=Homo sapiens GN=SYT7 - [SYT7_HUMAN]	47.91	2	1	14	29	478	52.7875	9.39307
	1016	P49959	Double-strand break repair protein MRE11A OS=Homo sapiens GN=MRE11A PE=1 SV=3 - [MRE11_HUMAN]	47.88	2	1	24	52	708	80.5433	5.89697
	1017	O60245-3	Isoform C of Protocadherin-7 OS=Homo sapiens GN=PCDH7 - [PCDH7_HUMAN]	47.83	3	1	29	62	1200	130.223	5.18604
	1018	Q8WWL7	G2/mitotic-specific cyclin-B3 OS=Homo sapiens GN=CCNB3 PE=1 SV=2 - [CCNB3_HUMAN]	47.74	1	1	49	100	1395	157.816	6.68311
	1019	P11047	Laminin subunit gamma-1 OS=Homo sapiens GN=LAMC1 PE=1 SV=3 - [LAMC1_HUMAN]	47.73	1	5	56	142	1609	177.489	5.12256
	1020	O15072	A disintegrin and metalloproteinase with thrombospondin motifs 3 OS=Homo sapiens GN=ADAMTS3 PE=2 SV=4 - [ATS3_HUMAN]	47.72	1	1	37	71	1205	135.515	7.15186
	1021	O43795	Unconventional myosin-Ib OS=Homo sapiens GN=MYO1B PE=1 SV=3 - [MYO1B_HUMAN]	47.71	9	7	50	113	1136	131.902	9.37842
	1022	Q8TB73	Protein NDNF OS=Homo sapiens GN=NDNF PE=2 SV=2 - [NDNF_HUMAN]	47.71	1	1	17	28	568	64.6323	8.93896
	1023	Q68DI1	Zinc finger protein 776 OS=Homo sapiens GN=ZNF776 PE=2 SV=2 - [ZN776_HUMAN]	47.68	1	1	24	44	518	59.5746	8.32373
	1024	O95171	Sciellin OS=Homo sapiens GN=SCEL PE=1 SV=2 - [SCEL_HUMAN]	47.67	3	1	31	84	688	77.5044	9.37842
	1025	Q5T4S7-2	Isoform 2 of E3 ubiquitin-protein ligase UBR4 OS=Homo sapiens GN=UBR4 - [UBR4_HUMAN]	47.67	5	3	165	391	5204	575.592	6.01123
	1026	P30048	Thioredoxin-dependent peroxide reductase, mitochondrial OS=Homo sapiens GN=PRDX3 PE=1 SV=3 - [PRDX3_HUMAN]	47.66	1	2	8	42	256	27.6752	7.78174
	1027	Q13561	Dynactin subunit 2 OS=Homo sapiens GN=DCTN2 PE=1 SV=4 - [DCTN2_HUMAN]	47.63	3	1	15	26	401	44.2039	5.21143
	1028	Q16531	DNA damage-binding protein 1 OS=Homo sapiens GN=DDB1 PE=1 SV=1 - [DDB1_HUMAN]	47.63	1	1	33	71	1140	126.887	5.26221
	1029	P34947	G protein-coupled receptor kinase 5 OS=Homo sapiens GN=GRK5 PE=1 SV=1 - [GRK5_HUMAN]	47.63	1	1	23	55	590	67.7433	8.104
	1030	P80303	Nucleobindin-2 OS=Homo sapiens GN=NUCB2 PE=1 SV=2 - [NUCB2_HUMAN]	47.62	2	1	16	29	420	50.1643	5.12256
	1031	P99999	Cytochrome c OS=Homo sapiens GN=CYCS PE=1 SV=2 - [CYC_HUMAN]	47.62	1	1	5	11	105	11.7411	9.56885
	1032	Q9BUB4	tRNA-specific adenosine deaminase 1 OS=Homo sapiens GN=ADAT1 PE=1 SV=1 - [ADAT1_HUMAN]	47.61	2	1	19	31	502	55.3573	9.01221
	1033	Q9Y6J8	Serine/threonine/tyrosine-interacting-like protein 1 OS=Homo sapiens GN=STYXL1 PE=2 SV=1 - [STYL1_HUMAN]	47.6	2	1	9	17	313	35.7951	6.13818
	1034	P23381	Tryptophan--tRNA ligase, cytoplasmic OS=Homo sapiens GN=WARS PE=1 SV=2 - [SYWC_HUMAN]	47.56	2	2	14	29	471	53.1316	6.22705
	1035	Q6NXP0	EF-hand calcium-binding domain-containing protein 12 OS=Homo sapiens GN=EFCAB12 PE=2 SV=1 - [EFC12_HUMAN]	47.55	1	1	22	46	572	66.5085	9.46631
	1036	Q2M3V2	Ankyrin repeat domain-containing protein SOWAHA OS=Homo sapiens GN=SOWAHA PE=1 SV=3 - [SWAHA_HUMAN]	47.54	1	1	16	56	549	57.4074	10.1841
	1037	Q96JB1-2	Isoform 2 of Dynein heavy chain 8, axonemal OS=Homo sapiens GN=DNAH8 - [DYH8_HUMAN]	47.53	2	1	144	325	4454	510.122	6.29053
	1038	P05026-2	Isoform 2 of Sodium/potassium-transporting ATPase subunit beta-1 OS=Homo sapiens GN=ATP1B1 - [AT1B1_HUMAN]	47.51	2	5	11	41	301	34.8708	8.646
	1039	P14616	Insulin receptor-related protein OS=Homo sapiens GN=INSRR PE=1 SV=2 - [INSRR_HUMAN]	47.49	1	1	40	62	1297	143.628	6.46826
	1040	Q14139	Ubiquitin conjugation factor E4 A OS=Homo sapiens GN=UBE4A PE=1 SV=2 - [UBE4A_HUMAN]	47.47	2	2	34	107	1066	122.482	5.23682
	1041	P29692-2	Isoform 2 of Elongation factor 1-delta OS=Homo sapiens GN=EEF1D - [EF1D_HUMAN]	47.45	4	4	22	56	647	71.3641	6.41748
	1042	O60282	Kinesin heavy chain isoform 5C OS=Homo sapiens GN=KIF5C PE=1 SV=1 - [KIF5C_HUMAN]	47.44	2	1	41	128	957	109.427	6.18896
	1043	Q15303-4	Isoform JM-B CYT-2 of Receptor tyrosine-protein kinase erbB-4 OS=Homo sapiens GN=ERBB4 - [ERBB4_HUMAN]	47.43	4	1	39	108	1282	143.875	6.23975
	1044	P02792	Ferritin light chain OS=Homo sapiens GN=FTL PE=1 SV=2 - [FRIL_HUMAN]	47.43	1	1	7	19	175	20.0071	5.78271
	1045	P62081	40S ribosomal protein S7 OS=Homo sapiens GN=RPS7 PE=1 SV=1 - [RS7_HUMAN]	47.42	1	4	11	37	194	22.1133	10.0962
	1046	P53621	Coatomer subunit alpha OS=Homo sapiens GN=COPA PE=1 SV=2 - [COPA_HUMAN]	47.39	2	6	45	92	1224	138.258	7.66455
	1047	Q9P225	Dynein heavy chain 2, axonemal OS=Homo sapiens GN=DNAH2 PE=2 SV=3 - [DYH2_HUMAN]	47.39	2	1	140	420	4427	507.375	6.3667
	1048	Q9P121-2	Isoform 2 of Neurotrimin OS=Homo sapiens GN=NTM - [NTRI_HUMAN]	47.38	1	1	11	19	344	37.9303	7.85498
	1049	O75417	DNA polymerase theta OS=Homo sapiens GN=POLQ PE=1 SV=2 - [DPOLQ_HUMAN]	47.37	1	1	88	160	2590	289.437	7.35693
	1050	Q14498	RNA-binding protein 39 OS=Homo sapiens GN=RBM39 PE=1 SV=2 - [RBM39_HUMAN]	47.36	3	1	22	115	530	59.3427	10.0962
	1051	P19623	Spermidine synthase OS=Homo sapiens GN=SRM PE=1 SV=1 - [SPEE_HUMAN]	47.35	1	2	8	14	302	33.8027	5.49072
	1052	Q9P0M6	Core histone macro-H2A.2 OS=Homo sapiens GN=H2AFY2 PE=1 SV=3 - [H2AW_HUMAN]	47.31	1	1	13	68	372	40.0334	9.68604
	1053	Q12789-3	Isoform 2 of General transcription factor 3C polypeptide 1 OS=Homo sapiens GN=GTF3C1 - [TF3C1_HUMAN]	47.31	2	1	66	126	2084	236.129	7.51807
	1054	P48637	Glutathione synthetase OS=Homo sapiens GN=GSS PE=1 SV=1 - [GSHB_HUMAN]	47.26	2	1	17	27	474	52.3523	5.92236
	1055	O60462	Neuropilin-2 OS=Homo sapiens GN=NRP2 PE=1 SV=2 - [NRP2_HUMAN]	47.26	6	4	34	83	931	104.792	5.17334
	1056	Q9ULV4-3	Isoform 3 of Coronin-1C OS=Homo sapiens GN=CORO1C - [COR1C_HUMAN]	47.25	3	8	17	83	527	58.9098	7.75244
	1057	O15042	U2 snRNP-associated SURP motif-containing protein OS=Homo sapiens GN=U2SURP PE=1 SV=2 - [SR140_HUMAN]	47.23	2	1	29	77	1029	118.219	8.47021
	1058	Q86U86-8	Isoform 8 of Protein polybromo-1 OS=Homo sapiens GN=PBRM1 - [PB1_HUMAN]	47.22	9	1	68	193	1652	189.525	6.96143
	1059	Q9UDR5	Alpha-aminoadipic semialdehyde synthase, mitochondrial OS=Homo sapiens GN=AASS PE=1 SV=1 - [AASS_HUMAN]	47.19	1	1	37	84	926	102.066	6.63916
	1060	Q9ULI4	Kinesin-like protein KIF26A OS=Homo sapiens GN=KIF26A PE=2 SV=3 - [KI26A_HUMAN]	47.18	1	1	57	143	1882	194.468	8.80713
	1061	Q13402-5	Isoform 5 of Unconventional myosin-VIIa OS=Homo sapiens GN=MYO7A - [MYO7A_HUMAN]	47.18	7	2	67	142	2092	240.488	8.76318
	1062	P58107	Epiplakin OS=Homo sapiens GN=EPPK1 PE=1 SV=2 - [EPIPL_HUMAN]	47.17	1	1	84	215	5090	555.279	5.60498
	1063	Q9UIW2	Plexin-A1 OS=Homo sapiens GN=PLXNA1 PE=1 SV=3 - [PLXA1_HUMAN]	47.1	4	4	55	90	1896	210.933	6.91748
	1064	Q2LD37-4	Isoform 4 of Uncharacterized protein KIAA1109 OS=Homo sapiens GN=KIAA1109 - [K1109_HUMAN]	47.06	6	1	150	316	5004	555.005	6.58057
	1065	Q9UHW9-4	Isoform 4 of Solute carrier family 12 member 6 OS=Homo sapiens GN=SLC12A6 - [S12A6_HUMAN]	47.06	13	2	40	89	1141	126.512	7.06396
	1066	Q8NGX2	Olfactory receptor 2T35 OS=Homo sapiens GN=OR2T35 PE=2 SV=1 - [O2T35_HUMAN]	47.06	2	1	10	30	323	36.0768	8.73389
	1067	Q8TEJ3	SH3 domain-containing RING finger protein 3 OS=Homo sapiens GN=SH3RF3 PE=1 SV=2 - [SH3R3_HUMAN]	47.05	1	1	23	47	882	92.7182	8.83643
	1068	O95347	Structural maintenance of chromosomes protein 2 OS=Homo sapiens GN=SMC2 PE=1 SV=2 - [SMC2_HUMAN]	47.03	2	1	44	108	1197	135.572	8.42627
	1069	P56545-2	Isoform 2 of C-terminal-binding protein 2 OS=Homo sapiens GN=CTBP2 - [CTBP2_HUMAN]	47.01	1	1	30	53	985	106.121	8.01611
	1070	A6NHG4	D-dopachrome decarboxylase-like protein OS=Homo sapiens GN=DDTL PE=2 SV=1 - [DDTL_HUMAN]	47.01	2	1	5	7	134	14.1863	6.29053
	1071	Q8IVT2	Mitotic interactor and substrate of PLK1 OS=Homo sapiens GN=MISP PE=1 SV=1 - [MISP_HUMAN]	46.98	1	1	23	69	679	75.311	6.82959
	1072	O75161	Nephrocystin-4 OS=Homo sapiens GN=NPHP4 PE=1 SV=2 - [NPHP4_HUMAN]	46.98	1	1	39	81	1426	157.499	8.1333
	1073	Q7Z553	MAM domain-containing glycosylphosphatidylinositol anchor protein 2 OS=Homo sapiens GN=MDGA2 PE=2 SV=2 - [MDGA2_HUMAN]	46.97	3	2	25	53	956	107.368	7.1958
	1074	P28070	Proteasome subunit beta type-4 OS=Homo sapiens GN=PSMB4 PE=1 SV=4 - [PSB4_HUMAN]	46.97	1	1	10	30	264	29.1855	5.97314
	1075	O75044	SLIT-ROBO Rho GTPase-activating protein 2 OS=Homo sapiens GN=SRGAP2 PE=1 SV=2 - [SRGP2_HUMAN]	46.97	4	2	32	70	1071	120.805	6.69775
	1076	P55884-2	Isoform 2 of Eukaryotic translation initiation factor 3 subunit B OS=Homo sapiens GN=EIF3B - [EIF3B_HUMAN]	46.96	2	6	28	56	873	98.9671	5.08447
	1077	P46821	Microtubule-associated protein 1B OS=Homo sapiens GN=MAP1B PE=1 SV=2 - [MAP1B_HUMAN]	46.96	3	7	78	202	2468	270.468	4.80518
	1078	Q9BQB4	Sclerostin OS=Homo sapiens GN=SOST PE=1 SV=1 - [SOST_HUMAN]	46.95	1	1	10	25	213	24.0152	9.24658
	1079	P17252	Protein kinase C alpha type OS=Homo sapiens GN=PRKCA PE=1 SV=4 - [KPCA_HUMAN]	46.88	3	5	28	61	672	76.7001	7.04932
	1080	Q6ZMK1-3	Isoform 3 of Cysteine and histidine-rich protein 1 OS=Homo sapiens GN=CYHR1 - [CYHR1_HUMAN]	46.88	1	1	4	13	192	19.9364	6.50732
	1081	Q07864	DNA polymerase epsilon catalytic subunit A OS=Homo sapiens GN=POLE PE=1 SV=5 - [DPOE1_HUMAN]	46.85	1	1	77	152	2286	261.351	6.39209
	1082	O75343	Guanylate cyclase soluble subunit beta-2 OS=Homo sapiens GN=GUCY1B2 PE=2 SV=2 - [GCYB2_HUMAN]	46.84	1	1	20	71	617	70.3222	8.63135
	1083	Q70CQ2	Ubiquitin carboxyl-terminal hydrolase 34 OS=Homo sapiens GN=USP34 PE=1 SV=2 - [UBP34_HUMAN]	46.84	3	2	97	268	3546	403.973	5.8208
	1084	Q8N3D4	EH domain-binding protein 1-like protein 1 OS=Homo sapiens GN=EHBP1L1 PE=1 SV=2 - [EH1L1_HUMAN]	46.82	1	1	50	125	1523	161.756	4.83057
	1085	P30679	Guanine nucleotide-binding protein subunit alpha-15 OS=Homo sapiens GN=GNA15 PE=1 SV=2 - [GNA15_HUMAN]	46.79	1	1	16	30	374	43.5402	8.51416
	1086	Q15746-6	Isoform Del-1790 of Myosin light chain kinase, smooth muscle OS=Homo sapiens GN=MYLK - [MYLK_HUMAN]	46.79	7	2	68	142	1913	210.454	6.18896
	1087	Q9NZQ8	Transient receptor potential cation channel subfamily M member 5 OS=Homo sapiens GN=TRPM5 PE=2 SV=1 - [TRPM5_HUMAN]	46.78	3	2	39	77	1165	131.368	6.771
	1088	Q2TAL6	Brorin OS=Homo sapiens GN=VWC2 PE=2 SV=1 - [VWC2_HUMAN]	46.77	1	1	7	13	325	35.2585	5.37646
	1089	Q9H074	Polyadenylate-binding protein-interacting protein 1 OS=Homo sapiens GN=PAIP1 PE=1 SV=1 - [PAIP1_HUMAN]	46.76	3	1	16	31	479	53.4911	4.80518
	1090	P60228	Eukaryotic translation initiation factor 3 subunit E OS=Homo sapiens GN=EIF3E PE=1 SV=1 - [EIF3E_HUMAN]	46.74	1	6	22	81	445	52.1874	6.03662
	1091	P07195	L-lactate dehydrogenase B chain OS=Homo sapiens GN=LDHB PE=1 SV=2 - [LDHB_HUMAN]	46.71	3	6	14	110	334	36.6151	6.04932
	1092	Q92597	Protein NDRG1 OS=Homo sapiens GN=NDRG1 PE=1 SV=1 - [NDRG1_HUMAN]	46.7	3	2	15	83	394	42.8077	5.8208
	1093	Q9NSD9	Phenylalanine--tRNA ligase beta subunit OS=Homo sapiens GN=FARSB PE=1 SV=3 - [SYFB_HUMAN]	46.69	1	1	23	28	589	66.0735	6.84424
	1094	Q5QJE6	Deoxynucleotidyltransferase terminal-interacting protein 2 OS=Homo sapiens GN=DNTTIP2 PE=1 SV=2 - [TDIF2_HUMAN]	46.69	1	1	22	35	756	84.4179	6.16357
	1095	P84550	SKI family transcriptional corepressor 1 OS=Homo sapiens GN=SKOR1 PE=1 SV=1 - [SKOR1_HUMAN]	46.63	3	1	30	62	965	99.7683	6.53662
	1096	P35504	UDP-glucuronosyltransferase 1-5 OS=Homo sapiens GN=UGT1A5 PE=2 SV=1 - [UD15_HUMAN]	46.63	1	1	13	26	534	60.0318	8.06006
	1097	Q92620	Pre-mRNA-splicing factor ATP-dependent RNA helicase PRP16 OS=Homo sapiens GN=DHX38 PE=1 SV=2 - [PRP16_HUMAN]	46.62	1	1	40	126	1227	140.415	6.53662
	1098	Q02880	DNA topoisomerase 2-beta OS=Homo sapiens GN=TOP2B PE=1 SV=3 - [TOP2B_HUMAN]	46.62	2	1	57	111	1626	183.152	8.00146
	1099	P12645	Bone morphogenetic protein 3 OS=Homo sapiens GN=BMP3 PE=1 SV=2 - [BMP3_HUMAN]	46.61	1	1	14	38	472	53.3386	9.5835
	1100	Q7Z7A1-5	Isoform 5 of Centriolin OS=Homo sapiens GN=CNTRL - [CNTRL_HUMAN]	46.61	3	1	91	215	2319	268.075	5.5542
	1101	Q96T51-3	Isoform 3 of RUN and FYVE domain-containing protein 1 OS=Homo sapiens GN=RUFY1 - [RUFY1_HUMAN]	46.6	1	1	16	47	412	44.4608	6.11279
	1102	P20700	Lamin-B1 OS=Homo sapiens GN=LMNB1 PE=1 SV=2 - [LMNB1_HUMAN]	46.59	1	2	22	70	586	66.3676	5.16064
	1103	Q15149	Plectin OS=Homo sapiens GN=PLEC PE=1 SV=3 - [PLEC_HUMAN]	46.58	9	1	183	400	4684	531.466	5.96045
	1104	Q7Z6K1	THAP domain-containing protein 5 OS=Homo sapiens GN=THAP5 PE=1 SV=2 - [THAP5_HUMAN]	46.58	2	1	11	15	395	45.3879	6.7124
	1105	Q6Q4G3	Aminopeptidase Q OS=Homo sapiens GN=AQPEP PE=1 SV=4 - [AMPQ_HUMAN]	46.57	1	1	30	73	990	113.211	5.63037
	1106	O43909	Exostosin-like 3 OS=Homo sapiens GN=EXTL3 PE=1 SV=1 - [EXTL3_HUMAN]	46.57	1	1	29	69	919	104.682	6.50732
	1107	Q13683-10	Isoform Alpha-7X1X2A of Integrin alpha-7 OS=Homo sapiens GN=ITGA7 - [ITA7_HUMAN]	46.56	5	2	34	89	1162	126.551	5.69385
	1108	Q15058	Kinesin-like protein KIF14 OS=Homo sapiens GN=KIF14 PE=1 SV=1 - [KIF14_HUMAN]	46.54	1	1	58	143	1648	186.375	7.91357
	1109	Q4G0T1	Putative scavenger receptor cysteine-rich domain-containing protein LOC619207 OS=Homo sapiens PE=5 SV=2 - [SRCRM_HUMAN]	46.54	1	1	27	49	1027	108.541	6.15088
	1110	Q9Y2G0	Protein EFR3 homolog B OS=Homo sapiens GN=EFR3B PE=1 SV=2 - [EFR3B_HUMAN]	46.51	3	1	22	52	817	92.4279	6.69775
	1111	Q6ZS86-2	Isoform 2 of Putative glycerol kinase 5 OS=Homo sapiens GN=GK5 - [GLPK5_HUMAN]	46.51	2	1	11	28	301	33.8944	7.7085
	1112	Q9P2J5	Leucine--tRNA ligase, cytoplasmic OS=Homo sapiens GN=LARS PE=1 SV=2 - [SYLC_HUMAN]	46.51	1	3	41	86	1176	134.379	7.29834
	1113	Q8N7C3	Probable E3 ubiquitin-protein ligase TRIML2 OS=Homo sapiens GN=TRIML2 PE=2 SV=1 - [TRIMM_HUMAN]	46.51	1	1	14	34	387	43.9552	5.71924
	1114	Q9Y4K1	Absent in melanoma 1 protein OS=Homo sapiens GN=AIM1 PE=1 SV=3 - [AIM1_HUMAN]	46.49	1	1	52	115	1723	188.558	5.85889
	1115	Q96SN8-3	Isoform 3 of CDK5 regulatory subunit-associated protein 2 OS=Homo sapiens GN=CDK5RAP2 - [CK5P2_HUMAN]	46.49	4	1	58	131	1852	210.341	5.61768
	1116	Q96QK1	Vacuolar protein sorting-associated protein 35 OS=Homo sapiens GN=VPS35 PE=1 SV=2 - [VPS35_HUMAN]	46.48	1	4	27	56	796	91.6489	5.49072
	1117	Q93084-6	Isoform SERCA3D of Sarcoplasmic/endoplasmic reticulum calcium ATPase 3 OS=Homo sapiens GN=ATP2A3 - [AT2A3_HUMAN]	46.46	7	1	29	56	1044	114.057	5.74463
	1118	P36915	Guanine nucleotide-binding protein-like 1 OS=Homo sapiens GN=GNL1 PE=1 SV=2 - [GNL1_HUMAN]	46.46	2	1	17	130	607	68.6185	5.79541
	1119	Q14152	Eukaryotic translation initiation factor 3 subunit A OS=Homo sapiens GN=EIF3A PE=1 SV=1 - [EIF3A_HUMAN]	46.45	1	11	60	156	1382	166.468	6.78564
	1120	O00267-2	Isoform 2 of Transcription elongation factor SPT5 OS=Homo sapiens GN=SUPT5H - [SPT5H_HUMAN]	46.45	2	1	35	97	1083	120.424	5.09717
	1121	Q86W50	Methyltransferase-like protein 16 OS=Homo sapiens GN=METTL16 PE=1 SV=2 - [MET16_HUMAN]	46.44	1	1	18	28	562	63.5808	7.85498
	1122	P09131-2	Isoform 2 of P3 protein OS=Homo sapiens GN=SLC10A3 - [P3_HUMAN]	46.43	2	2	12	44	448	47.5177	7.72314
	1123	P04844	Dolichyl-diphosphooligosaccharide--protein glycosyltransferase subunit 2 OS=Homo sapiens GN=RPN2 PE=1 SV=3 - [RPN2_HUMAN]	46.43	2	3	14	36	631	69.241	5.69385
	1124	P07814	Bifunctional glutamate/proline--tRNA ligase OS=Homo sapiens GN=EPRS PE=1 SV=5 - [SYEP_HUMAN]	46.43	1	3	53	94	1512	170.483	7.32764
	1125	Q6NUS6-3	Isoform 3 of Tectonic-3 OS=Homo sapiens GN=TCTN3 - [TECT3_HUMAN]	46.39	3	1	9	26	429	47.2538	8.52881
	1126	O75131	Copine-3 OS=Homo sapiens GN=CPNE3 PE=1 SV=1 - [CPNE3_HUMAN]	46.37	10	7	21	64	537	60.0921	5.84619
	1127	Q6ZRI8-4	Isoform 4 of Rho GTPase-activating protein 36 OS=Homo sapiens GN=ARHGAP36 - [RHG36_HUMAN]	46.36	4	1	18	30	535	60.5319	9.36377
	1128	Q9Y6A1-2	Isoform 2 of Protein O-mannosyl-transferase 1 OS=Homo sapiens GN=POMT1 - [POMT1_HUMAN]	46.34	4	1	18	31	725	82.5137	8.51416
	1129	Q9Y2D5-6	Isoform 4 of A-kinase anchor protein 2 OS=Homo sapiens GN=AKAP2 - [AKAP2_HUMAN]	46.33	5	1	38	78	1090	120.557	5.04639
	1130	P27448-2	Isoform 2 of MAP/microtubule affinity-regulating kinase 3 OS=Homo sapiens GN=MARK3 - [MARK3_HUMAN]	46.28	7	1	33	103	752	83.9629	9.46631
	1131	Q07020	60S ribosomal protein L18 OS=Homo sapiens GN=RPL18 PE=1 SV=2 - [RL18_HUMAN]	46.28	1	3	9	34	188	21.6211	11.7222
	1132	Q8TE59	A disintegrin and metalloproteinase with thrombospondin motifs 19 OS=Homo sapiens GN=ADAMTS19 PE=2 SV=2 - [ATS19_HUMAN]	46.23	1	1	40	73	1207	133.96	7.56201
	1133	Q9BUN8	Derlin-1 OS=Homo sapiens GN=DERL1 PE=1 SV=1 - [DERL1_HUMAN]	46.22	2	1	9	20	251	28.7818	9.51025
	1134	Q9ULT8	E3 ubiquitin-protein ligase HECTD1 OS=Homo sapiens GN=HECTD1 PE=1 SV=3 - [HECD1_HUMAN]	46.21	1	1	74	171	2610	289.203	5.35107
	1135	P39019	40S ribosomal protein S19 OS=Homo sapiens GN=RPS19 PE=1 SV=2 - [RS19_HUMAN]	46.21	1	2	8	14	145	16.0505	10.3159
	1136	Q9ULM3	YEATS domain-containing protein 2 OS=Homo sapiens GN=YEATS2 PE=1 SV=2 - [YETS2_HUMAN]	46.2	1	1	44	83	1422	150.689	8.98291
	1137	Q8NB25-3	Isoform 3 of Protein FAM184A OS=Homo sapiens GN=FAM184A - [F184A_HUMAN]	46.15	7	2	45	82	1116	130.25	5.89697
	1138	P20073-2	Isoform 2 of Annexin A7 OS=Homo sapiens GN=ANXA7 - [ANXA7_HUMAN]	46.14	2	4	18	43	466	50.2837	6.60986
	1139	A8MZA4	Putative golgin subfamily A member 6-like protein 6 OS=Homo sapiens GN=GOLGA6L6 PE=5 SV=3 - [GG6L6_HUMAN]	46.13	2	1	32	82	750	94.1331	5.12256
	1140	Q13332-3	Isoform PTPS-MEB of Receptor-type tyrosine-protein phosphatase S OS=Homo sapiens GN=PTPRS - [PTPRS_HUMAN]	46.11	7	1	53	115	1928	214.523	6.52197
	1141	Q92729-4	Isoform 4 of Receptor-type tyrosine-protein phosphatase U OS=Homo sapiens GN=PTPRU - [PTPRU_HUMAN]	46.11	1	1	43	110	1440	161.545	6.94678
	1142	P61586	Transforming protein RhoA OS=Homo sapiens GN=RHOA PE=1 SV=1 - [RHOA_HUMAN]	46.11	1	1	9	111	193	21.7541	6.1001
	1143	P53794	Sodium/myo-inositol cotransporter OS=Homo sapiens GN=SLC5A3 PE=3 SV=2 - [SC5A3_HUMAN]	46.1	1	2	20	96	718	79.6413	7.26904
	1144	O95477	ATP-binding cassette sub-family A member 1 OS=Homo sapiens GN=ABCA1 PE=1 SV=3 - [ABCA1_HUMAN]	46.09	1	1	83	173	2261	254.139	6.85889
	1145	Q9Y2H5	Pleckstrin homology domain-containing family A member 6 OS=Homo sapiens GN=PLEKHA6 PE=1 SV=4 - [PKHA6_HUMAN]	46.09	1	2	40	103	1048	117.056	9.1001
	1146	Q86VV8	Rotatin OS=Homo sapiens GN=RTTN PE=1 SV=3 - [RTTN_HUMAN]	46.09	4	1	68	216	2226	248.47	6.69775
	1147	P62070	Ras-related protein R-Ras2 OS=Homo sapiens GN=RRAS2 PE=1 SV=1 - [RRAS2_HUMAN]	46.08	3	2	11	50	204	23.3847	6.01123
	1148	Q9Y4I1-3	Isoform 3 of Unconventional myosin-Va OS=Homo sapiens GN=MYO5A - [MYO5A_HUMAN]	46.06	3	1	74	239	1880	218.469	8.51416
	1149	Q9BSJ8-2	Isoform 2 of Extended synaptotagmin-1 OS=Homo sapiens GN=ESYT1 - [ESYT1_HUMAN]	46.05	2	2	34	94	1114	123.925	5.78271
	1150	P50552	Vasodilator-stimulated phosphoprotein OS=Homo sapiens GN=VASP PE=1 SV=3 - [VASP_HUMAN]	46.05	1	1	16	38	380	39.8051	8.93896
	1151	P15144	Aminopeptidase N OS=Homo sapiens GN=ANPEP PE=1 SV=4 - [AMPN_HUMAN]	46.02	1	1	27	49	967	109.471	5.47803
	1152	Q7Z6J8	E3 ubiquitin-protein ligase E3D OS=Homo sapiens GN=UBE3D PE=1 SV=2 - [UBE3D_HUMAN]	46.02	1	1	10	27	389	43.6283	8.1333
	1153	P37837	Transaldolase OS=Homo sapiens GN=TALDO1 PE=1 SV=2 - [TALDO_HUMAN]	45.99	1	3	14	43	337	37.5165	6.81494
	1154	Q8IZU2	WD repeat-containing protein 17 OS=Homo sapiens GN=WDR17 PE=2 SV=2 - [WDR17_HUMAN]	45.99	2	1	32	68	1322	147.608	6.45557
	1155	Q92616	Translational activator GCN1 OS=Homo sapiens GN=GCN1L1 PE=1 SV=6 - [GCN1L_HUMAN]	45.98	1	1	90	205	2671	292.572	7.47412
	1156	Q9Y330	Zinc finger and BTB domain-containing protein 12 OS=Homo sapiens GN=ZBTB12 PE=1 SV=1 - [ZBT12_HUMAN]	45.97	1	1	17	32	459	49.1162	7.50342
	1157	Q15334	Lethal(2) giant larvae protein homolog 1 OS=Homo sapiens GN=LLGL1 PE=1 SV=3 - [L2GL1_HUMAN]	45.96	1	6	34	74	1064	115.346	6.29053
	1158	P30626-2	Isoform 2 of Sorcin OS=Homo sapiens GN=SRI - [SORCN_HUMAN]	45.9	2	3	10	32	183	20.3318	5.33838
	1159	P29120-2	Isoform 2 of Neuroendocrine convertase 1 OS=Homo sapiens GN=PCSK1 - [NEC1_HUMAN]	45.89	2	1	23	43	706	78.9608	6.20166
	1160	P45974-2	Isoform Short of Ubiquitin carboxyl-terminal hydrolase 5 OS=Homo sapiens GN=USP5 - [UBP5_HUMAN]	45.87	2	5	25	88	835	93.2484	5.08447
	1161	P17655	Calpain-2 catalytic subunit OS=Homo sapiens GN=CAPN2 PE=1 SV=6 - [CAN2_HUMAN]	45.86	2	11	28	121	700	79.9448	4.98291
	1162	O95239	Chromosome-associated kinesin KIF4A OS=Homo sapiens GN=KIF4A PE=1 SV=3 - [KIF4A_HUMAN]	45.86	2	1	48	119	1232	139.794	6.26514
	1163	Q15233	Non-POU domain-containing octamer-binding protein OS=Homo sapiens GN=NONO PE=1 SV=4 - [NONO_HUMAN]	45.86	2	1	16	116	471	54.1973	8.95361
	1164	Q2M1Z3	Rho GTPase-activating protein 31 OS=Homo sapiens GN=ARHGAP31 PE=1 SV=2 - [RHG31_HUMAN]	45.84	1	1	37	92	1444	156.888	5.75732
	1165	P69905	Hemoglobin subunit alpha OS=Homo sapiens GN=HBA1 PE=1 SV=2 - [HBA_HUMAN]	45.77	2	4	9	43	142	15.2479	8.67529
	1166	P17174	Aspartate aminotransferase, cytoplasmic OS=Homo sapiens GN=GOT1 PE=1 SV=3 - [AATC_HUMAN]	45.76	1	1	13	18	413	46.2185	7.00537
	1167	O75116	Rho-associated protein kinase 2 OS=Homo sapiens GN=ROCK2 PE=1 SV=4 - [ROCK2_HUMAN]	45.75	1	2	54	138	1388	160.799	6.02393
	1168	Q63HN8-4	Isoform 2 of E3 ubiquitin-protein ligase RNF213 OS=Homo sapiens GN=RNF213 - [RN213_HUMAN]	45.74	3	1	172	343	5256	596.106	6.43018
	1169	Q7RTY5	Serine protease 48 OS=Homo sapiens GN=PRSS48 PE=2 SV=2 - [PRS48_HUMAN]	45.73	1	1	6	12	328	35.9473	7.53271
	1170	Q9NWL6	Asparagine synthetase domain-containing protein 1 OS=Homo sapiens GN=ASNSD1 PE=2 SV=2 - [ASND1_HUMAN]	45.72	1	1	24	48	643	72.0342	6.82959
	1171	Q15139	Serine/threonine-protein kinase D1 OS=Homo sapiens GN=PRKD1 PE=1 SV=2 - [KPCD1_HUMAN]	45.72	1	1	27	52	912	101.639	6.62451
	1172	Q96DT5	Dynein heavy chain 11, axonemal OS=Homo sapiens GN=DNAH11 PE=1 SV=3 - [DYH11_HUMAN]	45.7	1	2	150	326	4523	520.711	6.44287
	1173	P01266	Thyroglobulin OS=Homo sapiens GN=TG PE=1 SV=5 - [THYG_HUMAN]	45.7	2	2	73	159	2768	304.594	5.57959
	1174	Q15382	GTP-binding protein Rheb OS=Homo sapiens GN=RHEB PE=1 SV=1 - [RHEB_HUMAN]	45.65	1	3	8	36	184	20.4845	5.92236
	1175	P78417	Glutathione S-transferase omega-1 OS=Homo sapiens GN=GSTO1 PE=1 SV=2 - [GSTO1_HUMAN]	45.64	3	6	11	74	241	27.548	6.59521
	1176	Q13190	Syntaxin-5 OS=Homo sapiens GN=STX5 PE=1 SV=2 - [STX5_HUMAN]	45.63	1	1	9	20	355	39.6478	9.15869
	1177	P00533	Epidermal growth factor receptor OS=Homo sapiens GN=EGFR PE=1 SV=2 - [EGFR_HUMAN]	45.62	4	16	40	159	1210	134.19	6.68311
	1178	Q9P2D1	Chromodomain-helicase-DNA-binding protein 7 OS=Homo sapiens GN=CHD7 PE=1 SV=3 - [CHD7_HUMAN]	45.61	2	1	103	238	2997	335.717	6.34131
	1179	Q8TEX9-2	Isoform 2 of Importin-4 OS=Homo sapiens GN=IPO4 - [IPO4_HUMAN]	45.61	2	2	31	69	1083	118.826	4.94482
	1180	P42356	Phosphatidylinositol 4-kinase alpha OS=Homo sapiens GN=PI4KA PE=1 SV=3 - [PI4KA_HUMAN]	45.6	4	2	74	183	2044	231.17	6.87354
	1181	P10721	Mast/stem cell growth factor receptor Kit OS=Homo sapiens GN=KIT PE=1 SV=1 - [KIT_HUMAN]	45.59	14	1	27	59	976	109.794	6.97607
	1182	P49643	DNA primase large subunit OS=Homo sapiens GN=PRIM2 PE=1 SV=2 - [PRI2_HUMAN]	45.58	2	1	16	37	509	58.769	7.91357
	1183	Q02962	Paired box protein Pax-2 OS=Homo sapiens GN=PAX2 PE=1 SV=4 - [PAX2_HUMAN]	45.56	4	1	13	32	417	44.6783	7.6499
	1184	Q8N5J4	Transcription factor Spi-C OS=Homo sapiens GN=SPIC PE=2 SV=1 - [SPIC_HUMAN]	45.56	1	1	6	10	248	29.1615	8.89502
	1185	O60422	One cut domain family member 3 OS=Homo sapiens GN=ONECUT3 PE=2 SV=2 - [ONEC3_HUMAN]	45.55	1	1	11	27	494	50.0058	9.87646
	1186	P12110	Collagen alpha-2(VI) chain OS=Homo sapiens GN=COL6A2 PE=1 SV=4 - [CO6A2_HUMAN]	45.53	3	26	44	392	1019	108.512	6.21436
	1187	O14745	Na(+)/H(+) exchange regulatory cofactor NHE-RF1 OS=Homo sapiens GN=SLC9A3R1 PE=1 SV=4 - [NHRF1_HUMAN]	45.53	1	2	14	47	358	38.8446	5.77002
	1188	Q69YN4	Protein virilizer homolog OS=Homo sapiens GN=KIAA1429 PE=1 SV=2 - [VIR_HUMAN]	45.53	3	1	60	135	1812	201.898	5.0083
	1189	P10909-2	Isoform 2 of Clusterin OS=Homo sapiens GN=CLU - [CLUS_HUMAN]	45.51	5	8	19	69	501	57.7956	6.68311
	1190	Q96PE2	Rho guanine nucleotide exchange factor 17 OS=Homo sapiens GN=ARHGEF17 PE=1 SV=1 - [ARHGH_HUMAN]	45.47	1	2	67	132	2063	221.535	6.29053
	1191	O00311	Cell division cycle 7-related protein kinase OS=Homo sapiens GN=CDC7 PE=1 SV=1 - [CDC7_HUMAN]	45.47	1	1	18	36	574	63.8477	8.73389
	1192	Q68D10-2	Isoform 2 of Protein SPT2 homolog OS=Homo sapiens GN=SPTY2D1 - [SPT2_HUMAN]	45.47	3	1	24	62	673	74.1848	9.77393
	1193	O14974	Protein phosphatase 1 regulatory subunit 12A OS=Homo sapiens GN=PPP1R12A PE=1 SV=1 - [MYPT1_HUMAN]	45.44	5	1	32	101	1030	115.211	5.40186
	1194	O43837-2	Isoform A of Isocitrate dehydrogenase [NAD] subunit beta, mitochondrial OS=Homo sapiens GN=IDH3B - [IDH3B_HUMAN]	45.43	2	1	13	54	383	41.8603	7.59131
	1195	Q8TF17	SH3 domain and tetratricopeptide repeat-containing protein 2 OS=Homo sapiens GN=SH3TC2 PE=1 SV=2 - [S3TC2_HUMAN]	45.42	2	1	37	74	1288	144.685	6.3667
	1196	Q8IY22	C-Maf-inducing protein OS=Homo sapiens GN=CMIP PE=1 SV=3 - [CMIP_HUMAN]	45.41	3	1	23	79	773	86.2751	6.69775
	1197	Q8NDZ2	SUMO-interacting motif-containing protein 1 OS=Homo sapiens GN=SIMC1 PE=1 SV=3 - [SIMC1_HUMAN]	45.41	2	1	28	56	872	96.777	6.56592
	1198	Q6NZI2	Polymerase I and transcript release factor OS=Homo sapiens GN=PTRF PE=1 SV=1 - [PTRF_HUMAN]	45.38	2	2	15	32	390	43.4498	5.60498
	1199	P62244	40S ribosomal protein S15a OS=Homo sapiens GN=RPS15A PE=1 SV=2 - [RS15A_HUMAN]	45.38	1	3	6	24	130	14.83	10.1255
	1200	Q5MNZ9-2	Isoform 2 of WD repeat domain phosphoinositide-interacting protein 1 OS=Homo sapiens GN=WIPI1 - [WIPI1_HUMAN]	45.35	2	1	14	28	441	48.171	6.88818
	1201	P21399	Cytoplasmic aconitate hydratase OS=Homo sapiens GN=ACO1 PE=1 SV=3 - [ACOC_HUMAN]	45.33	1	3	29	63	889	98.3366	6.68311
	1202	P49591	Serine--tRNA ligase, cytoplasmic OS=Homo sapiens GN=SARS PE=1 SV=3 - [SYSC_HUMAN]	45.33	1	2	15	42	514	58.7401	6.43018
	1203	Q9Y210-3	Isoform 3 of Short transient receptor potential channel 6 OS=Homo sapiens GN=TRPC6 - [TRPC6_HUMAN]	45.32	3	1	27	88	876	100.042	6.48096
	1204	Q04446	1,4-alpha-glucan-branching enzyme OS=Homo sapiens GN=GBE1 PE=1 SV=3 - [GLGB_HUMAN]	45.3	1	2	19	37	702	80.4226	6.31592
	1205	Q8N4C6-7	Isoform 7 of Ninein OS=Homo sapiens GN=NIN - [NIN_HUMAN]	45.29	7	1	82	187	2133	248.04	5.03369
	1206	Q8WXH0	Nesprin-2 OS=Homo sapiens GN=SYNE2 PE=1 SV=3 - [SYNE2_HUMAN]	45.29	5	2	229	550	6885	795.944	5.36377
	1207	P47871	Glucagon receptor OS=Homo sapiens GN=GCGR PE=1 SV=1 - [GLR_HUMAN]	45.28	1	1	12	45	477	53.9738	8.71924
	1208	Q16821	Protein phosphatase 1 regulatory subunit 3A OS=Homo sapiens GN=PPP1R3A PE=1 SV=3 - [PPR3A_HUMAN]	45.28	1	1	32	80	1122	125.689	4.99561
	1209	P61019	Ras-related protein Rab-2A OS=Homo sapiens GN=RAB2A PE=1 SV=1 - [RAB2A_HUMAN]	45.28	3	3	5	19	212	23.5308	6.53662
	1210	P41252	Isoleucine--tRNA ligase, cytoplasmic OS=Homo sapiens GN=IARS PE=1 SV=2 - [SYIC_HUMAN]	45.25	1	6	38	80	1262	144.406	6.15088
	1211	O00421-2	Isoform 2 of C-C chemokine receptor-like 2 OS=Homo sapiens GN=CCRL2 - [CCRL2_HUMAN]	45.22	1	1	7	16	356	40.9252	8.19189
	1212	Q14847	LIM and SH3 domain protein 1 OS=Homo sapiens GN=LASP1 PE=1 SV=2 - [LASP1_HUMAN]	45.21	2	1	11	62	261	29.6982	7.04932
	1213	Q9UPN3	Microtubule-actin cross-linking factor 1, isoforms 1/2/3/5 OS=Homo sapiens GN=MACF1 PE=1 SV=4 - [MACF1_HUMAN]	45.21	5	1	261	536	7388	837.787	5.38916
	1214	Q14676	Mediator of DNA damage checkpoint protein 1 OS=Homo sapiens GN=MDC1 PE=1 SV=3 - [MDC1_HUMAN]	45.19	3	1	56	124	2089	226.529	5.46533
	1215	P29966	Myristoylated alanine-rich C-kinase substrate OS=Homo sapiens GN=MARCKS PE=1 SV=4 - [MARCS_HUMAN]	45.18	1	9	12	118	332	31.5359	4.44971
	1216	Q9NUT2	ATP-binding cassette sub-family B member 8, mitochondrial OS=Homo sapiens GN=ABCB8 PE=1 SV=3 - [ABCB8_HUMAN]	45.17	2	1	24	34	735	79.9379	8.98291
	1217	Q9P203	BTB/POZ domain-containing protein 7 OS=Homo sapiens GN=BTBD7 PE=1 SV=3 - [BTBD7_HUMAN]	45.14	2	1	37	91	1132	126.288	6.97607
	1218	Q9UDY4	DnaJ homolog subfamily B member 4 OS=Homo sapiens GN=DNAJB4 PE=1 SV=1 - [DNJB4_HUMAN]	45.1	1	1	13	38	337	37.7831	8.49951
	1219	Q5U5R9	Probable E3 ubiquitin-protein ligase HECTD2 OS=Homo sapiens GN=HECTD2 PE=2 SV=2 - [HECD2_HUMAN]	45.1	1	1	24	70	776	88.0664	8.19189
	1220	Q96P70	Importin-9 OS=Homo sapiens GN=IPO9 PE=1 SV=3 - [IPO9_HUMAN]	45.05	1	1	27	72	1041	115.889	4.80518
	1221	O15460-2	Isoform IIa of Prolyl 4-hydroxylase subunit alpha-2 OS=Homo sapiens GN=P4HA2 - [P4HA2_HUMAN]	45.03	2	1	16	23	533	60.5946	5.70654
	1222	P35080-2	Isoform IIb of Profilin-2 OS=Homo sapiens GN=PFN2 - [PROF2_HUMAN]	45	2	1	5	17	140	15.0784	6.1001
	1223	Q9HAZ2-3	Isoform 3 of PR domain zinc finger protein 16 OS=Homo sapiens GN=PRDM16 - [PRD16_HUMAN]	44.98	4	1	34	78	1276	140.174	6.21436
	1224	Q9H0J4	Glutamine-rich protein 2 OS=Homo sapiens GN=QRICH2 PE=1 SV=1 - [QRIC2_HUMAN]	44.98	3	1	51	142	1663	180.715	6.72705
	1225	Q8TD26	Chromodomain-helicase-DNA-binding protein 6 OS=Homo sapiens GN=CHD6 PE=1 SV=4 - [CHD6_HUMAN]	44.97	1	1	87	189	2715	305.22	6.26514
	1226	Q8TE73	Dynein heavy chain 5, axonemal OS=Homo sapiens GN=DNAH5 PE=1 SV=3 - [DYH5_HUMAN]	44.96	1	1	134	294	4624	528.684	6.1001
	1227	Q8WZ42-12	Isoform 12 of Titin OS=Homo sapiens GN=TTN - [TITIN_HUMAN]	44.95	12	3	1122	2446	35991	3992.14	6.39209
	1228	E7EW31	Proline-rich basic protein 1 OS=Homo sapiens GN=PROB1 PE=2 SV=2 - [PROB1_HUMAN]	44.93	1	1	28	68	1015	106.852	9.62744
	1229	Q4KMP7	TBC1 domain family member 10B OS=Homo sapiens GN=TBC1D10B PE=1 SV=3 - [TB10B_HUMAN]	44.93	1	1	27	70	808	87.1447	9.18799
	1230	P60033	CD81 antigen OS=Homo sapiens GN=CD81 PE=1 SV=1 - [CD81_HUMAN]	44.92	1	3	6	117	236	25.7921	5.2876
	1231	Q9P270	SLAIN motif-containing protein 2 OS=Homo sapiens GN=SLAIN2 PE=1 SV=2 - [SLAI2_HUMAN]	44.92	1	1	17	36	581	62.5053	9.45166
	1232	P33981	Dual specificity protein kinase TTK OS=Homo sapiens GN=TTK PE=1 SV=2 - [TTK_HUMAN]	44.92	2	1	28	67	857	97.0111	8.1626
	1233	P62837	Ubiquitin-conjugating enzyme E2 D2 OS=Homo sapiens GN=UBE2D2 PE=1 SV=1 - [UB2D2_HUMAN]	44.9	7	2	5	13	147	16.7244	7.82568
	1234	Q00975	Voltage-dependent N-type calcium channel subunit alpha-1B OS=Homo sapiens GN=CACNA1B PE=1 SV=1 - [CAC1B_HUMAN]	44.89	2	1	85	210	2339	262.329	8.51416
	1235	Q6P3W7	SCY1-like protein 2 OS=Homo sapiens GN=SCYL2 PE=1 SV=1 - [SCYL2_HUMAN]	44.89	1	1	25	88	929	103.642	8.22119
	1236	Q9NUM4	Transmembrane protein 106B OS=Homo sapiens GN=TMEM106B PE=1 SV=2 - [T106B_HUMAN]	44.89	1	1	9	17	274	31.1076	6.99072
	1237	Q9NT68	Teneurin-2 OS=Homo sapiens GN=TENM2 PE=1 SV=3 - [TEN2_HUMAN]	44.88	2	1	80	198	2774	307.592	6.68311
	1238	Q0VDD8-4	Isoform 4 of Dynein heavy chain 14, axonemal OS=Homo sapiens GN=DNAH14 - [DYH14_HUMAN]	44.87	2	1	142	301	4515	518.235	7.06396
	1239	Q6ZNL6	FYVE, RhoGEF and PH domain-containing protein 5 OS=Homo sapiens GN=FGD5 PE=1 SV=3 - [FGD5_HUMAN]	44.87	2	1	45	80	1462	159.791	5.0083
	1240	Q9Y5P8	Serine/threonine-protein phosphatase 2A regulatory subunit B'' subunit beta OS=Homo sapiens GN=PPP2R3B PE=1 SV=2 - [P2R3B_HUMAN]	44.87	1	1	17	41	575	65.0193	5.13525
	1241	O15173	Membrane-associated progesterone receptor component 2 OS=Homo sapiens GN=PGRMC2 PE=1 SV=1 - [PGRC2_HUMAN]	44.84	1	2	9	25	223	23.8037	4.88135
	1242	Q03001	Dystonin OS=Homo sapiens GN=DST PE=1 SV=4 - [DYST_HUMAN]	44.83	1	1	239	558	7570	860.127	5.24951
	1243	Q8NI60	Chaperone activity of bc1 complex-like, mitochondrial OS=Homo sapiens GN=ADCK3 PE=1 SV=1 - [ADCK3_HUMAN]	44.82	1	1	19	49	647	71.9044	6.99072
	1244	Q6U841	Sodium-driven chloride bicarbonate exchanger OS=Homo sapiens GN=SLC4A10 PE=2 SV=1 - [S4A10_HUMAN]	44.81	3	1	33	74	1118	125.866	6.49365
	1245	A2RRH5-4	Isoform 4 of WD repeat-containing protein 27 OS=Homo sapiens GN=WDR27 - [WDR27_HUMAN]	44.8	3	1	24	51	895	98.0331	8.06006
	1246	O14917	Protocadherin-17 OS=Homo sapiens GN=PCDH17 PE=2 SV=2 - [PCD17_HUMAN]	44.78	2	1	35	123	1159	126.151	5.18604
	1247	Q9Y6M5	Zinc transporter 1 OS=Homo sapiens GN=SLC30A1 PE=1 SV=3 - [ZNT1_HUMAN]	44.77	1	2	18	72	507	55.2641	6.48096
	1248	O43865	Putative adenosylhomocysteinase 2 OS=Homo sapiens GN=AHCYL1 PE=1 SV=2 - [SAHH2_HUMAN]	44.72	6	3	20	60	530	58.9134	6.88818
	1249	O75843	AP-1 complex subunit gamma-like 2 OS=Homo sapiens GN=AP1G2 PE=1 SV=1 - [AP1G2_HUMAN]	44.71	1	1	31	68	785	87.0617	6.55127
	1250	P15311	Ezrin OS=Homo sapiens GN=EZR PE=1 SV=4 - [EZRI_HUMAN]	44.71	4	2	28	140	586	69.3697	6.26514
	1251	O95180-2	Isoform 2 of Voltage-dependent T-type calcium channel subunit alpha-1H OS=Homo sapiens GN=CACNA1H - [CAC1H_HUMAN]	44.7	2	1	67	143	2347	258.38	7.45947
	1252	Q13596-3	Isoform 3 of Sorting nexin-1 OS=Homo sapiens GN=SNX1 - [SNX1_HUMAN]	44.7	3	1	19	41	557	63.0432	5.47803
	1253	Q9NY57-2	Isoform 2 of Serine/threonine-protein kinase 32B OS=Homo sapiens GN=STK32B - [ST32B_HUMAN]	44.69	2	1	10	23	367	42.5333	7.35693
	1254	Q04726-4	Isoform 4 of Transducin-like enhancer protein 3 OS=Homo sapiens GN=TLE3 - [TLE3_HUMAN]	44.69	9	1	18	56	772	83.2952	7.1665
	1255	P35749-2	Isoform 2 of Myosin-11 OS=Homo sapiens GN=MYH11 - [MYH11_HUMAN]	44.67	9	1	83	292	1979	227.949	5.50342
	1256	Q6P5Z2	Serine/threonine-protein kinase N3 OS=Homo sapiens GN=PKN3 PE=1 SV=1 - [PKN3_HUMAN]	44.66	1	1	29	81	889	99.358	8.45557
	1257	Q6PJT7-9	Isoform 9 of Zinc finger CCCH domain-containing protein 14 OS=Homo sapiens GN=ZC3H14 - [ZC3HE_HUMAN]	44.66	6	1	22	74	730	82.2601	7.31299
	1258	P50914	60S ribosomal protein L14 OS=Homo sapiens GN=RPL14 PE=1 SV=4 - [RL14_HUMAN]	44.65	1	3	9	46	215	23.417	10.9312
	1259	O43396	Thioredoxin-like protein 1 OS=Homo sapiens GN=TXNL1 PE=1 SV=3 - [TXNL1_HUMAN]	44.64	1	1	11	37	289	32.2307	4.95752
	1260	Q9UHB7	AF4/FMR2 family member 4 OS=Homo sapiens GN=AFF4 PE=1 SV=1 - [AFF4_HUMAN]	44.63	3	1	37	65	1163	127.382	9.30518
	1261	O60294	Leucine carboxyl methyltransferase 2 OS=Homo sapiens GN=LCMT2 PE=1 SV=3 - [LCMT2_HUMAN]	44.61	1	1	23	37	686	75.5542	6.72705
	1262	P04179	Superoxide dismutase [Mn], mitochondrial OS=Homo sapiens GN=SOD2 PE=1 SV=2 - [SODM_HUMAN]	44.59	2	1	7	13	222	24.7066	8.25049
	1263	P13807-2	Isoform 2 of Glycogen [starch] synthase, muscle OS=Homo sapiens GN=GYS1 - [GYS1_HUMAN]	44.58	2	1	18	35	673	76.4348	6.53662
	1264	Q9Y653-2	Isoform 2 of G-protein coupled receptor 56 OS=Homo sapiens GN=GPR56 - [GPR56_HUMAN]	44.54	4	4	17	34	687	77.0228	8.44092
	1265	P21980	Protein-glutamine gamma-glutamyltransferase 2 OS=Homo sapiens GN=TGM2 PE=1 SV=2 - [TGM2_HUMAN]	44.54	3	11	26	128	687	77.2797	5.22412
	1266	Q969H8	UPF0556 protein C19orf10 OS=Homo sapiens GN=C19orf10 PE=1 SV=1 - [CS010_HUMAN]	44.51	1	1	6	19	173	18.7833	6.68311
	1267	P02768	Serum albumin OS=Homo sapiens GN=ALB PE=1 SV=2 - [ALBU_HUMAN]	44.5	2	5	20	205	609	69.3215	6.27783
	1268	P49023	Paxillin OS=Homo sapiens GN=PXN PE=1 SV=3 - [PAXI_HUMAN]	44.5	3	1	14	36	591	64.4639	6.18896
	1269	O15528	25-hydroxyvitamin D-1 alpha hydroxylase, mitochondrial OS=Homo sapiens GN=CYP27B1 PE=1 SV=1 - [CP27B_HUMAN]	44.49	1	1	14	22	508	56.4685	9.15869
	1270	P23467-3	Isoform 3 of Receptor-type tyrosine-protein phosphatase beta OS=Homo sapiens GN=PTPRB - [PTPRB_HUMAN]	44.47	2	1	57	157	2215	248.988	7.73779
	1271	Q4KMQ2-2	Isoform 2 of Anoctamin-6 OS=Homo sapiens GN=ANO6 - [ANO6_HUMAN]	44.36	4	3	29	54	931	108.362	7.86963
	1272	P10644	cAMP-dependent protein kinase type I-alpha regulatory subunit OS=Homo sapiens GN=PRKAR1A PE=1 SV=1 - [KAP0_HUMAN]	44.36	1	2	16	23	381	42.955	5.35107
	1273	Q86T29-2	Isoform 2 of Zinc finger protein 605 OS=Homo sapiens GN=ZNF605 - [ZN605_HUMAN]	44.35	2	1	20	30	672	77.9567	9.05615
	1274	Q9Y2P7	Zinc finger protein 256 OS=Homo sapiens GN=ZNF256 PE=1 SV=2 - [ZN256_HUMAN]	44.34	1	1	21	58	627	71.8246	8.80713
	1275	Q9NYQ8	Protocadherin Fat 2 OS=Homo sapiens GN=FAT2 PE=1 SV=2 - [FAT2_HUMAN]	44.31	1	1	111	233	4349	479.018	5.16064
	1276	Q8NB66	Protein unc-13 homolog C OS=Homo sapiens GN=UNC13C PE=2 SV=3 - [UN13C_HUMAN]	44.31	1	1	70	141	2214	250.754	5.92236
	1277	Q96AG4	Leucine-rich repeat-containing protein 59 OS=Homo sapiens GN=LRRC59 PE=1 SV=1 - [LRC59_HUMAN]	44.3	1	2	11	20	307	34.9089	9.56885
	1278	P20908	Collagen alpha-1(V) chain OS=Homo sapiens GN=COL5A1 PE=1 SV=3 - [CO5A1_HUMAN]	44.29	1	1	51	133	1838	183.447	5.05908
	1279	Q07866-9	Isoform I of Kinesin light chain 1 OS=Homo sapiens GN=KLC1 - [KLC1_HUMAN]	44.29	12	1	20	42	639	72.3527	7.48877
	1280	Q9H2G2	STE20-like serine/threonine-protein kinase OS=Homo sapiens GN=SLK PE=1 SV=1 - [SLK_HUMAN]	44.29	2	1	39	79	1235	142.607	5.14795
	1281	Q86TU7	Histone-lysine N-methyltransferase setd3 OS=Homo sapiens GN=SETD3 PE=1 SV=1 - [SETD3_HUMAN]	44.28	1	1	16	33	594	67.2152	5.96045
	1282	Q5SRE5-2	Isoform 2 of Nucleoporin NUP188 homolog OS=Homo sapiens GN=NUP188 - [NU188_HUMAN]	44.26	2	1	47	96	1638	182.176	6.82959
	1283	Q9NYC9	Dynein heavy chain 9, axonemal OS=Homo sapiens GN=DNAH9 PE=1 SV=3 - [DYH9_HUMAN]	44.25	2	1	146	345	4486	511.551	5.90967
	1284	Q8N2B8	Putative uncharacterized protein FLJ33534 OS=Homo sapiens PE=2 SV=1 - [YB035_HUMAN]	44.25	2	1	4	14	174	19.067	11.5757
	1285	P52292	Importin subunit alpha-1 OS=Homo sapiens GN=KPNA2 PE=1 SV=1 - [IMA1_HUMAN]	44.23	2	2	15	25	529	57.8259	5.40186
	1286	Q9Y2Q0	Probable phospholipid-transporting ATPase IA OS=Homo sapiens GN=ATP8A1 PE=1 SV=1 - [AT8A1_HUMAN]	44.16	3	1	31	68	1164	131.285	6.84424
	1287	Q96GX5	Serine/threonine-protein kinase greatwall OS=Homo sapiens GN=MASTL PE=1 SV=1 - [GWL_HUMAN]	44.14	3	1	26	91	879	97.2572	5.98584
	1288	P56199	Integrin alpha-1 OS=Homo sapiens GN=ITGA1 PE=1 SV=2 - [ITA1_HUMAN]	44.11	1	2	29	85	1179	130.765	6.29053
	1289	O14777	Kinetochore protein NDC80 homolog OS=Homo sapiens GN=NDC80 PE=1 SV=1 - [NDC80_HUMAN]	44.08	1	1	21	58	642	73.8665	5.60498
	1290	Q9NZN8	CCR4-NOT transcription complex subunit 2 OS=Homo sapiens GN=CNOT2 PE=1 SV=1 - [CNOT2_HUMAN]	44.07	3	1	17	80	540	59.6999	7.66455
	1291	Q9H8H2	Probable ATP-dependent RNA helicase DDX31 OS=Homo sapiens GN=DDX31 PE=1 SV=2 - [DDX31_HUMAN]	44.07	3	1	26	64	851	94.0286	9.99365
	1292	Q6ZMU5	Tripartite motif-containing protein 72 OS=Homo sapiens GN=TRIM72 PE=1 SV=2 - [TRI72_HUMAN]	44.03	1	1	16	33	477	52.697	6.48096
	1293	O95071	E3 ubiquitin-protein ligase UBR5 OS=Homo sapiens GN=UBR5 PE=1 SV=2 - [UBR5_HUMAN]	44.02	1	1	81	237	2799	309.158	5.84619
	1294	P23368	NAD-dependent malic enzyme, mitochondrial OS=Homo sapiens GN=ME2 PE=1 SV=1 - [MAOM_HUMAN]	44.01	2	1	13	50	584	65.4018	7.60596
	1295	P48556	26S proteasome non-ATPase regulatory subunit 8 OS=Homo sapiens GN=PSMD8 PE=1 SV=2 - [PSMD8_HUMAN]	44	1	1	10	27	350	39.5868	9.70068
	1296	Q14692	Ribosome biogenesis protein BMS1 homolog OS=Homo sapiens GN=BMS1 PE=1 SV=1 - [BMS1_HUMAN]	43.99	1	1	33	66	1282	145.716	6.44287
	1297	H3BV60	Transforming growth factor-beta receptor type 3-like protein OS=Homo sapiens GN=TGFBR3L PE=2 SV=1 - [TGR3L_HUMAN]	43.99	1	1	8	42	316	32.7985	11.7222
	1298	Q5SQI0-3	Isoform 3 of Alpha-tubulin N-acetyltransferase OS=Homo sapiens GN=ATAT1 - [ATAT_HUMAN]	43.97	3	1	9	18	398	44.431	9.75928
	1299	Q9Y485	DmX-like protein 1 OS=Homo sapiens GN=DMXL1 PE=1 SV=3 - [DMXL1_HUMAN]	43.97	1	1	80	184	3027	337.625	6.34131
	1300	Q9UNH5-5	Isoform 5 of Dual specificity protein phosphatase CDC14A OS=Homo sapiens GN=CDC14A - [CC14A_HUMAN]	43.93	4	1	17	37	610	68.1604	9.17334
	1301	Q8WW22-2	Isoform 2 of DnaJ homolog subfamily A member 4 OS=Homo sapiens GN=DNAJA4 - [DNJA4_HUMAN]	43.9	3	1	13	33	426	47.9325	7.76709
	1302	P04626	Receptor tyrosine-protein kinase erbB-2 OS=Homo sapiens GN=ERBB2 PE=1 SV=1 - [ERBB2_HUMAN]	43.9	4	1	35	115	1255	137.821	5.90967
	1303	P18621-3	Isoform 3 of 60S ribosomal protein L17 OS=Homo sapiens GN=RPL17 - [RL17_HUMAN]	43.86	3	3	7	24	228	26.3557	10.0962
	1304	Q9P265	Disco-interacting protein 2 homolog B OS=Homo sapiens GN=DIP2B PE=1 SV=3 - [DIP2B_HUMAN]	43.85	1	1	44	93	1576	171.382	8.08936
	1305	Q9H0H0	Integrator complex subunit 2 OS=Homo sapiens GN=INTS2 PE=1 SV=2 - [INT2_HUMAN]	43.85	1	1	35	88	1204	134.237	6.04932
	1306	P12931	Proto-oncogene tyrosine-protein kinase Src OS=Homo sapiens GN=SRC PE=1 SV=3 - [SRC_HUMAN]	43.84	8	2	19	38	536	59.797	7.41553
	1307	Q5T0W9	Protein FAM83B OS=Homo sapiens GN=FAM83B PE=1 SV=1 - [FA83B_HUMAN]	43.82	1	1	30	75	1011	114.729	8.96826
	1308	P04114	Apolipoprotein B-100 OS=Homo sapiens GN=APOB PE=1 SV=2 - [APOB_HUMAN]	43.81	1	1	138	290	4563	515.283	7.04932
	1309	P27701-2	Isoform 2 of CD82 antigen OS=Homo sapiens GN=CD82 - [CD82_HUMAN]	43.8	2	2	7	35	242	26.8003	5.10986
	1310	O43424	Glutamate receptor ionotropic, delta-2 OS=Homo sapiens GN=GRID2 PE=2 SV=2 - [GRID2_HUMAN]	43.79	1	2	28	94	1007	113.284	6.07471
	1311	P11836	B-lymphocyte antigen CD20 OS=Homo sapiens GN=MS4A1 PE=1 SV=1 - [CD20_HUMAN]	43.77	1	1	14	27	297	33.0557	5.04639
	1312	Q9BT22	Chitobiosyldiphosphodolichol beta-mannosyltransferase OS=Homo sapiens GN=ALG1 PE=1 SV=2 - [ALG1_HUMAN]	43.75	1	1	15	48	464	52.4839	7.2251
	1313	Q9BQ04	RNA-binding protein 4B OS=Homo sapiens GN=RBM4B PE=1 SV=1 - [RBM4B_HUMAN]	43.73	5	1	14	54	359	40.1244	6.7417
	1314	Q9Y678	Coatomer subunit gamma-1 OS=Homo sapiens GN=COPG1 PE=1 SV=1 - [COPG1_HUMAN]	43.71	2	1	28	81	874	97.6555	5.46533
	1315	Q9HCK1	DBF4-type zinc finger-containing protein 2 OS=Homo sapiens GN=ZDBF2 PE=1 SV=3 - [ZDBF2_HUMAN]	43.71	1	1	67	184	2354	265.453	6.16357
	1316	Q8WUI4-8	Isoform 8 of Histone deacetylase 7 OS=Homo sapiens GN=HDAC7 - [HDAC7_HUMAN]	43.69	4	1	26	63	1014	108.869	8.51416
	1317	Q5JWF8	Actin-like protein 10 OS=Homo sapiens GN=ACTL10 PE=2 SV=1 - [ACL10_HUMAN]	43.67	1	1	8	37	245	26.7337	9.31982
	1318	Q13045	Protein flightless-1 homolog OS=Homo sapiens GN=FLII PE=1 SV=2 - [FLII_HUMAN]	43.66	3	1	34	75	1269	144.66	6.04932
	1319	O95297-2	Isoform 2 of Myelin protein zero-like protein 1 OS=Homo sapiens GN=MPZL1 - [MPZL1_HUMAN]	43.66	4	2	9	28	268	28.963	8.71924
	1320	O75976	Carboxypeptidase D OS=Homo sapiens GN=CPD PE=1 SV=2 - [CBPD_HUMAN]	43.62	2	1	42	83	1380	152.835	6.04932
	1321	Q9UBC5	Unconventional myosin-Ia OS=Homo sapiens GN=MYO1A PE=1 SV=1 - [MYO1A_HUMAN]	43.62	1	1	33	96	1043	118.326	9.30518
	1322	Q9HCD6	Protein TANC2 OS=Homo sapiens GN=TANC2 PE=1 SV=3 - [TANC2_HUMAN]	43.62	4	1	58	96	1990	219.512	8.07471
	1323	Q6ZSJ9	Protein shisa-6 homolog OS=Homo sapiens GN=SHISA6 PE=2 SV=2 - [SHSA6_HUMAN]	43.6	3	1	15	36	500	55.7291	9.34912
	1324	P11274	Breakpoint cluster region protein OS=Homo sapiens GN=BCR PE=1 SV=2 - [BCR_HUMAN]	43.59	2	1	38	116	1271	142.73	7.03467
	1325	Q9BSJ2	Gamma-tubulin complex component 2 OS=Homo sapiens GN=TUBGCP2 PE=1 SV=2 - [GCP2_HUMAN]	43.57	3	1	28	97	902	102.469	6.84424
	1326	P13535	Myosin-8 OS=Homo sapiens GN=MYH8 PE=1 SV=3 - [MYH8_HUMAN]	43.57	9	2	67	145	1937	222.625	5.74463
	1327	P46019	Phosphorylase b kinase regulatory subunit alpha, liver isoform OS=Homo sapiens GN=PHKA2 PE=1 SV=1 - [KPB2_HUMAN]	43.56	1	1	32	100	1235	138.32	6.44287
	1328	P51956-2	Isoform 2 of Serine/threonine-protein kinase Nek3 OS=Homo sapiens GN=NEK3 - [NEK3_HUMAN]	43.56	2	1	18	71	489	55.8882	7.02002
	1329	Q8N0W3	L-fucose kinase OS=Homo sapiens GN=FUK PE=2 SV=2 - [FUK_HUMAN]	43.54	2	1	27	65	1084	117.548	6.25244
	1330	A0AVI2	Fer-1-like protein 5 OS=Homo sapiens GN=FER1L5 PE=2 SV=2 - [FR1L5_HUMAN]	43.53	2	1	66	175	2093	241.808	7.95752
	1331	Q75QN2	Integrator complex subunit 8 OS=Homo sapiens GN=INTS8 PE=1 SV=1 - [INT8_HUMAN]	43.52	2	1	31	105	995	113.016	7.04932
	1332	O60701	UDP-glucose 6-dehydrogenase OS=Homo sapiens GN=UGDH PE=1 SV=1 - [UGDH_HUMAN]	43.52	3	2	18	46	494	54.9893	7.12256
	1333	Q8TBZ2	MYCBP-associated protein OS=Homo sapiens GN=MYCBPAP PE=1 SV=2 - [MYBPP_HUMAN]	43.51	1	1	31	69	947	108.085	7.48877
	1334	Q9H8E8	Cysteine-rich protein 2-binding protein OS=Homo sapiens GN=CSRP2BP PE=1 SV=3 - [CSR2B_HUMAN]	43.48	2	1	25	65	782	88.7877	6.56592
	1335	Q99733	Nucleosome assembly protein 1-like 4 OS=Homo sapiens GN=NAP1L4 PE=1 SV=1 - [NP1L4_HUMAN]	43.47	1	1	14	48	375	42.7969	4.69092
	1336	Q9Y6E2	Basic leucine zipper and W2 domain-containing protein 2 OS=Homo sapiens GN=BZW2 PE=1 SV=1 - [BZW2_HUMAN]	43.44	1	1	15	27	419	48.132	6.68311
	1337	Q9HCM9	E3 ubiquitin-protein ligase TRIM39 OS=Homo sapiens GN=TRIM39 PE=1 SV=2 - [TRI39_HUMAN]	43.44	2	1	14	46	518	59.6527	7.6792
	1338	Q96RW7	Hemicentin-1 OS=Homo sapiens GN=HMCN1 PE=1 SV=2 - [HMCN1_HUMAN]	43.43	2	1	147	330	5635	613.001	6.49365
	1339	Q9NY33	Dipeptidyl peptidase 3 OS=Homo sapiens GN=DPP3 PE=1 SV=2 - [DPP3_HUMAN]	43.42	2	1	17	28	737	82.5378	5.09717
	1340	O00139-4	Isoform 4 of Kinesin-like protein KIF2A OS=Homo sapiens GN=KIF2A - [KIF2A_HUMAN]	43.41	5	1	21	69	744	84.0366	6.3667
	1341	Q9C099	Leucine-rich repeat and coiled-coil domain-containing protein 1 OS=Homo sapiens GN=LRRCC1 PE=1 SV=2 - [LRCC1_HUMAN]	43.41	2	1	31	100	1032	119.522	5.88428
	1342	O60500-2	Isoform 2 of Nephrin OS=Homo sapiens GN=NPHS1 - [NPHN_HUMAN]	43.38	2	1	30	72	1201	130.465	5.51611
	1343	O76094	Signal recognition particle subunit SRP72 OS=Homo sapiens GN=SRP72 PE=1 SV=3 - [SRP72_HUMAN]	43.37	1	1	17	31	671	74.56	9.26123
	1344	Q14690	Protein RRP5 homolog OS=Homo sapiens GN=PDCD11 PE=1 SV=3 - [RRP5_HUMAN]	43.35	1	1	62	200	1871	208.57	8.86572
	1345	Q5TCZ1	SH3 and PX domain-containing protein 2A OS=Homo sapiens GN=SH3PXD2A PE=1 SV=1 - [SPD2A_HUMAN]	43.34	1	1	35	105	1133	125.213	8.89502
	1346	P49588	Alanine--tRNA ligase, cytoplasmic OS=Homo sapiens GN=AARS PE=1 SV=2 - [SYAC_HUMAN]	43.29	1	3	30	58	968	106.743	5.52881
	1347	Q9BQL6	Fermitin family homolog 1 OS=Homo sapiens GN=FERMT1 PE=1 SV=1 - [FERM1_HUMAN]	43.28	3	1	19	45	677	77.3874	6.27783
	1348	Q16576-2	Isoform 2 of Histone-binding protein RBBP7 OS=Homo sapiens GN=RBBP7 - [RBBP7_HUMAN]	43.28	6	1	10	18	469	52.2816	5.2749
	1349	P10589	COUP transcription factor 1 OS=Homo sapiens GN=NR2F1 PE=1 SV=1 - [COT1_HUMAN]	43.26	1	1	15	115	423	46.1258	8.25049
	1350	Q7Z392	Trafficking protein particle complex subunit 11 OS=Homo sapiens GN=TRAPPC11 PE=1 SV=2 - [TPC11_HUMAN]	43.25	3	1	32	64	1133	128.798	7.13721
	1351	P43007	Neutral amino acid transporter A OS=Homo sapiens GN=SLC1A4 PE=1 SV=1 - [SATT_HUMAN]	43.23	2	3	12	37	532	55.6876	6.25244
	1352	Q96LK8	Spermatogenesis-associated protein 32 OS=Homo sapiens GN=SPATA32 PE=1 SV=3 - [SPT32_HUMAN]	43.23	1	1	11	26	384	42.2989	4.76709
	1353	O43913	Origin recognition complex subunit 5 OS=Homo sapiens GN=ORC5 PE=1 SV=1 - [ORC5_HUMAN]	43.22	1	1	11	28	435	50.2512	7.73779
	1354	Q5JWF2-2	Isoform XLas-2 of Guanine nucleotide-binding protein G(s) subunit alpha isoforms XLas OS=Homo sapiens GN=GNAS - [GNAS1_HUMAN]	43.21	6	7	39	166	1023	109.558	5.07178
	1355	Q7Z406	Myosin-14 OS=Homo sapiens GN=MYH14 PE=1 SV=2 - [MYH14_HUMAN]	43.21	10	1	81	235	1995	227.732	5.60498
	1356	Q04844	Acetylcholine receptor subunit epsilon OS=Homo sapiens GN=CHRNE PE=1 SV=2 - [ACHE_HUMAN]	43.2	1	1	14	39	493	54.6624	5.26221
	1357	Q96RP8	Potassium voltage-gated channel subfamily A member 7 OS=Homo sapiens GN=KCNA7 PE=2 SV=1 - [KCNA7_HUMAN]	43.2	1	1	12	26	456	50.5263	7.34229
	1358	P11172	Uridine 5'-monophosphate synthase OS=Homo sapiens GN=UMPS PE=1 SV=1 - [UMPS_HUMAN]	43.13	4	1	16	25	480	52.1886	7.23975
	1359	Q5TH69	Brefeldin A-inhibited guanine nucleotide-exchange protein 3 OS=Homo sapiens GN=ARFGEF3 PE=1 SV=3 - [BIG3_HUMAN]	43.09	1	1	61	130	2177	240.498	5.8208
	1360	Q5TCX8	Mitogen-activated protein kinase kinase kinase MLK4 OS=Homo sapiens GN=MLK4 PE=1 SV=1 - [M3KL4_HUMAN]	43.05	2	1	30	62	1036	113.885	8.73389
	1361	Q86V15	Zinc finger protein castor homolog 1 OS=Homo sapiens GN=CASZ1 PE=1 SV=4 - [CASZ1_HUMAN]	43.04	2	1	50	101	1759	189.948	7.03467
	1362	Q92886	Neurogenin-1 OS=Homo sapiens GN=NEUROG1 PE=1 SV=2 - [NGN1_HUMAN]	43.04	1	1	7	22	237	25.7018	7.31299
	1363	Q8N729	Neuropeptide W OS=Homo sapiens GN=NPW PE=1 SV=2 - [NPW_HUMAN]	43.03	1	1	7	27	165	18.0368	11.6196
	1364	Q99426	Tubulin-folding cofactor B OS=Homo sapiens GN=TBCB PE=1 SV=2 - [TBCB_HUMAN]	43.03	1	1	6	16	244	27.3085	5.14795
	1365	Q6ZUB1	Spermatogenesis-associated protein 31E1 OS=Homo sapiens GN=SPATA31E1 PE=2 SV=2 - [S31E1_HUMAN]	42.98	1	1	44	128	1445	157.037	9.1001
	1366	P55060-3	Isoform 3 of Exportin-2 OS=Homo sapiens GN=CSE1L - [XPO2_HUMAN]	42.96	3	2	26	54	945	107.709	5.8208
	1367	Q2TAZ0	Autophagy-related protein 2 homolog A OS=Homo sapiens GN=ATG2A PE=1 SV=3 - [ATG2A_HUMAN]	42.93	2	2	52	123	1938	212.726	5.88428
	1368	Q9NR31	GTP-binding protein SAR1a OS=Homo sapiens GN=SAR1A PE=1 SV=1 - [SAR1A_HUMAN]	42.93	2	2	9	30	198	22.3525	6.68311
	1369	P0DKB5	Trophoblast glycoprotein-like OS=Homo sapiens GN=TPBGL PE=4 SV=1 - [TPBGL_HUMAN]	42.93	1	1	13	33	382	40.3744	8.26514
	1370	Q9ULB1-3	Isoform 3a of Neurexin-1 OS=Homo sapiens GN=NRXN1 - [NRX1A_HUMAN]	42.92	4	1	41	140	1547	169.805	6.12549
	1371	Q9P1Q0-4	Isoform 4 of Vacuolar protein sorting-associated protein 54 OS=Homo sapiens GN=VPS54 - [VPS54_HUMAN]	42.9	3	1	24	48	965	109.292	6.58057
	1372	P56524	Histone deacetylase 4 OS=Homo sapiens GN=HDAC4 PE=1 SV=3 - [HDAC4_HUMAN]	42.9	1	1	27	39	1084	118.966	6.96143
	1373	Q8NFP9	Neurobeachin OS=Homo sapiens GN=NBEA PE=1 SV=3 - [NBEA_HUMAN]	42.87	2	1	84	206	2946	327.614	6.17627
	1374	P55786	Puromycin-sensitive aminopeptidase OS=Homo sapiens GN=NPEPPS PE=1 SV=2 - [PSA_HUMAN]	42.87	1	3	32	66	919	103.211	5.71924
	1375	Q7L3V2	Protein Bop OS=Homo sapiens GN=BOP PE=1 SV=1 - [BOP_HUMAN]	42.86	1	1	8	11	364	39.2742	5.04639
	1376	O15355	Protein phosphatase 1G OS=Homo sapiens GN=PPM1G PE=1 SV=1 - [PPM1G_HUMAN]	42.86	1	1	15	20	546	59.2347	4.36084
	1377	P35611-3	Isoform 3 of Alpha-adducin OS=Homo sapiens GN=ADD1 - [ADDA_HUMAN]	42.84	3	3	22	65	768	84.2504	5.96045
	1378	Q9ULW6	Nucleosome assembly protein 1-like 2 OS=Homo sapiens GN=NAP1L2 PE=2 SV=1 - [NP1L2_HUMAN]	42.83	1	1	10	44	460	52.5092	4.48779
	1379	Q58WW2-3	Isoform 3 of DDB1- and CUL4-associated factor 6 OS=Homo sapiens GN=DCAF6 - [DCAF6_HUMAN]	42.8	2	1	33	72	951	106.477	5.41455
	1380	Q2PPJ7-2	Isoform 2 of Ral GTPase-activating protein subunit alpha-2 OS=Homo sapiens GN=RALGAPA2 - [RGPA2_HUMAN]	42.79	3	1	57	182	1839	206.73	6.21436
	1381	O43683	Mitotic checkpoint serine/threonine-protein kinase BUB1 OS=Homo sapiens GN=BUB1 PE=1 SV=1 - [BUB1_HUMAN]	42.76	1	1	31	78	1085	122.297	6.46826
	1382	Q9H8M9	Protein eva-1 homolog A OS=Homo sapiens GN=EVA1A PE=2 SV=1 - [EVA1A_HUMAN]	42.76	1	1	4	16	152	17.4588	6.93213
	1383	Q9Y4K0	Lysyl oxidase homolog 2 OS=Homo sapiens GN=LOXL2 PE=1 SV=1 - [LOXL2_HUMAN]	42.76	1	1	23	52	774	86.6683	6.37939
	1384	A8MW99	Meiosis-specific protein MEI4-like OS=Homo sapiens GN=MEI4 PE=3 SV=1 - [MEI4L_HUMAN]	42.75	1	1	10	22	386	44.1556	6.16357
	1385	Q7Z2Y5	Nik-related protein kinase OS=Homo sapiens GN=NRK PE=1 SV=2 - [NRK_HUMAN]	42.73	2	1	43	76	1582	178.369	6.32861
	1386	Q92561	Phytanoyl-CoA hydroxylase-interacting protein OS=Homo sapiens GN=PHYHIP PE=1 SV=1 - [PHYIP_HUMAN]	42.73	1	1	9	26	330	37.5484	7.00537
	1387	P51959	Cyclin-G1 OS=Homo sapiens GN=CCNG1 PE=1 SV=2 - [CCNG1_HUMAN]	42.71	1	1	14	46	295	34.0519	8.80713
	1388	P49915	GMP synthase [glutamine-hydrolyzing] OS=Homo sapiens GN=GMPS PE=1 SV=1 - [GUAA_HUMAN]	42.71	1	1	18	27	693	76.667	6.87354
	1389	Q5ST30	Valine--tRNA ligase, mitochondrial OS=Homo sapiens GN=VARS2 PE=1 SV=2 - [SYVM_HUMAN]	42.71	3	1	32	53	1063	118.415	7.02002
	1390	P04264	Keratin, type II cytoskeletal 1 OS=Homo sapiens GN=KRT1 PE=1 SV=6 - [K2C1_HUMAN]	42.7	3	5	20	42	644	65.999	8.11865
	1391	Q92563	Testican-2 OS=Homo sapiens GN=SPOCK2 PE=1 SV=1 - [TICN2_HUMAN]	42.69	1	1	10	44	424	46.7489	4.83057
	1392	O60331-4	Isoform 4 of Phosphatidylinositol 4-phosphate 5-kinase type-1 gamma OS=Homo sapiens GN=PIP5K1C - [PI51C_HUMAN]	42.66	11	3	19	67	640	70.1702	5.41455
	1393	O15230	Laminin subunit alpha-5 OS=Homo sapiens GN=LAMA5 PE=1 SV=8 - [LAMA5_HUMAN]	42.65	3	12	101	241	3695	399.479	7.02002
	1394	O14646	Chromodomain-helicase-DNA-binding protein 1 OS=Homo sapiens GN=CHD1 PE=1 SV=2 - [CHD1_HUMAN]	42.63	2	1	55	111	1710	196.567	7.13721
	1395	Q9UKK3	Poly [ADP-ribose] polymerase 4 OS=Homo sapiens GN=PARP4 PE=1 SV=3 - [PARP4_HUMAN]	42.63	1	1	52	99	1724	192.472	5.65576
	1396	Q13535	Serine/threonine-protein kinase ATR OS=Homo sapiens GN=ATR PE=1 SV=3 - [ATR_HUMAN]	42.62	3	1	71	162	2644	301.172	7.43018
	1397	Q96LT7	Protein C9orf72 OS=Homo sapiens GN=C9orf72 PE=1 SV=2 - [CI072_HUMAN]	42.62	1	1	11	39	481	54.293	6.22705
	1398	P08648	Integrin alpha-5 OS=Homo sapiens GN=ITGA5 PE=1 SV=2 - [ITA5_HUMAN]	42.61	1	21	33	228	1049	114.465	5.77002
	1399	P22695	Cytochrome b-c1 complex subunit 2, mitochondrial OS=Homo sapiens GN=UQCRC2 PE=1 SV=3 - [QCR2_HUMAN]	42.6	1	1	14	34	453	48.4129	8.63135
	1400	P62701	40S ribosomal protein S4, X isoform OS=Homo sapiens GN=RPS4X PE=1 SV=2 - [RS4X_HUMAN]	42.59	3	7	12	58	263	29.5791	10.1548
	1401	Q9BX84-2	Isoform TRPM6b of Transient receptor potential cation channel subfamily M member 6 OS=Homo sapiens GN=TRPM6 - [TRPM6_HUMAN]	42.59	7	1	61	167	2017	230.893	7.81104
	1402	Q9HCE3	Zinc finger protein 532 OS=Homo sapiens GN=ZNF532 PE=1 SV=2 - [ZN532_HUMAN]	42.58	1	1	39	102	1301	141.606	8.646
	1403	Q96IQ9-2	Isoform 2 of Zinc finger protein 414 OS=Homo sapiens GN=ZNF414 - [ZN414_HUMAN]	42.56	2	1	8	13	390	40.9683	7.63525
	1404	O00231-2	Isoform 2 of 26S proteasome non-ATPase regulatory subunit 11 OS=Homo sapiens GN=PSMD11 - [PSD11_HUMAN]	42.55	2	4	16	29	423	47.5051	6.48096
	1405	O60684	Importin subunit alpha-7 OS=Homo sapiens GN=KPNA6 PE=1 SV=1 - [IMA7_HUMAN]	42.54	3	2	13	59	536	59.9915	4.98291
	1406	Q6P461-3	Isoform 3 of Acyl-coenzyme A synthetase ACSM6, mitochondrial OS=Homo sapiens GN=ACSM6 - [ACSM6_HUMAN]	42.49	2	1	18	36	506	56.5705	8.30908
	1407	Q96CT2	Kelch-like protein 29 OS=Homo sapiens GN=KLHL29 PE=2 SV=2 - [KLH29_HUMAN]	42.44	2	1	19	60	655	71.4222	6.78564
	1408	Q504Q3	PAB-dependent poly(A)-specific ribonuclease subunit 2 OS=Homo sapiens GN=PAN2 PE=1 SV=3 - [PAN2_HUMAN]	42.43	3	1	35	86	1202	135.281	5.98584
	1409	P0C874	Putative spermatogenesis-associated protein 31D3 OS=Homo sapiens GN=SPATA31D3 PE=5 SV=1 - [S31D3_HUMAN]	42.42	2	1	21	42	917	102.354	8.07471
	1410	Q14203-6	Isoform 6 of Dynactin subunit 1 OS=Homo sapiens GN=DCTN1 - [DCTN1_HUMAN]	42.41	6	2	41	97	1271	140.8	5.66846
	1411	Q86SQ4-2	Isoform 2 of G-protein coupled receptor 126 OS=Homo sapiens GN=GPR126 - [GP126_HUMAN]	42.41	4	2	32	71	1193	133.585	7.73779
	1412	Q5VTA0	PRAME family member 17 OS=Homo sapiens GN=PRAMEF17 PE=2 SV=1 - [PRA17_HUMAN]	42.41	2	1	17	39	474	54.7332	8.06006
	1413	Q8TER5	Rho guanine nucleotide exchange factor 40 OS=Homo sapiens GN=ARHGEF40 PE=1 SV=3 - [ARH40_HUMAN]	42.4	4	1	44	126	1519	164.555	6.15088
	1414	Q12774	Rho guanine nucleotide exchange factor 5 OS=Homo sapiens GN=ARHGEF5 PE=1 SV=3 - [ARHG5_HUMAN]	42.39	2	1	45	91	1597	176.69	5.52881
	1415	P78352-2	Isoform 2 of Disks large homolog 4 OS=Homo sapiens GN=DLG4 - [DLG4_HUMAN]	42.37	3	1	19	28	767	85.3775	5.87158
	1416	O14828-2	Isoform 2 of Secretory carrier-associated membrane protein 3 OS=Homo sapiens GN=SCAMP3 - [SCAM3_HUMAN]	42.37	2	1	6	14	321	35.1788	7.92822
	1417	Q8N3P4	Vacuolar protein sorting-associated protein 8 homolog OS=Homo sapiens GN=VPS8 PE=1 SV=3 - [VPS8_HUMAN]	42.37	3	2	41	89	1428	161.65	5.64307
	1418	Q86YA3	Uncharacterized protein C4orf21 OS=Homo sapiens GN=C4orf21 PE=2 SV=3 - [CD021_HUMAN]	42.35	5	2	60	126	2104	236.453	6.16357
	1419	P06753-2	Isoform 2 of Tropomyosin alpha-3 chain OS=Homo sapiens GN=TPM3 - [TPM3_HUMAN]	42.34	7	4	14	83	248	29.0147	4.77979
	1420	Q96L73	Histone-lysine N-methyltransferase, H3 lysine-36 and H4 lysine-20 specific OS=Homo sapiens GN=NSD1 PE=1 SV=1 - [NSD1_HUMAN]	42.32	3	1	79	161	2696	296.464	8.03076
	1421	Q9NSA0-2	Isoform 2 of Solute carrier family 22 member 11 OS=Homo sapiens GN=SLC22A11 - [S22AB_HUMAN]	42.31	2	1	14	30	442	48.2691	8.52881
	1422	Q8IY21	Probable ATP-dependent RNA helicase DDX60 OS=Homo sapiens GN=DDX60 PE=1 SV=3 - [DDX60_HUMAN]	42.29	1	1	50	102	1712	197.727	7.59131
	1423	Q9Y4E1-2	Isoform 2 of WASH complex subunit FAM21C OS=Homo sapiens GN=FAM21C - [FA21C_HUMAN]	42.29	6	1	34	64	1310	143.562	4.79248
	1424	Q86X45-2	Isoform 2 of Protein tilB homolog OS=Homo sapiens GN=LRRC6 - [TILB_HUMAN]	42.27	2	2	14	42	414	48.0888	6.55127
	1425	Q96KR1	Zinc finger RNA-binding protein OS=Homo sapiens GN=ZFR PE=1 SV=2 - [ZFR_HUMAN]	42.27	1	1	31	82	1074	116.939	9.0415
	1426	Q12913	Receptor-type tyrosine-protein phosphatase eta OS=Homo sapiens GN=PTPRJ PE=1 SV=3 - [PTPRJ_HUMAN]	42.26	1	2	34	74	1337	145.851	5.57959
	1427	Q0VF96	Cingulin-like protein 1 OS=Homo sapiens GN=CGNL1 PE=1 SV=2 - [CGNL1_HUMAN]	42.24	2	1	39	95	1302	148.989	5.66846
	1428	P27824	Calnexin OS=Homo sapiens GN=CANX PE=1 SV=2 - [CALX_HUMAN]	42.23	1	10	26	125	592	67.5259	4.60205
	1429	Q8NG11	Tetraspanin-14 OS=Homo sapiens GN=TSPAN14 PE=1 SV=1 - [TSN14_HUMAN]	42.22	3	3	8	61	270	30.6706	6.84424
	1430	Q8NDM7	WD repeat-containing protein 96 OS=Homo sapiens GN=WDR96 PE=2 SV=3 - [WDR96_HUMAN]	42.22	2	1	56	173	1665	191.861	5.98584
	1431	P00492	Hypoxanthine-guanine phosphoribosyltransferase OS=Homo sapiens GN=HPRT1 PE=1 SV=2 - [HPRT_HUMAN]	42.2	1	1	8	23	218	24.5636	6.68311
	1432	Q6UVY6-2	Isoform 2 of DBH-like monooxygenase protein 1 OS=Homo sapiens GN=MOXD1 - [MOXD1_HUMAN]	42.2	2	1	13	26	545	62.6601	6.07471
	1433	Q9H993	UPF0364 protein C6orf211 OS=Homo sapiens GN=C6orf211 PE=1 SV=1 - [CF211_HUMAN]	42.18	1	1	11	17	441	51.1399	5.75732
	1434	P39023	60S ribosomal protein L3 OS=Homo sapiens GN=RPL3 PE=1 SV=2 - [RL3_HUMAN]	42.18	1	3	14	27	403	46.0798	10.1841
	1435	Q92542	Nicastrin OS=Homo sapiens GN=NCSTN PE=1 SV=2 - [NICA_HUMAN]	42.17	2	3	19	44	709	78.3615	5.98584
	1436	P46782	40S ribosomal protein S5 OS=Homo sapiens GN=RPS5 PE=1 SV=4 - [RS5_HUMAN]	42.16	1	4	9	46	204	22.8621	9.71533
	1437	P51606	N-acylglucosamine 2-epimerase OS=Homo sapiens GN=RENBP PE=1 SV=2 - [RENBP_HUMAN]	42.15	1	1	13	23	427	48.799	6.3667
	1438	Q9HAT8	E3 ubiquitin-protein ligase pellino homolog 2 OS=Homo sapiens GN=PELI2 PE=1 SV=1 - [PELI2_HUMAN]	42.14	1	1	10	30	420	46.4058	7.32764
	1439	Q13620-1	Isoform 2 of Cullin-4B OS=Homo sapiens GN=CUL4B - [CUL4B_HUMAN]	42.12	5	2	29	74	895	102.235	7.94287
	1440	Q9Y2X9	Zinc finger protein 281 OS=Homo sapiens GN=ZNF281 PE=1 SV=1 - [ZN281_HUMAN]	42.12	1	1	21	40	895	96.8547	8.48486
	1441	O14578-4	Isoform 4 of Citron Rho-interacting kinase OS=Homo sapiens GN=CIT - [CTRO_HUMAN]	42.1	3	1	66	131	2069	236.459	6.66846
	1442	Q9ULH4	Leucine-rich repeat and fibronectin type-III domain-containing protein 2 OS=Homo sapiens GN=LRFN2 PE=1 SV=2 - [LRFN2_HUMAN]	42.08	1	1	18	59	789	84.6772	6.7417
	1443	Q7L1Q6-4	Isoform 4 of Basic leucine zipper and W2 domain-containing protein 1 OS=Homo sapiens GN=BZW1 - [BZW1_HUMAN]	42.08	4	2	13	21	423	48.477	5.92236
	1444	Q9P289	Serine/threonine-protein kinase MST4 OS=Homo sapiens GN=MST4 PE=1 SV=2 - [MST4_HUMAN]	42.07	4	1	14	38	416	46.4996	5.2876
	1445	Q93034	Cullin-5 OS=Homo sapiens GN=CUL5 PE=1 SV=4 - [CUL5_HUMAN]	42.05	1	1	26	40	780	90.8974	7.94287
	1446	P0CB43	Protein FAM203B OS=Homo sapiens GN=FAM203B PE=1 SV=1 - [F203B_HUMAN]	42.05	2	1	11	16	390	42.1017	4.83057
	1447	A2VDJ0-5	Isoform 4 of Transmembrane protein 131-like OS=Homo sapiens GN=KIAA0922 - [T131L_HUMAN]	42.05	3	1	44	93	1610	179.296	6.85889
	1448	Q5JUK3-2	Isoform 2 of Potassium channel subfamily T member 1 OS=Homo sapiens GN=KCNT1 - [KCNT1_HUMAN]	42.04	3	1	35	70	1256	141.913	7.35693
	1449	Q32P28-3	Isoform 3 of Prolyl 3-hydroxylase 1 OS=Homo sapiens GN=LEPRE1 - [P3H1_HUMAN]	42.04	2	1	23	67	804	90.5588	5.70654
	1450	P31153	S-adenosylmethionine synthase isoform type-2 OS=Homo sapiens GN=MAT2A PE=1 SV=1 - [METK2_HUMAN]	42.03	2	2	9	18	395	43.6333	6.48096
	1451	Q15116	Programmed cell death protein 1 OS=Homo sapiens GN=PDCD1 PE=1 SV=3 - [PDCD1_HUMAN]	42.01	1	1	8	12	288	31.627	8.01611
	1452	O95466	Formin-like protein 1 OS=Homo sapiens GN=FMNL1 PE=1 SV=3 - [FMNL_HUMAN]	42	3	1	36	96	1100	121.777	5.71924
	1453	O60391	Glutamate receptor ionotropic, NMDA 3B OS=Homo sapiens GN=GRIN3B PE=2 SV=2 - [NMD3B_HUMAN]	41.99	1	1	35	70	1043	112.921	9.20264
	1454	Q9UBN6	Tumor necrosis factor receptor superfamily member 10D OS=Homo sapiens GN=TNFRSF10D PE=1 SV=1 - [TR10D_HUMAN]	41.97	1	1	13	29	386	41.7968	6.53662
	1455	Q9H2S6	Tenomodulin OS=Homo sapiens GN=TNMD PE=2 SV=1 - [TNMD_HUMAN]	41.96	1	1	14	37	317	37.1062	5.18604
	1456	P06744	Glucose-6-phosphate isomerase OS=Homo sapiens GN=GPI PE=1 SV=4 - [G6PI_HUMAN]	41.94	3	7	22	67	558	63.1072	8.32373
	1457	Q13641	Trophoblast glycoprotein OS=Homo sapiens GN=TPBG PE=1 SV=1 - [TPBG_HUMAN]	41.9	1	2	11	36	420	46.0028	6.82959
	1458	Q9NYQ7	Cadherin EGF LAG seven-pass G-type receptor 3 OS=Homo sapiens GN=CELSR3 PE=1 SV=2 - [CELR3_HUMAN]	41.88	2	1	85	208	3312	357.961	6.68311
	1459	Q4G0X9	Coiled-coil domain-containing protein 40 OS=Homo sapiens GN=CCDC40 PE=2 SV=2 - [CCD40_HUMAN]	41.86	3	1	43	122	1142	130.033	5.2876
	1460	Q8IYY4	Zinc finger protein DZIP1L OS=Homo sapiens GN=DZIP1L PE=2 SV=2 - [DZI1L_HUMAN]	41.85	2	1	28	78	767	86.7946	7.28369
	1461	Q8IWT6	Leucine-rich repeat-containing protein 8A OS=Homo sapiens GN=LRRC8A PE=1 SV=1 - [LRC8A_HUMAN]	41.85	1	1	26	82	810	94.1387	7.94287
	1462	Q9Y5G7	Protocadherin gamma-A6 OS=Homo sapiens GN=PCDHGA6 PE=2 SV=1 - [PCDG6_HUMAN]	41.85	2	1	23	58	932	100.809	4.88135
	1463	P84098	60S ribosomal protein L19 OS=Homo sapiens GN=RPL19 PE=1 SV=1 - [RL19_HUMAN]	41.84	1	2	11	33	196	23.4512	11.4731
	1464	P04004	Vitronectin OS=Homo sapiens GN=VTN PE=1 SV=1 - [VTNC_HUMAN]	41.84	1	1	16	41	478	54.2712	5.79541
	1465	P20594	Atrial natriuretic peptide receptor 2 OS=Homo sapiens GN=NPR2 PE=1 SV=1 - [ANPRB_HUMAN]	41.83	2	1	32	46	1047	116.948	6.87354
	1466	Q01970	1-phosphatidylinositol 4,5-bisphosphate phosphodiesterase beta-3 OS=Homo sapiens GN=PLCB3 PE=1 SV=2 - [PLCB3_HUMAN]	41.82	2	5	38	87	1234	138.713	5.89697
	1467	O14495	Lipid phosphate phosphohydrolase 3 OS=Homo sapiens GN=PPAP2B PE=1 SV=1 - [LPP3_HUMAN]	41.8	1	1	9	38	311	35.093	9.14404
	1468	Q9HCK4	Roundabout homolog 2 OS=Homo sapiens GN=ROBO2 PE=1 SV=2 - [ROBO2_HUMAN]	41.8	3	1	42	97	1378	151.106	6.32861
	1469	Q92973-2	Isoform 2 of Transportin-1 OS=Homo sapiens GN=TNPO1 - [TNPO1_HUMAN]	41.8	5	4	26	83	890	101.244	4.95752
	1470	Q8NBC4	Uncharacterized protein C20orf203 OS=Homo sapiens GN=C20orf203 PE=2 SV=2 - [CT203_HUMAN]	41.75	1	1	6	82	194	21.146	11.7368
	1471	Q96RE7	Nucleus accumbens-associated protein 1 OS=Homo sapiens GN=NACC1 PE=1 SV=1 - [NACC1_HUMAN]	41.75	1	1	15	37	527	57.2218	5.74463
	1472	Q5JNZ5	Putative 40S ribosomal protein S26-like 1 OS=Homo sapiens GN=RPS26P11 PE=5 SV=1 - [RS26L_HUMAN]	41.74	2	1	4	12	115	12.994	10.5356
	1473	O75367-2	Isoform 1 of Core histone macro-H2A.1 OS=Homo sapiens GN=H2AFY - [H2AY_HUMAN]	41.73	3	2	10	21	369	39.1592	9.83252
	1474	P40123	Adenylyl cyclase-associated protein 2 OS=Homo sapiens GN=CAP2 PE=1 SV=1 - [CAP2_HUMAN]	41.72	1	1	16	30	477	52.7908	6.3667
	1475	P62277	40S ribosomal protein S13 OS=Homo sapiens GN=RPS13 PE=1 SV=2 - [RS13_HUMAN]	41.72	1	4	5	42	151	17.2117	10.5356
	1476	Q9UQ16-2	Isoform 2 of Dynamin-3 OS=Homo sapiens GN=DNM3 - [DYN3_HUMAN]	41.68	14	1	27	89	859	96.6214	8.22119
	1477	Q8TCU4-2	Isoform 2 of Alstrom syndrome protein 1 OS=Homo sapiens GN=ALMS1 - [ALMS1_HUMAN]	41.63	3	1	101	211	4120	454.795	6.20166
	1478	Q9P2D0	Inhibitor of Bruton tyrosine kinase OS=Homo sapiens GN=IBTK PE=1 SV=3 - [IBTK_HUMAN]	41.61	2	1	41	68	1353	150.432	7.7085
	1479	Q0JRZ9	FCH domain only protein 2 OS=Homo sapiens GN=FCHO2 PE=1 SV=2 - [FCHO2_HUMAN]	41.6	3	1	20	33	810	88.869	6.85889
	1480	Q8N5C8	TGF-beta-activated kinase 1 and MAP3K7-binding protein 3 OS=Homo sapiens GN=TAB3 PE=1 SV=2 - [TAB3_HUMAN]	41.57	2	1	20	43	712	78.6336	8.45557
	1481	Q9NXL9	DNA helicase MCM9 OS=Homo sapiens GN=MCM9 PE=1 SV=4 - [MCM9_HUMAN]	41.56	3	1	34	67	1143	127.233	7.73779
	1482	Q15102	Platelet-activating factor acetylhydrolase IB subunit gamma OS=Homo sapiens GN=PAFAH1B3 PE=1 SV=1 - [PA1B3_HUMAN]	41.56	1	1	5	8	231	25.7182	6.84424
	1483	Q6ZP65	Bicaudal D-related protein 1 OS=Homo sapiens GN=CCDC64 PE=2 SV=2 - [BICR1_HUMAN]	41.54	1	1	20	67	573	64.8007	4.99561
	1484	P35236-3	Isoform 3 of Tyrosine-protein phosphatase non-receptor type 7 OS=Homo sapiens GN=PTPN7 - [PTN7_HUMAN]	41.51	1	1	14	28	465	52.2794	7.54736
	1485	A2RU30-2	Isoform 2 of Protein TESPA1 OS=Homo sapiens GN=TESPA1 - [TESP1_HUMAN]	41.51	3	1	11	28	383	43.9468	7.81104
	1486	Q96LZ2	Melanoma-associated antigen B10 OS=Homo sapiens GN=MAGEB10 PE=2 SV=4 - [MAGBA_HUMAN]	41.5	1	1	12	42	347	38.9468	6.04932
	1487	P15086	Carboxypeptidase B OS=Homo sapiens GN=CPB1 PE=1 SV=4 - [CBPB1_HUMAN]	41.49	1	1	13	21	417	47.3378	6.60986
	1488	Q9Y5K6	CD2-associated protein OS=Homo sapiens GN=CD2AP PE=1 SV=1 - [CD2AP_HUMAN]	41.47	1	1	16	40	639	71.4073	6.40479
	1489	O60229-5	Isoform 5 of Kalirin OS=Homo sapiens GN=KALRN - [KALRN_HUMAN]	41.46	1	1	26	97	738	82.7536	6.50732
	1490	P01374	Lymphotoxin-alpha OS=Homo sapiens GN=LTA PE=1 SV=2 - [TNFB_HUMAN]	41.46	1	1	3	4	205	22.2826	9.05615
	1491	Q04771	Activin receptor type-1 OS=Homo sapiens GN=ACVR1 PE=1 SV=1 - [ACVR1_HUMAN]	41.45	1	1	15	30	509	57.1157	7.32764
	1492	Q9H8Y1	Vertnin OS=Homo sapiens GN=VRTN PE=1 SV=1 - [VRTN_HUMAN]	41.45	1	1	18	42	702	78.2102	9.01221
	1493	Q8WXG9	G-protein coupled receptor 98 OS=Homo sapiens GN=GPR98 PE=1 SV=2 - [GPR98_HUMAN]	41.44	2	2	137	263	6306	692.637	4.64014
	1494	A0AVT1	Ubiquitin-like modifier-activating enzyme 6 OS=Homo sapiens GN=UBA6 PE=1 SV=1 - [UBA6_HUMAN]	41.44	2	3	31	63	1052	117.895	6.13818
	1495	Q5SNV9-2	Isoform 2 of Uncharacterized protein C1orf167 OS=Homo sapiens GN=C1orf167 - [CA167_HUMAN]	41.41	2	1	44	112	1473	162.895	10.7261
	1496	Q96C03	Mitochondrial dynamic protein MID49 OS=Homo sapiens GN=SMCR7 PE=1 SV=1 - [MID49_HUMAN]	41.41	2	1	12	15	454	49.238	5.12256
	1497	Q9H2D6	TRIO and F-actin-binding protein OS=Homo sapiens GN=TRIOBP PE=1 SV=3 - [TARA_HUMAN]	41.4	5	1	67	161	2365	261.217	8.48486
	1498	Q9NUQ9	Protein FAM49B OS=Homo sapiens GN=FAM49B PE=1 SV=1 - [FA49B_HUMAN]	41.36	1	1	8	23	324	36.7246	6.06201
	1499	Q9NZJ4	Sacsin OS=Homo sapiens GN=SACS PE=1 SV=2 - [SACS_HUMAN]	41.36	2	1	139	313	4579	520.795	7.04932
	1500	O60493	Sorting nexin-3 OS=Homo sapiens GN=SNX3 PE=1 SV=3 - [SNX3_HUMAN]	41.36	5	2	8	22	162	18.7508	8.66064
	1501	P04920-2	Isoform B1 of Anion exchange protein 2 OS=Homo sapiens GN=SLC4A2 - [B3A2_HUMAN]	41.32	3	3	30	81	1227	135.52	6.21436
	1502	Q9BZG8	Diphthamide biosynthesis protein 1 OS=Homo sapiens GN=DPH1 PE=1 SV=2 - [DPH1_HUMAN]	41.31	3	1	11	29	443	48.7743	8.17725
	1503	Q9BQC3	Diphthamide biosynthesis protein 2 OS=Homo sapiens GN=DPH2 PE=1 SV=1 - [DPH2_HUMAN]	41.31	1	1	13	49	489	52.0498	5.52881
	1504	Q6ZNG2	Homeobox protein DBX2 OS=Homo sapiens GN=DBX2 PE=2 SV=2 - [DBX2_HUMAN]	41.3	1	1	8	12	339	36.5318	9.34912
	1505	Q6XYQ8	Synaptotagmin-10 OS=Homo sapiens GN=SYT10 PE=2 SV=1 - [SYT10_HUMAN]	41.3	1	1	15	52	523	59.0891	7.63525
	1506	P01130-4	Isoform 4 of Low-density lipoprotein receptor OS=Homo sapiens GN=LDLR - [LDLR_HUMAN]	41.27	5	1	22	49	819	90.8808	5.07178
	1507	O75095	Multiple epidermal growth factor-like domains protein 6 OS=Homo sapiens GN=MEGF6 PE=1 SV=4 - [MEGF6_HUMAN]	41.27	2	1	30	79	1541	161.072	6.37939
	1508	Q6P4A8	Phospholipase B-like 1 OS=Homo sapiens GN=PLBD1 PE=1 SV=2 - [PLBL1_HUMAN]	41.23	1	1	17	40	553	63.2142	9.05615
	1509	Q9NQW6	Actin-binding protein anillin OS=Homo sapiens GN=ANLN PE=1 SV=2 - [ANLN_HUMAN]	41.19	1	1	31	63	1124	124.122	8.07471
	1510	Q8NCN5	Pyruvate dehydrogenase phosphatase regulatory subunit, mitochondrial OS=Homo sapiens GN=PDPR PE=1 SV=2 - [PDPR_HUMAN]	41.18	1	1	28	95	879	99.3006	6.354
	1511	Q15813	Tubulin-specific chaperone E OS=Homo sapiens GN=TBCE PE=1 SV=1 - [TBCE_HUMAN]	41.18	1	1	18	35	527	59.309	6.75635
	1512	Q5T7M9	Protein FAM69A OS=Homo sapiens GN=FAM69A PE=2 SV=1 - [FA69A_HUMAN]	41.12	2	1	11	23	428	48.9917	7.1665
	1513	Q9H329	Band 4.1-like protein 4B OS=Homo sapiens GN=EPB41L4B PE=2 SV=2 - [E41LB_HUMAN]	41.11	1	1	23	78	900	99.65	9.0415
	1514	Q9Y2U5	Mitogen-activated protein kinase kinase kinase 2 OS=Homo sapiens GN=MAP3K2 PE=1 SV=2 - [M3K2_HUMAN]	41.03	1	1	21	45	619	69.6972	8.00146
	1515	Q9BV44	THUMP domain-containing protein 3 OS=Homo sapiens GN=THUMPD3 PE=1 SV=1 - [THUM3_HUMAN]	41.03	1	1	16	39	507	56.9668	6.3667
	1516	Q92995	Ubiquitin carboxyl-terminal hydrolase 13 OS=Homo sapiens GN=USP13 PE=1 SV=2 - [UBP13_HUMAN]	41.02	2	1	22	50	863	97.2651	5.52881
	1517	P55347-2	Isoform 2 of Homeobox protein PKNOX1 OS=Homo sapiens GN=PKNOX1 - [PKNX1_HUMAN]	40.99	1	1	10	28	405	44.6005	6.72705
	1518	Q03167-2	Isoform 2 of Transforming growth factor beta receptor type 3 OS=Homo sapiens GN=TGFBR3 - [TGBR3_HUMAN]	40.94	1	1	20	32	850	93.3688	5.70654
	1519	Q96MF2-2	Isoform 2 of SH3 and cysteine-rich domain-containing protein 3 OS=Homo sapiens GN=STAC3 - [STAC3_HUMAN]	40.92	2	1	11	18	325	37.1145	6.39209
	1520	P18077	60S ribosomal protein L35a OS=Homo sapiens GN=RPL35A PE=1 SV=2 - [RL35A_HUMAN]	40.91	1	1	5	14	110	12.5298	11.063
	1521	Q8NG84	Olfactory receptor 2AK2 OS=Homo sapiens GN=OR2AK2 PE=2 SV=2 - [O2AK2_HUMAN]	40.9	1	1	7	27	335	37.7378	9.01221
	1522	O15371	Eukaryotic translation initiation factor 3 subunit D OS=Homo sapiens GN=EIF3D PE=1 SV=1 - [EIF3D_HUMAN]	40.88	1	4	22	71	548	63.9324	6.04932
	1523	Q9H0E2	Toll-interacting protein OS=Homo sapiens GN=TOLLIP PE=1 SV=1 - [TOLIP_HUMAN]	40.88	1	2	11	48	274	30.2622	5.97314
	1524	Q08211	ATP-dependent RNA helicase A OS=Homo sapiens GN=DHX9 PE=1 SV=4 - [DHX9_HUMAN]	40.87	1	1	35	86	1270	140.869	6.84424
	1525	Q12792	Twinfilin-1 OS=Homo sapiens GN=TWF1 PE=1 SV=3 - [TWF1_HUMAN]	40.86	3	1	11	16	350	40.2577	6.96143
	1526	Q7Z5J8	Ankyrin and armadillo repeat-containing protein OS=Homo sapiens GN=ANKAR PE=2 SV=3 - [ANKAR_HUMAN]	40.79	3	2	40	97	1434	161.922	8.104
	1527	P49792	E3 SUMO-protein ligase RanBP2 OS=Homo sapiens GN=RANBP2 PE=1 SV=2 - [RBP2_HUMAN]	40.79	1	1	91	209	3224	357.974	6.20166
	1528	O14684	Prostaglandin E synthase OS=Homo sapiens GN=PTGES PE=1 SV=2 - [PTGES_HUMAN]	40.79	1	1	4	6	152	17.091	9.49561
	1529	Q7Z628	Neuroepithelial cell-transforming gene 1 protein OS=Homo sapiens GN=NET1 PE=1 SV=1 - [ARHG8_HUMAN]	40.77	2	1	21	58	596	67.6981	9.23193
	1530	O95886	Disks large-associated protein 3 OS=Homo sapiens GN=DLGAP3 PE=1 SV=3 - [DLGP3_HUMAN]	40.76	1	1	25	111	979	105.975	8.76318
	1531	Q05195-2	Isoform 2 of Max dimerization protein 1 OS=Homo sapiens GN=MXD1 - [MAD1_HUMAN]	40.76	2	1	6	63	211	24.0122	8.52881
	1532	Q93070	Ecto-ADP-ribosyltransferase 4 OS=Homo sapiens GN=ART4 PE=2 SV=2 - [NAR4_HUMAN]	40.76	1	1	9	10	314	35.8545	9.21729
	1533	Q15393	Splicing factor 3B subunit 3 OS=Homo sapiens GN=SF3B3 PE=1 SV=4 - [SF3B3_HUMAN]	40.76	2	1	35	76	1217	135.492	5.26221
	1534	Q9NR56-3	Isoform 3 of Muscleblind-like protein 1 OS=Homo sapiens GN=MBNL1 - [MBNL1_HUMAN]	40.73	2	1	9	23	302	33.0283	8.82178
	1535	Q6UB35	Monofunctional C1-tetrahydrofolate synthase, mitochondrial OS=Homo sapiens GN=MTHFD1L PE=1 SV=1 - [C1TM_HUMAN]	40.7	1	1	32	62	978	105.724	8.06006
	1536	P09619	Platelet-derived growth factor receptor beta OS=Homo sapiens GN=PDGFRB PE=1 SV=1 - [PGFRB_HUMAN]	40.69	13	1	30	54	1106	123.889	4.98291
	1537	P50502	Hsc70-interacting protein OS=Homo sapiens GN=ST13 PE=1 SV=2 - [F10A1_HUMAN]	40.65	3	4	13	35	369	41.3055	5.2749
	1538	Q5VT98	PRAME family member 20/21 OS=Homo sapiens GN=PRAMEF20 PE=2 SV=1 - [PRA20_HUMAN]	40.63	1	1	17	51	475	54.7333	8.06006
	1539	Q70EL1	Inactive ubiquitin carboxyl-terminal hydrolase 54 OS=Homo sapiens GN=USP54 PE=1 SV=4 - [UBP54_HUMAN]	40.62	5	1	42	98	1684	187.271	7.28369
	1540	Q8TDJ6	DmX-like protein 2 OS=Homo sapiens GN=DMXL2 PE=1 SV=2 - [DMXL2_HUMAN]	40.61	2	1	81	288	3036	339.427	6.37939
	1541	P54136	Arginine--tRNA ligase, cytoplasmic OS=Homo sapiens GN=RARS PE=1 SV=2 - [SYRC_HUMAN]	40.61	2	3	22	61	660	75.3309	6.68311
	1542	Q14246-3	Isoform 3 of EGF-like module-containing mucin-like hormone receptor-like 1 OS=Homo sapiens GN=EMR1 - [EMR1_HUMAN]	40.6	1	1	18	30	867	95.8808	6.81494
	1543	P20936	Ras GTPase-activating protein 1 OS=Homo sapiens GN=RASA1 PE=1 SV=1 - [RASA1_HUMAN]	40.59	2	1	32	68	1047	116.329	6.53662
	1544	Q96J84	Kin of IRRE-like protein 1 OS=Homo sapiens GN=KIRREL PE=1 SV=2 - [KIRR1_HUMAN]	40.55	3	2	22	48	757	83.4838	5.73193
	1545	Q07890	Son of sevenless homolog 2 OS=Homo sapiens GN=SOS2 PE=1 SV=2 - [SOS2_HUMAN]	40.54	2	1	41	130	1332	152.882	6.84424
	1546	A0AVI4-2	Isoform 2 of Transmembrane protein 129 OS=Homo sapiens GN=TMEM129 - [TM129_HUMAN]	40.52	1	1	6	9	232	25.8974	7.84033
	1547	Q86WG5	Myotubularin-related protein 13 OS=Homo sapiens GN=SBF2 PE=1 SV=1 - [MTMRD_HUMAN]	40.51	2	2	43	88	1849	208.333	7.06396
	1548	Q8IZY2	ATP-binding cassette sub-family A member 7 OS=Homo sapiens GN=ABCA7 PE=1 SV=3 - [ABCA7_HUMAN]	40.49	2	1	52	123	2146	234.201	7.23975
	1549	Q7LBC6	Lysine-specific demethylase 3B OS=Homo sapiens GN=KDM3B PE=1 SV=2 - [KDM3B_HUMAN]	40.49	3	1	46	119	1761	191.461	7.18115
	1550	Q9UL25	Ras-related protein Rab-21 OS=Homo sapiens GN=RAB21 PE=1 SV=3 - [RAB21_HUMAN]	40.44	1	1	10	23	225	24.3323	7.94287
	1551	O14815	Calpain-9 OS=Homo sapiens GN=CAPN9 PE=1 SV=1 - [CAN9_HUMAN]	40.43	2	1	18	40	690	79.0467	5.5542
	1552	Q9NSI2	Protein FAM207A OS=Homo sapiens GN=FAM207A PE=1 SV=2 - [F207A_HUMAN]	40.43	2	1	8	25	230	25.4408	11.0776
	1553	Q09428	ATP-binding cassette sub-family C member 8 OS=Homo sapiens GN=ABCC8 PE=1 SV=6 - [ABCC8_HUMAN]	40.42	2	1	40	96	1581	176.879	7.81104
	1554	Q8NDA8	Maestro heat-like repeat-containing protein family member 1 OS=Homo sapiens GN=MROH1 PE=2 SV=3 - [MROH1_HUMAN]	40.4	3	2	47	107	1641	181.134	6.88818
	1555	Q9C0F0	Putative Polycomb group protein ASXL3 OS=Homo sapiens GN=ASXL3 PE=2 SV=3 - [ASXL3_HUMAN]	40.39	2	1	57	127	2248	241.767	6.13818
	1556	Q5M775	Cytospin-B OS=Homo sapiens GN=SPECC1 PE=1 SV=1 - [CYTSB_HUMAN]	40.36	2	1	35	81	1068	118.512	6.69775
	1557	A6NFC9	Putative olfactory receptor 2W5 OS=Homo sapiens GN=OR2W5 PE=5 SV=1 - [OR2W5_HUMAN]	40.31	1	1	6	9	320	35.5047	6.84424
	1558	P09651-2	Isoform A1-A of Heterogeneous nuclear ribonucleoprotein A1 OS=Homo sapiens GN=HNRNPA1 - [ROA1_HUMAN]	40.31	4	4	11	33	320	34.1753	9.23193
	1559	Q5VXU9	Uncharacterized protein C9orf84 OS=Homo sapiens GN=C9orf84 PE=2 SV=1 - [CI084_HUMAN]	40.3	2	1	41	95	1444	165.097	5.21143
	1560	P02749	Beta-2-glycoprotein 1 OS=Homo sapiens GN=APOH PE=1 SV=3 - [APOH_HUMAN]	40.29	1	1	10	22	345	38.2727	7.97217
	1561	P15170	Eukaryotic peptide chain release factor GTP-binding subunit ERF3A OS=Homo sapiens GN=GSPT1 PE=1 SV=1 - [ERF3A_HUMAN]	40.28	3	1	11	31	499	55.7203	5.61768
	1562	Q99685-2	Isoform 2 of Monoglyceride lipase OS=Homo sapiens GN=MGLL - [MGLL_HUMAN]	40.28	2	1	7	11	283	31.1288	6.45557
	1563	Q9H4G4	Golgi-associated plant pathogenesis-related protein 1 OS=Homo sapiens GN=GLIPR2 PE=1 SV=3 - [GAPR1_HUMAN]	40.26	1	1	4	10	154	17.2075	9.40771
	1564	Q02218-2	Isoform 2 of 2-oxoglutarate dehydrogenase, mitochondrial OS=Homo sapiens GN=OGDH - [ODO1_HUMAN]	40.24	3	1	33	103	1019	115.44	7.02002
	1565	Q15477	Helicase SKI2W OS=Homo sapiens GN=SKIV2L PE=1 SV=3 - [SKIV2_HUMAN]	40.21	1	1	35	91	1246	137.668	6.06201
	1566	Q8TD20	Solute carrier family 2, facilitated glucose transporter member 12 OS=Homo sapiens GN=SLC2A12 PE=2 SV=1 - [GTR12_HUMAN]	40.19	1	1	14	25	617	66.9232	8.36768
	1567	Q9UKK9	ADP-sugar pyrophosphatase OS=Homo sapiens GN=NUDT5 PE=1 SV=1 - [NUDT5_HUMAN]	40.18	1	1	6	9	219	24.3122	4.94482
	1568	Q9TNN7	HLA class I histocompatibility antigen, Cw-5 alpha chain OS=Homo sapiens GN=HLA-C PE=2 SV=1 - [1C05_HUMAN]	40.16	6	2	12	107	366	40.8863	7.44482
	1569	Q6ZNH5	Zinc finger protein 497 OS=Homo sapiens GN=ZNF497 PE=2 SV=2 - [ZN497_HUMAN]	40.16	1	1	12	18	498	54.6863	8.93896
	1570	P61160	Actin-related protein 2 OS=Homo sapiens GN=ACTR2 PE=1 SV=1 - [ARP2_HUMAN]	40.1	2	2	12	29	394	44.7322	6.7417
	1571	Q6ZMZ0-4	Isoform 4 of E3 ubiquitin-protein ligase RNF19B OS=Homo sapiens GN=RNF19B - [RN19B_HUMAN]	40.08	2	1	21	29	731	77.7599	6.26514
	1572	O76013	Keratin, type I cuticular Ha6 OS=Homo sapiens GN=KRT36 PE=1 SV=1 - [KRT36_HUMAN]	40.04	4	1	18	75	467	52.214	4.94482
	1573	O94919	Endonuclease domain-containing 1 protein OS=Homo sapiens GN=ENDOD1 PE=1 SV=2 - [ENDD1_HUMAN]	40	1	1	16	33	500	54.9813	5.70654
	1574	O15439-2	Isoform 2 of Multidrug resistance-associated protein 4 OS=Homo sapiens GN=ABCC4 - [MRP4_HUMAN]	39.98	2	1	44	85	1278	144.109	8.19189
	1575	Q7Z3I7	Zinc finger protein 572 OS=Homo sapiens GN=ZNF572 PE=2 SV=1 - [ZN572_HUMAN]	39.89	1	1	13	41	529	61.1985	8.00146
	1576	Q5TIA1	Meiosis inhibitor protein 1 OS=Homo sapiens GN=MEI1 PE=2 SV=2 - [MEI1_HUMAN]	39.87	3	1	34	64	1274	141.071	6.69775
	1577	Q9C0E4-2	Isoform 2 of Glutamate receptor-interacting protein 2 OS=Homo sapiens GN=GRIP2 - [GRIP2_HUMAN]	39.86	2	2	22	64	873	93.5663	6.50732
	1578	O15235	28S ribosomal protein S12, mitochondrial OS=Homo sapiens GN=MRPS12 PE=1 SV=1 - [RT12_HUMAN]	39.86	1	1	4	23	138	15.163	10.2866
	1579	Q8TAA9-2	Isoform 2 of Vang-like protein 1 OS=Homo sapiens GN=VANGL1 - [VANG1_HUMAN]	39.85	2	1	17	44	522	59.7101	8.80713
	1580	O75528	Transcriptional adapter 3 OS=Homo sapiens GN=TADA3 PE=1 SV=1 - [TADA3_HUMAN]	39.81	2	1	14	24	432	48.8723	6.26514
	1581	Q9GZU2	Paternally-expressed gene 3 protein OS=Homo sapiens GN=PEG3 PE=1 SV=1 - [PEG3_HUMAN]	39.8	3	1	47	77	1588	180.715	5.47803
	1582	Q96M86	Dynein heavy chain domain-containing protein 1 OS=Homo sapiens GN=DNHD1 PE=2 SV=2 - [DNHD1_HUMAN]	39.79	1	1	134	289	4753	533.305	6.7124
	1583	Q9BVI0	PHD finger protein 20 OS=Homo sapiens GN=PHF20 PE=1 SV=2 - [PHF20_HUMAN]	39.72	1	1	27	45	1012	115.314	6.99072
	1584	P55011-3	Isoform 2 of Solute carrier family 12 member 2 OS=Homo sapiens GN=SLC12A2 - [S12A2_HUMAN]	39.72	2	1	30	51	1196	129.597	6.45557
	1585	Q9Y639	Neuroplastin OS=Homo sapiens GN=NPTN PE=1 SV=2 - [NPTN_HUMAN]	39.7	5	2	17	91	398	44.3595	7.98682
	1586	Q9BX67	Junctional adhesion molecule C OS=Homo sapiens GN=JAM3 PE=1 SV=1 - [JAM3_HUMAN]	39.68	1	1	7	18	310	34.9978	7.59131
	1587	P43004-2	Isoform 2 of Excitatory amino acid transporter 2 OS=Homo sapiens GN=SLC1A2 - [EAA2_HUMAN]	39.65	1	1	15	34	565	61.1884	6.66846
	1588	P16499	Rod cGMP-specific 3',5'-cyclic phosphodiesterase subunit alpha OS=Homo sapiens GN=PDE6A PE=1 SV=4 - [PDE6A_HUMAN]	39.65	1	1	25	64	860	99.4828	5.71924
	1589	Q9Y6N6	Laminin subunit gamma-3 OS=Homo sapiens GN=LAMC3 PE=1 SV=3 - [LAMC3_HUMAN]	39.56	1	1	38	88	1575	171.117	6.58057
	1590	Q9H1K0	Rabenosyn-5 OS=Homo sapiens GN=ZFYVE20 PE=1 SV=2 - [RBNS5_HUMAN]	39.54	1	1	25	73	784	88.8145	5.50342
	1591	Q8N1T3	Unconventional myosin-Ih OS=Homo sapiens GN=MYO1H PE=2 SV=2 - [MYO1H_HUMAN]	39.53	1	2	29	69	1032	118.962	9.08545
	1592	Q71F56	Mediator of RNA polymerase II transcription subunit 13-like OS=Homo sapiens GN=MED13L PE=1 SV=1 - [MD13L_HUMAN]	39.5	1	1	50	128	2210	242.447	6.03662
	1593	Q9BYC5	Alpha-(1,6)-fucosyltransferase OS=Homo sapiens GN=FUT8 PE=1 SV=2 - [FUT8_HUMAN]	39.48	2	1	13	33	575	66.474	7.66455
	1594	Q76N89	E3 ubiquitin-protein ligase HECW1 OS=Homo sapiens GN=HECW1 PE=1 SV=3 - [HECW1_HUMAN]	39.48	1	1	41	56	1606	179.442	5.50342
	1595	Q6GTS8	Probable carboxypeptidase PM20D1 OS=Homo sapiens GN=PM20D1 PE=2 SV=3 - [P20D1_HUMAN]	39.44	1	1	15	35	502	55.7062	6.66846
	1596	O00144	Frizzled-9 OS=Homo sapiens GN=FZD9 PE=2 SV=1 - [FZD9_HUMAN]	39.42	1	1	11	15	591	64.4235	8.25049
	1597	Q9BW71	HIRA-interacting protein 3 OS=Homo sapiens GN=HIRIP3 PE=1 SV=3 - [HIRP3_HUMAN]	39.39	3	1	22	67	556	61.92	8.54346
	1598	P21291	Cysteine and glycine-rich protein 1 OS=Homo sapiens GN=CSRP1 PE=1 SV=3 - [CSRP1_HUMAN]	39.38	1	1	7	24	193	20.5538	8.57275
	1599	Q8TE82	SH3 domain and tetratricopeptide repeat-containing protein 1 OS=Homo sapiens GN=SH3TC1 PE=1 SV=3 - [S3TC1_HUMAN]	39.37	1	1	37	93	1336	146.868	6.25244
	1600	Q5T1N1	Protein AKNAD1 OS=Homo sapiens GN=AKNAD1 PE=2 SV=3 - [AKND1_HUMAN]	39.35	3	1	21	59	836	92.8069	6.81494
	1601	Q8WXJ9	Ankyrin repeat and SOCS box protein 17 OS=Homo sapiens GN=ASB17 PE=2 SV=2 - [ASB17_HUMAN]	39.32	1	1	8	16	295	34.2601	8.79248
	1602	P49207	60S ribosomal protein L34 OS=Homo sapiens GN=RPL34 PE=1 SV=3 - [RL34_HUMAN]	39.32	1	3	5	20	117	13.2845	11.4731
	1603	Q96F44	E3 ubiquitin-protein ligase TRIM11 OS=Homo sapiens GN=TRIM11 PE=1 SV=2 - [TRI11_HUMAN]	39.32	3	1	12	31	468	52.7405	5.69385
	1604	P18084	Integrin beta-5 OS=Homo sapiens GN=ITGB5 PE=1 SV=1 - [ITB5_HUMAN]	39.3	1	3	22	66	799	87.9962	6.06201
	1605	Q6WRI0	Immunoglobulin superfamily member 10 OS=Homo sapiens GN=IGSF10 PE=2 SV=1 - [IGS10_HUMAN]	39.27	1	1	71	156	2623	290.655	9.12939
	1606	Q9HBJ7	Ubiquitin carboxyl-terminal hydrolase 29 OS=Homo sapiens GN=USP29 PE=2 SV=1 - [UBP29_HUMAN]	39.26	1	1	27	65	922	104.09	5.90967
	1607	Q03468	DNA excision repair protein ERCC-6 OS=Homo sapiens GN=ERCC6 PE=1 SV=1 - [ERCC6_HUMAN]	39.25	1	1	50	135	1493	168.311	8.08936
	1608	P08151-2	Isoform 2 of Zinc finger protein GLI1 OS=Homo sapiens GN=GLI1 - [GLI1_HUMAN]	39.25	1	1	32	72	1065	113.604	7.32764
	1609	P54687-4	Isoform 4 of Branched-chain-amino-acid aminotransferase, cytosolic OS=Homo sapiens GN=BCAT1 - [BCAT1_HUMAN]	39.22	3	1	9	15	385	42.8104	5.22412
	1610	P60981-2	Isoform 2 of Destrin OS=Homo sapiens GN=DSTN - [DEST_HUMAN]	39.19	2	2	5	11	148	16.6096	8.33838
	1611	Q8IVU1	Immunoglobulin superfamily DCC subclass member 3 OS=Homo sapiens GN=IGDCC3 PE=2 SV=2 - [IGDC3_HUMAN]	39.19	1	1	22	55	814	86.6698	7.63525
	1612	O14920	Inhibitor of nuclear factor kappa-B kinase subunit beta OS=Homo sapiens GN=IKBKB PE=1 SV=1 - [IKKB_HUMAN]	39.15	3	1	22	78	756	86.5089	5.78271
	1613	Q9NQC3-2	Isoform 2 of Reticulon-4 OS=Homo sapiens GN=RTN4 - [RTN4_HUMAN]	39.14	6	4	9	18	373	40.2929	4.77979
	1614	P98160	Basement membrane-specific heparan sulfate proteoglycan core protein OS=Homo sapiens GN=HSPG2 PE=1 SV=4 - [PGBM_HUMAN]	39.13	1	2	91	220	4391	468.532	6.50732
	1615	P62750	60S ribosomal protein L23a OS=Homo sapiens GN=RPL23A PE=1 SV=1 - [RL23A_HUMAN]	39.1	1	1	7	27	156	17.6841	10.4478
	1616	Q92614-4	Isoform 4 of Unconventional myosin-XVIIIa OS=Homo sapiens GN=MYO18A - [MY18A_HUMAN]	39.09	5	1	59	159	2039	231.097	6.20166
	1617	Q9NZT1	Calmodulin-like protein 5 OS=Homo sapiens GN=CALML5 PE=1 SV=2 - [CALL5_HUMAN]	39.04	1	1	5	48	146	15.8828	4.43701
	1618	Q92576	PHD finger protein 3 OS=Homo sapiens GN=PHF3 PE=1 SV=3 - [PHF3_HUMAN]	39.04	2	1	52	127	2039	229.339	6.96143
	1619	Q6P9B6	TLD domain-containing protein 1 OS=Homo sapiens GN=TLDC1 PE=1 SV=2 - [TLDC1_HUMAN]	39.04	1	1	12	29	456	50.9611	6.23975
	1620	Q08722	Leukocyte surface antigen CD47 OS=Homo sapiens GN=CD47 PE=1 SV=1 - [CD47_HUMAN]	39.01	4	2	9	29	323	35.1907	7.21045
	1621	Q15468-2	Isoform 2 of SCL-interrupting locus protein OS=Homo sapiens GN=STIL - [STIL_HUMAN]	38.98	2	1	29	104	1288	142.951	6.45557
	1622	Q6N022	Teneurin-4 OS=Homo sapiens GN=TENM4 PE=1 SV=2 - [TEN4_HUMAN]	38.97	1	1	71	151	2769	307.761	6.55127
	1623	Q9ULV0	Unconventional myosin-Vb OS=Homo sapiens GN=MYO5B PE=1 SV=3 - [MYO5B_HUMAN]	38.96	1	2	53	215	1848	213.538	7.1958
	1624	P23588	Eukaryotic translation initiation factor 4B OS=Homo sapiens GN=EIF4B PE=1 SV=2 - [IF4B_HUMAN]	38.95	1	2	21	87	611	69.1103	5.73193
	1625	Q14627	Interleukin-13 receptor subunit alpha-2 OS=Homo sapiens GN=IL13RA2 PE=1 SV=1 - [I13R2_HUMAN]	38.95	1	1	10	13	380	44.1478	4.97021
	1626	Q13418	Integrin-linked protein kinase OS=Homo sapiens GN=ILK PE=1 SV=2 - [ILK_HUMAN]	38.94	1	1	19	42	452	51.3859	8.07471
	1627	Q86WR0	Coiled-coil domain-containing protein 25 OS=Homo sapiens GN=CCDC25 PE=1 SV=2 - [CCD25_HUMAN]	38.94	1	1	7	18	208	24.4631	6.80029
	1628	Q8NC51-3	Isoform 3 of Plasminogen activator inhibitor 1 RNA-binding protein OS=Homo sapiens GN=SERBP1 - [PAIRB_HUMAN]	38.93	4	1	13	45	393	43.1096	8.44092
	1629	Q9H7T3	Uncharacterized protein C10orf95 OS=Homo sapiens GN=C10orf95 PE=1 SV=1 - [CJ095_HUMAN]	38.91	1	1	6	21	257	26.2529	11.6929
	1630	Q02878	60S ribosomal protein L6 OS=Homo sapiens GN=RPL6 PE=1 SV=3 - [RL6_HUMAN]	38.89	1	5	12	56	288	32.7076	10.5796
	1631	P22105	Tenascin-X OS=Homo sapiens GN=TNXB PE=1 SV=3 - [TENX_HUMAN]	38.87	2	1	99	207	4289	464.034	5.33838
	1632	Q9Y4D8	Probable E3 ubiquitin-protein ligase HECTD4 OS=Homo sapiens GN=HECTD4 PE=1 SV=5 - [HECD4_HUMAN]	38.84	3	1	101	264	3996	439.065	6.18896
	1633	A2RRP1	Neuroblastoma-amplified sequence OS=Homo sapiens GN=NBAS PE=1 SV=2 - [NBAS_HUMAN]	38.84	2	1	63	183	2371	268.401	5.96045
	1634	Q8TF39	Zinc finger protein 483 OS=Homo sapiens GN=ZNF483 PE=1 SV=3 - [ZN483_HUMAN]	38.84	1	1	18	64	744	85.0441	8.57275
	1635	Q9NR50-2	Isoform 2 of Translation initiation factor eIF-2B subunit gamma OS=Homo sapiens GN=EIF2B3 - [EI2BG_HUMAN]	38.83	1	1	12	26	412	46.1148	7.12256
	1636	P43487	Ran-specific GTPase-activating protein OS=Homo sapiens GN=RANBP1 PE=1 SV=1 - [RANG_HUMAN]	38.81	1	3	5	21	201	23.2956	5.2876
	1637	Q2VIR3	Putative eukaryotic translation initiation factor 2 subunit 3-like protein OS=Homo sapiens GN=EIF2S3L PE=5 SV=2 - [IF2GL_HUMAN]	38.77	3	2	14	40	472	51.1962	8.39697
	1638	Q8TDM6-4	Isoform 4 of Disks large homolog 5 OS=Homo sapiens GN=DLG5 - [DLG5_HUMAN]	38.7	3	1	49	123	1809	201.933	7.7085
	1639	Q03060-25	Isoform 22 of cAMP-responsive element modulator OS=Homo sapiens GN=CREM - [CREM_HUMAN]	38.69	1	1	3	11	137	14.8624	4.76709
	1640	Q7Z6Z7-2	Isoform 2 of E3 ubiquitin-protein ligase HUWE1 OS=Homo sapiens GN=HUWE1 - [HUWE1_HUMAN]	38.69	3	1	110	319	4358	479.897	5.23682
	1641	Q6P0N0	Mis18-binding protein 1 OS=Homo sapiens GN=MIS18BP1 PE=1 SV=1 - [M18BP_HUMAN]	38.69	1	1	33	83	1132	129.005	9.24658
	1642	Q6ZS81	WD repeat- and FYVE domain-containing protein 4 OS=Homo sapiens GN=WDFY4 PE=1 SV=3 - [WDFY4_HUMAN]	38.69	3	1	68	153	3184	353.384	6.31592
	1643	Q96MG2	Junctional sarcoplasmic reticulum protein 1 OS=Homo sapiens GN=JSRP1 PE=1 SV=1 - [JSPR1_HUMAN]	38.67	1	1	11	21	331	36.2967	9.37842
	1644	O95359	Transforming acidic coiled-coil-containing protein 2 OS=Homo sapiens GN=TACC2 PE=1 SV=3 - [TACC2_HUMAN]	38.6	6	1	66	137	2948	309.237	4.79248
	1645	Q96NU0	Contactin-associated protein-like 3B OS=Homo sapiens GN=CNTNAP3B PE=2 SV=2 - [CNT3B_HUMAN]	38.59	3	1	33	78	1288	140.379	7.53271
	1646	O15287	Fanconi anemia group G protein OS=Homo sapiens GN=FANCG PE=1 SV=1 - [FANCG_HUMAN]	38.59	1	1	15	30	622	68.5106	5.46533
	1647	Q9BWV2	Spermatogenesis-associated protein 9 OS=Homo sapiens GN=SPATA9 PE=2 SV=2 - [SPAT9_HUMAN]	38.58	2	1	9	39	254	28.7224	9.48096
	1648	Q9P104	Docking protein 5 OS=Homo sapiens GN=DOK5 PE=1 SV=2 - [DOK5_HUMAN]	38.56	2	1	9	21	306	35.4409	8.79248
	1649	Q08345	Epithelial discoidin domain-containing receptor 1 OS=Homo sapiens GN=DDR1 PE=1 SV=1 - [DDR1_HUMAN]	38.55	4	1	24	77	913	101.063	6.82959
	1650	P35527	Keratin, type I cytoskeletal 9 OS=Homo sapiens GN=KRT9 PE=1 SV=3 - [K1C9_HUMAN]	38.52	1	1	16	36	623	62.0268	5.23682
	1651	Q9BWV1	Brother of CDO OS=Homo sapiens GN=BOC PE=1 SV=1 - [BOC_HUMAN]	38.51	3	2	22	56	1114	120.983	7.00537
	1652	O14964	Hepatocyte growth factor-regulated tyrosine kinase substrate OS=Homo sapiens GN=HGS PE=1 SV=1 - [HGS_HUMAN]	38.48	2	1	20	30	777	86.1376	6.16357
	1653	O60721-2	Isoform 2 of Sodium/potassium/calcium exchanger 1 OS=Homo sapiens GN=SLC24A1 - [NCKX1_HUMAN]	38.48	2	1	25	103	1081	119.405	4.94482
	1654	Q12767	Uncharacterized protein KIAA0195 OS=Homo sapiens GN=KIAA0195 PE=1 SV=1 - [K0195_HUMAN]	38.42	2	1	25	52	1356	151.054	6.44287
	1655	Q15043-3	Isoform 3 of Zinc transporter ZIP14 OS=Homo sapiens GN=SLC39A14 - [S39AE_HUMAN]	38.41	3	3	11	72	492	54.0222	5.13525
	1656	Q9H3Z7	Abhydrolase domain-containing protein 16B OS=Homo sapiens GN=ABHD16B PE=2 SV=1 - [ABHGB_HUMAN]	38.38	1	1	13	29	469	52.521	8.57275
	1657	P01031	Complement C5 OS=Homo sapiens GN=C5 PE=1 SV=4 - [CO5_HUMAN]	38.37	1	1	41	75	1676	188.186	6.52197
	1658	P0C671	Uncharacterized protein C6orf222 OS=Homo sapiens GN=C6orf222 PE=1 SV=1 - [CF222_HUMAN]	38.34	1	1	18	34	652	71.8863	8.47021
	1659	Q8N2K0-3	Isoform 3 of Monoacylglycerol lipase ABHD12 OS=Homo sapiens GN=ABHD12 - [ABD12_HUMAN]	38.33	3	1	9	43	360	41.3604	8.80713
	1660	Q6DT37	Serine/threonine-protein kinase MRCK gamma OS=Homo sapiens GN=CDC42BPG PE=1 SV=2 - [MRCKG_HUMAN]	38.3	1	1	42	95	1551	172.352	6.27783
	1661	Q9HCP6	Protein-cysteine N-palmitoyltransferase HHAT-like protein OS=Homo sapiens GN=HHATL PE=2 SV=1 - [HHATL_HUMAN]	38.29	1	1	15	24	504	56.6662	7.12256
	1662	Q13698	Voltage-dependent L-type calcium channel subunit alpha-1S OS=Homo sapiens GN=CACNA1S PE=1 SV=4 - [CAC1S_HUMAN]	38.28	1	1	49	118	1873	212.212	6.56592
	1663	Q9HD42	Charged multivesicular body protein 1a OS=Homo sapiens GN=CHMP1A PE=1 SV=1 - [CHM1A_HUMAN]	38.27	2	2	9	19	196	21.6892	8.06006
	1664	O75054	Immunoglobulin superfamily member 3 OS=Homo sapiens GN=IGSF3 PE=2 SV=3 - [IGSF3_HUMAN]	38.27	2	1	35	100	1194	135.112	6.07471
	1665	Q02156	Protein kinase C epsilon type OS=Homo sapiens GN=PRKCE PE=1 SV=1 - [KPCE_HUMAN]	38.26	1	1	24	37	737	83.6201	7.12256
	1666	Q86T65-4	Isoform 2 of Disheveled-associated activator of morphogenesis 2 OS=Homo sapiens GN=DAAM2 - [DAAM2_HUMAN]	38.24	2	1	35	96	1067	123.291	6.85889
	1667	Q8TBX8-3	Isoform 3 of Phosphatidylinositol 5-phosphate 4-kinase type-2 gamma OS=Homo sapiens GN=PIP4K2C - [PI42C_HUMAN]	38.21	3	2	12	47	403	45.0249	6.48096
	1668	Q8NF86	Serine protease 33 OS=Homo sapiens GN=PRSS33 PE=1 SV=3 - [PRS33_HUMAN]	38.21	1	1	6	18	280	29.7675	9.93506
	1669	Q9H1C7	Cysteine-rich and transmembrane domain-containing protein 1 OS=Homo sapiens GN=CYSTM1 PE=1 SV=1 - [CYTM1_HUMAN]	38.14	1	1	3	5	97	10.6238	4.32275
	1670	P62316	Small nuclear ribonucleoprotein Sm D2 OS=Homo sapiens GN=SNRPD2 PE=1 SV=1 - [SMD2_HUMAN]	38.14	2	1	4	11	118	13.5182	9.90576
	1671	Q5VT52-3	Isoform 3 of Regulation of nuclear pre-mRNA domain-containing protein 2 OS=Homo sapiens GN=RPRD2 - [RPRD2_HUMAN]	38.12	3	1	36	74	1435	152.782	6.97607
	1672	A8MXV6	CMT1A duplicated region transcript 15 protein-like protein OS=Homo sapiens GN=CDRT15L2 PE=2 SV=1 - [CD15L_HUMAN]	38.08	1	1	6	23	281	30.0807	9.36377
	1673	Q3SXZ3	Zinc finger protein 718 OS=Homo sapiens GN=ZNF718 PE=2 SV=1 - [ZN718_HUMAN]	38.08	1	1	13	21	478	55.3688	9.45166
	1674	Q6ZWH5	Serine/threonine-protein kinase Nek10 OS=Homo sapiens GN=NEK10 PE=2 SV=3 - [NEK10_HUMAN]	38.05	4	1	29	73	1172	133.176	6.80029
	1675	P62899-3	Isoform 3 of 60S ribosomal protein L31 OS=Homo sapiens GN=RPL31 - [RL31_HUMAN]	38.02	3	1	6	13	121	13.9868	10.7993
	1676	Q96ST3	Paired amphipathic helix protein Sin3a OS=Homo sapiens GN=SIN3A PE=1 SV=2 - [SIN3A_HUMAN]	38.02	1	1	34	70	1273	145.085	7.25439
	1677	Q8N7K9	Uncharacterized protein FLJ40925 OS=Homo sapiens PE=2 SV=1 - [YS059_HUMAN]	38.01	1	1	9	18	584	59.8264	10.2427
	1678	Q9H444	Charged multivesicular body protein 4b OS=Homo sapiens GN=CHMP4B PE=1 SV=1 - [CHM4B_HUMAN]	37.95	1	3	7	34	224	24.9346	4.81787
	1679	Q86UK7-2	Isoform 2 of Zinc finger protein 598 OS=Homo sapiens GN=ZNF598 - [ZN598_HUMAN]	37.95	4	1	20	39	896	97.7447	8.27979
	1680	Q99808	Equilibrative nucleoside transporter 1 OS=Homo sapiens GN=SLC29A1 PE=1 SV=3 - [S29A1_HUMAN]	37.94	1	3	12	54	456	50.1864	8.29443
	1681	Q5VWN6	Protein FAM208B OS=Homo sapiens GN=FAM208B PE=1 SV=1 - [F208B_HUMAN]	37.86	2	1	53	142	2430	268.675	5.89697
	1682	Q7RTU9	Stereocilin OS=Homo sapiens GN=STRC PE=2 SV=1 - [STRC_HUMAN]	37.86	2	1	33	40	1775	192.844	5.41455
	1683	Q9NP72	Ras-related protein Rab-18 OS=Homo sapiens GN=RAB18 PE=1 SV=1 - [RAB18_HUMAN]	37.86	1	1	6	7	206	22.9626	5.23682
	1684	Q9UBS5-4	Isoform 1D of Gamma-aminobutyric acid type B receptor subunit 1 OS=Homo sapiens GN=GABBR1 - [GABR1_HUMAN]	37.81	5	1	26	61	931	104.599	7.97217
	1685	P31260	Homeobox protein Hox-A10 OS=Homo sapiens GN=HOXA10 PE=1 SV=3 - [HXA10_HUMAN]	37.8	1	1	8	9	410	42.3877	8.33838
	1686	A8MVW0	Protein FAM171A2 OS=Homo sapiens GN=FAM171A2 PE=1 SV=1 - [F1712_HUMAN]	37.77	1	1	19	36	826	87.3812	8.04541
	1687	Q14517	Protocadherin Fat 1 OS=Homo sapiens GN=FAT1 PE=1 SV=2 - [FAT1_HUMAN]	37.75	1	2	109	181	4588	505.958	4.99561
	1688	A2RUT3	Transmembrane protein 89 OS=Homo sapiens GN=TMEM89 PE=2 SV=1 - [TMM89_HUMAN]	37.74	1	1	4	13	159	17.5603	10.0083
	1689	Q8WWI5-3	Isoform 3 of Choline transporter-like protein 1 OS=Homo sapiens GN=SLC44A1 - [CTL1_HUMAN]	37.73	3	2	17	35	652	72.9632	8.646
	1690	P17812	CTP synthase 1 OS=Homo sapiens GN=CTPS1 PE=1 SV=2 - [PYRG1_HUMAN]	37.73	1	1	15	39	591	66.648	6.45557
	1691	Q8N6S4	Ankyrin repeat domain-containing protein 13C OS=Homo sapiens GN=ANKRD13C PE=2 SV=2 - [AN13C_HUMAN]	37.71	2	1	17	45	541	60.7802	6.93213
	1692	Q8WWR8-2	Isoform 2 of Sialidase-4 OS=Homo sapiens GN=NEU4 - [NEUR4_HUMAN]	37.7	3	1	13	34	496	52.9045	7.94287
	1693	Q5T6X5	G-protein coupled receptor family C group 6 member A OS=Homo sapiens GN=GPRC6A PE=1 SV=1 - [GPC6A_HUMAN]	37.69	3	1	22	43	926	104.684	7.95752
	1694	Q9UBV8	Peflin OS=Homo sapiens GN=PEF1 PE=1 SV=1 - [PEF1_HUMAN]	37.68	1	1	10	21	284	30.3613	6.53662
	1695	Q9P217	Zinc finger SWIM domain-containing protein 5 OS=Homo sapiens GN=ZSWIM5 PE=2 SV=2 - [ZSWM5_HUMAN]	37.64	1	1	33	82	1185	130.551	7.18115
	1696	Q99683	Mitogen-activated protein kinase kinase kinase 5 OS=Homo sapiens GN=MAP3K5 PE=1 SV=1 - [M3K5_HUMAN]	37.63	1	1	30	59	1374	154.44	5.78271
	1697	Q96DU7	Inositol-trisphosphate 3-kinase C OS=Homo sapiens GN=ITPKC PE=1 SV=1 - [IP3KC_HUMAN]	37.63	1	1	14	27	683	75.1604	5.13525
	1698	P42262-3	Isoform 3 of Glutamate receptor 2 OS=Homo sapiens GN=GRIA2 - [GRIA2_HUMAN]	37.62	1	1	32	71	901	100.53	7.59131
	1699	P06213-2	Isoform Short of Insulin receptor OS=Homo sapiens GN=INSR - [INSR_HUMAN]	37.59	2	1	36	101	1370	155.046	6.20166
	1700	Q14894	Ketimine reductase mu-crystallin OS=Homo sapiens GN=CRYM PE=1 SV=1 - [CRYM_HUMAN]	37.58	1	1	9	23	314	33.7544	5.13525
	1701	Q96C45	Serine/threonine-protein kinase ULK4 OS=Homo sapiens GN=ULK4 PE=1 SV=2 - [ULK4_HUMAN]	37.57	1	1	30	51	1275	142.352	6.29053
	1702	Q9NUP9	Protein lin-7 homolog C OS=Homo sapiens GN=LIN7C PE=1 SV=1 - [LIN7C_HUMAN]	37.56	3	3	6	30	197	21.8205	8.42627
	1703	Q02763	Angiopoietin-1 receptor OS=Homo sapiens GN=TEK PE=1 SV=2 - [TIE2_HUMAN]	37.54	3	1	26	57	1124	125.749	6.88818
	1704	P14314-2	Isoform 2 of Glucosidase 2 subunit beta OS=Homo sapiens GN=PRKCSH - [GLU2B_HUMAN]	37.52	2	4	15	44	525	59.1407	4.42432
	1705	Q6ECI4	Zinc finger protein 470 OS=Homo sapiens GN=ZNF470 PE=2 SV=3 - [ZN470_HUMAN]	37.52	2	1	18	44	717	82.597	8.57275
	1706	Q8TAM1	Bardet-Biedl syndrome 10 protein OS=Homo sapiens GN=BBS10 PE=1 SV=2 - [BBS10_HUMAN]	37.48	1	1	20	43	723	80.7853	7.76709
	1707	O00462	Beta-mannosidase OS=Homo sapiens GN=MANBA PE=1 SV=3 - [MANBA_HUMAN]	37.43	1	2	21	48	879	100.831	5.51611
	1708	P22102	Trifunctional purine biosynthetic protein adenosine-3 OS=Homo sapiens GN=GART PE=1 SV=1 - [PUR2_HUMAN]	37.43	2	4	27	72	1010	107.699	6.69775
	1709	Q9BRA2	Thioredoxin domain-containing protein 17 OS=Homo sapiens GN=TXNDC17 PE=1 SV=1 - [TXD17_HUMAN]	37.4	1	2	4	13	123	13.9318	5.51611
	1710	Q96N22	Zinc finger protein 681 OS=Homo sapiens GN=ZNF681 PE=2 SV=2 - [ZN681_HUMAN]	37.36	2	2	17	45	645	75.0111	9.08545
	1711	Q01668-2	Isoform Beta-cell-type of Voltage-dependent L-type calcium channel subunit alpha-1D OS=Homo sapiens GN=CACNA1D - [CAC1D_HUMAN]	37.32	4	1	62	136	2181	247.407	6.97607
	1712	P14209-3	Isoform 3 of CD99 antigen OS=Homo sapiens GN=CD99 - [CD99_HUMAN]	37.28	2	1	3	17	169	17.1174	4.56396
	1713	Q9H799-5	Isoform 2 of Uncharacterized protein C5orf42 OS=Homo sapiens GN=C5orf42 - [CE042_HUMAN]	37.23	2	1	61	142	2933	331.224	6.56592
	1714	Q7LBR1	Charged multivesicular body protein 1b OS=Homo sapiens GN=CHMP1B PE=1 SV=1 - [CHM1B_HUMAN]	37.19	1	2	9	21	199	22.0952	8.104
	1715	P22626	Heterogeneous nuclear ribonucleoproteins A2/B1 OS=Homo sapiens GN=HNRNPA2B1 PE=1 SV=2 - [ROA2_HUMAN]	37.11	2	2	10	24	353	37.4067	8.95361
	1716	Q6V0I7-3	Isoform 3 of Protocadherin Fat 4 OS=Homo sapiens GN=FAT4 - [FAT4_HUMAN]	37.09	3	1	111	232	4980	542.28	4.94482
	1717	Q14108	Lysosome membrane protein 2 OS=Homo sapiens GN=SCARB2 PE=1 SV=2 - [SCRB2_HUMAN]	37.03	2	2	13	34	478	54.2555	5.13525
	1718	Q9NVE4	Coiled-coil domain-containing protein 87 OS=Homo sapiens GN=CCDC87 PE=2 SV=2 - [CCD87_HUMAN]	36.98	1	1	25	165	849	96.3416	8.5874
	1719	Q6YHK3	CD109 antigen OS=Homo sapiens GN=CD109 PE=1 SV=2 - [CD109_HUMAN]	36.96	4	7	39	90	1445	161.587	5.84619
	1720	Q8N9W4	Golgin subfamily A member 6-like protein 2 OS=Homo sapiens GN=GOLGA6L2 PE=2 SV=2 - [GG6L2_HUMAN]	36.92	2	1	23	70	650	79.2929	5.5415
	1721	A1A4V9	Coiled-coil domain-containing protein C16orf93 OS=Homo sapiens GN=C16orf93 PE=2 SV=1 - [CP093_HUMAN]	36.86	2	1	10	30	331	37.8974	6.7417
	1722	P21926	CD9 antigen OS=Homo sapiens GN=CD9 PE=1 SV=4 - [CD9_HUMAN]	36.84	1	3	7	62	228	25.399	7.15186
	1723	Q9BXS4	Transmembrane protein 59 OS=Homo sapiens GN=TMEM59 PE=1 SV=1 - [TMM59_HUMAN]	36.84	1	1	10	33	323	36.1997	5.09717
	1724	Q95604	HLA class I histocompatibility antigen, Cw-17 alpha chain OS=Homo sapiens GN=HLA-C PE=1 SV=1 - [1C17_HUMAN]	36.83	2	1	12	115	372	41.2126	6.80029
	1725	P23515	Oligodendrocyte-myelin glycoprotein OS=Homo sapiens GN=OMG PE=1 SV=2 - [OMGP_HUMAN]	36.82	1	1	10	36	440	49.5762	7.94287
	1726	P53985	Monocarboxylate transporter 1 OS=Homo sapiens GN=SLC16A1 PE=1 SV=3 - [MOT1_HUMAN]	36.8	1	3	12	63	500	53.9089	8.66064
	1727	Q149N8-4	Isoform 3 of E3 ubiquitin-protein ligase SHPRH OS=Homo sapiens GN=SHPRH - [SHPRH_HUMAN]	36.77	3	1	46	114	1659	190.375	7.62061
	1728	P61353	60S ribosomal protein L27 OS=Homo sapiens GN=RPL27 PE=1 SV=2 - [RL27_HUMAN]	36.76	1	2	5	7	136	15.7877	10.5649
	1729	Q96QP1	Alpha-protein kinase 1 OS=Homo sapiens GN=ALPK1 PE=2 SV=3 - [ALPK1_HUMAN]	36.74	2	1	31	63	1244	138.774	6.23975
	1730	Q5TDP6	Lengsin OS=Homo sapiens GN=LGSN PE=1 SV=1 - [LGSN_HUMAN]	36.74	3	1	17	49	509	57.2414	6.354
	1731	P49757-3	Isoform 3 of Protein numb homolog OS=Homo sapiens GN=NUMB - [NUMB_HUMAN]	36.72	7	1	24	57	640	69.3876	8.20654
	1732	O14818	Proteasome subunit alpha type-7 OS=Homo sapiens GN=PSMA7 PE=1 SV=1 - [PSA7_HUMAN]	36.69	5	2	7	19	248	27.8696	8.45557
	1733	Q9HCE6	Rho guanine nucleotide exchange factor 10-like protein OS=Homo sapiens GN=ARHGEF10L PE=1 SV=3 - [ARGAL_HUMAN]	36.67	4	1	26	70	1279	140.321	5.88428
	1734	Q86SP6	Probable G-protein coupled receptor 149 OS=Homo sapiens GN=GPR149 PE=2 SV=2 - [GP149_HUMAN]	36.66	1	1	19	55	731	80.9325	6.97607
	1735	Q92547	DNA topoisomerase 2-binding protein 1 OS=Homo sapiens GN=TOPBP1 PE=1 SV=3 - [TOPB1_HUMAN]	36.66	1	1	37	88	1522	170.571	6.96143
	1736	Q9C0G0	Zinc finger protein 407 OS=Homo sapiens GN=ZNF407 PE=1 SV=2 - [ZN407_HUMAN]	36.65	3	1	58	133	2248	247.211	6.49365
	1737	Q969X6-3	Isoform 3 of Cirhin OS=Homo sapiens GN=CIRH1A - [CIR1A_HUMAN]	36.64	3	1	13	38	625	69.5943	8.5874
	1738	Q96E52	Metalloendopeptidase OMA1, mitochondrial OS=Homo sapiens GN=OMA1 PE=1 SV=1 - [OMA1_HUMAN]	36.64	2	1	13	21	524	60.0814	9.24658
	1739	P62633-5	Isoform 5 of Cellular nucleic acid-binding protein OS=Homo sapiens GN=CNBP - [CNBP_HUMAN]	36.63	6	1	5	7	172	18.9574	7.57666
	1740	A6NCI4	von Willebrand factor A domain-containing protein 3A OS=Homo sapiens GN=VWA3A PE=2 SV=3 - [VWA3A_HUMAN]	36.57	4	3	36	85	1184	133.935	8.45557
	1741	Q3L8U1-2	Isoform 2 of Chromodomain-helicase-DNA-binding protein 9 OS=Homo sapiens GN=CHD9 - [CHD9_HUMAN]	36.55	3	1	74	142	2881	323.854	6.91748
	1742	Q9BZQ8	Protein Niban OS=Homo sapiens GN=FAM129A PE=1 SV=1 - [NIBAN_HUMAN]	36.53	1	6	24	88	928	103.07	4.77979
	1743	Q5ZPR3	CD276 antigen OS=Homo sapiens GN=CD276 PE=1 SV=1 - [CD276_HUMAN]	36.52	4	5	12	57	534	57.1995	4.90674
	1744	A1L170-2	Isoform 2 of Uncharacterized protein C1orf226 OS=Homo sapiens GN=C1orf226 - [CA226_HUMAN]	36.51	2	1	10	28	315	33.6711	5.68115
	1745	Q9BY43	Charged multivesicular body protein 4a OS=Homo sapiens GN=CHMP4A PE=1 SV=3 - [CHM4A_HUMAN]	36.49	1	1	7	12	222	25.0828	4.70361
	1746	P46776	60S ribosomal protein L27a OS=Homo sapiens GN=RPL27A PE=1 SV=2 - [RL27A_HUMAN]	36.49	1	1	5	16	148	16.551	11.0044
	1747	Q14978	Nucleolar and coiled-body phosphoprotein 1 OS=Homo sapiens GN=NOLC1 PE=1 SV=2 - [NOLC1_HUMAN]	36.48	3	1	19	48	699	73.5596	9.46631
	1748	Q8NE09	Regulator of G-protein signaling 22 OS=Homo sapiens GN=RGS22 PE=2 SV=3 - [RGS22_HUMAN]	36.47	2	1	29	65	1264	147.07	7.89893
	1749	Q8TE60	A disintegrin and metalloproteinase with thrombospondin motifs 18 OS=Homo sapiens GN=ADAMTS18 PE=1 SV=3 - [ATS18_HUMAN]	36.45	2	1	26	55	1221	135.079	8.54346
	1750	Q9BY12-2	Isoform 2 of S phase cyclin A-associated protein in the endoplasmic reticulum OS=Homo sapiens GN=SCAPER - [SCAPE_HUMAN]	36.44	3	1	33	72	1265	142.61	7.60596
	1751	Q17R89	Rho GTPase-activating protein 44 OS=Homo sapiens GN=ARHGAP44 PE=1 SV=1 - [RHG44_HUMAN]	36.43	1	1	22	70	818	89.1903	6.55127
	1752	O14771	Zinc finger protein 213 OS=Homo sapiens GN=ZNF213 PE=2 SV=2 - [ZN213_HUMAN]	36.38	1	1	12	31	459	51.2312	6.94678
	1753	Q14966-3	Isoform 3 of Zinc finger protein 638 OS=Homo sapiens GN=ZNF638 - [ZN638_HUMAN]	36.38	3	1	54	135	1957	218.111	6.41748
	1754	O43826	Glucose-6-phosphate translocase OS=Homo sapiens GN=SLC37A4 PE=1 SV=1 - [G6PT1_HUMAN]	36.36	2	1	10	29	429	46.3298	8.6167
	1755	O94804	Serine/threonine-protein kinase 10 OS=Homo sapiens GN=STK10 PE=1 SV=1 - [STK10_HUMAN]	36.36	1	4	30	69	968	112.065	6.94678
	1756	P24539	ATP synthase F(0) complex subunit B1, mitochondrial OS=Homo sapiens GN=ATP5F1 PE=1 SV=2 - [AT5F1_HUMAN]	36.33	1	1	8	13	256	28.8903	9.36377
	1757	O94979-9	Isoform 9 of Protein transport protein Sec31A OS=Homo sapiens GN=SEC31A - [SC31A_HUMAN]	36.25	9	2	26	65	1200	130.665	6.81494
	1758	Q96DR7	Rho guanine nucleotide exchange factor 26 OS=Homo sapiens GN=ARHGEF26 PE=1 SV=4 - [ARHGQ_HUMAN]	36.17	2	1	23	62	871	97.2851	8.95361
	1759	P52948-5	Isoform 5 of Nuclear pore complex protein Nup98-Nup96 OS=Homo sapiens GN=NUP98 - [NUP98_HUMAN]	36.17	6	1	45	100	1800	195.696	6.3667
	1760	P53804	E3 ubiquitin-protein ligase TTC3 OS=Homo sapiens GN=TTC3 PE=1 SV=2 - [TTC3_HUMAN]	36.15	3	1	57	138	2025	229.724	7.51807
	1761	Q99961	Endophilin-A2 OS=Homo sapiens GN=SH3GL1 PE=1 SV=1 - [SH3G1_HUMAN]	36.14	4	5	12	38	368	41.464	5.42725
	1762	O94966-6	Isoform 6 of Ubiquitin carboxyl-terminal hydrolase 19 OS=Homo sapiens GN=USP19 - [UBP19_HUMAN]	36.13	7	1	30	45	1384	151.83	6.41748
	1763	Q9NRD9	Dual oxidase 1 OS=Homo sapiens GN=DUOX1 PE=1 SV=1 - [DUOX1_HUMAN]	36.11	3	1	42	112	1551	177.123	7.89893
	1764	Q53TS8-4	Isoform 4 of Amyotrophic lateral sclerosis 2 chromosomal region candidate gene 11 protein OS=Homo sapiens GN=ALS2CR11 - [AL2SA_HUMAN]	36.1	2	2	47	113	1820	208.926	7.62061
	1765	Q2M329	Coiled-coil domain-containing protein 96 OS=Homo sapiens GN=CCDC96 PE=2 SV=2 - [CCD96_HUMAN]	36.04	1	1	18	69	555	62.6726	4.94482
	1766	P17813	Endoglin OS=Homo sapiens GN=ENG PE=1 SV=2 - [EGLN_HUMAN]	36.02	2	3	16	26	658	70.5331	6.60986
	1767	O75626-2	Isoform 2 of PR domain zinc finger protein 1 OS=Homo sapiens GN=PRDM1 - [PRDM1_HUMAN]	35.99	3	1	18	37	789	87.935	8.42627
	1768	P24928	DNA-directed RNA polymerase II subunit RPB1 OS=Homo sapiens GN=POLR2A PE=1 SV=2 - [RPB1_HUMAN]	35.94	1	1	50	147	1970	217.039	7.37158
	1769	Q5SWA1	Protein phosphatase 1 regulatory subunit 15B OS=Homo sapiens GN=PPP1R15B PE=1 SV=1 - [PR15B_HUMAN]	35.9	1	1	15	23	713	79.1023	4.69092
	1770	Q9Y6R6	Zinc finger protein 780B OS=Homo sapiens GN=ZNF780B PE=2 SV=1 - [Z780B_HUMAN]	35.89	1	1	23	33	833	96.7441	8.92432
	1771	Q9H0X4	Protein ITFG3 OS=Homo sapiens GN=ITFG3 PE=1 SV=1 - [ITFG3_HUMAN]	35.87	1	1	12	31	552	59.6221	6.27783
	1772	Q9UKD1	Glucocorticoid modulatory element-binding protein 2 OS=Homo sapiens GN=GMEB2 PE=1 SV=1 - [GMEB2_HUMAN]	35.85	1	1	12	25	530	56.3858	5.60498
	1773	Q96KV6	Putative butyrophilin subfamily 2 member A3 OS=Homo sapiens GN=BTN2A3P PE=5 SV=2 - [BT2A3_HUMAN]	35.84	1	1	16	62	586	65.6709	5.74463
	1774	Q9NU02	Ankyrin repeat and EF-hand domain-containing protein 1 OS=Homo sapiens GN=ANKEF1 PE=2 SV=2 - [ANKE1_HUMAN]	35.82	1	1	22	67	776	86.6097	8.27979
	1775	P20333-2	Isoform 2 of Tumor necrosis factor receptor superfamily member 1B OS=Homo sapiens GN=TNFRSF1B - [TNR1B_HUMAN]	35.82	1	1	6	13	268	28.4423	7.10791
	1776	Q9ULG6-5	Isoform 5 of Cell cycle progression protein 1 OS=Homo sapiens GN=CCPG1 - [CCPG1_HUMAN]	35.81	5	1	22	36	807	93.4303	6.34131
	1777	Q02543	60S ribosomal protein L18a OS=Homo sapiens GN=RPL18A PE=1 SV=2 - [RL18A_HUMAN]	35.8	1	6	8	37	176	20.7489	10.7114
	1778	O15431	High affinity copper uptake protein 1 OS=Homo sapiens GN=SLC31A1 PE=1 SV=1 - [COPT1_HUMAN]	35.79	1	1	4	10	190	21.0763	7.41553
	1779	Q9Y6R1-4	Isoform 4 of Electrogenic sodium bicarbonate cotransporter 1 OS=Homo sapiens GN=SLC4A4 - [S4A4_HUMAN]	35.78	4	1	24	75	995	112.2	6.75635
	1780	P19338	Nucleolin OS=Homo sapiens GN=NCL PE=1 SV=3 - [NUCL_HUMAN]	35.77	1	13	30	145	710	76.5684	4.70361
	1781	Q00839	Heterogeneous nuclear ribonucleoprotein U OS=Homo sapiens GN=HNRNPU PE=1 SV=6 - [HNRPU_HUMAN]	35.76	2	2	21	56	825	90.528	5.99854
	1782	Q7Z7M9	Polypeptide N-acetylgalactosaminyltransferase 5 OS=Homo sapiens GN=GALNT5 PE=1 SV=1 - [GALT5_HUMAN]	35.74	1	1	25	65	940	106.199	9.46631
	1783	Q05682	Caldesmon OS=Homo sapiens GN=CALD1 PE=1 SV=3 - [CALD1_HUMAN]	35.69	6	1	25	54	793	93.1754	5.65576
	1784	P62266	40S ribosomal protein S23 OS=Homo sapiens GN=RPS23 PE=1 SV=3 - [RS23_HUMAN]	35.66	1	2	3	35	143	15.7977	10.4917
	1785	P13473	Lysosome-associated membrane glycoprotein 2 OS=Homo sapiens GN=LAMP2 PE=1 SV=2 - [LAMP2_HUMAN]	35.61	3	2	9	17	410	44.9323	5.63037
	1786	Q9BR76	Coronin-1B OS=Homo sapiens GN=CORO1B PE=1 SV=1 - [COR1B_HUMAN]	35.58	1	1	13	24	489	54.2003	5.88428
	1787	Q5SZK8	FRAS1-related extracellular matrix protein 2 OS=Homo sapiens GN=FREM2 PE=1 SV=2 - [FREM2_HUMAN]	35.53	2	1	71	152	3169	350.937	5.03369
	1788	Q969X5	Endoplasmic reticulum-Golgi intermediate compartment protein 1 OS=Homo sapiens GN=ERGIC1 PE=1 SV=1 - [ERGI1_HUMAN]	35.52	2	1	8	36	290	32.5715	7.06396
	1789	Q8NGD1	Olfactory receptor 4N2 OS=Homo sapiens GN=OR4N2 PE=2 SV=1 - [OR4N2_HUMAN]	35.5	1	1	5	11	307	34.6976	8.79248
	1790	Q8NHU2	Uncharacterized protein C20orf26 OS=Homo sapiens GN=C20orf26 PE=2 SV=3 - [CT026_HUMAN]	35.49	4	1	31	56	1237	141.258	6.16357
	1791	Q9H9G7	Protein argonaute-3 OS=Homo sapiens GN=AGO3 PE=1 SV=2 - [AGO3_HUMAN]	35.47	1	1	22	48	860	97.298	9.11475
	1792	O15085-2	Isoform 2 of Rho guanine nucleotide exchange factor 11 OS=Homo sapiens GN=ARHGEF11 - [ARHGB_HUMAN]	35.47	2	2	43	99	1562	172.137	5.5415
	1793	Q13797	Integrin alpha-9 OS=Homo sapiens GN=ITGA9 PE=1 SV=2 - [ITA9_HUMAN]	35.46	1	1	26	70	1035	114.415	6.13818
	1794	Q9Y4H2	Insulin receptor substrate 2 OS=Homo sapiens GN=IRS2 PE=1 SV=2 - [IRS2_HUMAN]	35.43	1	1	32	72	1338	137.249	8.646
	1795	O43309	Zinc finger and SCAN domain-containing protein 12 OS=Homo sapiens GN=ZSCAN12 PE=2 SV=1 - [ZSC12_HUMAN]	35.43	1	1	16	35	604	70.1778	6.7417
	1796	Q6ZU65	Ubinuclein-2 OS=Homo sapiens GN=UBN2 PE=1 SV=2 - [UBN2_HUMAN]	35.41	1	1	31	58	1347	145.998	9.18799
	1797	Q8WU17	E3 ubiquitin-protein ligase RNF139 OS=Homo sapiens GN=RNF139 PE=1 SV=1 - [RN139_HUMAN]	35.39	1	1	12	118	664	75.9439	6.44287
	1798	Q99829	Copine-1 OS=Homo sapiens GN=CPNE1 PE=1 SV=1 - [CPNE1_HUMAN]	35.38	1	5	11	58	537	59.0215	5.8335
	1799	Q13347	Eukaryotic translation initiation factor 3 subunit I OS=Homo sapiens GN=EIF3I PE=1 SV=1 - [EIF3I_HUMAN]	35.38	1	1	10	15	325	36.4786	5.64307
	1800	Q13433	Zinc transporter ZIP6 OS=Homo sapiens GN=SLC39A6 PE=1 SV=3 - [S39A6_HUMAN]	35.36	1	1	13	23	755	84.9933	6.94678
	1801	Q96FZ7	Charged multivesicular body protein 6 OS=Homo sapiens GN=CHMP6 PE=1 SV=3 - [CHMP6_HUMAN]	35.32	1	1	6	12	201	23.4703	5.31299
	1802	Q5U651	Ras-interacting protein 1 OS=Homo sapiens GN=RASIP1 PE=1 SV=1 - [RAIN_HUMAN]	35.31	1	1	23	43	963	103.393	7.95752
	1803	Q9GZV4	Eukaryotic translation initiation factor 5A-2 OS=Homo sapiens GN=EIF5A2 PE=1 SV=3 - [IF5A2_HUMAN]	35.29	2	1	5	31	153	16.7822	5.57959
	1804	O95453-2	Isoform 2 of Poly(A)-specific ribonuclease PARN OS=Homo sapiens GN=PARN - [PARN_HUMAN]	35.29	1	1	16	30	578	66.5324	6.37939
	1805	P08F94	Fibrocystin OS=Homo sapiens GN=PKHD1 PE=1 SV=1 - [PKHD1_HUMAN]	35.27	2	1	92	225	4074	446.418	6.56592
	1806	Q8N398-2	Isoform 2 of von Willebrand factor A domain-containing protein 5B2 OS=Homo sapiens GN=VWA5B2 - [VW5B2_HUMAN]	35.27	2	1	26	51	1242	131.585	6.45557
	1807	Q5T749	Keratinocyte proline-rich protein OS=Homo sapiens GN=KPRP PE=1 SV=1 - [KPRP_HUMAN]	35.23	1	1	13	25	579	64.0932	8.26514
	1808	Q9BYZ6	Rho-related BTB domain-containing protein 2 OS=Homo sapiens GN=RHOBTB2 PE=2 SV=2 - [RHBT2_HUMAN]	35.21	2	1	23	62	727	82.5734	6.7417
	1809	Q6ZS11	Ras and Rab interactor-like protein OS=Homo sapiens GN=RINL PE=2 SV=2 - [RINL_HUMAN]	35.16	2	1	13	51	566	62.4282	5.92236
	1810	Q15758	Neutral amino acid transporter B(0) OS=Homo sapiens GN=SLC1A5 PE=1 SV=2 - [AAAT_HUMAN]	35.12	3	6	12	109	541	56.5623	5.47803
	1811	Q9NRR5	Ubiquilin-4 OS=Homo sapiens GN=UBQLN4 PE=1 SV=2 - [UBQL4_HUMAN]	35.11	1	1	16	72	601	63.8124	5.22412
	1812	Q15003	Condensin complex subunit 2 OS=Homo sapiens GN=NCAPH PE=1 SV=3 - [CND2_HUMAN]	35.09	1	1	17	39	741	82.5113	5.05908
	1813	P15529-9	Isoform N of Membrane cofactor protein OS=Homo sapiens GN=CD46 - [MCP_HUMAN]	34.96	16	1	10	15	349	39.2992	5.2749
	1814	Q9UJK0	Ribosome biogenesis protein TSR3 homolog OS=Homo sapiens GN=TSR3 PE=1 SV=1 - [TSR3_HUMAN]	34.94	1	1	7	25	312	33.5748	6.87354
	1815	Q9BXU7	Ubiquitin carboxyl-terminal hydrolase 26 OS=Homo sapiens GN=USP26 PE=1 SV=1 - [UBP26_HUMAN]	34.94	1	1	23	34	913	103.981	8.70459
	1816	Q3SY52	Zinc finger protein interacting with ribonucleoprotein K OS=Homo sapiens GN=ZIK1 PE=2 SV=1 - [ZIK1_HUMAN]	34.91	3	1	12	25	487	54.7507	8.79248
	1817	Q8NH93	Olfactory receptor 1L3 OS=Homo sapiens GN=OR1L3 PE=2 SV=1 - [OR1L3_HUMAN]	34.88	1	1	7	18	324	36.6083	9.20264
	1818	Q8IYS8	Putative biorientation of chromosomes in cell division protein 1-like 2 OS=Homo sapiens GN=BOD1L2 PE=5 SV=2 - [BD1L2_HUMAN]	34.88	1	1	5	7	172	18.064	5.32568
	1819	Q6ZQQ6-2	Isoform 2 of WD repeat-containing protein 87 OS=Homo sapiens GN=WDR87 - [WDR87_HUMAN]	34.86	2	1	74	180	2912	337.564	7.28369
	1820	O43765	Small glutamine-rich tetratricopeptide repeat-containing protein alpha OS=Homo sapiens GN=SGTA PE=1 SV=1 - [SGTA_HUMAN]	34.82	1	1	10	40	313	34.0417	4.86865
	1821	Q9UIG0-2	Isoform 2 of Tyrosine-protein kinase BAZ1B OS=Homo sapiens GN=BAZ1B - [BAZ1B_HUMAN]	34.75	2	2	42	109	1479	170.34	8.48486
	1822	A4FU69	EF-hand calcium-binding domain-containing protein 5 OS=Homo sapiens GN=EFCAB5 PE=1 SV=3 - [EFCB5_HUMAN]	34.73	2	1	42	94	1503	173.295	5.8208
	1823	O43657	Tetraspanin-6 OS=Homo sapiens GN=TSPAN6 PE=1 SV=1 - [TSN6_HUMAN]	34.69	1	3	10	39	245	27.5451	8.104
	1824	P19256-3	Isoform 3 of Lymphocyte function-associated antigen 3 OS=Homo sapiens GN=CD58 - [LFA3_HUMAN]	34.68	3	1	5	12	248	27.9419	7.02002
	1825	Q92820	Gamma-glutamyl hydrolase OS=Homo sapiens GN=GGH PE=1 SV=2 - [GGH_HUMAN]	34.59	1	2	9	15	318	35.9412	7.10791
	1826	B0I1T2	Unconventional myosin-Ig OS=Homo sapiens GN=MYO1G PE=1 SV=2 - [MYO1G_HUMAN]	34.58	1	1	23	38	1018	116.369	8.73389
	1827	Q9UBN4-6	Isoform Zeta of Short transient receptor potential channel 4 OS=Homo sapiens GN=TRPC4 - [TRPC4_HUMAN]	34.58	1	1	21	51	804	92.1629	8.38232
	1828	P61296	Heart- and neural crest derivatives-expressed protein 2 OS=Homo sapiens GN=HAND2 PE=1 SV=1 - [HAND2_HUMAN]	34.56	1	1	4	6	217	23.651	9.17334
	1829	Q14207	Protein NPAT OS=Homo sapiens GN=NPAT PE=1 SV=3 - [NPAT_HUMAN]	34.48	1	1	29	46	1427	154.195	5.88428
	1830	Q96GX1-2	Isoform 2 of Tectonic-2 OS=Homo sapiens GN=TCTN2 - [TECT2_HUMAN]	34.48	2	1	15	56	696	76.6933	5.18604
	1831	O14817	Tetraspanin-4 OS=Homo sapiens GN=TSPAN4 PE=1 SV=1 - [TSN4_HUMAN]	34.45	1	5	7	35	238	26.1002	6.46826
	1832	Q9H0T7	Ras-related protein Rab-17 OS=Homo sapiens GN=RAB17 PE=1 SV=2 - [RAB17_HUMAN]	34.43	1	1	6	13	212	23.4761	7.84033
	1833	Q99816	Tumor susceptibility gene 101 protein OS=Homo sapiens GN=TSG101 PE=1 SV=2 - [TS101_HUMAN]	34.36	2	4	11	29	390	43.9165	6.45557
	1834	Q9Y5F1	Protocadherin beta-12 OS=Homo sapiens GN=PCDHB12 PE=2 SV=1 - [PCDBC_HUMAN]	34.34	1	1	16	70	795	86.7161	4.84326
	1835	Q8IYW5	E3 ubiquitin-protein ligase RNF168 OS=Homo sapiens GN=RNF168 PE=1 SV=1 - [RN168_HUMAN]	34.33	1	1	16	30	571	64.9793	7.95752
	1836	Q9NZM3	Intersectin-2 OS=Homo sapiens GN=ITSN2 PE=1 SV=3 - [ITSN2_HUMAN]	34.3	2	1	43	119	1697	193.34	8.11865
	1837	Q49AM1	mTERF domain-containing protein 3, mitochondrial OS=Homo sapiens GN=MTERFD3 PE=1 SV=2 - [MTER3_HUMAN]	34.29	1	1	10	30	385	44.3856	8.96826
	1838	Q9NY35-2	Isoform 2 of Claudin domain-containing protein 1 OS=Homo sapiens GN=CLDND1 - [CLDN1_HUMAN]	34.24	2	1	5	9	184	21.0383	5.13525
	1839	O14880	Microsomal glutathione S-transferase 3 OS=Homo sapiens GN=MGST3 PE=1 SV=1 - [MGST3_HUMAN]	34.21	1	1	3	5	152	16.5056	9.37842
	1840	Q52M93	Zinc finger protein 585B OS=Homo sapiens GN=ZNF585B PE=2 SV=1 - [Z585B_HUMAN]	34.2	1	1	19	32	769	88.0095	9.0415
	1841	Q8WUM9	Sodium-dependent phosphate transporter 1 OS=Homo sapiens GN=SLC20A1 PE=1 SV=1 - [S20A1_HUMAN]	34.17	1	2	18	30	679	73.652	7.07861
	1842	Q6IA17	Single Ig IL-1-related receptor OS=Homo sapiens GN=SIGIRR PE=1 SV=3 - [SIGIR_HUMAN]	34.15	2	1	10	25	410	45.6505	6.45557
	1843	O95236	Apolipoprotein L3 OS=Homo sapiens GN=APOL3 PE=2 SV=3 - [APOL3_HUMAN]	34.08	2	1	12	24	402	44.2507	8.1626
	1844	Q8TDB8	Solute carrier family 2, facilitated glucose transporter member 14 OS=Homo sapiens GN=SLC2A14 PE=2 SV=1 - [GTR14_HUMAN]	34.04	4	2	13	48	520	56.2835	7.82568
	1845	P43366	Melanoma-associated antigen B1 OS=Homo sapiens GN=MAGEB1 PE=1 SV=2 - [MAGB1_HUMAN]	34.01	1	1	9	50	347	39.0126	8.44092
	1846	P47914	60S ribosomal protein L29 OS=Homo sapiens GN=RPL29 PE=1 SV=2 - [RL29_HUMAN]	33.96	1	1	8	27	159	17.7411	11.6636
	1847	Q12884	Seprase OS=Homo sapiens GN=FAP PE=1 SV=5 - [SEPR_HUMAN]	33.95	1	1	17	41	760	87.6567	6.65381
	1848	P16402	Histone H1.3 OS=Homo sapiens GN=HIST1H1D PE=1 SV=2 - [H13_HUMAN]	33.94	5	4	9	108	221	22.3363	11.019
	1849	P20042	Eukaryotic translation initiation factor 2 subunit 2 OS=Homo sapiens GN=EIF2S2 PE=1 SV=2 - [IF2B_HUMAN]	33.93	1	1	9	19	333	38.3644	5.79541
	1850	Q8N8M0	Putative N-acetyltransferase 16 OS=Homo sapiens GN=NAT16 PE=2 SV=2 - [NAT16_HUMAN]	33.88	1	1	6	8	369	40.4963	6.93213
	1851	P84022	Mothers against decapentaplegic homolog 3 OS=Homo sapiens GN=SMAD3 PE=1 SV=1 - [SMAD3_HUMAN]	33.88	10	2	9	21	425	48.0498	7.15186
	1852	Q04721	Neurogenic locus notch homolog protein 2 OS=Homo sapiens GN=NOTCH2 PE=1 SV=3 - [NOTC2_HUMAN]	33.75	1	6	49	166	2471	265.226	5.13525
	1853	Q13158	Protein FADD OS=Homo sapiens GN=FADD PE=1 SV=1 - [FADD_HUMAN]	33.65	1	1	4	16	208	23.2648	5.69385
	1854	Q3YBR2	Transforming growth factor beta regulator 1 OS=Homo sapiens GN=TBRG1 PE=1 SV=1 - [TBRG1_HUMAN]	33.58	3	1	9	25	411	44.9171	8.48486
	1855	P07339	Cathepsin D OS=Homo sapiens GN=CTSD PE=1 SV=1 - [CATD_HUMAN]	33.5	1	1	10	38	412	44.5236	6.53662
	1856	O15121	Sphingolipid delta(4)-desaturase DES1 OS=Homo sapiens GN=DEGS1 PE=1 SV=1 - [DEGS1_HUMAN]	33.44	1	1	7	9	323	37.8412	7.45947
	1857	Q68CQ7	Glycosyltransferase 8 domain-containing protein 1 OS=Homo sapiens GN=GLT8D1 PE=1 SV=2 - [GL8D1_HUMAN]	33.42	2	1	9	13	371	41.909	9.34912
	1858	Q8IWX8	Calcium homeostasis endoplasmic reticulum protein OS=Homo sapiens GN=CHERP PE=1 SV=3 - [CHERP_HUMAN]	33.41	1	1	27	70	916	103.637	9.0415
	1859	Q15942	Zyxin OS=Homo sapiens GN=ZYX PE=1 SV=1 - [ZYX_HUMAN]	33.39	1	2	10	24	572	61.2382	6.66846
	1860	O43633	Charged multivesicular body protein 2a OS=Homo sapiens GN=CHMP2A PE=1 SV=1 - [CHM2A_HUMAN]	33.33	1	2	8	32	222	25.0879	5.97314
	1861	P06703	Protein S100-A6 OS=Homo sapiens GN=S100A6 PE=1 SV=1 - [S10A6_HUMAN]	33.33	1	2	4	28	90	10.1733	5.47803
	1862	Q9UPM8	AP-4 complex subunit epsilon-1 OS=Homo sapiens GN=AP4E1 PE=1 SV=2 - [AP4E1_HUMAN]	33.25	2	1	22	43	1137	127.206	5.98584
	1863	P53990	IST1 homolog OS=Homo sapiens GN=IST1 PE=1 SV=1 - [IST1_HUMAN]	33.24	5	2	9	33	364	39.7255	5.35107
	1864	Q13129	Zinc finger protein Rlf OS=Homo sapiens GN=RLF PE=1 SV=2 - [RLF_HUMAN]	33.23	1	1	48	93	1914	217.813	6.771
	1865	P55286	Cadherin-8 OS=Homo sapiens GN=CDH8 PE=1 SV=2 - [CADH8_HUMAN]	33.17	1	1	17	26	799	88.1985	4.70361
	1866	Q04637-5	Isoform D of Eukaryotic translation initiation factor 4 gamma 1 OS=Homo sapiens GN=EIF4G1 - [IF4G1_HUMAN]	33.17	8	1	38	81	1435	158.419	5.21143
	1867	Q6ZTN6-3	Isoform 3 of Ankyrin repeat domain-containing protein 13D OS=Homo sapiens GN=ANKRD13D - [AN13D_HUMAN]	33.06	1	1	12	59	605	68.1295	5.59229
	1868	Q8NGZ9	Olfactory receptor 2T10 OS=Homo sapiens GN=OR2T10 PE=2 SV=1 - [O2T10_HUMAN]	33.01	1	1	6	17	312	35.3791	8.48486
	1869	P82279-3	Isoform 3 of Protein crumbs homolog 1 OS=Homo sapiens GN=CRB1 - [CRUM1_HUMAN]	33	5	1	23	38	1294	141.994	5.10986
	1870	O14686-3	Isoform 3 of Histone-lysine N-methyltransferase 2D OS=Homo sapiens GN=KMT2D - [KMT2D_HUMAN]	33	2	1	118	263	5540	593.304	5.57959
	1871	Q9Y6Y1-2	Isoform 2 of Calmodulin-binding transcription activator 1 OS=Homo sapiens GN=CAMTA1 - [CMTA1_HUMAN]	32.97	2	1	32	79	1659	182.142	7.48877
	1872	O95758-4	Isoform 4 of Polypyrimidine tract-binding protein 3 OS=Homo sapiens GN=PTBP3 - [PTBP3_HUMAN]	32.97	7	1	13	43	558	60.3794	9.18799
	1873	P78563-2	Isoform 2 of Double-stranded RNA-specific editase 1 OS=Homo sapiens GN=ADARB1 - [RED1_HUMAN]	32.95	2	1	12	27	701	76.5854	9.01221
	1874	Q2NL68	Uncharacterized protein C19orf55 OS=Homo sapiens GN=C19orf55 PE=2 SV=1 - [CS055_HUMAN]	32.92	4	1	8	46	480	51.0439	7.13721
	1875	P61221	ATP-binding cassette sub-family E member 1 OS=Homo sapiens GN=ABCE1 PE=1 SV=1 - [ABCE1_HUMAN]	32.89	1	1	16	27	599	67.271	8.33838
	1876	Q12797	Aspartyl/asparaginyl beta-hydroxylase OS=Homo sapiens GN=ASPH PE=1 SV=3 - [ASPH_HUMAN]	32.85	10	2	16	49	758	85.8095	5.0083
	1877	Q8NHA4	Olfactory receptor 2AE1 OS=Homo sapiens GN=OR2AE1 PE=2 SV=1 - [O2AE1_HUMAN]	32.82	1	1	6	23	323	36.5631	9.05615
	1878	Q01105	Protein SET OS=Homo sapiens GN=SET PE=1 SV=3 - [SET_HUMAN]	32.76	4	3	7	72	290	33.4687	4.32275
	1879	Q6UVK1	Chondroitin sulfate proteoglycan 4 OS=Homo sapiens GN=CSPG4 PE=1 SV=2 - [CSPG4_HUMAN]	32.69	1	12	56	141	2322	250.382	5.46533
	1880	P46777	60S ribosomal protein L5 OS=Homo sapiens GN=RPL5 PE=1 SV=3 - [RL5_HUMAN]	32.66	1	2	8	43	297	34.3407	9.71533
	1881	P27105	Erythrocyte band 7 integral membrane protein OS=Homo sapiens GN=STOM PE=1 SV=3 - [STOM_HUMAN]	32.64	3	3	10	42	288	31.7107	7.88428
	1882	Q6PJE2	POM121 and ZP3 fusion protein OS=Homo sapiens GN=POMZP3 PE=2 SV=4 - [POZP3_HUMAN]	32.62	1	1	2	17	187	20.6072	7.18115
	1883	Q16512	Serine/threonine-protein kinase N1 OS=Homo sapiens GN=PKN1 PE=1 SV=2 - [PKN1_HUMAN]	32.59	2	1	18	57	942	103.868	6.3667
	1884	Q13530	Serine incorporator 3 OS=Homo sapiens GN=SERINC3 PE=2 SV=2 - [SERC3_HUMAN]	32.56	1	1	9	27	473	52.5457	7.45947
	1885	O94763	Unconventional prefoldin RPB5 interactor 1 OS=Homo sapiens GN=URI1 PE=1 SV=3 - [RMP_HUMAN]	32.52	4	1	15	39	535	59.7956	5.04639
	1886	P33076	MHC class II transactivator OS=Homo sapiens GN=CIITA PE=1 SV=3 - [C2TA_HUMAN]	32.48	1	1	25	52	1130	123.436	5.46533
	1887	Q6AI14	Sodium/hydrogen exchanger 4 OS=Homo sapiens GN=SLC9A4 PE=1 SV=2 - [SL9A4_HUMAN]	32.46	1	1	20	36	798	89.7566	8.54346
	1888	Q16629-4	Isoform 4 of Serine/arginine-rich splicing factor 7 OS=Homo sapiens GN=SRSF7 - [SRSF7_HUMAN]	32.3	4	1	8	19	226	25.9963	11.7661
	1889	Q401N2	Zinc-activated ligand-gated ion channel OS=Homo sapiens GN=ZACN PE=1 SV=2 - [ZACN_HUMAN]	32.28	2	1	10	13	412	45.7872	8.19189
	1890	Q16254	Transcription factor E2F4 OS=Homo sapiens GN=E2F4 PE=1 SV=2 - [E2F4_HUMAN]	32.2	1	1	10	15	413	43.9333	4.75439
	1891	Q16186	Proteasomal ubiquitin receptor ADRM1 OS=Homo sapiens GN=ADRM1 PE=1 SV=2 - [ADRM1_HUMAN]	32.19	1	1	11	50	407	42.1268	5.07178
	1892	O43186	Cone-rod homeobox protein OS=Homo sapiens GN=CRX PE=1 SV=1 - [CRX_HUMAN]	32.11	1	1	5	14	299	32.241	9.15869
	1893	Q9Y219	Protein jagged-2 OS=Homo sapiens GN=JAG2 PE=1 SV=3 - [JAG2_HUMAN]	32.07	2	1	24	45	1238	133.277	5.8335
	1894	Q92737	Ras-like protein family member 10A OS=Homo sapiens GN=RASL10A PE=1 SV=1 - [RSLAA_HUMAN]	32.02	2	1	5	9	203	22.5268	9.72998
	1895	Q8N187	Calcium-responsive transcription factor OS=Homo sapiens GN=CARF PE=1 SV=2 - [CARTF_HUMAN]	32	1	1	14	16	725	80.6476	5.69385
	1896	P10646-2	Isoform Beta of Tissue factor pathway inhibitor OS=Homo sapiens GN=TFPI - [TFPI1_HUMAN]	31.87	2	1	5	10	251	28.6336	5.33838
	1897	P83731	60S ribosomal protein L24 OS=Homo sapiens GN=RPL24 PE=1 SV=1 - [RL24_HUMAN]	31.85	1	2	6	33	157	17.7679	11.2534
	1898	Q96RV3	Pecanex-like protein 1 OS=Homo sapiens GN=PCNX PE=1 SV=2 - [PCX1_HUMAN]	31.82	2	1	52	124	2341	258.514	7.21045
	1899	Q8IXS2-2	Isoform 2 of Coiled-coil domain-containing protein 65 OS=Homo sapiens GN=CCDC65 - [CCD65_HUMAN]	31.79	2	1	14	25	497	58.7039	7.94287
	1900	Q5SY16	Polynucleotide 5'-hydroxyl-kinase NOL9 OS=Homo sapiens GN=NOL9 PE=1 SV=1 - [NOL9_HUMAN]	31.77	1	1	14	33	702	79.2722	9.12939
	1901	P36507	Dual specificity mitogen-activated protein kinase kinase 2 OS=Homo sapiens GN=MAP2K2 PE=1 SV=1 - [MP2K2_HUMAN]	31.75	1	2	12	37	400	44.3961	6.55127
	1902	Q9UQD0-3	Isoform 3 of Sodium channel protein type 8 subunit alpha OS=Homo sapiens GN=SCN8A - [SCN8A_HUMAN]	31.74	4	1	44	90	1991	226.278	6.23975
	1903	Q06323	Proteasome activator complex subunit 1 OS=Homo sapiens GN=PSME1 PE=1 SV=1 - [PSME1_HUMAN]	31.73	1	1	7	15	249	28.705	6.02393
	1904	Q8IZT6	Abnormal spindle-like microcephaly-associated protein OS=Homo sapiens GN=ASPM PE=1 SV=2 - [ASPM_HUMAN]	31.69	1	1	92	291	3477	409.54	10.4478
	1905	Q9NW97	Transmembrane protein 51 OS=Homo sapiens GN=TMEM51 PE=1 SV=1 - [TMM51_HUMAN]	31.62	1	1	4	9	253	27.7421	5.52881
	1906	P43681	Neuronal acetylcholine receptor subunit alpha-4 OS=Homo sapiens GN=CHRNA4 PE=1 SV=2 - [ACHA4_HUMAN]	31.58	1	1	12	32	627	69.912	7.21045
	1907	Q16236	Nuclear factor erythroid 2-related factor 2 OS=Homo sapiens GN=NFE2L2 PE=1 SV=3 - [NF2L2_HUMAN]	31.57	3	1	12	44	605	67.7844	4.77979
	1908	Q5JU00	T-complex-associated testis-expressed protein 1 OS=Homo sapiens GN=TCTE1 PE=2 SV=1 - [TCTE1_HUMAN]	31.54	1	1	9	12	501	55.5975	6.80029
	1909	Q8IYQ7	Threonine synthase-like 1 OS=Homo sapiens GN=THNSL1 PE=1 SV=2 - [THNS1_HUMAN]	31.49	1	1	16	46	743	83.0171	7.12256
	1910	P54707	Potassium-transporting ATPase alpha chain 2 OS=Homo sapiens GN=ATP12A PE=1 SV=3 - [AT12A_HUMAN]	31.38	2	1	23	89	1039	115.437	6.55127
	1911	Q14103-3	Isoform 3 of Heterogeneous nuclear ribonucleoprotein D0 OS=Homo sapiens GN=HNRNPD - [HNRPD_HUMAN]	31.37	7	2	10	20	306	32.8141	8.1626
	1912	P08473	Neprilysin OS=Homo sapiens GN=MME PE=1 SV=2 - [NEP_HUMAN]	31.33	1	2	20	50	750	85.4599	5.73193
	1913	P51801	Chloride channel protein ClC-Kb OS=Homo sapiens GN=CLCNKB PE=1 SV=3 - [CLCKB_HUMAN]	31.3	5	1	14	100	687	75.397	8.00146
	1914	P54727	UV excision repair protein RAD23 homolog B OS=Homo sapiens GN=RAD23B PE=1 SV=1 - [RD23B_HUMAN]	31.3	2	3	9	26	409	43.1446	4.84326
	1915	Q5BKU9	Oxidoreductase-like domain-containing protein 1 OS=Homo sapiens GN=OXLD1 PE=2 SV=1 - [OXLD1_HUMAN]	31.29	1	1	4	19	147	15.8448	8.22119
	1916	P46778	60S ribosomal protein L21 OS=Homo sapiens GN=RPL21 PE=1 SV=2 - [RL21_HUMAN]	31.25	1	1	7	26	160	18.5531	10.4917
	1917	Q9BYV6	Tripartite motif-containing protein 55 OS=Homo sapiens GN=TRIM55 PE=1 SV=2 - [TRI55_HUMAN]	31.2	4	1	12	23	548	60.4273	4.76709
	1918	P09496-2	Isoform Non-brain of Clathrin light chain A OS=Homo sapiens GN=CLTA - [CLCA_HUMAN]	31.19	5	4	8	44	218	23.6474	4.52588
	1919	Q9H8P0	Polyprenol reductase OS=Homo sapiens GN=SRD5A3 PE=1 SV=1 - [PORED_HUMAN]	31.13	1	1	5	16	318	36.4971	9.39307
	1920	O60238	BCL2/adenovirus E1B 19 kDa protein-interacting protein 3-like OS=Homo sapiens GN=BNIP3L PE=1 SV=1 - [BNI3L_HUMAN]	31.05	1	1	4	14	219	23.9155	5.84619
	1921	Q17RC7	Exocyst complex component 3-like protein 4 OS=Homo sapiens GN=EXOC3L4 PE=2 SV=2 - [EX3L4_HUMAN]	30.89	1	2	21	111	722	79.8461	6.31592
	1922	Q8NG06	Tripartite motif-containing protein 58 OS=Homo sapiens GN=TRIM58 PE=2 SV=2 - [TRI58_HUMAN]	30.86	1	1	10	22	486	54.7315	6.18896
	1923	Q9H0R1	AP-5 complex subunit mu-1 OS=Homo sapiens GN=AP5M1 PE=1 SV=2 - [AP5M1_HUMAN]	30.82	1	1	10	20	490	54.7319	6.60986
	1924	Q15629	Translocating chain-associated membrane protein 1 OS=Homo sapiens GN=TRAM1 PE=1 SV=3 - [TRAM1_HUMAN]	30.75	1	1	10	17	374	43.0438	9.62744
	1925	Q8NHP1-2	Isoform 2 of Aflatoxin B1 aldehyde reductase member 4 OS=Homo sapiens GN=AKR7L - [ARK74_HUMAN]	30.72	1	1	4	18	153	16.7131	7.53271
	1926	P98161-2	Isoform 2 of Polycystin-1 OS=Homo sapiens GN=PKD1 - [PKD1_HUMAN]	30.71	3	2	81	173	4292	461.075	6.771
	1927	Q6ZUX7	Lipoma HMGIC fusion partner-like 2 protein OS=Homo sapiens GN=LHFPL2 PE=2 SV=2 - [LHPL2_HUMAN]	30.7	1	1	5	7	228	24.4693	6.49365
	1928	Q9UKJ1	Paired immunoglobulin-like type 2 receptor alpha OS=Homo sapiens GN=PILRA PE=1 SV=3 - [PILRA_HUMAN]	30.69	2	1	7	17	303	33.9836	10.2134
	1929	Q9NZZ3	Charged multivesicular body protein 5 OS=Homo sapiens GN=CHMP5 PE=1 SV=1 - [CHMP5_HUMAN]	30.59	2	1	4	9	219	24.5554	4.83057
	1930	Q9HAP2-3	Isoform 3 of MLX-interacting protein OS=Homo sapiens GN=MLXIP - [MLXIP_HUMAN]	30.57	2	1	9	20	628	69.0468	7.37158
	1931	P20742	Pregnancy zone protein OS=Homo sapiens GN=PZP PE=1 SV=4 - [PZP_HUMAN]	30.5	2	1	27	56	1482	163.76	6.37939
	1932	Q9UM21	Alpha-1,3-mannosyl-glycoprotein 4-beta-N-acetylglucosaminyltransferase A OS=Homo sapiens GN=MGAT4A PE=1 SV=1 - [MGT4A_HUMAN]	30.47	1	1	11	22	535	61.5051	7.40088
	1933	P41180-2	Isoform 2 of Extracellular calcium-sensing receptor OS=Homo sapiens GN=CASR - [CASR_HUMAN]	30.42	2	1	15	41	1088	121.694	5.96045
	1934	Q9H2H9	Sodium-coupled neutral amino acid transporter 1 OS=Homo sapiens GN=SLC38A1 PE=1 SV=1 - [S38A1_HUMAN]	30.39	1	2	8	16	487	54.0122	7.02002
	1935	Q7L9L4-2	Isoform 2 of MOB kinase activator 1B OS=Homo sapiens GN=MOB1B - [MOB1B_HUMAN]	30.32	3	1	5	24	221	25.4827	6.15088
	1936	O00264	Membrane-associated progesterone receptor component 1 OS=Homo sapiens GN=PGRMC1 PE=1 SV=3 - [PGRC1_HUMAN]	30.26	1	3	5	26	195	21.6578	4.70361
	1937	Q9ULF5	Zinc transporter ZIP10 OS=Homo sapiens GN=SLC39A10 PE=1 SV=2 - [S39AA_HUMAN]	30.2	1	3	15	21	831	94.0727	6.75635
	1938	O43776	Asparagine--tRNA ligase, cytoplasmic OS=Homo sapiens GN=NARS PE=1 SV=1 - [SYNC_HUMAN]	30.11	1	2	15	46	548	62.9025	6.25244
	1939	Q92734-2	Isoform 2 of Protein TFG OS=Homo sapiens GN=TFG - [TFG_HUMAN]	30.05	2	2	10	23	396	42.994	5.17334
	1940	Q5JNZ3	Zinc finger protein 311 OS=Homo sapiens GN=ZNF311 PE=2 SV=2 - [ZN311_HUMAN]	30.03	1	1	14	17	666	76.2724	8.71924
	1941	Q8TCC7-3	Isoform 3 of Solute carrier family 22 member 8 OS=Homo sapiens GN=SLC22A8 - [S22A8_HUMAN]	30	1	1	2	3	110	11.4952	7.18115
	1942	P56192	Methionine--tRNA ligase, cytoplasmic OS=Homo sapiens GN=MARS PE=1 SV=2 - [SYMC_HUMAN]	30	1	1	19	56	900	101.052	6.16357
	1943	O95365	Zinc finger and BTB domain-containing protein 7A OS=Homo sapiens GN=ZBTB7A PE=1 SV=1 - [ZBT7A_HUMAN]	29.97	1	1	11	39	584	61.4008	5.18604
	1944	Q9BQ31	Potassium voltage-gated channel subfamily S member 3 OS=Homo sapiens GN=KCNS3 PE=2 SV=3 - [KCNS3_HUMAN]	29.94	1	1	9	18	491	55.9648	5.03369
	1945	Q9Y5G4	Protocadherin gamma-A9 OS=Homo sapiens GN=PCDHGA9 PE=2 SV=1 - [PCDG9_HUMAN]	29.83	2	1	17	44	932	101.625	5.04639
	1946	Q96KQ4	Apoptosis-stimulating of p53 protein 1 OS=Homo sapiens GN=PPP1R13B PE=1 SV=3 - [ASPP1_HUMAN]	29.82	1	1	21	45	1090	119.492	6.75635
	1947	Q96N64	PWWP domain-containing protein 2A OS=Homo sapiens GN=PWWP2A PE=1 SV=2 - [PWP2A_HUMAN]	29.8	2	1	13	47	755	81.9098	8.99756
	1948	Q86WK7	Amphoterin-induced protein 3 OS=Homo sapiens GN=AMIGO3 PE=2 SV=1 - [AMGO3_HUMAN]	29.76	1	1	12	49	504	55.2145	7.86963
	1949	Q9NZP6	Nuclear pore-associated protein 1 OS=Homo sapiens GN=NPAP1 PE=1 SV=2 - [NPAP1_HUMAN]	29.67	1	1	22	75	1156	120.878	8.68994
	1950	Q8N3A8	Poly [ADP-ribose] polymerase 8 OS=Homo sapiens GN=PARP8 PE=2 SV=1 - [PARP8_HUMAN]	29.63	2	1	21	137	854	95.8104	8.27979
	1951	Q8N5D6-2	Isoform 2 of Globoside alpha-1,3-N-acetylgalactosaminyltransferase 1 OS=Homo sapiens GN=GBGT1 - [GBGT1_HUMAN]	29.59	2	1	7	29	294	32.6657	10.4771
	1952	O95373	Importin-7 OS=Homo sapiens GN=IPO7 PE=1 SV=1 - [IPO7_HUMAN]	29.58	1	2	21	61	1038	119.44	4.81787
	1953	Q7Z3S7-5	Isoform 5 of Voltage-dependent calcium channel subunit alpha-2/delta-4 OS=Homo sapiens GN=CACNA2D4 - [CA2D4_HUMAN]	29.55	5	1	19	52	1154	129.854	5.47803
	1954	Q9Y624	Junctional adhesion molecule A OS=Homo sapiens GN=F11R PE=1 SV=1 - [JAM1_HUMAN]	29.43	1	2	8	10	299	32.5625	7.89893
	1955	P22234	Multifunctional protein ADE2 OS=Homo sapiens GN=PAICS PE=1 SV=3 - [PUR6_HUMAN]	29.41	2	6	12	52	425	47.0491	7.2251
	1956	P62847-4	Isoform 4 of 40S ribosomal protein S24 OS=Homo sapiens GN=RPS24 - [RS24_HUMAN]	29.41	4	1	7	20	289	32.4099	10.1548
	1957	O00629	Importin subunit alpha-3 OS=Homo sapiens GN=KPNA4 PE=1 SV=1 - [IMA3_HUMAN]	29.37	2	2	7	28	521	57.8506	4.95752
	1958	Q8WV92	MIT domain-containing protein 1 OS=Homo sapiens GN=MITD1 PE=1 SV=1 - [MITD1_HUMAN]	29.32	1	1	5	11	249	29.296	8.00146
	1959	Q9H4K7	Mitochondrial ribosome-associated GTPase 2 OS=Homo sapiens GN=MTG2 PE=1 SV=1 - [MTG2_HUMAN]	29.31	1	1	9	15	406	43.9281	9.45166
	1960	P62917	60S ribosomal protein L8 OS=Homo sapiens GN=RPL8 PE=1 SV=2 - [RL8_HUMAN]	29.18	1	2	6	27	257	28.0073	11.0337
	1961	Q8N2Y8	Iporin OS=Homo sapiens GN=RUSC2 PE=1 SV=3 - [RUSC2_HUMAN]	29.16	1	1	34	96	1516	161.125	6.62451
	1962	P62263	40S ribosomal protein S14 OS=Homo sapiens GN=RPS14 PE=1 SV=3 - [RS14_HUMAN]	29.14	1	2	4	35	151	16.2625	10.0522
	1963	P06454-2	Isoform 2 of Prothymosin alpha OS=Homo sapiens GN=PTMA - [PTMA_HUMAN]	29.09	2	1	2	9	110	12.0669	3.78955
	1964	P30279	G1/S-specific cyclin-D2 OS=Homo sapiens GN=CCND2 PE=1 SV=1 - [CCND2_HUMAN]	29.07	1	1	4	10	289	33.0458	5.18604
	1965	P49914	5-formyltetrahydrofolate cyclo-ligase OS=Homo sapiens GN=MTHFS PE=1 SV=2 - [MTHFS_HUMAN]	29.06	2	1	5	12	203	23.2409	7.88428
	1966	P50281	Matrix metalloproteinase-14 OS=Homo sapiens GN=MMP14 PE=1 SV=3 - [MMP14_HUMAN]	29.04	1	6	15	44	582	65.852	7.76709
	1967	Q96NA8	t-SNARE domain-containing protein 1 OS=Homo sapiens GN=TSNARE1 PE=2 SV=2 - [TSNA1_HUMAN]	29.04	1	1	12	45	513	55.9138	9.01221
	1968	P78316	Nucleolar protein 14 OS=Homo sapiens GN=NOP14 PE=1 SV=3 - [NOP14_HUMAN]	28.94	2	1	22	60	857	97.6074	7.57666
	1969	A6BM72	Multiple epidermal growth factor-like domains protein 11 OS=Homo sapiens GN=MEGF11 PE=2 SV=3 - [MEG11_HUMAN]	28.74	2	1	18	35	1044	110.766	6.21436
	1970	P41218	Myeloid cell nuclear differentiation antigen OS=Homo sapiens GN=MNDA PE=1 SV=1 - [MNDA_HUMAN]	28.5	1	1	10	35	407	45.8072	9.75928
	1971	P19022	Cadherin-2 OS=Homo sapiens GN=CDH2 PE=1 SV=4 - [CADH2_HUMAN]	28.48	1	1	16	32	906	99.7473	4.80518
	1972	Q9BRL6-2	Isoform 2 of Serine/arginine-rich splicing factor 8 OS=Homo sapiens GN=SRSF8 - [SRSF8_HUMAN]	28.36	3	2	7	19	275	31.4058	11.6782
	1973	Q9H0C3	Transmembrane protein 117 OS=Homo sapiens GN=TMEM117 PE=2 SV=1 - [TM117_HUMAN]	28.21	1	1	12	41	514	60.1455	8.57275
	1974	O75844	CAAX prenyl protease 1 homolog OS=Homo sapiens GN=ZMPSTE24 PE=1 SV=2 - [FACE1_HUMAN]	28.21	1	1	8	11	475	54.7775	7.48877
	1975	O75964	ATP synthase subunit g, mitochondrial OS=Homo sapiens GN=ATP5L PE=1 SV=3 - [ATP5L_HUMAN]	28.16	1	1	2	2	103	11.4212	9.64209
	1976	O60641	Clathrin coat assembly protein AP180 OS=Homo sapiens GN=SNAP91 PE=1 SV=2 - [AP180_HUMAN]	28.11	8	1	20	64	907	92.444	4.85596
	1977	Q5JXB2	Putative ubiquitin-conjugating enzyme E2 N-like OS=Homo sapiens GN=UBE2NL PE=1 SV=1 - [UE2NL_HUMAN]	28.1	2	1	6	48	153	17.3661	5.92236
	1978	Q9H5V8	CUB domain-containing protein 1 OS=Homo sapiens GN=CDCP1 PE=1 SV=3 - [CDCP1_HUMAN]	27.99	2	1	14	21	836	92.8724	7.95752
	1979	Q15032-2	Isoform 2 of R3H domain-containing protein 1 OS=Homo sapiens GN=R3HDM1 - [R3HD1_HUMAN]	27.94	2	1	23	70	970	107.511	8.80713
	1980	P55010	Eukaryotic translation initiation factor 5 OS=Homo sapiens GN=EIF5 PE=1 SV=2 - [IF5_HUMAN]	27.84	1	2	12	21	431	49.1918	5.57959
	1981	Q9HCU5	Prolactin regulatory element-binding protein OS=Homo sapiens GN=PREB PE=1 SV=2 - [PREB_HUMAN]	27.58	1	1	8	19	417	45.4397	7.88428
	1982	Q8TB96	T-cell immunomodulatory protein OS=Homo sapiens GN=ITFG1 PE=1 SV=1 - [TIP_HUMAN]	27.29	1	1	11	15	612	68.0645	5.38916
	1983	Q86WA9	Sodium-independent sulfate anion transporter OS=Homo sapiens GN=SLC26A11 PE=1 SV=2 - [S2611_HUMAN]	27.23	1	1	11	23	606	65.2566	7.31299
	1984	P62851	40S ribosomal protein S25 OS=Homo sapiens GN=RPS25 PE=1 SV=1 - [RS25_HUMAN]	27.2	1	3	4	15	125	13.7337	10.1108
	1985	P98073	Enteropeptidase OS=Homo sapiens GN=TMPRSS15 PE=1 SV=3 - [ENTK_HUMAN]	27.18	1	1	15	27	1019	112.863	5.03369
	1986	Q9GZW8-2	Isoform 2 of Membrane-spanning 4-domains subfamily A member 7 OS=Homo sapiens GN=MS4A7 - [MS4A7_HUMAN]	27.18	2	1	3	84	195	21.3907	6.52197
	1987	Q8N8Z3	Proline-rich protein 26 OS=Homo sapiens GN=PRR26 PE=2 SV=1 - [PRR26_HUMAN]	27.15	1	1	5	11	221	24.1923	11.2241
	1988	P57088	Transmembrane protein 33 OS=Homo sapiens GN=TMEM33 PE=1 SV=2 - [TMM33_HUMAN]	27.13	1	2	7	32	247	27.9598	9.70068
	1989	Q03519	Antigen peptide transporter 2 OS=Homo sapiens GN=TAP2 PE=1 SV=1 - [TAP2_HUMAN]	27.11	2	1	12	26	686	75.6158	8.01611
	1990	Q15041	ADP-ribosylation factor-like protein 6-interacting protein 1 OS=Homo sapiens GN=ARL6IP1 PE=1 SV=2 - [AR6P1_HUMAN]	27.09	1	1	5	12	203	23.3474	9.31982
	1991	P30825	High affinity cationic amino acid transporter 1 OS=Homo sapiens GN=SLC7A1 PE=1 SV=1 - [CTR1_HUMAN]	27.03	1	4	10	41	629	67.5941	5.42725
	1992	Q96KG7	Multiple epidermal growth factor-like domains protein 10 OS=Homo sapiens GN=MEGF10 PE=1 SV=1 - [MEG10_HUMAN]	27.02	2	1	16	43	1140	122.121	6.87354
	1993	Q9C0H2	Protein tweety homolog 3 OS=Homo sapiens GN=TTYH3 PE=1 SV=3 - [TTYH3_HUMAN]	26.96	4	1	10	32	523	57.5079	5.38916
	1994	O15427	Monocarboxylate transporter 4 OS=Homo sapiens GN=SLC16A3 PE=1 SV=1 - [MOT4_HUMAN]	26.88	1	3	6	15	465	49.4369	7.95752
	1995	Q9Y345	Sodium- and chloride-dependent glycine transporter 2 OS=Homo sapiens GN=SLC6A5 PE=1 SV=3 - [SC6A5_HUMAN]	26.85	1	1	13	56	797	87.3764	7.51807
	1996	Q01650	Large neutral amino acids transporter small subunit 1 OS=Homo sapiens GN=SLC7A5 PE=1 SV=2 - [LAT1_HUMAN]	26.82	2	2	10	56	507	54.9743	7.72314
	1997	Q13606	Olfactory receptor 5I1 OS=Homo sapiens GN=OR5I1 PE=2 SV=1 - [OR5I1_HUMAN]	26.75	1	1	3	3	314	36.0247	7.98682
	1998	Q8N815	Cyclin N-terminal domain-containing protein 1 OS=Homo sapiens GN=CNTD1 PE=2 SV=2 - [CNTD1_HUMAN]	26.67	1	1	7	15	330	36.8974	6.93213
[truncated: 91 more rows]
