# Supplementary material for: Global extracellular vesicle proteomic signature defines U87-MG glioma cell hypoxic status with potential implications for non-invasive diagnostics
Source: J Neurooncol. 2019 Aug 14;144(3):477–88. doi: 10.1007/s11060-019-03262-4 (PMC6764937; doi:10.1007/s11060-019-03262-4)
Supplement: Supplementary file 7 — Supplementary file7 (XLSX 62 kb) [file 11060_2019_3262_MOESM7_ESM.xlsx]

## Sheet: Sheet1
	Supplementary Table 3. Protein identities found unique in EVs isolated from hypoxic compared to normoxic U87 glioblastoma cells as determined by NG LC-MS/MS data and Venny 2.1.
	No.	Accession	Description
	1	A8MS94	Putative golgin subfamily A member 2-like protein 5 OS=Homo sapiens PE=5 SV=2 - [GG2L5_HUMAN]
	2	P63027	Vesicle-associated membrane protein 2 OS=Homo sapiens GN=VAMP2 PE=1 SV=3 - [VAMP2_HUMAN]
	3	P52434	DNA-directed RNA polymerases I, II, and III subunit RPABC3 OS=Homo sapiens GN=POLR2H PE=1 SV=4 - [RPAB3_HUMAN]
	4	Q9P1U0	DNA-directed RNA polymerase I subunit RPA12 OS=Homo sapiens GN=ZNRD1 PE=1 SV=1 - [RPA12_HUMAN]
	5	P81277	Prolactin-releasing peptide OS=Homo sapiens GN=PRLH PE=2 SV=1 - [PRRP_HUMAN]
	6	P49721	Proteasome subunit beta type-2 OS=Homo sapiens GN=PSMB2 PE=1 SV=1 - [PSB2_HUMAN]
	7	Q9BV86	N-terminal Xaa-Pro-Lys N-methyltransferase 1 OS=Homo sapiens GN=NTMT1 PE=1 SV=3 - [NTM1A_HUMAN]
	8	O60888-3	Isoform C of Protein CutA OS=Homo sapiens GN=CUTA - [CUTA_HUMAN]
	9	P31942-2	Isoform 2 of Heterogeneous nuclear ribonucleoprotein H3 OS=Homo sapiens GN=HNRNPH3 - [HNRH3_HUMAN]
	10	P26998	Beta-crystallin B3 OS=Homo sapiens GN=CRYBB3 PE=1 SV=4 - [CRBB3_HUMAN]
	11	Q8N6I4	Transmembrane protein 251 OS=Homo sapiens GN=TMEM251 PE=2 SV=4 - [TM251_HUMAN]
	12	O43399-5	Isoform 5 of Tumor protein D54 OS=Homo sapiens GN=TPD52L2 - [TPD54_HUMAN]
	13	Q8WUH1	Protein Churchill OS=Homo sapiens GN=CHURC1 PE=1 SV=2 - [CHUR_HUMAN]
	14	P02042	Hemoglobin subunit delta OS=Homo sapiens GN=HBD PE=1 SV=2 - [HBD_HUMAN]
	15	P13640-2	Isoform 2 of Metallothionein-1G OS=Homo sapiens GN=MT1G - [MT1G_HUMAN]
	16	P63167	Dynein light chain 1, cytoplasmic OS=Homo sapiens GN=DYNLL1 PE=1 SV=1 - [DYL1_HUMAN]
	17	Q13501-2	Isoform 2 of Sequestosome-1 OS=Homo sapiens GN=SQSTM1 - [SQSTM_HUMAN]
	18	Q8TE04-2	Isoform 2 of Pantothenate kinase 1 OS=Homo sapiens GN=PANK1 - [PANK1_HUMAN]
	19	P32856-3	Isoform 2 of Syntaxin-2 OS=Homo sapiens GN=STX2 - [STX2_HUMAN]
	20	P24666-2	Isoform 2 of Low molecular weight phosphotyrosine protein phosphatase OS=Homo sapiens GN=ACP1 - [PPAC_HUMAN]
	21	O60682	Musculin OS=Homo sapiens GN=MSC PE=1 SV=2 - [MUSC_HUMAN]
	22	P17936	Insulin-like growth factor-binding protein 3 OS=Homo sapiens GN=IGFBP3 PE=1 SV=2 - [IBP3_HUMAN]
	23	Q6PJG6	BRCA1-associated ATM activator 1 OS=Homo sapiens GN=BRAT1 PE=1 SV=2 - [BRAT1_HUMAN]
	24	P28062	Proteasome subunit beta type-8 OS=Homo sapiens GN=PSMB8 PE=1 SV=3 - [PSB8_HUMAN]
	25	Q6SA08-2	Isoform 2 of Testis-specific serine/threonine-protein kinase 4 OS=Homo sapiens GN=TSSK4 - [TSSK4_HUMAN]
	26	O00165-6	Isoform 6 of HCLS1-associated protein X-1 OS=Homo sapiens GN=HAX1 - [HAX1_HUMAN]
	27	E5RJM6-2	Isoform 2 of Ankyrin repeat domain-containing protein 65 OS=Homo sapiens GN=ANKRD65 - [ANR65_HUMAN]
	28	P01708	Ig lambda chain V-II region BUR OS=Homo sapiens PE=1 SV=1 - [LV205_HUMAN]
	29	Q9BWD1	Acetyl-CoA acetyltransferase, cytosolic OS=Homo sapiens GN=ACAT2 PE=1 SV=2 - [THIC_HUMAN]
	30	Q03013-2	Isoform 2 of Glutathione S-transferase Mu 4 OS=Homo sapiens GN=GSTM4 - [GSTM4_HUMAN]
	31	P04075	Fructose-bisphosphate aldolase A OS=Homo sapiens GN=ALDOA PE=1 SV=2 - [ALDOA_HUMAN]
	32	P09471-2	Isoform Alpha-2 of Guanine nucleotide-binding protein G(o) subunit alpha OS=Homo sapiens GN=GNAO1 - [GNAO_HUMAN]
	33	O43678	NADH dehydrogenase [ubiquinone] 1 alpha subcomplex subunit 2 OS=Homo sapiens GN=NDUFA2 PE=1 SV=3 - [NDUA2_HUMAN]
	34	Q8NEU8-3	Isoform 3 of DCC-interacting protein 13-beta OS=Homo sapiens GN=APPL2 - [DP13B_HUMAN]
	35	Q8IW50-4	Isoform 4 of Protein FAM219A OS=Homo sapiens GN=FAM219A - [F219A_HUMAN]
	36	P0C7L1	Serine protease inhibitor Kazal-type 8 OS=Homo sapiens GN=SPINK8 PE=2 SV=1 - [ISK8_HUMAN]
	37	Q99436	Proteasome subunit beta type-7 OS=Homo sapiens GN=PSMB7 PE=1 SV=1 - [PSB7_HUMAN]
	38	P51161-2	Isoform 2 of Gastrotropin OS=Homo sapiens GN=FABP6 - [FABP6_HUMAN]
	39	Q8TAQ9	SUN domain-containing protein 3 OS=Homo sapiens GN=SUN3 PE=2 SV=4 - [SUN3_HUMAN]
	40	Q16842	CMP-N-acetylneuraminate-beta-galactosamide-alpha-2,3-sialyltransferase 2 OS=Homo sapiens GN=ST3GAL2 PE=2 SV=1 - [SIA4B_HUMAN]
	41	Q6IPX3-2	Isoform 2 of Transcription elongation factor A protein-like 6 OS=Homo sapiens GN=TCEAL6 - [TCAL6_HUMAN]
	42	Q9UHQ1-3	Isoform 3 of Nuclear prelamin A recognition factor OS=Homo sapiens GN=NARF - [NARF_HUMAN]
	43	Q16777	Histone H2A type 2-C OS=Homo sapiens GN=HIST2H2AC PE=1 SV=4 - [H2A2C_HUMAN]
	44	Q96PB8	Leucine-rich repeat-containing protein 3B OS=Homo sapiens GN=LRRC3B PE=2 SV=1 - [LRC3B_HUMAN]
	45	Q5QNW6-2	Isoform 2 of Histone H2B type 2-F OS=Homo sapiens GN=HIST2H2BF - [H2B2F_HUMAN]
	46	Q15672	Twist-related protein 1 OS=Homo sapiens GN=TWIST1 PE=1 SV=1 - [TWST1_HUMAN]
	47	Q06210	Glutamine--fructose-6-phosphate aminotransferase [isomerizing] 1 OS=Homo sapiens GN=GFPT1 PE=1 SV=3 - [GFPT1_HUMAN]
	48	P52429	Diacylglycerol kinase epsilon OS=Homo sapiens GN=DGKE PE=1 SV=1 - [DGKE_HUMAN]
	49	Q12799-2	Isoform 2 of T-complex protein 10A homolog OS=Homo sapiens GN=TCP10 - [TCP10_HUMAN]
	50	Q6ZS02	Putative GED domain-containing protein DNM1P46 OS=Homo sapiens GN=DNM1P46 PE=5 SV=1 - [DMP46_HUMAN]
	51	Q13303-3	Isoform 3 of Voltage-gated potassium channel subunit beta-2 OS=Homo sapiens GN=KCNAB2 - [KCAB2_HUMAN]
	52	Q86UD7	TBC1 domain family member 26 OS=Homo sapiens GN=TBC1D26 PE=2 SV=3 - [TBC26_HUMAN]
	53	Q15366-3	Isoform 3 of Poly(rC)-binding protein 2 OS=Homo sapiens GN=PCBP2 - [PCBP2_HUMAN]
	54	P08174-2	Isoform 1 of Complement decay-accelerating factor OS=Homo sapiens GN=CD55 - [DAF_HUMAN]
	55	Q8IUX1-2	Isoform 2 of Transmembrane protein 126B OS=Homo sapiens GN=TMEM126B - [T126B_HUMAN]
	56	P08195-2	Isoform 2 of 4F2 cell-surface antigen heavy chain OS=Homo sapiens GN=SLC3A2 - [4F2_HUMAN]
	57	Q6UXS9	Inactive caspase-12 OS=Homo sapiens GN=CASP12 PE=2 SV=2 - [CASPC_HUMAN]
	58	Q9UNM6-2	Isoform 2 of 26S proteasome non-ATPase regulatory subunit 13 OS=Homo sapiens GN=PSMD13 - [PSD13_HUMAN]
	59	Q99873-4	Isoform 4 of Protein arginine N-methyltransferase 1 OS=Homo sapiens GN=PRMT1 - [ANM1_HUMAN]
	60	P58294	Prokineticin-1 OS=Homo sapiens GN=PROK1 PE=1 SV=1 - [PROK1_HUMAN]
	61	Q08257	Quinone oxidoreductase OS=Homo sapiens GN=CRYZ PE=1 SV=1 - [QOR_HUMAN]
	62	Q9H9B4	Sideroflexin-1 OS=Homo sapiens GN=SFXN1 PE=1 SV=4 - [SFXN1_HUMAN]
	63	P35221-2	Isoform 2 of Catenin alpha-1 OS=Homo sapiens GN=CTNNA1 - [CTNA1_HUMAN]
	64	Q8N0U4	Protein FAM185A OS=Homo sapiens GN=FAM185A PE=2 SV=3 - [F185A_HUMAN]
	65	P0C7N1	Olfactory receptor 8U8 OS=Homo sapiens GN=OR8U8 PE=2 SV=1 - [OR8U8_HUMAN]
	66	Q96JD6-5	Isoform 5 of 1,5-anhydro-D-fructose reductase OS=Homo sapiens GN=AKR1E2 - [AKCL2_HUMAN]
	67	O14994	Synapsin-3 OS=Homo sapiens GN=SYN3 PE=1 SV=2 - [SYN3_HUMAN]
	68	O15527-5	Isoform 2B of N-glycosylase/DNA lyase OS=Homo sapiens GN=OGG1 - [OGG1_HUMAN]
	69	Q13409-6	Isoform 2F of Cytoplasmic dynein 1 intermediate chain 2 OS=Homo sapiens GN=DYNC1I2 - [DC1I2_HUMAN]
	70	Q53F39-4	Isoform 4 of Metallophosphoesterase 1 OS=Homo sapiens GN=MPPE1 - [MPPE1_HUMAN]
	71	Q13740	CD166 antigen OS=Homo sapiens GN=ALCAM PE=1 SV=2 - [CD166_HUMAN]
	72	P57729	Ras-related protein Rab-38 OS=Homo sapiens GN=RAB38 PE=1 SV=1 - [RAB38_HUMAN]
	73	A2RTY3-3	Isoform 3 of Uncharacterized protein C17orf66 OS=Homo sapiens GN=C17orf66 - [CQ066_HUMAN]
	74	Q9UGI8-2	Isoform 2 of Testin OS=Homo sapiens GN=TES - [TES_HUMAN]
	75	A6NKZ8	Putative tubulin beta chain-like protein ENSP00000290377 OS=Homo sapiens PE=5 SV=2 - [YI016_HUMAN]
	76	Q9H7V2	Synapse differentiation-inducing gene protein 1 OS=Homo sapiens GN=SYNDIG1 PE=2 SV=1 - [SYNG1_HUMAN]
	77	P20807-3	Isoform III of Calpain-3 OS=Homo sapiens GN=CAPN3 - [CAN3_HUMAN]
	78	P32189-2	Isoform 2 of Glycerol kinase OS=Homo sapiens GN=GK - [GLPK_HUMAN]
	79	Q76G19	PDZ domain-containing protein 4 OS=Homo sapiens GN=PDZD4 PE=1 SV=1 - [PDZD4_HUMAN]
	80	P17677	Neuromodulin OS=Homo sapiens GN=GAP43 PE=1 SV=1 - [NEUM_HUMAN]
	81	Q5JRA6	Melanoma inhibitory activity protein 3 OS=Homo sapiens GN=MIA3 PE=1 SV=1 - [MIA3_HUMAN]
	82	P31431	Syndecan-4 OS=Homo sapiens GN=SDC4 PE=1 SV=2 - [SDC4_HUMAN]
	83	Q8WX92	Negative elongation factor B OS=Homo sapiens GN=NELFB PE=1 SV=1 - [NELFB_HUMAN]
	84	Q9H0U9	Testis-specific Y-encoded-like protein 1 OS=Homo sapiens GN=TSPYL1 PE=1 SV=3 - [TSYL1_HUMAN]
	85	Q7Z6J4	FYVE, RhoGEF and PH domain-containing protein 2 OS=Homo sapiens GN=FGD2 PE=2 SV=1 - [FGD2_HUMAN]
	86	O43310-2	Isoform 2 of CBP80/20-dependent translation initiation factor OS=Homo sapiens GN=CTIF - [CTIF_HUMAN]
	87	O94876	Transmembrane and coiled-coil domains protein 1 OS=Homo sapiens GN=TMCC1 PE=1 SV=3 - [TMCC1_HUMAN]
	88	Q9BW66-3	Isoform 3 of Cyclin-dependent kinase 2-interacting protein OS=Homo sapiens GN=CINP - [CINP_HUMAN]
	89	P12081-2	Isoform 2 of Histidine--tRNA ligase, cytoplasmic OS=Homo sapiens GN=HARS - [SYHC_HUMAN]
	90	Q04759	Protein kinase C theta type OS=Homo sapiens GN=PRKCQ PE=1 SV=3 - [KPCT_HUMAN]
	91	Q86W92-2	Isoform 2 of Liprin-beta-1 OS=Homo sapiens GN=PPFIBP1 - [LIPB1_HUMAN]
	92	Q8IZP0-2	Isoform 2 of Abl interactor 1 OS=Homo sapiens GN=ABI1 - [ABI1_HUMAN]
	93	Q8ND25-2	Isoform 2 of E3 ubiquitin-protein ligase ZNRF1 OS=Homo sapiens GN=ZNRF1 - [ZNRF1_HUMAN]
	94	P07602	Proactivator polypeptide OS=Homo sapiens GN=PSAP PE=1 SV=2 - [SAP_HUMAN]
	95	Q9Y262-2	Isoform 2 of Eukaryotic translation initiation factor 3 subunit L OS=Homo sapiens GN=EIF3L - [EIF3L_HUMAN]
	96	Q9P2W9	Syntaxin-18 OS=Homo sapiens GN=STX18 PE=1 SV=1 - [STX18_HUMAN]
	97	Q9Y2A7-2	Isoform 2 of Nck-associated protein 1 OS=Homo sapiens GN=NCKAP1 - [NCKP1_HUMAN]
	98	P28838	Cytosol aminopeptidase OS=Homo sapiens GN=LAP3 PE=1 SV=3 - [AMPL_HUMAN]
	99	A1A5D9	Bicaudal D-related protein 2 OS=Homo sapiens GN=CCDC64B PE=2 SV=2 - [BICR2_HUMAN]
	100	Q01813	6-phosphofructokinase type C OS=Homo sapiens GN=PFKP PE=1 SV=2 - [K6PP_HUMAN]
	101	P06748	Nucleophosmin OS=Homo sapiens GN=NPM1 PE=1 SV=2 - [NPM_HUMAN]
	102	Q6ZVU0	Putative uncharacterized protein FLJ42102 OS=Homo sapiens PE=5 SV=1 - [YK022_HUMAN]
	103	O00339-3	Isoform 3 of Matrilin-2 OS=Homo sapiens GN=MATN2 - [MATN2_HUMAN]
	104	Q03405	Urokinase plasminogen activator surface receptor OS=Homo sapiens GN=PLAUR PE=1 SV=1 - [UPAR_HUMAN]
	105	P67775	Serine/threonine-protein phosphatase 2A catalytic subunit alpha isoform OS=Homo sapiens GN=PPP2CA PE=1 SV=1 - [PP2AA_HUMAN]
	106	Q92932-3	Isoform 3 of Receptor-type tyrosine-protein phosphatase N2 OS=Homo sapiens GN=PTPRN2 - [PTPR2_HUMAN]
	107	O75947	ATP synthase subunit d, mitochondrial OS=Homo sapiens GN=ATP5H PE=1 SV=3 - [ATP5H_HUMAN]
	108	O75312	Zinc finger protein ZPR1 OS=Homo sapiens GN=ZNF259 PE=1 SV=1 - [ZPR1_HUMAN]
	109	Q49A17	Polypeptide N-acetylgalactosaminyltransferase-like 6 OS=Homo sapiens GN=GALNTL6 PE=2 SV=2 - [GLTL6_HUMAN]
	110	P28223-2	Isoform 2 of 5-hydroxytryptamine receptor 2A OS=Homo sapiens GN=HTR2A - [5HT2A_HUMAN]
	111	Q9H6S0	Probable ATP-dependent RNA helicase YTHDC2 OS=Homo sapiens GN=YTHDC2 PE=1 SV=2 - [YTDC2_HUMAN]
	112	Q5JTZ9	Alanine--tRNA ligase, mitochondrial OS=Homo sapiens GN=AARS2 PE=1 SV=1 - [SYAM_HUMAN]
	113	P48147	Prolyl endopeptidase OS=Homo sapiens GN=PREP PE=1 SV=2 - [PPCE_HUMAN]
	114	P48736	Phosphatidylinositol 4,5-bisphosphate 3-kinase catalytic subunit gamma isoform OS=Homo sapiens GN=PIK3CG PE=1 SV=3 - [PK3CG_HUMAN]
	115	P23396	40S ribosomal protein S3 OS=Homo sapiens GN=RPS3 PE=1 SV=2 - [RS3_HUMAN]
	116	P00505	Aspartate aminotransferase, mitochondrial OS=Homo sapiens GN=GOT2 PE=1 SV=3 - [AATM_HUMAN]
	117	Q9UL12	Sarcosine dehydrogenase, mitochondrial OS=Homo sapiens GN=SARDH PE=1 SV=1 - [SARDH_HUMAN]
	118	Q9H9E3	Conserved oligomeric Golgi complex subunit 4 OS=Homo sapiens GN=COG4 PE=1 SV=3 - [COG4_HUMAN]
	119	P62993	Growth factor receptor-bound protein 2 OS=Homo sapiens GN=GRB2 PE=1 SV=1 - [GRB2_HUMAN]
	120	O43829	Zinc finger and BTB domain-containing protein 14 OS=Homo sapiens GN=ZBTB14 PE=1 SV=2 - [ZBT14_HUMAN]
	121	Q16790	Carbonic anhydrase 9 OS=Homo sapiens GN=CA9 PE=1 SV=2 - [CAH9_HUMAN]
	122	O15231-6	Isoform 6 of Zinc finger protein 185 OS=Homo sapiens GN=ZNF185 - [ZN185_HUMAN]
	123	Q9H9P8	L-2-hydroxyglutarate dehydrogenase, mitochondrial OS=Homo sapiens GN=L2HGDH PE=1 SV=3 - [L2HDH_HUMAN]
	124	Q9C0H5-2	Isoform 2 of Rho GTPase-activating protein 39 OS=Homo sapiens GN=ARHGAP39 - [RHG39_HUMAN]
	125	P62195-2	Isoform 2 of 26S protease regulatory subunit 8 OS=Homo sapiens GN=PSMC5 - [PRS8_HUMAN]
	126	Q12918	Killer cell lectin-like receptor subfamily B member 1 OS=Homo sapiens GN=KLRB1 PE=1 SV=1 - [KLRB1_HUMAN]
	127	Q9P2K5	Myelin expression factor 2 OS=Homo sapiens GN=MYEF2 PE=1 SV=3 - [MYEF2_HUMAN]
	128	Q5JUR7	Testis-expressed sequence 30 protein OS=Homo sapiens GN=TEX30 PE=2 SV=1 - [TEX30_HUMAN]
	129	Q9H0B3-2	Isoform 2 of Uncharacterized protein KIAA1683 OS=Homo sapiens GN=KIAA1683 - [K1683_HUMAN]
	130	Q6NZ67	Mitotic-spindle organizing protein 2B OS=Homo sapiens GN=MZT2B PE=1 SV=1 - [MZT2B_HUMAN]
	131	P17948	Vascular endothelial growth factor receptor 1 OS=Homo sapiens GN=FLT1 PE=1 SV=2 - [VGFR1_HUMAN]
	132	Q8NET4	Retrotransposon gag domain-containing protein 1 OS=Homo sapiens GN=RGAG1 PE=1 SV=1 - [RGAG1_HUMAN]
	133	Q9Y272	Dexamethasone-induced Ras-related protein 1 OS=Homo sapiens GN=RASD1 PE=1 SV=1 - [RASD1_HUMAN]
	134	Q16585	Beta-sarcoglycan OS=Homo sapiens GN=SGCB PE=1 SV=1 - [SGCB_HUMAN]
	135	P26447	Protein S100-A4 OS=Homo sapiens GN=S100A4 PE=1 SV=1 - [S10A4_HUMAN]
	136	Q9Y617-2	Isoform 2 of Phosphoserine aminotransferase OS=Homo sapiens GN=PSAT1 - [SERC_HUMAN]
	137	Q7Z3C6	Autophagy-related protein 9A OS=Homo sapiens GN=ATG9A PE=1 SV=3 - [ATG9A_HUMAN]
	138	O14638	Ectonucleotide pyrophosphatase/phosphodiesterase family member 3 OS=Homo sapiens GN=ENPP3 PE=1 SV=2 - [ENPP3_HUMAN]
	139	Q99576-4	Isoform 3 of TSC22 domain family protein 3 OS=Homo sapiens GN=TSC22D3 - [T22D3_HUMAN]
	140	Q9UBL9-7	Isoform K of P2X purinoceptor 2 OS=Homo sapiens GN=P2RX2 - [P2RX2_HUMAN]
	141	Q8N5L8	Ribonuclease P protein subunit p25-like protein OS=Homo sapiens GN=RPP25L PE=1 SV=1 - [RP25L_HUMAN]
	142	Q13705	Activin receptor type-2B OS=Homo sapiens GN=ACVR2B PE=1 SV=3 - [AVR2B_HUMAN]
	143	Q9NVM1	Protein eva-1 homolog B OS=Homo sapiens GN=EVA1B PE=1 SV=1 - [EVA1B_HUMAN]
	144	P04229	HLA class II histocompatibility antigen, DRB1-1 beta chain OS=Homo sapiens GN=HLA-DRB1 PE=1 SV=2 - [2B11_HUMAN]
	145	Q13490	Baculoviral IAP repeat-containing protein 2 OS=Homo sapiens GN=BIRC2 PE=1 SV=2 - [BIRC2_HUMAN]
	146	P29323-2	Isoform 2 of Ephrin type-B receptor 2 OS=Homo sapiens GN=EPHB2 - [EPHB2_HUMAN]
	147	P0CG42	Putative protein FAM157B OS=Homo sapiens GN=FAM157B PE=3 SV=1 - [F157B_HUMAN]
	148	Q96JE9	Microtubule-associated protein 6 OS=Homo sapiens GN=MAP6 PE=1 SV=2 - [MAP6_HUMAN]
	149	A6NJR5	Putative speedy protein-like protein 3 OS=Homo sapiens PE=5 SV=3 - [SPDL3_HUMAN]
	150	P34897	Serine hydroxymethyltransferase, mitochondrial OS=Homo sapiens GN=SHMT2 PE=1 SV=3 - [GLYM_HUMAN]
	151	Q9P2B7	UPF0501 protein KIAA1430 OS=Homo sapiens GN=KIAA1430 PE=1 SV=2 - [K1430_HUMAN]
	152	Q9BW91-2	Isoform 2 of ADP-ribose pyrophosphatase, mitochondrial OS=Homo sapiens GN=NUDT9 - [NUDT9_HUMAN]
	153	O60716-3	Isoform 1AC of Catenin delta-1 OS=Homo sapiens GN=CTNND1 - [CTND1_HUMAN]
	154	Q9UL63	Muskelin OS=Homo sapiens GN=MKLN1 PE=1 SV=2 - [MKLN1_HUMAN]
	155	A1L1A6	Immunoglobulin superfamily member 23 OS=Homo sapiens GN=IGSF23 PE=2 SV=2 - [IGS23_HUMAN]
	156	Q9UKG9-3	Isoform 3 of Peroxisomal carnitine O-octanoyltransferase OS=Homo sapiens GN=CROT - [OCTC_HUMAN]
	157	Q8WVM8	Sec1 family domain-containing protein 1 OS=Homo sapiens GN=SCFD1 PE=1 SV=4 - [SCFD1_HUMAN]
	158	Q6ZMI3	Gliomedin OS=Homo sapiens GN=GLDN PE=2 SV=1 - [GLDN_HUMAN]
	159	P55263-3	Isoform 3 of Adenosine kinase OS=Homo sapiens GN=ADK - [ADK_HUMAN]
	160	P52789	Hexokinase-2 OS=Homo sapiens GN=HK2 PE=1 SV=2 - [HXK2_HUMAN]
	161	P31930	Cytochrome b-c1 complex subunit 1, mitochondrial OS=Homo sapiens GN=UQCRC1 PE=1 SV=3 - [QCR1_HUMAN]
	162	Q9HBF4	Zinc finger FYVE domain-containing protein 1 OS=Homo sapiens GN=ZFYVE1 PE=1 SV=1 - [ZFYV1_HUMAN]
	163	Q8WXI9	Transcriptional repressor p66-beta OS=Homo sapiens GN=GATAD2B PE=1 SV=1 - [P66B_HUMAN]
	164	Q9Y4E5-4	Isoform 3 of Zinc finger protein 451 OS=Homo sapiens GN=ZNF451 - [ZN451_HUMAN]
	165	P05121	Plasminogen activator inhibitor 1 OS=Homo sapiens GN=SERPINE1 PE=1 SV=1 - [PAI1_HUMAN]
	166	Q2TAA5	GDP-Man:Man(3)GlcNAc(2)-PP-Dol alpha-1,2-mannosyltransferase OS=Homo sapiens GN=ALG11 PE=1 SV=2 - [ALG11_HUMAN]
	167	Q658P3-3	Isoform 3 of Metalloreductase STEAP3 OS=Homo sapiens GN=STEAP3 - [STEA3_HUMAN]
	168	Q9NVI7-2	Isoform 2 of ATPase family AAA domain-containing protein 3A OS=Homo sapiens GN=ATAD3A - [ATD3A_HUMAN]
	169	Q15436	Protein transport protein Sec23A OS=Homo sapiens GN=SEC23A PE=1 SV=2 - [SC23A_HUMAN]
	170	Q86X52	Chondroitin sulfate synthase 1 OS=Homo sapiens GN=CHSY1 PE=1 SV=3 - [CHSS1_HUMAN]
	171	Q15738	Sterol-4-alpha-carboxylate 3-dehydrogenase, decarboxylating OS=Homo sapiens GN=NSDHL PE=1 SV=2 - [NSDHL_HUMAN]
	172	Q1MX18	Protein inscuteable homolog OS=Homo sapiens GN=INSC PE=1 SV=1 - [INSC_HUMAN]
	173	Q6ZQY3	Glutamate decarboxylase-like protein 1 OS=Homo sapiens GN=GADL1 PE=2 SV=4 - [GADL1_HUMAN]
	174	Q9H1P3	Oxysterol-binding protein-related protein 2 OS=Homo sapiens GN=OSBPL2 PE=1 SV=1 - [OSBL2_HUMAN]
	175	Q9ULU8-3	Isoform 3 of Calcium-dependent secretion activator 1 OS=Homo sapiens GN=CADPS - [CAPS1_HUMAN]
	176	O94887	FERM, RhoGEF and pleckstrin domain-containing protein 2 OS=Homo sapiens GN=FARP2 PE=1 SV=3 - [FARP2_HUMAN]
	177	P52926-4	Isoform 4 of High mobility group protein HMGI-C OS=Homo sapiens GN=HMGA2 - [HMGA2_HUMAN]
	178	O94856-13	Isoform 13 of Neurofascin OS=Homo sapiens GN=NFASC - [NFASC_HUMAN]
	179	O15519	CASP8 and FADD-like apoptosis regulator OS=Homo sapiens GN=CFLAR PE=1 SV=1 - [CFLAR_HUMAN]
	180	O75771-5	Isoform 5 of DNA repair protein RAD51 homolog 4 OS=Homo sapiens GN=RAD51D - [RA51D_HUMAN]
	181	Q8N4U5	T-complex protein 11-like protein 2 OS=Homo sapiens GN=TCP11L2 PE=2 SV=1 - [T11L2_HUMAN]
	182	Q96JP0	Protein fem-1 homolog C OS=Homo sapiens GN=FEM1C PE=2 SV=1 - [FEM1C_HUMAN]
	183	Q8NBU5	ATPase family AAA domain-containing protein 1 OS=Homo sapiens GN=ATAD1 PE=1 SV=1 - [ATAD1_HUMAN]
	184	A2A288	Probable ribonuclease ZC3H12D OS=Homo sapiens GN=ZC3H12D PE=2 SV=3 - [ZC12D_HUMAN]
	185	P15735-2	Isoform 2 of Phosphorylase b kinase gamma catalytic chain, liver/testis isoform OS=Homo sapiens GN=PHKG2 - [PHKG2_HUMAN]
	186	P0CG21	NHL-repeat-containing protein 4 OS=Homo sapiens GN=NHLRC4 PE=2 SV=1 - [NHLC4_HUMAN]
	187	O00159-3	Isoform 3 of Unconventional myosin-Ic OS=Homo sapiens GN=MYO1C - [MYO1C_HUMAN]
	188	Q14155-3	Isoform 3 of Rho guanine nucleotide exchange factor 7 OS=Homo sapiens GN=ARHGEF7 - [ARHG7_HUMAN]
	189	Q8N944	APC membrane recruitment protein 3 OS=Homo sapiens GN=AMER3 PE=2 SV=2 - [AMER3_HUMAN]
	190	Q7Z4N2-3	Isoform 3 of Transient receptor potential cation channel subfamily M member 1 OS=Homo sapiens GN=TRPM1 - [TRPM1_HUMAN]
	191	Q02952	A-kinase anchor protein 12 OS=Homo sapiens GN=AKAP12 PE=1 SV=4 - [AKA12_HUMAN]
	192	O95294-4	Isoform 4 of RasGAP-activating-like protein 1 OS=Homo sapiens GN=RASAL1 - [RASL1_HUMAN]
	193	Q96B86-2	Isoform 2 of Repulsive guidance molecule A OS=Homo sapiens GN=RGMA - [RGMA_HUMAN]
	194	Q9NX46	Poly(ADP-ribose) glycohydrolase ARH3 OS=Homo sapiens GN=ADPRHL2 PE=1 SV=1 - [ARHL2_HUMAN]
	195	Q96PB7	Noelin-3 OS=Homo sapiens GN=OLFM3 PE=2 SV=1 - [NOE3_HUMAN]
	196	Q9UL68-2	Isoform 2 of Myelin transcription factor 1-like protein OS=Homo sapiens GN=MYT1L - [MYT1L_HUMAN]
	197	Q16401	26S proteasome non-ATPase regulatory subunit 5 OS=Homo sapiens GN=PSMD5 PE=1 SV=3 - [PSMD5_HUMAN]
	198	Q9UKV8-2	Isoform 2 of Protein argonaute-2 OS=Homo sapiens GN=AGO2 - [AGO2_HUMAN]
	199	O95865	N(G),N(G)-dimethylarginine dimethylaminohydrolase 2 OS=Homo sapiens GN=DDAH2 PE=1 SV=1 - [DDAH2_HUMAN]
	200	P00918	Carbonic anhydrase 2 OS=Homo sapiens GN=CA2 PE=1 SV=2 - [CAH2_HUMAN]
	201	P05783	Keratin, type I cytoskeletal 18 OS=Homo sapiens GN=KRT18 PE=1 SV=2 - [K1C18_HUMAN]
	202	Q92974-3	Isoform 3 of Rho guanine nucleotide exchange factor 2 OS=Homo sapiens GN=ARHGEF2 - [ARHG2_HUMAN]
	203	Q9H6Z9	Egl nine homolog 3 OS=Homo sapiens GN=EGLN3 PE=1 SV=1 - [EGLN3_HUMAN]
	204	Q12959-3	Isoform 3 of Disks large homolog 1 OS=Homo sapiens GN=DLG1 - [DLG1_HUMAN]
	205	P50479	PDZ and LIM domain protein 4 OS=Homo sapiens GN=PDLIM4 PE=1 SV=2 - [PDLI4_HUMAN]
	206	Q8N8B7-2	Isoform 2 of Transcription elongation factor A N-terminal and central domain-containing protein OS=Homo sapiens GN=TCEANC - [TEANC_HUMAN]
	207	Q03060-32	Isoform 29 of cAMP-responsive element modulator OS=Homo sapiens GN=CREM - [CREM_HUMAN]
	208	Q8NHU6	Tudor domain-containing protein 7 OS=Homo sapiens GN=TDRD7 PE=1 SV=2 - [TDRD7_HUMAN]
	209	Q96JJ3	Engulfment and cell motility protein 2 OS=Homo sapiens GN=ELMO2 PE=1 SV=2 - [ELMO2_HUMAN]
	210	P25940	Collagen alpha-3(V) chain OS=Homo sapiens GN=COL5A3 PE=1 SV=3 - [CO5A3_HUMAN]
	211	Q9NUU7	ATP-dependent RNA helicase DDX19A OS=Homo sapiens GN=DDX19A PE=1 SV=1 - [DD19A_HUMAN]
	212	Q9NQY0-2	Isoform 2 of Bridging integrator 3 OS=Homo sapiens GN=BIN3 - [BIN3_HUMAN]
	213	Q702N8	Xin actin-binding repeat-containing protein 1 OS=Homo sapiens GN=XIRP1 PE=1 SV=1 - [XIRP1_HUMAN]
	214	Q9Y5Z6	Beta-1,3-galactosyltransferase 1 OS=Homo sapiens GN=B3GALT1 PE=2 SV=1 - [B3GT1_HUMAN]
	215	Q5VTB9	E3 ubiquitin-protein ligase RNF220 OS=Homo sapiens GN=RNF220 PE=1 SV=1 - [RN220_HUMAN]
	216	Q6IN85-2	Isoform 2 of Serine/threonine-protein phosphatase 4 regulatory subunit 3A OS=Homo sapiens GN=SMEK1 - [P4R3A_HUMAN]
	217	P40925	Malate dehydrogenase, cytoplasmic OS=Homo sapiens GN=MDH1 PE=1 SV=4 - [MDHC_HUMAN]
	218	Q9HAW0	Transcription factor IIIB 50 kDa subunit OS=Homo sapiens GN=BRF2 PE=1 SV=1 - [BRF2_HUMAN]
	219	Q86UP0-2	Isoform 2 of Cadherin-24 OS=Homo sapiens GN=CDH24 - [CAD24_HUMAN]
	220	Q9UL49-1	Isoform 1 of Transcription factor-like 5 protein OS=Homo sapiens GN=TCFL5 - [TCFL5_HUMAN]
	221	Q6ZTY8	Putative uncharacterized protein C12orf63 OS=Homo sapiens GN=C12orf63 PE=2 SV=2 - [CL063_HUMAN]
	222	O00444-2	Isoform 2 of Serine/threonine-protein kinase PLK4 OS=Homo sapiens GN=PLK4 - [PLK4_HUMAN]
	223	O43291-2	Isoform 2 of Kunitz-type protease inhibitor 2 OS=Homo sapiens GN=SPINT2 - [SPIT2_HUMAN]
	224	P61289	Proteasome activator complex subunit 3 OS=Homo sapiens GN=PSME3 PE=1 SV=1 - [PSME3_HUMAN]
	225	Q6IEZ7	Olfactory receptor 2T5 OS=Homo sapiens GN=OR2T5 PE=2 SV=1 - [OR2T5_HUMAN]
	226	Q9Y250-2	Isoform 2 of Leucine zipper putative tumor suppressor 1 OS=Homo sapiens GN=LZTS1 - [LZTS1_HUMAN]
	227	O95819-5	Isoform 5 of Mitogen-activated protein kinase kinase kinase kinase 4 OS=Homo sapiens GN=MAP4K4 - [M4K4_HUMAN]
	228	O75469-3	Isoform 1C of Nuclear receptor subfamily 1 group I member 2 OS=Homo sapiens GN=NR1I2 - [NR1I2_HUMAN]
	229	Q07912-3	Isoform 3 of Activated CDC42 kinase 1 OS=Homo sapiens GN=TNK2 - [ACK1_HUMAN]
	230	Q13064	Probable E3 ubiquitin-protein ligase makorin-3 OS=Homo sapiens GN=MKRN3 PE=1 SV=1 - [MKRN3_HUMAN]
	231	P23634-7	Isoform ZB of Plasma membrane calcium-transporting ATPase 4 OS=Homo sapiens GN=ATP2B4 - [AT2B4_HUMAN]
	232	O43283	Mitogen-activated protein kinase kinase kinase 13 OS=Homo sapiens GN=MAP3K13 PE=1 SV=1 - [M3K13_HUMAN]
	233	A1L167	Ubiquitin-conjugating enzyme E2Q-like protein 1 OS=Homo sapiens GN=UBE2QL1 PE=2 SV=2 - [U2QL1_HUMAN]
	234	Q9Y5Q8-2	Isoform 2 of General transcription factor 3C polypeptide 5 OS=Homo sapiens GN=GTF3C5 - [TF3C5_HUMAN]
	235	Q16769	Glutaminyl-peptide cyclotransferase OS=Homo sapiens GN=QPCT PE=1 SV=1 - [QPCT_HUMAN]
	236	P05129	Protein kinase C gamma type OS=Homo sapiens GN=PRKCG PE=1 SV=3 - [KPCG_HUMAN]
	237	P13637	Sodium/potassium-transporting ATPase subunit alpha-3 OS=Homo sapiens GN=ATP1A3 PE=1 SV=3 - [AT1A3_HUMAN]
	238	O15327	Type II inositol 3,4-bisphosphate 4-phosphatase OS=Homo sapiens GN=INPP4B PE=2 SV=4 - [INP4B_HUMAN]
	239	P20290	Transcription factor BTF3 OS=Homo sapiens GN=BTF3 PE=1 SV=1 - [BTF3_HUMAN]
	240	Q68DA7-5	Isoform 5 of Formin-1 OS=Homo sapiens GN=FMN1 - [FMN1_HUMAN]
	241	Q9H081	Protein MIS12 homolog OS=Homo sapiens GN=MIS12 PE=1 SV=1 - [MIS12_HUMAN]
	242	Q9H361	Polyadenylate-binding protein 3 OS=Homo sapiens GN=PABPC3 PE=1 SV=2 - [PABP3_HUMAN]
	243	Q9NTJ4-2	Isoform 2 of Alpha-mannosidase 2C1 OS=Homo sapiens GN=MAN2C1 - [MA2C1_HUMAN]
	244	P40121	Macrophage-capping protein OS=Homo sapiens GN=CAPG PE=1 SV=2 - [CAPG_HUMAN]
	245	Q13155	Aminoacyl tRNA synthase complex-interacting multifunctional protein 2 OS=Homo sapiens GN=AIMP2 PE=1 SV=2 - [AIMP2_HUMAN]
	246	P61326	Protein mago nashi homolog OS=Homo sapiens GN=MAGOH PE=1 SV=1 - [MGN_HUMAN]
	247	P48382	DNA-binding protein RFX5 OS=Homo sapiens GN=RFX5 PE=1 SV=1 - [RFX5_HUMAN]
	248	O95817	BAG family molecular chaperone regulator 3 OS=Homo sapiens GN=BAG3 PE=1 SV=3 - [BAG3_HUMAN]
	249	Q8TAM6-2	Isoform 2 of Ermin OS=Homo sapiens GN=ERMN - [ERMIN_HUMAN]
	250	P10515	Dihydrolipoyllysine-residue acetyltransferase component of pyruvate dehydrogenase complex, mitochondrial OS=Homo sapiens GN=DLAT PE=1 SV=3 - [ODP2_HUMAN]
	251	Q7L985	Leucine-rich repeat and immunoglobulin-like domain-containing nogo receptor-interacting protein 2 OS=Homo sapiens GN=LINGO2 PE=1 SV=1 - [LIGO2_HUMAN]
	252	Q9Y6N5	Sulfide:quinone oxidoreductase, mitochondrial OS=Homo sapiens GN=SQRDL PE=1 SV=1 - [SQRD_HUMAN]
	253	Q9Y2I2	Netrin-G1 OS=Homo sapiens GN=NTNG1 PE=1 SV=3 - [NTNG1_HUMAN]
	254	Q3SXY8	ADP-ribosylation factor-like protein 13B OS=Homo sapiens GN=ARL13B PE=1 SV=1 - [AR13B_HUMAN]
	255	P05187	Alkaline phosphatase, placental type OS=Homo sapiens GN=ALPP PE=1 SV=2 - [PPB1_HUMAN]
	256	Q9Y3M8	StAR-related lipid transfer protein 13 OS=Homo sapiens GN=STARD13 PE=1 SV=2 - [STA13_HUMAN]
	257	Q96K12	Fatty acyl-CoA reductase 2 OS=Homo sapiens GN=FAR2 PE=2 SV=1 - [FACR2_HUMAN]
	258	P60866-2	Isoform 2 of 40S ribosomal protein S20 OS=Homo sapiens GN=RPS20 - [RS20_HUMAN]
	259	Q9Y483	Metal-response element-binding transcription factor 2 OS=Homo sapiens GN=MTF2 PE=1 SV=2 - [MTF2_HUMAN]
	260	Q8N4S7	Progestin and adipoQ receptor family member 4 OS=Homo sapiens GN=PAQR4 PE=2 SV=3 - [PAQR4_HUMAN]
	261	Q9NV70	Exocyst complex component 1 OS=Homo sapiens GN=EXOC1 PE=1 SV=4 - [EXOC1_HUMAN]
	262	Q8TF66-2	Isoform 2 of Leucine-rich repeat-containing protein 15 OS=Homo sapiens GN=LRRC15 - [LRC15_HUMAN]
	263	Q9H252-2	Isoform 2 of Potassium voltage-gated channel subfamily H member 6 OS=Homo sapiens GN=KCNH6 - [KCNH6_HUMAN]
	264	Q8IXJ9	Putative Polycomb group protein ASXL1 OS=Homo sapiens GN=ASXL1 PE=1 SV=3 - [ASXL1_HUMAN]
	265	Q01081	Splicing factor U2AF 35 kDa subunit OS=Homo sapiens GN=U2AF1 PE=1 SV=3 - [U2AF1_HUMAN]
	266	Q15404	Ras suppressor protein 1 OS=Homo sapiens GN=RSU1 PE=1 SV=3 - [RSU1_HUMAN]
	267	Q9Y4F4	Protein FAM179B OS=Homo sapiens GN=FAM179B PE=1 SV=4 - [F179B_HUMAN]
	268	Q9Y2B0	Protein canopy homolog 2 OS=Homo sapiens GN=CNPY2 PE=1 SV=1 - [CNPY2_HUMAN]
	269	Q07092-2	Isoform 2 of Collagen alpha-1(XVI) chain OS=Homo sapiens GN=COL16A1 - [COGA1_HUMAN]
	270	Q9HCR9-2	Isoform 2 of Dual 3',5'-cyclic-AMP and -GMP phosphodiesterase 11A OS=Homo sapiens GN=PDE11A - [PDE11_HUMAN]
	271	Q13907-2	Isoform 2 of Isopentenyl-diphosphate Delta-isomerase 1 OS=Homo sapiens GN=IDI1 - [IDI1_HUMAN]
	272	P10276-2	Isoform Alpha-2 of Retinoic acid receptor alpha OS=Homo sapiens GN=RARA - [RARA_HUMAN]
	273	Q96MT8	Centrosomal protein of 63 kDa OS=Homo sapiens GN=CEP63 PE=1 SV=1 - [CEP63_HUMAN]
	274	P28222	5-hydroxytryptamine receptor 1B OS=Homo sapiens GN=HTR1B PE=1 SV=1 - [5HT1B_HUMAN]
	275	A6NJT0	Homeobox protein unc-4 homolog OS=Homo sapiens GN=UNCX PE=2 SV=1 - [UNC4_HUMAN]
	276	P35573	Glycogen debranching enzyme OS=Homo sapiens GN=AGL PE=1 SV=3 - [GDE_HUMAN]
	277	Q495B1-1	Isoform 1 of Ankyrin repeat and death domain-containing protein 1A OS=Homo sapiens GN=ANKDD1A - [AKD1A_HUMAN]
	278	P62495	Eukaryotic peptide chain release factor subunit 1 OS=Homo sapiens GN=ETF1 PE=1 SV=3 - [ERF1_HUMAN]
	279	Q8NEV1	Casein kinase II subunit alpha 3 OS=Homo sapiens GN=CSNK2A3 PE=1 SV=2 - [CSK23_HUMAN]
	280	A6NNM8	Tubulin polyglutamylase TTLL13 OS=Homo sapiens GN=TTLL13 PE=2 SV=2 - [TTL13_HUMAN]
	281	Q5H9R7	Serine/threonine-protein phosphatase 6 regulatory subunit 3 OS=Homo sapiens GN=PPP6R3 PE=1 SV=2 - [PP6R3_HUMAN]
	282	Q96EN8	Molybdenum cofactor sulfurase OS=Homo sapiens GN=MOCOS PE=1 SV=2 - [MOCOS_HUMAN]
	283	O43869	Olfactory receptor 2T1 OS=Homo sapiens GN=OR2T1 PE=2 SV=3 - [OR2T1_HUMAN]
	284	O75477	Erlin-1 OS=Homo sapiens GN=ERLIN1 PE=1 SV=1 - [ERLN1_HUMAN]
	285	O75335-2	Isoform 2 of Liprin-alpha-4 OS=Homo sapiens GN=PPFIA4 - [LIPA4_HUMAN]
	286	O60242	Brain-specific angiogenesis inhibitor 3 OS=Homo sapiens GN=BAI3 PE=1 SV=2 - [BAI3_HUMAN]
	287	Q9P1Z2	Calcium-binding and coiled-coil domain-containing protein 1 OS=Homo sapiens GN=CALCOCO1 PE=1 SV=2 - [CACO1_HUMAN]
	288	Q9BQB4-2	Isoform 2 of Sclerostin OS=Homo sapiens GN=SOST - [SOST_HUMAN]
	289	Q96PU5	E3 ubiquitin-protein ligase NEDD4-like OS=Homo sapiens GN=NEDD4L PE=1 SV=2 - [NED4L_HUMAN]
	290	Q86V48	Leucine zipper protein 1 OS=Homo sapiens GN=LUZP1 PE=1 SV=2 - [LUZP1_HUMAN]
	291	Q9P2K8-2	Isoform 2 of Eukaryotic translation initiation factor 2-alpha kinase 4 OS=Homo sapiens GN=EIF2AK4 - [E2AK4_HUMAN]
	292	O95522	PRAME family member 12 OS=Homo sapiens GN=PRAMEF12 PE=2 SV=1 - [PRA12_HUMAN]
	293	O60784-4	Isoform 4 of Target of Myb protein 1 OS=Homo sapiens GN=TOM1 - [TOM1_HUMAN]
	294	Q13283	Ras GTPase-activating protein-binding protein 1 OS=Homo sapiens GN=G3BP1 PE=1 SV=1 - [G3BP1_HUMAN]
	295	Q96N16-2	Isoform 2 of Janus kinase and microtubule-interacting protein 1 OS=Homo sapiens GN=JAKMIP1 - [JKIP1_HUMAN]
	296	A6NNP5-4	Isoform 4 of Coiled-coil domain-containing protein 169 OS=Homo sapiens GN=CCDC169 - [CC169_HUMAN]
	297	O00469-2	Isoform 2 of Procollagen-lysine,2-oxoglutarate 5-dioxygenase 2 OS=Homo sapiens GN=PLOD2 - [PLOD2_HUMAN]
	298	Q9NRC6	Spectrin beta chain, non-erythrocytic 5 OS=Homo sapiens GN=SPTBN5 PE=1 SV=1 - [SPTN5_HUMAN]
	299	Q8TD57	Dynein heavy chain 3, axonemal OS=Homo sapiens GN=DNAH3 PE=2 SV=1 - [DYH3_HUMAN]
	300	P32004-3	Isoform 3 of Neural cell adhesion molecule L1 OS=Homo sapiens GN=L1CAM - [L1CAM_HUMAN]
	301	Q68BL8	Olfactomedin-like protein 2B OS=Homo sapiens GN=OLFML2B PE=2 SV=2 - [OLM2B_HUMAN]
	302	P38405-2	Isoform 2 of Guanine nucleotide-binding protein G(olf) subunit alpha OS=Homo sapiens GN=GNAL - [GNAL_HUMAN]
	303	Q96Q42	Alsin OS=Homo sapiens GN=ALS2 PE=1 SV=2 - [ALS2_HUMAN]
	304	Q4ADV7	Protein RIC1 homolog OS=Homo sapiens GN=KIAA1432 PE=1 SV=2 - [RIC1_HUMAN]
	305	Q9NYF3	Protein FAM53C OS=Homo sapiens GN=FAM53C PE=1 SV=1 - [FA53C_HUMAN]
	306	O15061	Synemin OS=Homo sapiens GN=SYNM PE=1 SV=2 - [SYNEM_HUMAN]
	307	P12694	2-oxoisovalerate dehydrogenase subunit alpha, mitochondrial OS=Homo sapiens GN=BCKDHA PE=1 SV=2 - [ODBA_HUMAN]
	308	Q9H3K6	BolA-like protein 2 OS=Homo sapiens GN=BOLA2 PE=1 SV=1 - [BOLA2_HUMAN]
	309	Q8NFY9	Kelch repeat and BTB domain-containing protein 8 OS=Homo sapiens GN=KBTBD8 PE=2 SV=2 - [KBTB8_HUMAN]
	310	P48739	Phosphatidylinositol transfer protein beta isoform OS=Homo sapiens GN=PITPNB PE=1 SV=2 - [PIPNB_HUMAN]
	311	P51805	Plexin-A3 OS=Homo sapiens GN=PLXNA3 PE=1 SV=2 - [PLXA3_HUMAN]
	312	Q5JST6	EF-hand domain-containing family member C2 OS=Homo sapiens GN=EFHC2 PE=1 SV=2 - [EFHC2_HUMAN]
	313	Q96T51	RUN and FYVE domain-containing protein 1 OS=Homo sapiens GN=RUFY1 PE=1 SV=2 - [RUFY1_HUMAN]
	314	Q9H078-4	Isoform 4 of Caseinolytic peptidase B protein homolog OS=Homo sapiens GN=CLPB - [CLPB_HUMAN]
	315	Q9NRZ9	Lymphoid-specific helicase OS=Homo sapiens GN=HELLS PE=1 SV=1 - [HELLS_HUMAN]
	316	P41226	Ubiquitin-like modifier-activating enzyme 7 OS=Homo sapiens GN=UBA7 PE=1 SV=2 - [UBA7_HUMAN]
	317	Q96L50-2	Isoform 2 of Leucine-rich repeat protein 1 OS=Homo sapiens GN=LRR1 - [LLR1_HUMAN]
	318	P16333	Cytoplasmic protein NCK1 OS=Homo sapiens GN=NCK1 PE=1 SV=1 - [NCK1_HUMAN]
	319	Q68DX3	FERM and PDZ domain-containing protein 2 OS=Homo sapiens GN=FRMPD2 PE=1 SV=3 - [FRPD2_HUMAN]
	320	Q86UU1-2	Isoform 2 of Pleckstrin homology-like domain family B member 1 OS=Homo sapiens GN=PHLDB1 - [PHLB1_HUMAN]
	321	Q8N9Y4	Protein FAM181A OS=Homo sapiens GN=FAM181A PE=2 SV=3 - [F181A_HUMAN]
	322	O15438-4	Isoform 4 of Canalicular multispecific organic anion transporter 2 OS=Homo sapiens GN=ABCC3 - [MRP3_HUMAN]
	323	Q6UX72	UDP-GlcNAc:betaGal beta-1,3-N-acetylglucosaminyltransferase 9 OS=Homo sapiens GN=B3GNT9 PE=2 SV=1 - [B3GN9_HUMAN]
	324	A6NKP2	Putative short-chain dehydrogenase/reductase family 42E member 2 OS=Homo sapiens GN=SDR42E2 PE=3 SV=3 - [D42E2_HUMAN]
	325	Q9Y242	Transcription factor 19 OS=Homo sapiens GN=TCF19 PE=1 SV=2 - [TCF19_HUMAN]
	326	O14617-5	Isoform 5 of AP-3 complex subunit delta-1 OS=Homo sapiens GN=AP3D1 - [AP3D1_HUMAN]
	327	P23468-2	Isoform 2 of Receptor-type tyrosine-protein phosphatase delta OS=Homo sapiens GN=PTPRD - [PTPRD_HUMAN]
	328	Q53SF7-2	Isoform 2 of Cordon-bleu protein-like 1 OS=Homo sapiens GN=COBLL1 - [COBL1_HUMAN]
	329	Q9Y5H6	Protocadherin alpha-8 OS=Homo sapiens GN=PCDHA8 PE=2 SV=1 - [PCDA8_HUMAN]
	330	Q9Y2H6	Fibronectin type-III domain-containing protein 3A OS=Homo sapiens GN=FNDC3A PE=1 SV=4 - [FND3A_HUMAN]
	331	O60506	Heterogeneous nuclear ribonucleoprotein Q OS=Homo sapiens GN=SYNCRIP PE=1 SV=2 - [HNRPQ_HUMAN]
	332	Q9BSK1-2	Isoform 2 of Zinc finger protein 577 OS=Homo sapiens GN=ZNF577 - [ZN577_HUMAN]
	333	P31749	RAC-alpha serine/threonine-protein kinase OS=Homo sapiens GN=AKT1 PE=1 SV=2 - [AKT1_HUMAN]
	334	P36871-2	Isoform 2 of Phosphoglucomutase-1 OS=Homo sapiens GN=PGM1 - [PGM1_HUMAN]
	335	H7BZ55	Putative ciliary rootlet coiled-coil protein-like 3 protein OS=Homo sapiens PE=5 SV=2 - [CROL3_HUMAN]
	336	P53355	Death-associated protein kinase 1 OS=Homo sapiens GN=DAPK1 PE=1 SV=6 - [DAPK1_HUMAN]
	337	O75643	U5 small nuclear ribonucleoprotein 200 kDa helicase OS=Homo sapiens GN=SNRNP200 PE=1 SV=2 - [U520_HUMAN]
	338	Q5TA50	Ceramide-1-phosphate transfer protein OS=Homo sapiens GN=GLTPD1 PE=1 SV=1 - [CPTP_HUMAN]
	339	Q9Y6M7-13	Isoform 13 of Sodium bicarbonate cotransporter 3 OS=Homo sapiens GN=SLC4A7 - [S4A7_HUMAN]
	340	Q9P2D7	Dynein heavy chain 1, axonemal OS=Homo sapiens GN=DNAH1 PE=2 SV=4 - [DYH1_HUMAN]
	341	O15244	Solute carrier family 22 member 2 OS=Homo sapiens GN=SLC22A2 PE=1 SV=2 - [S22A2_HUMAN]
	342	P25445	Tumor necrosis factor receptor superfamily member 6 OS=Homo sapiens GN=FAS PE=1 SV=1 - [TNR6_HUMAN]
	343	O75334-6	Isoform 6 of Liprin-alpha-2 OS=Homo sapiens GN=PPFIA2 - [LIPA2_HUMAN]
	344	Q9H0X9	Oxysterol-binding protein-related protein 5 OS=Homo sapiens GN=OSBPL5 PE=1 SV=1 - [OSBL5_HUMAN]
	345	Q9NZ20	Group 3 secretory phospholipase A2 OS=Homo sapiens GN=PLA2G3 PE=1 SV=2 - [PA2G3_HUMAN]
	346	P57679	Ellis-van Creveld syndrome protein OS=Homo sapiens GN=EVC PE=1 SV=1 - [EVC_HUMAN]
	347	Q9Y570-3	Isoform 3 of Protein phosphatase methylesterase 1 OS=Homo sapiens GN=PPME1 - [PPME1_HUMAN]
	348	Q9H1X3-3	Isoform 3 of DnaJ homolog subfamily C member 25 OS=Homo sapiens GN=DNAJC25 - [DJC25_HUMAN]
	349	Q8TBF5-2	Isoform 2 of Phosphatidylinositol-glycan biosynthesis class X protein OS=Homo sapiens GN=PIGX - [PIGX_HUMAN]
	350	Q96LJ8	UBX domain-containing protein 10 OS=Homo sapiens GN=UBXN10 PE=2 SV=1 - [UBX10_HUMAN]
	351	Q9Y233-2	Isoform PDE10A2 of cAMP and cAMP-inhibited cGMP 3',5'-cyclic phosphodiesterase 10A OS=Homo sapiens GN=PDE10A - [PDE10_HUMAN]
	352	Q9UK61-4	Isoform 4 of Protein FAM208A OS=Homo sapiens GN=FAM208A - [F208A_HUMAN]
	353	P0C7U0	Protein ELFN1 OS=Homo sapiens GN=ELFN1 PE=1 SV=2 - [ELFN1_HUMAN]
	354	Q9Y618	Nuclear receptor corepressor 2 OS=Homo sapiens GN=NCOR2 PE=1 SV=2 - [NCOR2_HUMAN]
	355	Q8NEN0	Armadillo repeat-containing protein 2 OS=Homo sapiens GN=ARMC2 PE=2 SV=4 - [ARMC2_HUMAN]
	356	Q6P9A2-2	Isoform 2 of Polypeptide N-acetylgalactosaminyltransferase 18 OS=Homo sapiens GN=GALNT18 - [GLT18_HUMAN]
	357	Q15173-2	Isoform Beta-2 of Serine/threonine-protein phosphatase 2A 56 kDa regulatory subunit beta isoform OS=Homo sapiens GN=PPP2R5B - [2A5B_HUMAN]
	358	Q969V3	Nicalin OS=Homo sapiens GN=NCLN PE=1 SV=2 - [NCLN_HUMAN]
	359	P58557-4	Isoform D of Putative ribonuclease OS=Homo sapiens GN=YBEY - [YBEY_HUMAN]
	360	Q6ZRS4-4	Isoform 4 of Coiled-coil domain-containing protein 129 OS=Homo sapiens GN=CCDC129 - [CC129_HUMAN]
	361	Q6ZNJ1-3	Isoform 3 of Neurobeachin-like protein 2 OS=Homo sapiens GN=NBEAL2 - [NBEL2_HUMAN]
	362	Q562F6-2	Isoform 2 of Shugoshin-like 2 OS=Homo sapiens GN=SGOL2 - [SGOL2_HUMAN]
	363	Q15111	Inactive phospholipase C-like protein 1 OS=Homo sapiens GN=PLCL1 PE=1 SV=3 - [PLCL1_HUMAN]
	364	P29374-2	Isoform II of AT-rich interactive domain-containing protein 4A OS=Homo sapiens GN=ARID4A - [ARI4A_HUMAN]
	365	O75366-2	Isoform 2 of Advillin OS=Homo sapiens GN=AVIL - [AVIL_HUMAN]
	366	Q9Y2K3	Myosin-15 OS=Homo sapiens GN=MYH15 PE=1 SV=5 - [MYH15_HUMAN]
	367	P28290-3	Isoform 3 of Sperm-specific antigen 2 OS=Homo sapiens GN=SSFA2 - [SSFA2_HUMAN]
	368	Q9HBH5	Retinol dehydrogenase 14 OS=Homo sapiens GN=RDH14 PE=1 SV=1 - [RDH14_HUMAN]
	369	Q96T76-8	Isoform 5 of MMS19 nucleotide excision repair protein homolog OS=Homo sapiens GN=MMS19 - [MMS19_HUMAN]
	370	Q96IC2	Putative RNA exonuclease NEF-sp OS=Homo sapiens GN=44M2.3 PE=2 SV=1 - [REXON_HUMAN]
	371	A3KMH1-3	Isoform 3 of von Willebrand factor A domain-containing protein 8 OS=Homo sapiens GN=VWA8 - [VWA8_HUMAN]
	372	P55082-2	Isoform 2 of Microfibril-associated glycoprotein 3 OS=Homo sapiens GN=MFAP3 - [MFAP3_HUMAN]
	373	P47989	Xanthine dehydrogenase/oxidase OS=Homo sapiens GN=XDH PE=1 SV=4 - [XDH_HUMAN]
	374	Q9NVI1-2	Isoform 2 of Fanconi anemia group I protein OS=Homo sapiens GN=FANCI - [FANCI_HUMAN]
	375	A6NKF1	SAC3 domain-containing protein 1 OS=Homo sapiens GN=SAC3D1 PE=1 SV=2 - [SAC31_HUMAN]
	376	Q99798	Aconitate hydratase, mitochondrial OS=Homo sapiens GN=ACO2 PE=1 SV=2 - [ACON_HUMAN]
	377	P21817	Ryanodine receptor 1 OS=Homo sapiens GN=RYR1 PE=1 SV=3 - [RYR1_HUMAN]
	378	Q9UI09	NADH dehydrogenase [ubiquinone] 1 alpha subcomplex subunit 12 OS=Homo sapiens GN=NDUFA12 PE=1 SV=1 - [NDUAC_HUMAN]
	379	Q96LP2	Protein FAM81B OS=Homo sapiens GN=FAM81B PE=2 SV=3 - [FA81B_HUMAN]
	380	P15884-7	Isoform G- of Transcription factor 4 OS=Homo sapiens GN=TCF4 - [ITF2_HUMAN]
	381	P21246	Pleiotrophin OS=Homo sapiens GN=PTN PE=1 SV=1 - [PTN_HUMAN]
	382	Q7Z736	Pleckstrin homology domain-containing family H member 3 OS=Homo sapiens GN=PLEKHH3 PE=1 SV=2 - [PKHH3_HUMAN]
	383	Q8NH06	Olfactory receptor 1P1 OS=Homo sapiens GN=OR1P1 PE=2 SV=2 - [OR1P1_HUMAN]
	384	Q9UL41-2	Isoform 2 of Paraneoplastic antigen Ma3 OS=Homo sapiens GN=PNMA3 - [PNMA3_HUMAN]
	385	Q9P2D8-3	Isoform 3 of Protein unc-79 homolog OS=Homo sapiens GN=UNC79 - [UNC79_HUMAN]
	386	Q96HE7	ERO1-like protein alpha OS=Homo sapiens GN=ERO1L PE=1 SV=2 - [ERO1A_HUMAN]
	387	Q8NE63	Homeodomain-interacting protein kinase 4 OS=Homo sapiens GN=HIPK4 PE=2 SV=1 - [HIPK4_HUMAN]
	388	Q8NDH2	Coiled-coil domain-containing protein 168 OS=Homo sapiens GN=CCDC168 PE=2 SV=2 - [CC168_HUMAN]
	389	P0C7V5	Putative zinc finger protein 812 OS=Homo sapiens GN=ZNF812 PE=5 SV=1 - [ZN812_HUMAN]
	390	Q9NXL2-2	Isoform 2 of Rho guanine nucleotide exchange factor 38 OS=Homo sapiens GN=ARHGEF38 - [ARH38_HUMAN]
	391	Q14141	Septin-6 OS=Homo sapiens GN=SEPT6 PE=1 SV=4 - [SEPT6_HUMAN]
	392	Q02297	Pro-neuregulin-1, membrane-bound isoform OS=Homo sapiens GN=NRG1 PE=1 SV=3 - [NRG1_HUMAN]
	393	P28827	Receptor-type tyrosine-protein phosphatase mu OS=Homo sapiens GN=PTPRM PE=1 SV=2 - [PTPRM_HUMAN]
	394	Q8WZ94	Olfactory receptor 5P3 OS=Homo sapiens GN=OR5P3 PE=2 SV=1 - [OR5P3_HUMAN]
	395	Q569K4-3	Isoform 3 of Zinc finger protein 385B OS=Homo sapiens GN=ZNF385B - [Z385B_HUMAN]
	396	Q14571	Inositol 1,4,5-trisphosphate receptor type 2 OS=Homo sapiens GN=ITPR2 PE=1 SV=2 - [ITPR2_HUMAN]
	397	P31327	Carbamoyl-phosphate synthase [ammonia], mitochondrial OS=Homo sapiens GN=CPS1 PE=1 SV=2 - [CPSM_HUMAN]
	398	P08237-3	Isoform 3 of 6-phosphofructokinase, muscle type OS=Homo sapiens GN=PFKM - [K6PF_HUMAN]
	399	Q8WV44	E3 ubiquitin-protein ligase TRIM41 OS=Homo sapiens GN=TRIM41 PE=1 SV=3 - [TRI41_HUMAN]
	400	Q96RE9	Zinc finger protein 300 OS=Homo sapiens GN=ZNF300 PE=2 SV=1 - [ZN300_HUMAN]
	401	O60518	Ran-binding protein 6 OS=Homo sapiens GN=RANBP6 PE=1 SV=2 - [RNBP6_HUMAN]
	402	P19367-3	Isoform 3 of Hexokinase-1 OS=Homo sapiens GN=HK1 - [HXK1_HUMAN]
	403	Q8N5V2	Ephexin-1 OS=Homo sapiens GN=NGEF PE=2 SV=2 - [NGEF_HUMAN]
	404	O95521	PRAME family member 1 OS=Homo sapiens GN=PRAMEF1 PE=2 SV=2 - [PRAM1_HUMAN]
	405	Q96GW7	Brevican core protein OS=Homo sapiens GN=BCAN PE=1 SV=2 - [PGCB_HUMAN]
	406	Q9Y4F5	Centrosomal protein of 170 kDa protein B OS=Homo sapiens GN=CEP170B PE=1 SV=4 - [C170B_HUMAN]
	407	Q69YW2	Uncharacterized membrane protein C1orf95 OS=Homo sapiens GN=C1orf95 PE=2 SV=1 - [CA095_HUMAN]
	408	Q9H0M0-3	Isoform 3 of NEDD4-like E3 ubiquitin-protein ligase WWP1 OS=Homo sapiens GN=WWP1 - [WWP1_HUMAN]
	409	Q96JX3	Protein SERAC1 OS=Homo sapiens GN=SERAC1 PE=1 SV=1 - [SRAC1_HUMAN]
	410	P98164	Low-density lipoprotein receptor-related protein 2 OS=Homo sapiens GN=LRP2 PE=1 SV=3 - [LRP2_HUMAN]
	411	Q9Y5G1	Protocadherin gamma-B3 OS=Homo sapiens GN=PCDHGB3 PE=2 SV=3 - [PCDGF_HUMAN]
	412	Q96BY6-3	Isoform 3 of Dedicator of cytokinesis protein 10 OS=Homo sapiens GN=DOCK10 - [DOC10_HUMAN]
	413	P08567	Pleckstrin OS=Homo sapiens GN=PLEK PE=1 SV=3 - [PLEK_HUMAN]
	414	Q9H3Z4	DnaJ homolog subfamily C member 5 OS=Homo sapiens GN=DNAJC5 PE=1 SV=1 - [DNJC5_HUMAN]
	415	Q9H093	NUAK family SNF1-like kinase 2 OS=Homo sapiens GN=NUAK2 PE=1 SV=1 - [NUAK2_HUMAN]
	416	B5ME19	Eukaryotic translation initiation factor 3 subunit C-like protein OS=Homo sapiens GN=EIF3CL PE=2 SV=1 - [EIFCL_HUMAN]
	417	P02549	Spectrin alpha chain, erythrocytic 1 OS=Homo sapiens GN=SPTA1 PE=1 SV=5 - [SPTA1_HUMAN]
	418	O43581-2	Isoform 2 of Synaptotagmin-7 OS=Homo sapiens GN=SYT7 - [SYT7_HUMAN]
	419	P49959	Double-strand break repair protein MRE11A OS=Homo sapiens GN=MRE11A PE=1 SV=3 - [MRE11_HUMAN]
	420	Q8WWL7	G2/mitotic-specific cyclin-B3 OS=Homo sapiens GN=CCNB3 PE=1 SV=2 - [CCNB3_HUMAN]
	421	O15072	A disintegrin and metalloproteinase with thrombospondin motifs 3 OS=Homo sapiens GN=ADAMTS3 PE=2 SV=4 - [ATS3_HUMAN]
	422	Q8TB73	Protein NDNF OS=Homo sapiens GN=NDNF PE=2 SV=2 - [NDNF_HUMAN]
	423	Q68DI1	Zinc finger protein 776 OS=Homo sapiens GN=ZNF776 PE=2 SV=2 - [ZN776_HUMAN]
	424	Q16531	DNA damage-binding protein 1 OS=Homo sapiens GN=DDB1 PE=1 SV=1 - [DDB1_HUMAN]
	425	P80303	Nucleobindin-2 OS=Homo sapiens GN=NUCB2 PE=1 SV=2 - [NUCB2_HUMAN]
	426	Q9BUB4	tRNA-specific adenosine deaminase 1 OS=Homo sapiens GN=ADAT1 PE=1 SV=1 - [ADAT1_HUMAN]
	427	Q9Y6J8	Serine/threonine/tyrosine-interacting-like protein 1 OS=Homo sapiens GN=STYXL1 PE=2 SV=1 - [STYL1_HUMAN]
	428	Q6NXP0	EF-hand calcium-binding domain-containing protein 12 OS=Homo sapiens GN=EFCAB12 PE=2 SV=1 - [EFC12_HUMAN]
	429	Q2M3V2	Ankyrin repeat domain-containing protein SOWAHA OS=Homo sapiens GN=SOWAHA PE=1 SV=3 - [SWAHA_HUMAN]
	430	Q96JB1-2	Isoform 2 of Dynein heavy chain 8, axonemal OS=Homo sapiens GN=DNAH8 - [DYH8_HUMAN]
	431	P14616	Insulin receptor-related protein OS=Homo sapiens GN=INSRR PE=1 SV=2 - [INSRR_HUMAN]
	432	Q14139	Ubiquitin conjugation factor E4 A OS=Homo sapiens GN=UBE4A PE=1 SV=2 - [UBE4A_HUMAN]
	433	Q15303-4	Isoform JM-B CYT-2 of Receptor tyrosine-protein kinase erbB-4 OS=Homo sapiens GN=ERBB4 - [ERBB4_HUMAN]
	434	P53621	Coatomer subunit alpha OS=Homo sapiens GN=COPA PE=1 SV=2 - [COPA_HUMAN]
	435	Q9P121-2	Isoform 2 of Neurotrimin OS=Homo sapiens GN=NTM - [NTRI_HUMAN]
	436	Q14498	RNA-binding protein 39 OS=Homo sapiens GN=RBM39 PE=1 SV=2 - [RBM39_HUMAN]
	437	Q12789-3	Isoform 2 of General transcription factor 3C polypeptide 1 OS=Homo sapiens GN=GTF3C1 - [TF3C1_HUMAN]
	438	O15042	U2 snRNP-associated SURP motif-containing protein OS=Homo sapiens GN=U2SURP PE=1 SV=2 - [SR140_HUMAN]
	439	Q86U86-8	Isoform 8 of Protein polybromo-1 OS=Homo sapiens GN=PBRM1 - [PB1_HUMAN]
	440	Q9UDR5	Alpha-aminoadipic semialdehyde synthase, mitochondrial OS=Homo sapiens GN=AASS PE=1 SV=1 - [AASS_HUMAN]
	441	Q13402-5	Isoform 5 of Unconventional myosin-VIIa OS=Homo sapiens GN=MYO7A - [MYO7A_HUMAN]
	442	Q2LD37-4	Isoform 4 of Uncharacterized protein KIAA1109 OS=Homo sapiens GN=KIAA1109 - [K1109_HUMAN]
	443	Q9UHW9-4	Isoform 4 of Solute carrier family 12 member 6 OS=Homo sapiens GN=SLC12A6 - [S12A6_HUMAN]
	444	Q8NGX2	Olfactory receptor 2T35 OS=Homo sapiens GN=OR2T35 PE=2 SV=1 - [O2T35_HUMAN]
	445	Q8TEJ3	SH3 domain-containing RING finger protein 3 OS=Homo sapiens GN=SH3RF3 PE=1 SV=2 - [SH3R3_HUMAN]
	446	O95347	Structural maintenance of chromosomes protein 2 OS=Homo sapiens GN=SMC2 PE=1 SV=2 - [SMC2_HUMAN]
	447	P56545-2	Isoform 2 of C-terminal-binding protein 2 OS=Homo sapiens GN=CTBP2 - [CTBP2_HUMAN]
	448	Q8IVT2	Mitotic interactor and substrate of PLK1 OS=Homo sapiens GN=MISP PE=1 SV=1 - [MISP_HUMAN]
	449	O75161	Nephrocystin-4 OS=Homo sapiens GN=NPHP4 PE=1 SV=2 - [NPHP4_HUMAN]
	450	Q7Z553	MAM domain-containing glycosylphosphatidylinositol anchor protein 2 OS=Homo sapiens GN=MDGA2 PE=2 SV=2 - [MDGA2_HUMAN]
	451	P28070	Proteasome subunit beta type-4 OS=Homo sapiens GN=PSMB4 PE=1 SV=4 - [PSB4_HUMAN]
	452	Q6ZMK1-3	Isoform 3 of Cysteine and histidine-rich protein 1 OS=Homo sapiens GN=CYHR1 - [CYHR1_HUMAN]
	453	Q70CQ2	Ubiquitin carboxyl-terminal hydrolase 34 OS=Homo sapiens GN=USP34 PE=1 SV=2 - [UBP34_HUMAN]
	454	P30679	Guanine nucleotide-binding protein subunit alpha-15 OS=Homo sapiens GN=GNA15 PE=1 SV=2 - [GNA15_HUMAN]
	455	Q15746-6	Isoform Del-1790 of Myosin light chain kinase, smooth muscle OS=Homo sapiens GN=MYLK - [MYLK_HUMAN]
	456	Q9NSD9	Phenylalanine--tRNA ligase beta subunit OS=Homo sapiens GN=FARSB PE=1 SV=3 - [SYFB_HUMAN]
	457	Q5QJE6	Deoxynucleotidyltransferase terminal-interacting protein 2 OS=Homo sapiens GN=DNTTIP2 PE=1 SV=2 - [TDIF2_HUMAN]
	458	P84550	SKI family transcriptional corepressor 1 OS=Homo sapiens GN=SKOR1 PE=1 SV=1 - [SKOR1_HUMAN]
	459	P35504	UDP-glucuronosyltransferase 1-5 OS=Homo sapiens GN=UGT1A5 PE=2 SV=1 - [UD15_HUMAN]
	460	Q92620	Pre-mRNA-splicing factor ATP-dependent RNA helicase PRP16 OS=Homo sapiens GN=DHX38 PE=1 SV=2 - [PRP16_HUMAN]
	461	Q02880	DNA topoisomerase 2-beta OS=Homo sapiens GN=TOP2B PE=1 SV=3 - [TOP2B_HUMAN]
	462	P12645	Bone morphogenetic protein 3 OS=Homo sapiens GN=BMP3 PE=1 SV=2 - [BMP3_HUMAN]
	463	Q7Z7A1-5	Isoform 5 of Centriolin OS=Homo sapiens GN=CNTRL - [CNTRL_HUMAN]
	464	Q96T51-3	Isoform 3 of RUN and FYVE domain-containing protein 1 OS=Homo sapiens GN=RUFY1 - [RUFY1_HUMAN]
	465	Q7Z6K1	THAP domain-containing protein 5 OS=Homo sapiens GN=THAP5 PE=1 SV=2 - [THAP5_HUMAN]
	466	O43909	Exostosin-like 3 OS=Homo sapiens GN=EXTL3 PE=1 SV=1 - [EXTL3_HUMAN]
	467	Q13683-10	Isoform Alpha-7X1X2A of Integrin alpha-7 OS=Homo sapiens GN=ITGA7 - [ITA7_HUMAN]
	468	Q15058	Kinesin-like protein KIF14 OS=Homo sapiens GN=KIF14 PE=1 SV=1 - [KIF14_HUMAN]
	469	Q4G0T1	Putative scavenger receptor cysteine-rich domain-containing protein LOC619207 OS=Homo sapiens PE=5 SV=2 - [SRCRM_HUMAN]
	470	Q9Y2G0	Protein EFR3 homolog B OS=Homo sapiens GN=EFR3B PE=1 SV=2 - [EFR3B_HUMAN]
	471	Q6ZS86-2	Isoform 2 of Putative glycerol kinase 5 OS=Homo sapiens GN=GK5 - [GLPK5_HUMAN]
	472	Q96SN8-3	Isoform 3 of CDK5 regulatory subunit-associated protein 2 OS=Homo sapiens GN=CDK5RAP2 - [CK5P2_HUMAN]
	473	Q93084-6	Isoform SERCA3D of Sarcoplasmic/endoplasmic reticulum calcium ATPase 3 OS=Homo sapiens GN=ATP2A3 - [AT2A3_HUMAN]
	474	P36915	Guanine nucleotide-binding protein-like 1 OS=Homo sapiens GN=GNL1 PE=1 SV=2 - [GNL1_HUMAN]
	475	O00267-2	Isoform 2 of Transcription elongation factor SPT5 OS=Homo sapiens GN=SUPT5H - [SPT5H_HUMAN]
	476	Q86W50	Methyltransferase-like protein 16 OS=Homo sapiens GN=METTL16 PE=1 SV=2 - [MET16_HUMAN]
	477	Q6NUS6-3	Isoform 3 of Tectonic-3 OS=Homo sapiens GN=TCTN3 - [TECT3_HUMAN]
	478	Q6ZRI8-4	Isoform 4 of Rho GTPase-activating protein 36 OS=Homo sapiens GN=ARHGAP36 - [RHG36_HUMAN]
	479	Q9Y6A1-2	Isoform 2 of Protein O-mannosyl-transferase 1 OS=Homo sapiens GN=POMT1 - [POMT1_HUMAN]
	480	Q9Y2D5-6	Isoform 4 of A-kinase anchor protein 2 OS=Homo sapiens GN=AKAP2 - [AKAP2_HUMAN]
	481	Q8TE59	A disintegrin and metalloproteinase with thrombospondin motifs 19 OS=Homo sapiens GN=ADAMTS19 PE=2 SV=2 - [ATS19_HUMAN]
	482	Q9ULT8	E3 ubiquitin-protein ligase HECTD1 OS=Homo sapiens GN=HECTD1 PE=1 SV=3 - [HECD1_HUMAN]
	483	Q9ULM3	YEATS domain-containing protein 2 OS=Homo sapiens GN=YEATS2 PE=1 SV=2 - [YETS2_HUMAN]
	484	Q8NB25-3	Isoform 3 of Protein FAM184A OS=Homo sapiens GN=FAM184A - [F184A_HUMAN]
	485	Q13332-3	Isoform PTPS-MEB of Receptor-type tyrosine-protein phosphatase S OS=Homo sapiens GN=PTPRS - [PTPRS_HUMAN]
	486	Q92729-4	Isoform 4 of Receptor-type tyrosine-protein phosphatase U OS=Homo sapiens GN=PTPRU - [PTPRU_HUMAN]
	487	Q86VV8	Rotatin OS=Homo sapiens GN=RTTN PE=1 SV=3 - [RTTN_HUMAN]
	488	Q9Y4I1-3	Isoform 3 of Unconventional myosin-Va OS=Homo sapiens GN=MYO5A - [MYO5A_HUMAN]
	489	Q7Z6J8	E3 ubiquitin-protein ligase E3D OS=Homo sapiens GN=UBE3D PE=1 SV=2 - [UBE3D_HUMAN]
	490	P29120-2	Isoform 2 of Neuroendocrine convertase 1 OS=Homo sapiens GN=PCSK1 - [NEC1_HUMAN]
	491	Q2M1Z3	Rho GTPase-activating protein 31 OS=Homo sapiens GN=ARHGAP31 PE=1 SV=2 - [RHG31_HUMAN]
	492	Q63HN8-4	Isoform 2 of E3 ubiquitin-protein ligase RNF213 OS=Homo sapiens GN=RNF213 - [RN213_HUMAN]
	493	Q7RTY5	Serine protease 48 OS=Homo sapiens GN=PRSS48 PE=2 SV=2 - [PRS48_HUMAN]
	494	Q15139	Serine/threonine-protein kinase D1 OS=Homo sapiens GN=PRKD1 PE=1 SV=2 - [KPCD1_HUMAN]
	495	Q96DT5	Dynein heavy chain 11, axonemal OS=Homo sapiens GN=DNAH11 PE=1 SV=3 - [DYH11_HUMAN]
	496	P01266	Thyroglobulin OS=Homo sapiens GN=TG PE=1 SV=5 - [THYG_HUMAN]
	497	Q13190	Syntaxin-5 OS=Homo sapiens GN=STX5 PE=1 SV=2 - [STX5_HUMAN]
	498	Q9P2D1	Chromodomain-helicase-DNA-binding protein 7 OS=Homo sapiens GN=CHD7 PE=1 SV=3 - [CHD7_HUMAN]
	499	P10721	Mast/stem cell growth factor receptor Kit OS=Homo sapiens GN=KIT PE=1 SV=1 - [KIT_HUMAN]
	500	P49643	DNA primase large subunit OS=Homo sapiens GN=PRIM2 PE=1 SV=2 - [PRI2_HUMAN]
	501	Q02962	Paired box protein Pax-2 OS=Homo sapiens GN=PAX2 PE=1 SV=4 - [PAX2_HUMAN]
	502	O60422	One cut domain family member 3 OS=Homo sapiens GN=ONECUT3 PE=2 SV=2 - [ONEC3_HUMAN]
	503	O14745	Na(+)/H(+) exchange regulatory cofactor NHE-RF1 OS=Homo sapiens GN=SLC9A3R1 PE=1 SV=4 - [NHRF1_HUMAN]
	504	Q96PE2	Rho guanine nucleotide exchange factor 17 OS=Homo sapiens GN=ARHGEF17 PE=1 SV=1 - [ARHGH_HUMAN]
	505	O00311	Cell division cycle 7-related protein kinase OS=Homo sapiens GN=CDC7 PE=1 SV=1 - [CDC7_HUMAN]
	506	Q68D10-2	Isoform 2 of Protein SPT2 homolog OS=Homo sapiens GN=SPTY2D1 - [SPT2_HUMAN]
	507	O14974	Protein phosphatase 1 regulatory subunit 12A OS=Homo sapiens GN=PPP1R12A PE=1 SV=1 - [MYPT1_HUMAN]
	508	O43837-2	Isoform A of Isocitrate dehydrogenase [NAD] subunit beta, mitochondrial OS=Homo sapiens GN=IDH3B - [IDH3B_HUMAN]
	509	Q8TF17	SH3 domain and tetratricopeptide repeat-containing protein 2 OS=Homo sapiens GN=SH3TC2 PE=1 SV=2 - [S3TC2_HUMAN]
	510	Q8IY22	C-Maf-inducing protein OS=Homo sapiens GN=CMIP PE=1 SV=3 - [CMIP_HUMAN]
	511	Q8NDZ2	SUMO-interacting motif-containing protein 1 OS=Homo sapiens GN=SIMC1 PE=1 SV=3 - [SIMC1_HUMAN]
	512	Q5MNZ9-2	Isoform 2 of WD repeat domain phosphoinositide-interacting protein 1 OS=Homo sapiens GN=WIPI1 - [WIPI1_HUMAN]
	513	Q9Y210-3	Isoform 3 of Short transient receptor potential channel 6 OS=Homo sapiens GN=TRPC6 - [TRPC6_HUMAN]
	514	Q8N4C6-7	Isoform 7 of Ninein OS=Homo sapiens GN=NIN - [NIN_HUMAN]
	515	P47871	Glucagon receptor OS=Homo sapiens GN=GCGR PE=1 SV=1 - [GLR_HUMAN]
	516	Q16821	Protein phosphatase 1 regulatory subunit 3A OS=Homo sapiens GN=PPP1R3A PE=1 SV=3 - [PPR3A_HUMAN]
	517	O00421-2	Isoform 2 of C-C chemokine receptor-like 2 OS=Homo sapiens GN=CCRL2 - [CCRL2_HUMAN]
	518	Q14847	LIM and SH3 domain protein 1 OS=Homo sapiens GN=LASP1 PE=1 SV=2 - [LASP1_HUMAN]
	519	Q14676	Mediator of DNA damage checkpoint protein 1 OS=Homo sapiens GN=MDC1 PE=1 SV=3 - [MDC1_HUMAN]
	520	Q9NUT2	ATP-binding cassette sub-family B member 8, mitochondrial OS=Homo sapiens GN=ABCB8 PE=1 SV=3 - [ABCB8_HUMAN]
	521	Q9P203	BTB/POZ domain-containing protein 7 OS=Homo sapiens GN=BTBD7 PE=1 SV=3 - [BTBD7_HUMAN]
	522	Q96P70	Importin-9 OS=Homo sapiens GN=IPO9 PE=1 SV=3 - [IPO9_HUMAN]
	523	O15460-2	Isoform IIa of Prolyl 4-hydroxylase subunit alpha-2 OS=Homo sapiens GN=P4HA2 - [P4HA2_HUMAN]
	524	Q9HAZ2-3	Isoform 3 of PR domain zinc finger protein 16 OS=Homo sapiens GN=PRDM16 - [PRD16_HUMAN]
	525	Q9H0J4	Glutamine-rich protein 2 OS=Homo sapiens GN=QRICH2 PE=1 SV=1 - [QRIC2_HUMAN]
	526	Q8TE73	Dynein heavy chain 5, axonemal OS=Homo sapiens GN=DNAH5 PE=1 SV=3 - [DYH5_HUMAN]
	527	P33981	Dual specificity protein kinase TTK OS=Homo sapiens GN=TTK PE=1 SV=2 - [TTK_HUMAN]
	528	P62837	Ubiquitin-conjugating enzyme E2 D2 OS=Homo sapiens GN=UBE2D2 PE=1 SV=1 - [UB2D2_HUMAN]
	529	Q9NUM4	Transmembrane protein 106B OS=Homo sapiens GN=TMEM106B PE=1 SV=2 - [T106B_HUMAN]
	530	Q9NT68	Teneurin-2 OS=Homo sapiens GN=TENM2 PE=1 SV=3 - [TEN2_HUMAN]
	531	Q0VDD8-4	Isoform 4 of Dynein heavy chain 14, axonemal OS=Homo sapiens GN=DNAH14 - [DYH14_HUMAN]
	532	Q6ZNL6	FYVE, RhoGEF and PH domain-containing protein 5 OS=Homo sapiens GN=FGD5 PE=1 SV=3 - [FGD5_HUMAN]
	533	Q9Y5P8	Serine/threonine-protein phosphatase 2A regulatory subunit B'' subunit beta OS=Homo sapiens GN=PPP2R3B PE=1 SV=2 - [P2R3B_HUMAN]
	534	O15173	Membrane-associated progesterone receptor component 2 OS=Homo sapiens GN=PGRMC2 PE=1 SV=1 - [PGRC2_HUMAN]
	535	Q8NI60	Chaperone activity of bc1 complex-like, mitochondrial OS=Homo sapiens GN=ADCK3 PE=1 SV=1 - [ADCK3_HUMAN]
	536	A2RRH5-4	Isoform 4 of WD repeat-containing protein 27 OS=Homo sapiens GN=WDR27 - [WDR27_HUMAN]
	537	O75843	AP-1 complex subunit gamma-like 2 OS=Homo sapiens GN=AP1G2 PE=1 SV=1 - [AP1G2_HUMAN]
	538	O95180-2	Isoform 2 of Voltage-dependent T-type calcium channel subunit alpha-1H OS=Homo sapiens GN=CACNA1H - [CAC1H_HUMAN]
	539	Q13596-3	Isoform 3 of Sorting nexin-1 OS=Homo sapiens GN=SNX1 - [SNX1_HUMAN]
	540	Q9NY57-2	Isoform 2 of Serine/threonine-protein kinase 32B OS=Homo sapiens GN=STK32B - [ST32B_HUMAN]
	541	Q04726-4	Isoform 4 of Transducin-like enhancer protein 3 OS=Homo sapiens GN=TLE3 - [TLE3_HUMAN]
	542	P35749-2	Isoform 2 of Myosin-11 OS=Homo sapiens GN=MYH11 - [MYH11_HUMAN]
	543	O43396	Thioredoxin-like protein 1 OS=Homo sapiens GN=TXNL1 PE=1 SV=3 - [TXNL1_HUMAN]
	544	Q9UHB7	AF4/FMR2 family member 4 OS=Homo sapiens GN=AFF4 PE=1 SV=1 - [AFF4_HUMAN]
	545	O60294	Leucine carboxyl methyltransferase 2 OS=Homo sapiens GN=LCMT2 PE=1 SV=3 - [LCMT2_HUMAN]
	546	P13807-2	Isoform 2 of Glycogen [starch] synthase, muscle OS=Homo sapiens GN=GYS1 - [GYS1_HUMAN]
	547	Q969H8	UPF0556 protein C19orf10 OS=Homo sapiens GN=C19orf10 PE=1 SV=1 - [CS010_HUMAN]
	548	O15528	25-hydroxyvitamin D-1 alpha hydroxylase, mitochondrial OS=Homo sapiens GN=CYP27B1 PE=1 SV=1 - [CP27B_HUMAN]
	549	P23467-3	Isoform 3 of Receptor-type tyrosine-protein phosphatase beta OS=Homo sapiens GN=PTPRB - [PTPRB_HUMAN]
	550	Q86T29-2	Isoform 2 of Zinc finger protein 605 OS=Homo sapiens GN=ZNF605 - [ZN605_HUMAN]
	551	Q9Y2P7	Zinc finger protein 256 OS=Homo sapiens GN=ZNF256 PE=1 SV=2 - [ZN256_HUMAN]
	552	Q9NYQ8	Protocadherin Fat 2 OS=Homo sapiens GN=FAT2 PE=1 SV=2 - [FAT2_HUMAN]
	553	P20908	Collagen alpha-1(V) chain OS=Homo sapiens GN=COL5A1 PE=1 SV=3 - [CO5A1_HUMAN]
	554	Q9H2G2	STE20-like serine/threonine-protein kinase OS=Homo sapiens GN=SLK PE=1 SV=1 - [SLK_HUMAN]
	555	Q86TU7	Histone-lysine N-methyltransferase setd3 OS=Homo sapiens GN=SETD3 PE=1 SV=1 - [SETD3_HUMAN]
	556	Q5SRE5-2	Isoform 2 of Nucleoporin NUP188 homolog OS=Homo sapiens GN=NUP188 - [NU188_HUMAN]
	557	Q9NYC9	Dynein heavy chain 9, axonemal OS=Homo sapiens GN=DNAH9 PE=1 SV=3 - [DYH9_HUMAN]
	558	Q8N2B8	Putative uncharacterized protein FLJ33534 OS=Homo sapiens PE=2 SV=1 - [YB035_HUMAN]
	559	Q9Y2Q0	Probable phospholipid-transporting ATPase IA OS=Homo sapiens GN=ATP8A1 PE=1 SV=1 - [AT8A1_HUMAN]
	560	Q9NZN8	CCR4-NOT transcription complex subunit 2 OS=Homo sapiens GN=CNOT2 PE=1 SV=1 - [CNOT2_HUMAN]
	561	Q9H8H2	Probable ATP-dependent RNA helicase DDX31 OS=Homo sapiens GN=DDX31 PE=1 SV=2 - [DDX31_HUMAN]
	562	P23368	NAD-dependent malic enzyme, mitochondrial OS=Homo sapiens GN=ME2 PE=1 SV=1 - [MAOM_HUMAN]
	563	Q14692	Ribosome biogenesis protein BMS1 homolog OS=Homo sapiens GN=BMS1 PE=1 SV=1 - [BMS1_HUMAN]
	564	Q5SQI0-3	Isoform 3 of Alpha-tubulin N-acetyltransferase OS=Homo sapiens GN=ATAT1 - [ATAT_HUMAN]
	565	Q9Y485	DmX-like protein 1 OS=Homo sapiens GN=DMXL1 PE=1 SV=3 - [DMXL1_HUMAN]
	566	Q9UNH5-5	Isoform 5 of Dual specificity protein phosphatase CDC14A OS=Homo sapiens GN=CDC14A - [CC14A_HUMAN]
	567	Q8WW22-2	Isoform 2 of DnaJ homolog subfamily A member 4 OS=Homo sapiens GN=DNAJA4 - [DNJA4_HUMAN]
	568	P04626	Receptor tyrosine-protein kinase erbB-2 OS=Homo sapiens GN=ERBB2 PE=1 SV=1 - [ERBB2_HUMAN]
	569	Q9H0H0	Integrator complex subunit 2 OS=Homo sapiens GN=INTS2 PE=1 SV=2 - [INT2_HUMAN]
	570	Q5T0W9	Protein FAM83B OS=Homo sapiens GN=FAM83B PE=1 SV=1 - [FA83B_HUMAN]
	571	P04114	Apolipoprotein B-100 OS=Homo sapiens GN=APOB PE=1 SV=2 - [APOB_HUMAN]
	572	P11836	B-lymphocyte antigen CD20 OS=Homo sapiens GN=MS4A1 PE=1 SV=1 - [CD20_HUMAN]
	573	Q9BT22	Chitobiosyldiphosphodolichol beta-mannosyltransferase OS=Homo sapiens GN=ALG1 PE=1 SV=2 - [ALG1_HUMAN]
	574	Q9BQ04	RNA-binding protein 4B OS=Homo sapiens GN=RBM4B PE=1 SV=1 - [RBM4B_HUMAN]
	575	Q9HCK1	DBF4-type zinc finger-containing protein 2 OS=Homo sapiens GN=ZDBF2 PE=1 SV=3 - [ZDBF2_HUMAN]
	576	Q8WUI4-8	Isoform 8 of Histone deacetylase 7 OS=Homo sapiens GN=HDAC7 - [HDAC7_HUMAN]
	577	Q5JWF8	Actin-like protein 10 OS=Homo sapiens GN=ACTL10 PE=2 SV=1 - [ACL10_HUMAN]
	578	Q13045	Protein flightless-1 homolog OS=Homo sapiens GN=FLII PE=1 SV=2 - [FLII_HUMAN]
	579	O75976	Carboxypeptidase D OS=Homo sapiens GN=CPD PE=1 SV=2 - [CBPD_HUMAN]
	580	Q9HCD6	Protein TANC2 OS=Homo sapiens GN=TANC2 PE=1 SV=3 - [TANC2_HUMAN]
	581	Q6ZSJ9	Protein shisa-6 homolog OS=Homo sapiens GN=SHISA6 PE=2 SV=2 - [SHSA6_HUMAN]
	582	P11274	Breakpoint cluster region protein OS=Homo sapiens GN=BCR PE=1 SV=2 - [BCR_HUMAN]
	583	P13535	Myosin-8 OS=Homo sapiens GN=MYH8 PE=1 SV=3 - [MYH8_HUMAN]
	584	P46019	Phosphorylase b kinase regulatory subunit alpha, liver isoform OS=Homo sapiens GN=PHKA2 PE=1 SV=1 - [KPB2_HUMAN]
	585	A0AVI2	Fer-1-like protein 5 OS=Homo sapiens GN=FER1L5 PE=2 SV=2 - [FR1L5_HUMAN]
	586	Q75QN2	Integrator complex subunit 8 OS=Homo sapiens GN=INTS8 PE=1 SV=1 - [INT8_HUMAN]
	587	Q8TBZ2	MYCBP-associated protein OS=Homo sapiens GN=MYCBPAP PE=1 SV=2 - [MYBPP_HUMAN]
	588	Q9H8E8	Cysteine-rich protein 2-binding protein OS=Homo sapiens GN=CSRP2BP PE=1 SV=3 - [CSR2B_HUMAN]
	589	Q9Y6E2	Basic leucine zipper and W2 domain-containing protein 2 OS=Homo sapiens GN=BZW2 PE=1 SV=1 - [BZW2_HUMAN]
	590	Q9HCM9	E3 ubiquitin-protein ligase TRIM39 OS=Homo sapiens GN=TRIM39 PE=1 SV=2 - [TRI39_HUMAN]
	591	Q96RW7	Hemicentin-1 OS=Homo sapiens GN=HMCN1 PE=1 SV=2 - [HMCN1_HUMAN]
	592	Q9NY33	Dipeptidyl peptidase 3 OS=Homo sapiens GN=DPP3 PE=1 SV=2 - [DPP3_HUMAN]
	593	O00139-4	Isoform 4 of Kinesin-like protein KIF2A OS=Homo sapiens GN=KIF2A - [KIF2A_HUMAN]
	594	O76094	Signal recognition particle subunit SRP72 OS=Homo sapiens GN=SRP72 PE=1 SV=3 - [SRP72_HUMAN]
	595	Q14690	Protein RRP5 homolog OS=Homo sapiens GN=PDCD11 PE=1 SV=3 - [RRP5_HUMAN]
	596	Q9BQL6	Fermitin family homolog 1 OS=Homo sapiens GN=FERMT1 PE=1 SV=1 - [FERM1_HUMAN]
	597	Q16576-2	Isoform 2 of Histone-binding protein RBBP7 OS=Homo sapiens GN=RBBP7 - [RBBP7_HUMAN]
	598	P10589	COUP transcription factor 1 OS=Homo sapiens GN=NR2F1 PE=1 SV=1 - [COT1_HUMAN]
	599	Q7Z392	Trafficking protein particle complex subunit 11 OS=Homo sapiens GN=TRAPPC11 PE=1 SV=2 - [TPC11_HUMAN]
	600	Q96LK8	Spermatogenesis-associated protein 32 OS=Homo sapiens GN=SPATA32 PE=1 SV=3 - [SPT32_HUMAN]
	601	O43913	Origin recognition complex subunit 5 OS=Homo sapiens GN=ORC5 PE=1 SV=1 - [ORC5_HUMAN]
	602	Q7Z406	Myosin-14 OS=Homo sapiens GN=MYH14 PE=1 SV=2 - [MYH14_HUMAN]
	603	Q96RP8	Potassium voltage-gated channel subfamily A member 7 OS=Homo sapiens GN=KCNA7 PE=2 SV=1 - [KCNA7_HUMAN]
	604	Q5TH69	Brefeldin A-inhibited guanine nucleotide-exchange protein 3 OS=Homo sapiens GN=ARFGEF3 PE=1 SV=3 - [BIG3_HUMAN]
	605	Q5TCX8	Mitogen-activated protein kinase kinase kinase MLK4 OS=Homo sapiens GN=MLK4 PE=1 SV=1 - [M3KL4_HUMAN]
	606	Q8N729	Neuropeptide W OS=Homo sapiens GN=NPW PE=1 SV=2 - [NPW_HUMAN]
	607	Q6ZUB1	Spermatogenesis-associated protein 31E1 OS=Homo sapiens GN=SPATA31E1 PE=2 SV=2 - [S31E1_HUMAN]
	608	Q2TAZ0	Autophagy-related protein 2 homolog A OS=Homo sapiens GN=ATG2A PE=1 SV=3 - [ATG2A_HUMAN]
	609	P0DKB5	Trophoblast glycoprotein-like OS=Homo sapiens GN=TPBGL PE=4 SV=1 - [TPBGL_HUMAN]
	610	Q9ULB1-3	Isoform 3a of Neurexin-1 OS=Homo sapiens GN=NRXN1 - [NRX1A_HUMAN]
	611	Q9P1Q0-4	Isoform 4 of Vacuolar protein sorting-associated protein 54 OS=Homo sapiens GN=VPS54 - [VPS54_HUMAN]
	612	P56524	Histone deacetylase 4 OS=Homo sapiens GN=HDAC4 PE=1 SV=3 - [HDAC4_HUMAN]
	613	Q7L3V2	Protein Bop OS=Homo sapiens GN=BOP PE=1 SV=1 - [BOP_HUMAN]
	614	O15355	Protein phosphatase 1G OS=Homo sapiens GN=PPM1G PE=1 SV=1 - [PPM1G_HUMAN]
	615	Q9ULW6	Nucleosome assembly protein 1-like 2 OS=Homo sapiens GN=NAP1L2 PE=2 SV=1 - [NP1L2_HUMAN]
	616	Q58WW2-3	Isoform 3 of DDB1- and CUL4-associated factor 6 OS=Homo sapiens GN=DCAF6 - [DCAF6_HUMAN]
	617	Q2PPJ7-2	Isoform 2 of Ral GTPase-activating protein subunit alpha-2 OS=Homo sapiens GN=RALGAPA2 - [RGPA2_HUMAN]
	618	O43683	Mitotic checkpoint serine/threonine-protein kinase BUB1 OS=Homo sapiens GN=BUB1 PE=1 SV=1 - [BUB1_HUMAN]
	619	A8MW99	Meiosis-specific protein MEI4-like OS=Homo sapiens GN=MEI4 PE=3 SV=1 - [MEI4L_HUMAN]
	620	Q7Z2Y5	Nik-related protein kinase OS=Homo sapiens GN=NRK PE=1 SV=2 - [NRK_HUMAN]
	621	Q92561	Phytanoyl-CoA hydroxylase-interacting protein OS=Homo sapiens GN=PHYHIP PE=1 SV=1 - [PHYIP_HUMAN]
	622	P51959	Cyclin-G1 OS=Homo sapiens GN=CCNG1 PE=1 SV=2 - [CCNG1_HUMAN]
	623	Q5ST30	Valine--tRNA ligase, mitochondrial OS=Homo sapiens GN=VARS2 PE=1 SV=2 - [SYVM_HUMAN]
	624	O60331-4	Isoform 4 of Phosphatidylinositol 4-phosphate 5-kinase type-1 gamma OS=Homo sapiens GN=PIP5K1C - [PI51C_HUMAN]
	625	O14646	Chromodomain-helicase-DNA-binding protein 1 OS=Homo sapiens GN=CHD1 PE=1 SV=2 - [CHD1_HUMAN]
	626	Q9UKK3	Poly [ADP-ribose] polymerase 4 OS=Homo sapiens GN=PARP4 PE=1 SV=3 - [PARP4_HUMAN]
	627	Q13535	Serine/threonine-protein kinase ATR OS=Homo sapiens GN=ATR PE=1 SV=3 - [ATR_HUMAN]
	628	Q96LT7	Protein C9orf72 OS=Homo sapiens GN=C9orf72 PE=1 SV=2 - [CI072_HUMAN]
	629	Q9BX84-2	Isoform TRPM6b of Transient receptor potential cation channel subfamily M member 6 OS=Homo sapiens GN=TRPM6 - [TRPM6_HUMAN]
	630	Q9HCE3	Zinc finger protein 532 OS=Homo sapiens GN=ZNF532 PE=1 SV=2 - [ZN532_HUMAN]
	631	Q96IQ9-2	Isoform 2 of Zinc finger protein 414 OS=Homo sapiens GN=ZNF414 - [ZN414_HUMAN]
	632	O60684	Importin subunit alpha-7 OS=Homo sapiens GN=KPNA6 PE=1 SV=1 - [IMA7_HUMAN]
	633	Q6P461-3	Isoform 3 of Acyl-coenzyme A synthetase ACSM6, mitochondrial OS=Homo sapiens GN=ACSM6 - [ACSM6_HUMAN]
	634	Q504Q3	PAB-dependent poly(A)-specific ribonuclease subunit 2 OS=Homo sapiens GN=PAN2 PE=1 SV=3 - [PAN2_HUMAN]
	635	P0C874	Putative spermatogenesis-associated protein 31D3 OS=Homo sapiens GN=SPATA31D3 PE=5 SV=1 - [S31D3_HUMAN]
	636	Q86SQ4-2	Isoform 2 of G-protein coupled receptor 126 OS=Homo sapiens GN=GPR126 - [GP126_HUMAN]
	637	Q5VTA0	PRAME family member 17 OS=Homo sapiens GN=PRAMEF17 PE=2 SV=1 - [PRA17_HUMAN]
	638	Q8TER5	Rho guanine nucleotide exchange factor 40 OS=Homo sapiens GN=ARHGEF40 PE=1 SV=3 - [ARH40_HUMAN]
	639	Q12774	Rho guanine nucleotide exchange factor 5 OS=Homo sapiens GN=ARHGEF5 PE=1 SV=3 - [ARHG5_HUMAN]
	640	P78352-2	Isoform 2 of Disks large homolog 4 OS=Homo sapiens GN=DLG4 - [DLG4_HUMAN]
	641	Q8N3P4	Vacuolar protein sorting-associated protein 8 homolog OS=Homo sapiens GN=VPS8 PE=1 SV=3 - [VPS8_HUMAN]
	642	Q86YA3	Uncharacterized protein C4orf21 OS=Homo sapiens GN=C4orf21 PE=2 SV=3 - [CD021_HUMAN]
	643	Q96L73	Histone-lysine N-methyltransferase, H3 lysine-36 and H4 lysine-20 specific OS=Homo sapiens GN=NSD1 PE=1 SV=1 - [NSD1_HUMAN]
	644	Q9NSA0-2	Isoform 2 of Solute carrier family 22 member 11 OS=Homo sapiens GN=SLC22A11 - [S22AB_HUMAN]
	645	Q8IY21	Probable ATP-dependent RNA helicase DDX60 OS=Homo sapiens GN=DDX60 PE=1 SV=3 - [DDX60_HUMAN]
	646	Q9Y4E1-2	Isoform 2 of WASH complex subunit FAM21C OS=Homo sapiens GN=FAM21C - [FA21C_HUMAN]
	647	Q12913	Receptor-type tyrosine-protein phosphatase eta OS=Homo sapiens GN=PTPRJ PE=1 SV=3 - [PTPRJ_HUMAN]
	648	Q0VF96	Cingulin-like protein 1 OS=Homo sapiens GN=CGNL1 PE=1 SV=2 - [CGNL1_HUMAN]
	649	Q8NDM7	WD repeat-containing protein 96 OS=Homo sapiens GN=WDR96 PE=2 SV=3 - [WDR96_HUMAN]
	650	Q6UVY6-2	Isoform 2 of DBH-like monooxygenase protein 1 OS=Homo sapiens GN=MOXD1 - [MOXD1_HUMAN]
	651	Q9H993	UPF0364 protein C6orf211 OS=Homo sapiens GN=C6orf211 PE=1 SV=1 - [CF211_HUMAN]
	652	Q9HAT8	E3 ubiquitin-protein ligase pellino homolog 2 OS=Homo sapiens GN=PELI2 PE=1 SV=1 - [PELI2_HUMAN]
	653	Q9Y2X9	Zinc finger protein 281 OS=Homo sapiens GN=ZNF281 PE=1 SV=1 - [ZN281_HUMAN]
	654	O14578-4	Isoform 4 of Citron Rho-interacting kinase OS=Homo sapiens GN=CIT - [CTRO_HUMAN]
	655	Q9ULH4	Leucine-rich repeat and fibronectin type-III domain-containing protein 2 OS=Homo sapiens GN=LRFN2 PE=1 SV=2 - [LRFN2_HUMAN]
	656	Q7L1Q6-4	Isoform 4 of Basic leucine zipper and W2 domain-containing protein 1 OS=Homo sapiens GN=BZW1 - [BZW1_HUMAN]
	657	Q9P289	Serine/threonine-protein kinase MST4 OS=Homo sapiens GN=MST4 PE=1 SV=2 - [MST4_HUMAN]
	658	P0CB43	Protein FAM203B OS=Homo sapiens GN=FAM203B PE=1 SV=1 - [F203B_HUMAN]
	659	A2VDJ0-5	Isoform 4 of Transmembrane protein 131-like OS=Homo sapiens GN=KIAA0922 - [T131L_HUMAN]
	660	Q5JUK3-2	Isoform 2 of Potassium channel subfamily T member 1 OS=Homo sapiens GN=KCNT1 - [KCNT1_HUMAN]
	661	Q32P28-3	Isoform 3 of Prolyl 3-hydroxylase 1 OS=Homo sapiens GN=LEPRE1 - [P3H1_HUMAN]
	662	Q15116	Programmed cell death protein 1 OS=Homo sapiens GN=PDCD1 PE=1 SV=3 - [PDCD1_HUMAN]
	663	O60391	Glutamate receptor ionotropic, NMDA 3B OS=Homo sapiens GN=GRIN3B PE=2 SV=2 - [NMD3B_HUMAN]
	664	Q9H2S6	Tenomodulin OS=Homo sapiens GN=TNMD PE=2 SV=1 - [TNMD_HUMAN]
	665	P06744	Glucose-6-phosphate isomerase OS=Homo sapiens GN=GPI PE=1 SV=4 - [G6PI_HUMAN]
	666	Q9NYQ7	Cadherin EGF LAG seven-pass G-type receptor 3 OS=Homo sapiens GN=CELSR3 PE=1 SV=2 - [CELR3_HUMAN]
	667	Q4G0X9	Coiled-coil domain-containing protein 40 OS=Homo sapiens GN=CCDC40 PE=2 SV=2 - [CCD40_HUMAN]
	668	Q8IYY4	Zinc finger protein DZIP1L OS=Homo sapiens GN=DZIP1L PE=2 SV=2 - [DZI1L_HUMAN]
	669	Q8IWT6	Leucine-rich repeat-containing protein 8A OS=Homo sapiens GN=LRRC8A PE=1 SV=1 - [LRC8A_HUMAN]
	670	Q9Y5G7	Protocadherin gamma-A6 OS=Homo sapiens GN=PCDHGA6 PE=2 SV=1 - [PCDG6_HUMAN]
	671	Q9HCK4	Roundabout homolog 2 OS=Homo sapiens GN=ROBO2 PE=1 SV=2 - [ROBO2_HUMAN]
	672	Q92973-2	Isoform 2 of Transportin-1 OS=Homo sapiens GN=TNPO1 - [TNPO1_HUMAN]
	673	Q8NBC4	Uncharacterized protein C20orf203 OS=Homo sapiens GN=C20orf203 PE=2 SV=2 - [CT203_HUMAN]
	674	Q96RE7	Nucleus accumbens-associated protein 1 OS=Homo sapiens GN=NACC1 PE=1 SV=1 - [NACC1_HUMAN]
	675	Q5JNZ5	Putative 40S ribosomal protein S26-like 1 OS=Homo sapiens GN=RPS26P11 PE=5 SV=1 - [RS26L_HUMAN]
	676	O75367-2	Isoform 1 of Core histone macro-H2A.1 OS=Homo sapiens GN=H2AFY - [H2AY_HUMAN]
	677	P40123	Adenylyl cyclase-associated protein 2 OS=Homo sapiens GN=CAP2 PE=1 SV=1 - [CAP2_HUMAN]
	678	Q9UQ16-2	Isoform 2 of Dynamin-3 OS=Homo sapiens GN=DNM3 - [DYN3_HUMAN]
	679	Q8TCU4-2	Isoform 2 of Alstrom syndrome protein 1 OS=Homo sapiens GN=ALMS1 - [ALMS1_HUMAN]
	680	Q9P2D0	Inhibitor of Bruton tyrosine kinase OS=Homo sapiens GN=IBTK PE=1 SV=3 - [IBTK_HUMAN]
	681	Q0JRZ9	FCH domain only protein 2 OS=Homo sapiens GN=FCHO2 PE=1 SV=2 - [FCHO2_HUMAN]
	682	Q8N5C8	TGF-beta-activated kinase 1 and MAP3K7-binding protein 3 OS=Homo sapiens GN=TAB3 PE=1 SV=2 - [TAB3_HUMAN]
	683	Q9NXL9	DNA helicase MCM9 OS=Homo sapiens GN=MCM9 PE=1 SV=4 - [MCM9_HUMAN]
	684	Q6ZP65	Bicaudal D-related protein 1 OS=Homo sapiens GN=CCDC64 PE=2 SV=2 - [BICR1_HUMAN]
	685	P35236-3	Isoform 3 of Tyrosine-protein phosphatase non-receptor type 7 OS=Homo sapiens GN=PTPN7 - [PTN7_HUMAN]
	686	A2RU30-2	Isoform 2 of Protein TESPA1 OS=Homo sapiens GN=TESPA1 - [TESP1_HUMAN]
	687	Q96LZ2	Melanoma-associated antigen B10 OS=Homo sapiens GN=MAGEB10 PE=2 SV=4 - [MAGBA_HUMAN]
	688	P15086	Carboxypeptidase B OS=Homo sapiens GN=CPB1 PE=1 SV=4 - [CBPB1_HUMAN]
	689	Q9Y5K6	CD2-associated protein OS=Homo sapiens GN=CD2AP PE=1 SV=1 - [CD2AP_HUMAN]
	690	P01374	Lymphotoxin-alpha OS=Homo sapiens GN=LTA PE=1 SV=2 - [TNFB_HUMAN]
	691	Q5SNV9-2	Isoform 2 of Uncharacterized protein C1orf167 OS=Homo sapiens GN=C1orf167 - [CA167_HUMAN]
	692	Q96C03	Mitochondrial dynamic protein MID49 OS=Homo sapiens GN=SMCR7 PE=1 SV=1 - [MID49_HUMAN]
	693	Q9H2D6	TRIO and F-actin-binding protein OS=Homo sapiens GN=TRIOBP PE=1 SV=3 - [TARA_HUMAN]
	694	Q9BQC3	Diphthamide biosynthesis protein 2 OS=Homo sapiens GN=DPH2 PE=1 SV=1 - [DPH2_HUMAN]
	695	Q6ZNG2	Homeobox protein DBX2 OS=Homo sapiens GN=DBX2 PE=2 SV=2 - [DBX2_HUMAN]
	696	Q6XYQ8	Synaptotagmin-10 OS=Homo sapiens GN=SYT10 PE=2 SV=1 - [SYT10_HUMAN]
	697	P01130-4	Isoform 4 of Low-density lipoprotein receptor OS=Homo sapiens GN=LDLR - [LDLR_HUMAN]
	698	O75095	Multiple epidermal growth factor-like domains protein 6 OS=Homo sapiens GN=MEGF6 PE=1 SV=4 - [MEGF6_HUMAN]
	699	Q6P4A8	Phospholipase B-like 1 OS=Homo sapiens GN=PLBD1 PE=1 SV=2 - [PLBL1_HUMAN]
	700	Q9NQW6	Actin-binding protein anillin OS=Homo sapiens GN=ANLN PE=1 SV=2 - [ANLN_HUMAN]
	701	Q8NCN5	Pyruvate dehydrogenase phosphatase regulatory subunit, mitochondrial OS=Homo sapiens GN=PDPR PE=1 SV=2 - [PDPR_HUMAN]
	702	Q9H329	Band 4.1-like protein 4B OS=Homo sapiens GN=EPB41L4B PE=2 SV=2 - [E41LB_HUMAN]
	703	Q9Y2U5	Mitogen-activated protein kinase kinase kinase 2 OS=Homo sapiens GN=MAP3K2 PE=1 SV=2 - [M3K2_HUMAN]
	704	Q9BV44	THUMP domain-containing protein 3 OS=Homo sapiens GN=THUMPD3 PE=1 SV=1 - [THUM3_HUMAN]
	705	Q92995	Ubiquitin carboxyl-terminal hydrolase 13 OS=Homo sapiens GN=USP13 PE=1 SV=2 - [UBP13_HUMAN]
	706	P55347-2	Isoform 2 of Homeobox protein PKNOX1 OS=Homo sapiens GN=PKNOX1 - [PKNX1_HUMAN]
	707	Q03167-2	Isoform 2 of Transforming growth factor beta receptor type 3 OS=Homo sapiens GN=TGFBR3 - [TGBR3_HUMAN]
	708	Q96MF2-2	Isoform 2 of SH3 and cysteine-rich domain-containing protein 3 OS=Homo sapiens GN=STAC3 - [STAC3_HUMAN]
	709	Q8NG84	Olfactory receptor 2AK2 OS=Homo sapiens GN=OR2AK2 PE=2 SV=2 - [O2AK2_HUMAN]
	710	Q08211	ATP-dependent RNA helicase A OS=Homo sapiens GN=DHX9 PE=1 SV=4 - [DHX9_HUMAN]
	711	Q12792	Twinfilin-1 OS=Homo sapiens GN=TWF1 PE=1 SV=3 - [TWF1_HUMAN]
	712	Q7Z5J8	Ankyrin and armadillo repeat-containing protein OS=Homo sapiens GN=ANKAR PE=2 SV=3 - [ANKAR_HUMAN]
	713	P49792	E3 SUMO-protein ligase RanBP2 OS=Homo sapiens GN=RANBP2 PE=1 SV=2 - [RBP2_HUMAN]
	714	Q7Z628	Neuroepithelial cell-transforming gene 1 protein OS=Homo sapiens GN=NET1 PE=1 SV=1 - [ARHG8_HUMAN]
	715	Q05195-2	Isoform 2 of Max dimerization protein 1 OS=Homo sapiens GN=MXD1 - [MAD1_HUMAN]
	716	Q93070	Ecto-ADP-ribosyltransferase 4 OS=Homo sapiens GN=ART4 PE=2 SV=2 - [NAR4_HUMAN]
	717	Q15393	Splicing factor 3B subunit 3 OS=Homo sapiens GN=SF3B3 PE=1 SV=4 - [SF3B3_HUMAN]
	718	Q9NR56-3	Isoform 3 of Muscleblind-like protein 1 OS=Homo sapiens GN=MBNL1 - [MBNL1_HUMAN]
	719	Q6UB35	Monofunctional C1-tetrahydrofolate synthase, mitochondrial OS=Homo sapiens GN=MTHFD1L PE=1 SV=1 - [C1TM_HUMAN]
	720	P50502	Hsc70-interacting protein OS=Homo sapiens GN=ST13 PE=1 SV=2 - [F10A1_HUMAN]
	721	Q5VT98	PRAME family member 20/21 OS=Homo sapiens GN=PRAMEF20 PE=2 SV=1 - [PRA20_HUMAN]
	722	Q14246-3	Isoform 3 of EGF-like module-containing mucin-like hormone receptor-like 1 OS=Homo sapiens GN=EMR1 - [EMR1_HUMAN]
	723	P20936	Ras GTPase-activating protein 1 OS=Homo sapiens GN=RASA1 PE=1 SV=1 - [RASA1_HUMAN]
	724	Q07890	Son of sevenless homolog 2 OS=Homo sapiens GN=SOS2 PE=1 SV=2 - [SOS2_HUMAN]
	725	A0AVI4-2	Isoform 2 of Transmembrane protein 129 OS=Homo sapiens GN=TMEM129 - [TM129_HUMAN]
	726	Q86WG5	Myotubularin-related protein 13 OS=Homo sapiens GN=SBF2 PE=1 SV=1 - [MTMRD_HUMAN]
	727	Q8IZY2	ATP-binding cassette sub-family A member 7 OS=Homo sapiens GN=ABCA7 PE=1 SV=3 - [ABCA7_HUMAN]
	728	Q7LBC6	Lysine-specific demethylase 3B OS=Homo sapiens GN=KDM3B PE=1 SV=2 - [KDM3B_HUMAN]
	729	O14815	Calpain-9 OS=Homo sapiens GN=CAPN9 PE=1 SV=1 - [CAN9_HUMAN]
	730	Q9NSI2	Protein FAM207A OS=Homo sapiens GN=FAM207A PE=1 SV=2 - [F207A_HUMAN]
	731	Q9C0F0	Putative Polycomb group protein ASXL3 OS=Homo sapiens GN=ASXL3 PE=2 SV=3 - [ASXL3_HUMAN]
	732	Q5M775	Cytospin-B OS=Homo sapiens GN=SPECC1 PE=1 SV=1 - [CYTSB_HUMAN]
	733	A6NFC9	Putative olfactory receptor 2W5 OS=Homo sapiens GN=OR2W5 PE=5 SV=1 - [OR2W5_HUMAN]
	734	P09651-2	Isoform A1-A of Heterogeneous nuclear ribonucleoprotein A1 OS=Homo sapiens GN=HNRNPA1 - [ROA1_HUMAN]
	735	P15170	Eukaryotic peptide chain release factor GTP-binding subunit ERF3A OS=Homo sapiens GN=GSPT1 PE=1 SV=1 - [ERF3A_HUMAN]
	736	Q99685-2	Isoform 2 of Monoglyceride lipase OS=Homo sapiens GN=MGLL - [MGLL_HUMAN]
	737	Q15477	Helicase SKI2W OS=Homo sapiens GN=SKIV2L PE=1 SV=3 - [SKIV2_HUMAN]
	738	Q8TD20	Solute carrier family 2, facilitated glucose transporter member 12 OS=Homo sapiens GN=SLC2A12 PE=2 SV=1 - [GTR12_HUMAN]
	739	Q9TNN7	HLA class I histocompatibility antigen, Cw-5 alpha chain OS=Homo sapiens GN=HLA-C PE=2 SV=1 - [1C05_HUMAN]
	740	Q6ZNH5	Zinc finger protein 497 OS=Homo sapiens GN=ZNF497 PE=2 SV=2 - [ZN497_HUMAN]
	741	Q6ZMZ0-4	Isoform 4 of E3 ubiquitin-protein ligase RNF19B OS=Homo sapiens GN=RNF19B - [RN19B_HUMAN]
	742	O76013	Keratin, type I cuticular Ha6 OS=Homo sapiens GN=KRT36 PE=1 SV=1 - [KRT36_HUMAN]
	743	O94919	Endonuclease domain-containing 1 protein OS=Homo sapiens GN=ENDOD1 PE=1 SV=2 - [ENDD1_HUMAN]
	744	Q7Z3I7	Zinc finger protein 572 OS=Homo sapiens GN=ZNF572 PE=2 SV=1 - [ZN572_HUMAN]
	745	Q5TIA1	Meiosis inhibitor protein 1 OS=Homo sapiens GN=MEI1 PE=2 SV=2 - [MEI1_HUMAN]
	746	Q9C0E4-2	Isoform 2 of Glutamate receptor-interacting protein 2 OS=Homo sapiens GN=GRIP2 - [GRIP2_HUMAN]
	747	O15235	28S ribosomal protein S12, mitochondrial OS=Homo sapiens GN=MRPS12 PE=1 SV=1 - [RT12_HUMAN]
	748	Q9GZU2	Paternally-expressed gene 3 protein OS=Homo sapiens GN=PEG3 PE=1 SV=1 - [PEG3_HUMAN]
	749	Q9BVI0	PHD finger protein 20 OS=Homo sapiens GN=PHF20 PE=1 SV=2 - [PHF20_HUMAN]
	750	P55011-3	Isoform 2 of Solute carrier family 12 member 2 OS=Homo sapiens GN=SLC12A2 - [S12A2_HUMAN]
	751	P43004-2	Isoform 2 of Excitatory amino acid transporter 2 OS=Homo sapiens GN=SLC1A2 - [EAA2_HUMAN]
	752	P16499	Rod cGMP-specific 3',5'-cyclic phosphodiesterase subunit alpha OS=Homo sapiens GN=PDE6A PE=1 SV=4 - [PDE6A_HUMAN]
	753	Q9Y6N6	Laminin subunit gamma-3 OS=Homo sapiens GN=LAMC3 PE=1 SV=3 - [LAMC3_HUMAN]
	754	Q9BYC5	Alpha-(1,6)-fucosyltransferase OS=Homo sapiens GN=FUT8 PE=1 SV=2 - [FUT8_HUMAN]
	755	Q76N89	E3 ubiquitin-protein ligase HECW1 OS=Homo sapiens GN=HECW1 PE=1 SV=3 - [HECW1_HUMAN]
	756	O00144	Frizzled-9 OS=Homo sapiens GN=FZD9 PE=2 SV=1 - [FZD9_HUMAN]
	757	Q9BW71	HIRA-interacting protein 3 OS=Homo sapiens GN=HIRIP3 PE=1 SV=3 - [HIRP3_HUMAN]
	758	Q8TE82	SH3 domain and tetratricopeptide repeat-containing protein 1 OS=Homo sapiens GN=SH3TC1 PE=1 SV=3 - [S3TC1_HUMAN]
	759	Q5T1N1	Protein AKNAD1 OS=Homo sapiens GN=AKNAD1 PE=2 SV=3 - [AKND1_HUMAN]
	760	Q8WXJ9	Ankyrin repeat and SOCS box protein 17 OS=Homo sapiens GN=ASB17 PE=2 SV=2 - [ASB17_HUMAN]
	761	Q96F44	E3 ubiquitin-protein ligase TRIM11 OS=Homo sapiens GN=TRIM11 PE=1 SV=2 - [TRI11_HUMAN]
	762	Q6WRI0	Immunoglobulin superfamily member 10 OS=Homo sapiens GN=IGSF10 PE=2 SV=1 - [IGS10_HUMAN]
	763	Q9HBJ7	Ubiquitin carboxyl-terminal hydrolase 29 OS=Homo sapiens GN=USP29 PE=2 SV=1 - [UBP29_HUMAN]
	764	P08151-2	Isoform 2 of Zinc finger protein GLI1 OS=Homo sapiens GN=GLI1 - [GLI1_HUMAN]
	765	P60981-2	Isoform 2 of Destrin OS=Homo sapiens GN=DSTN - [DEST_HUMAN]
	766	Q8IVU1	Immunoglobulin superfamily DCC subclass member 3 OS=Homo sapiens GN=IGDCC3 PE=2 SV=2 - [IGDC3_HUMAN]
	767	O14920	Inhibitor of nuclear factor kappa-B kinase subunit beta OS=Homo sapiens GN=IKBKB PE=1 SV=1 - [IKKB_HUMAN]
	768	P98160	Basement membrane-specific heparan sulfate proteoglycan core protein OS=Homo sapiens GN=HSPG2 PE=1 SV=4 - [PGBM_HUMAN]
	769	Q92614-4	Isoform 4 of Unconventional myosin-XVIIIa OS=Homo sapiens GN=MYO18A - [MY18A_HUMAN]
	770	Q92576	PHD finger protein 3 OS=Homo sapiens GN=PHF3 PE=1 SV=3 - [PHF3_HUMAN]
	771	Q15468-2	Isoform 2 of SCL-interrupting locus protein OS=Homo sapiens GN=STIL - [STIL_HUMAN]
	772	Q6N022	Teneurin-4 OS=Homo sapiens GN=TENM4 PE=1 SV=2 - [TEN4_HUMAN]
	773	Q86WR0	Coiled-coil domain-containing protein 25 OS=Homo sapiens GN=CCDC25 PE=1 SV=2 - [CCD25_HUMAN]
	774	Q8NC51-3	Isoform 3 of Plasminogen activator inhibitor 1 RNA-binding protein OS=Homo sapiens GN=SERBP1 - [PAIRB_HUMAN]
	775	Q9H7T3	Uncharacterized protein C10orf95 OS=Homo sapiens GN=C10orf95 PE=1 SV=1 - [CJ095_HUMAN]
	776	A2RRP1	Neuroblastoma-amplified sequence OS=Homo sapiens GN=NBAS PE=1 SV=2 - [NBAS_HUMAN]
	777	Q8TF39	Zinc finger protein 483 OS=Homo sapiens GN=ZNF483 PE=1 SV=3 - [ZN483_HUMAN]
	778	Q9NR50-2	Isoform 2 of Translation initiation factor eIF-2B subunit gamma OS=Homo sapiens GN=EIF2B3 - [EI2BG_HUMAN]
	779	Q6P0N0	Mis18-binding protein 1 OS=Homo sapiens GN=MIS18BP1 PE=1 SV=1 - [M18BP_HUMAN]
	780	Q6ZS81	WD repeat- and FYVE domain-containing protein 4 OS=Homo sapiens GN=WDFY4 PE=1 SV=3 - [WDFY4_HUMAN]
	781	Q96MG2	Junctional sarcoplasmic reticulum protein 1 OS=Homo sapiens GN=JSRP1 PE=1 SV=1 - [JSPR1_HUMAN]
	782	Q96NU0	Contactin-associated protein-like 3B OS=Homo sapiens GN=CNTNAP3B PE=2 SV=2 - [CNT3B_HUMAN]
	783	O15287	Fanconi anemia group G protein OS=Homo sapiens GN=FANCG PE=1 SV=1 - [FANCG_HUMAN]
	784	Q9P104	Docking protein 5 OS=Homo sapiens GN=DOK5 PE=1 SV=2 - [DOK5_HUMAN]
	785	Q08345	Epithelial discoidin domain-containing receptor 1 OS=Homo sapiens GN=DDR1 PE=1 SV=1 - [DDR1_HUMAN]
	786	P35527	Keratin, type I cytoskeletal 9 OS=Homo sapiens GN=KRT9 PE=1 SV=3 - [K1C9_HUMAN]
	787	Q9BWV1	Brother of CDO OS=Homo sapiens GN=BOC PE=1 SV=1 - [BOC_HUMAN]
	788	O14964	Hepatocyte growth factor-regulated tyrosine kinase substrate OS=Homo sapiens GN=HGS PE=1 SV=1 - [HGS_HUMAN]
	789	O60721-2	Isoform 2 of Sodium/potassium/calcium exchanger 1 OS=Homo sapiens GN=SLC24A1 - [NCKX1_HUMAN]
	790	Q12767	Uncharacterized protein KIAA0195 OS=Homo sapiens GN=KIAA0195 PE=1 SV=1 - [K0195_HUMAN]
	791	Q8N2K0-3	Isoform 3 of Monoacylglycerol lipase ABHD12 OS=Homo sapiens GN=ABHD12 - [ABD12_HUMAN]
	792	Q6DT37	Serine/threonine-protein kinase MRCK gamma OS=Homo sapiens GN=CDC42BPG PE=1 SV=2 - [MRCKG_HUMAN]
	793	Q9HCP6	Protein-cysteine N-palmitoyltransferase HHAT-like protein OS=Homo sapiens GN=HHATL PE=2 SV=1 - [HHATL_HUMAN]
	794	Q13698	Voltage-dependent L-type calcium channel subunit alpha-1S OS=Homo sapiens GN=CACNA1S PE=1 SV=4 - [CAC1S_HUMAN]
	795	O75054	Immunoglobulin superfamily member 3 OS=Homo sapiens GN=IGSF3 PE=2 SV=3 - [IGSF3_HUMAN]
	796	Q02156	Protein kinase C epsilon type OS=Homo sapiens GN=PRKCE PE=1 SV=1 - [KPCE_HUMAN]
	797	Q86T65-4	Isoform 2 of Disheveled-associated activator of morphogenesis 2 OS=Homo sapiens GN=DAAM2 - [DAAM2_HUMAN]
	798	Q8TBX8-3	Isoform 3 of Phosphatidylinositol 5-phosphate 4-kinase type-2 gamma OS=Homo sapiens GN=PIP4K2C - [PI42C_HUMAN]
	799	Q8NF86	Serine protease 33 OS=Homo sapiens GN=PRSS33 PE=1 SV=3 - [PRS33_HUMAN]
	800	Q5VT52-3	Isoform 3 of Regulation of nuclear pre-mRNA domain-containing protein 2 OS=Homo sapiens GN=RPRD2 - [RPRD2_HUMAN]
	801	A8MXV6	CMT1A duplicated region transcript 15 protein-like protein OS=Homo sapiens GN=CDRT15L2 PE=2 SV=1 - [CD15L_HUMAN]
	802	Q3SXZ3	Zinc finger protein 718 OS=Homo sapiens GN=ZNF718 PE=2 SV=1 - [ZN718_HUMAN]
	803	Q6ZWH5	Serine/threonine-protein kinase Nek10 OS=Homo sapiens GN=NEK10 PE=2 SV=3 - [NEK10_HUMAN]
	804	Q96ST3	Paired amphipathic helix protein Sin3a OS=Homo sapiens GN=SIN3A PE=1 SV=2 - [SIN3A_HUMAN]
	805	Q8N7K9	Uncharacterized protein FLJ40925 OS=Homo sapiens PE=2 SV=1 - [YS059_HUMAN]
	806	Q86UK7-2	Isoform 2 of Zinc finger protein 598 OS=Homo sapiens GN=ZNF598 - [ZN598_HUMAN]
	807	Q5VWN6	Protein FAM208B OS=Homo sapiens GN=FAM208B PE=1 SV=1 - [F208B_HUMAN]
	808	Q9UBS5-4	Isoform 1D of Gamma-aminobutyric acid type B receptor subunit 1 OS=Homo sapiens GN=GABBR1 - [GABR1_HUMAN]
	809	P31260	Homeobox protein Hox-A10 OS=Homo sapiens GN=HOXA10 PE=1 SV=3 - [HXA10_HUMAN]
	810	A8MVW0	Protein FAM171A2 OS=Homo sapiens GN=FAM171A2 PE=1 SV=1 - [F1712_HUMAN]
	811	Q14517	Protocadherin Fat 1 OS=Homo sapiens GN=FAT1 PE=1 SV=2 - [FAT1_HUMAN]
	812	A2RUT3	Transmembrane protein 89 OS=Homo sapiens GN=TMEM89 PE=2 SV=1 - [TMM89_HUMAN]
	813	Q8N6S4	Ankyrin repeat domain-containing protein 13C OS=Homo sapiens GN=ANKRD13C PE=2 SV=2 - [AN13C_HUMAN]
	814	Q8WWR8-2	Isoform 2 of Sialidase-4 OS=Homo sapiens GN=NEU4 - [NEUR4_HUMAN]
	815	Q5T6X5	G-protein coupled receptor family C group 6 member A OS=Homo sapiens GN=GPRC6A PE=1 SV=1 - [GPC6A_HUMAN]
	816	Q9P217	Zinc finger SWIM domain-containing protein 5 OS=Homo sapiens GN=ZSWIM5 PE=2 SV=2 - [ZSWM5_HUMAN]
	817	Q14894	Ketimine reductase mu-crystallin OS=Homo sapiens GN=CRYM PE=1 SV=1 - [CRYM_HUMAN]
	818	Q02763	Angiopoietin-1 receptor OS=Homo sapiens GN=TEK PE=1 SV=2 - [TIE2_HUMAN]
	819	Q6ECI4	Zinc finger protein 470 OS=Homo sapiens GN=ZNF470 PE=2 SV=3 - [ZN470_HUMAN]
	820	Q8TAM1	Bardet-Biedl syndrome 10 protein OS=Homo sapiens GN=BBS10 PE=1 SV=2 - [BBS10_HUMAN]
	821	O00462	Beta-mannosidase OS=Homo sapiens GN=MANBA PE=1 SV=3 - [MANBA_HUMAN]
	822	Q96N22	Zinc finger protein 681 OS=Homo sapiens GN=ZNF681 PE=2 SV=2 - [ZN681_HUMAN]
	823	Q01668-2	Isoform Beta-cell-type of Voltage-dependent L-type calcium channel subunit alpha-1D OS=Homo sapiens GN=CACNA1D - [CAC1D_HUMAN]
	824	P14209-3	Isoform 3 of CD99 antigen OS=Homo sapiens GN=CD99 - [CD99_HUMAN]
	825	Q7LBR1	Charged multivesicular body protein 1b OS=Homo sapiens GN=CHMP1B PE=1 SV=1 - [CHM1B_HUMAN]
	826	P22626	Heterogeneous nuclear ribonucleoproteins A2/B1 OS=Homo sapiens GN=HNRNPA2B1 PE=1 SV=2 - [ROA2_HUMAN]
	827	Q6V0I7-3	Isoform 3 of Protocadherin Fat 4 OS=Homo sapiens GN=FAT4 - [FAT4_HUMAN]
	828	Q9NVE4	Coiled-coil domain-containing protein 87 OS=Homo sapiens GN=CCDC87 PE=2 SV=2 - [CCD87_HUMAN]
	829	Q8N9W4	Golgin subfamily A member 6-like protein 2 OS=Homo sapiens GN=GOLGA6L2 PE=2 SV=2 - [GG6L2_HUMAN]
	830	A1A4V9	Coiled-coil domain-containing protein C16orf93 OS=Homo sapiens GN=C16orf93 PE=2 SV=1 - [CP093_HUMAN]
	831	Q9BXS4	Transmembrane protein 59 OS=Homo sapiens GN=TMEM59 PE=1 SV=1 - [TMM59_HUMAN]
	832	P61353	60S ribosomal protein L27 OS=Homo sapiens GN=RPL27 PE=1 SV=2 - [RL27_HUMAN]
	833	Q96QP1	Alpha-protein kinase 1 OS=Homo sapiens GN=ALPK1 PE=2 SV=3 - [ALPK1_HUMAN]
	834	Q5TDP6	Lengsin OS=Homo sapiens GN=LGSN PE=1 SV=1 - [LGSN_HUMAN]
	835	P49757-3	Isoform 3 of Protein numb homolog OS=Homo sapiens GN=NUMB - [NUMB_HUMAN]
	836	Q9HCE6	Rho guanine nucleotide exchange factor 10-like protein OS=Homo sapiens GN=ARHGEF10L PE=1 SV=3 - [ARGAL_HUMAN]
	837	Q86SP6	Probable G-protein coupled receptor 149 OS=Homo sapiens GN=GPR149 PE=2 SV=2 - [GP149_HUMAN]
	838	Q9C0G0	Zinc finger protein 407 OS=Homo sapiens GN=ZNF407 PE=1 SV=2 - [ZN407_HUMAN]
	839	Q969X6-3	Isoform 3 of Cirhin OS=Homo sapiens GN=CIRH1A - [CIR1A_HUMAN]
	840	Q96E52	Metalloendopeptidase OMA1, mitochondrial OS=Homo sapiens GN=OMA1 PE=1 SV=1 - [OMA1_HUMAN]
	841	P62633-5	Isoform 5 of Cellular nucleic acid-binding protein OS=Homo sapiens GN=CNBP - [CNBP_HUMAN]
	842	A6NCI4	von Willebrand factor A domain-containing protein 3A OS=Homo sapiens GN=VWA3A PE=2 SV=3 - [VWA3A_HUMAN]
	843	A1L170-2	Isoform 2 of Uncharacterized protein C1orf226 OS=Homo sapiens GN=C1orf226 - [CA226_HUMAN]
	844	Q9BY43	Charged multivesicular body protein 4a OS=Homo sapiens GN=CHMP4A PE=1 SV=3 - [CHM4A_HUMAN]
	845	Q14978	Nucleolar and coiled-body phosphoprotein 1 OS=Homo sapiens GN=NOLC1 PE=1 SV=2 - [NOLC1_HUMAN]
	846	Q8TE60	A disintegrin and metalloproteinase with thrombospondin motifs 18 OS=Homo sapiens GN=ADAMTS18 PE=1 SV=3 - [ATS18_HUMAN]
	847	Q9BY12-2	Isoform 2 of S phase cyclin A-associated protein in the endoplasmic reticulum OS=Homo sapiens GN=SCAPER - [SCAPE_HUMAN]
	848	Q17R89	Rho GTPase-activating protein 44 OS=Homo sapiens GN=ARHGAP44 PE=1 SV=1 - [RHG44_HUMAN]
	849	O14771	Zinc finger protein 213 OS=Homo sapiens GN=ZNF213 PE=2 SV=2 - [ZN213_HUMAN]
	850	O43826	Glucose-6-phosphate translocase OS=Homo sapiens GN=SLC37A4 PE=1 SV=1 - [G6PT1_HUMAN]
	851	P24539	ATP synthase F(0) complex subunit B1, mitochondrial OS=Homo sapiens GN=ATP5F1 PE=1 SV=2 - [AT5F1_HUMAN]
	852	O94979-9	Isoform 9 of Protein transport protein Sec31A OS=Homo sapiens GN=SEC31A - [SC31A_HUMAN]
	853	Q96DR7	Rho guanine nucleotide exchange factor 26 OS=Homo sapiens GN=ARHGEF26 PE=1 SV=4 - [ARHGQ_HUMAN]
	854	P52948-5	Isoform 5 of Nuclear pore complex protein Nup98-Nup96 OS=Homo sapiens GN=NUP98 - [NUP98_HUMAN]
	855	P53804	E3 ubiquitin-protein ligase TTC3 OS=Homo sapiens GN=TTC3 PE=1 SV=2 - [TTC3_HUMAN]
	856	O94966-6	Isoform 6 of Ubiquitin carboxyl-terminal hydrolase 19 OS=Homo sapiens GN=USP19 - [UBP19_HUMAN]
	857	Q9NRD9	Dual oxidase 1 OS=Homo sapiens GN=DUOX1 PE=1 SV=1 - [DUOX1_HUMAN]
	858	O75626-2	Isoform 2 of PR domain zinc finger protein 1 OS=Homo sapiens GN=PRDM1 - [PRDM1_HUMAN]
	859	P24928	DNA-directed RNA polymerase II subunit RPB1 OS=Homo sapiens GN=POLR2A PE=1 SV=2 - [RPB1_HUMAN]
	860	Q5SWA1	Protein phosphatase 1 regulatory subunit 15B OS=Homo sapiens GN=PPP1R15B PE=1 SV=1 - [PR15B_HUMAN]
	861	Q9Y6R6	Zinc finger protein 780B OS=Homo sapiens GN=ZNF780B PE=2 SV=1 - [Z780B_HUMAN]
	862	Q9UKD1	Glucocorticoid modulatory element-binding protein 2 OS=Homo sapiens GN=GMEB2 PE=1 SV=1 - [GMEB2_HUMAN]
	863	P20333-2	Isoform 2 of Tumor necrosis factor receptor superfamily member 1B OS=Homo sapiens GN=TNFRSF1B - [TNR1B_HUMAN]
	864	Q9ULG6-5	Isoform 5 of Cell cycle progression protein 1 OS=Homo sapiens GN=CCPG1 - [CCPG1_HUMAN]
	865	O15431	High affinity copper uptake protein 1 OS=Homo sapiens GN=SLC31A1 PE=1 SV=1 - [COPT1_HUMAN]
	866	Q9Y6R1-4	Isoform 4 of Electrogenic sodium bicarbonate cotransporter 1 OS=Homo sapiens GN=SLC4A4 - [S4A4_HUMAN]
	867	P13473	Lysosome-associated membrane glycoprotein 2 OS=Homo sapiens GN=LAMP2 PE=1 SV=2 - [LAMP2_HUMAN]
	868	Q5SZK8	FRAS1-related extracellular matrix protein 2 OS=Homo sapiens GN=FREM2 PE=1 SV=2 - [FREM2_HUMAN]
	869	Q8NGD1	Olfactory receptor 4N2 OS=Homo sapiens GN=OR4N2 PE=2 SV=1 - [OR4N2_HUMAN]
	870	Q8NHU2	Uncharacterized protein C20orf26 OS=Homo sapiens GN=C20orf26 PE=2 SV=3 - [CT026_HUMAN]
	871	Q9H9G7	Protein argonaute-3 OS=Homo sapiens GN=AGO3 PE=1 SV=2 - [AGO3_HUMAN]
	872	Q13797	Integrin alpha-9 OS=Homo sapiens GN=ITGA9 PE=1 SV=2 - [ITA9_HUMAN]
	873	Q9Y4H2	Insulin receptor substrate 2 OS=Homo sapiens GN=IRS2 PE=1 SV=2 - [IRS2_HUMAN]
	874	O43309	Zinc finger and SCAN domain-containing protein 12 OS=Homo sapiens GN=ZSCAN12 PE=2 SV=1 - [ZSC12_HUMAN]
	875	Q6ZU65	Ubinuclein-2 OS=Homo sapiens GN=UBN2 PE=1 SV=2 - [UBN2_HUMAN]
	876	Q13433	Zinc transporter ZIP6 OS=Homo sapiens GN=SLC39A6 PE=1 SV=3 - [S39A6_HUMAN]
	877	Q5U651	Ras-interacting protein 1 OS=Homo sapiens GN=RASIP1 PE=1 SV=1 - [RAIN_HUMAN]
	878	Q9GZV4	Eukaryotic translation initiation factor 5A-2 OS=Homo sapiens GN=EIF5A2 PE=1 SV=3 - [IF5A2_HUMAN]
	879	O95453-2	Isoform 2 of Poly(A)-specific ribonuclease PARN OS=Homo sapiens GN=PARN - [PARN_HUMAN]
	880	Q5T749	Keratinocyte proline-rich protein OS=Homo sapiens GN=KPRP PE=1 SV=1 - [KPRP_HUMAN]
	881	Q9NRR5	Ubiquilin-4 OS=Homo sapiens GN=UBQLN4 PE=1 SV=2 - [UBQL4_HUMAN]
	882	Q15003	Condensin complex subunit 2 OS=Homo sapiens GN=NCAPH PE=1 SV=3 - [CND2_HUMAN]
	883	P15529-9	Isoform N of Membrane cofactor protein OS=Homo sapiens GN=CD46 - [MCP_HUMAN]
	884	Q9UJK0	Ribosome biogenesis protein TSR3 homolog OS=Homo sapiens GN=TSR3 PE=1 SV=1 - [TSR3_HUMAN]
	885	Q9BXU7	Ubiquitin carboxyl-terminal hydrolase 26 OS=Homo sapiens GN=USP26 PE=1 SV=1 - [UBP26_HUMAN]
	886	Q3SY52	Zinc finger protein interacting with ribonucleoprotein K OS=Homo sapiens GN=ZIK1 PE=2 SV=1 - [ZIK1_HUMAN]
	887	Q8NH93	Olfactory receptor 1L3 OS=Homo sapiens GN=OR1L3 PE=2 SV=1 - [OR1L3_HUMAN]
	888	Q9UIG0-2	Isoform 2 of Tyrosine-protein kinase BAZ1B OS=Homo sapiens GN=BAZ1B - [BAZ1B_HUMAN]
	889	A4FU69	EF-hand calcium-binding domain-containing protein 5 OS=Homo sapiens GN=EFCAB5 PE=1 SV=3 - [EFCB5_HUMAN]
	890	P19256-3	Isoform 3 of Lymphocyte function-associated antigen 3 OS=Homo sapiens GN=CD58 - [LFA3_HUMAN]
	891	B0I1T2	Unconventional myosin-Ig OS=Homo sapiens GN=MYO1G PE=1 SV=2 - [MYO1G_HUMAN]
	892	P61296	Heart- and neural crest derivatives-expressed protein 2 OS=Homo sapiens GN=HAND2 PE=1 SV=1 - [HAND2_HUMAN]
	893	Q14207	Protein NPAT OS=Homo sapiens GN=NPAT PE=1 SV=3 - [NPAT_HUMAN]
	894	Q9Y5F1	Protocadherin beta-12 OS=Homo sapiens GN=PCDHB12 PE=2 SV=1 - [PCDBC_HUMAN]
	895	Q8IYW5	E3 ubiquitin-protein ligase RNF168 OS=Homo sapiens GN=RNF168 PE=1 SV=1 - [RN168_HUMAN]
	896	Q9NZM3	Intersectin-2 OS=Homo sapiens GN=ITSN2 PE=1 SV=3 - [ITSN2_HUMAN]
	897	Q9NY35-2	Isoform 2 of Claudin domain-containing protein 1 OS=Homo sapiens GN=CLDND1 - [CLDN1_HUMAN]
	898	O14880	Microsomal glutathione S-transferase 3 OS=Homo sapiens GN=MGST3 PE=1 SV=1 - [MGST3_HUMAN]
	899	Q52M93	Zinc finger protein 585B OS=Homo sapiens GN=ZNF585B PE=2 SV=1 - [Z585B_HUMAN]
	900	O95236	Apolipoprotein L3 OS=Homo sapiens GN=APOL3 PE=2 SV=3 - [APOL3_HUMAN]
	901	Q8TDB8	Solute carrier family 2, facilitated glucose transporter member 14 OS=Homo sapiens GN=SLC2A14 PE=2 SV=1 - [GTR14_HUMAN]
	902	P43366	Melanoma-associated antigen B1 OS=Homo sapiens GN=MAGEB1 PE=1 SV=2 - [MAGB1_HUMAN]
	903	Q8N8M0	Putative N-acetyltransferase 16 OS=Homo sapiens GN=NAT16 PE=2 SV=2 - [NAT16_HUMAN]
	904	Q13158	Protein FADD OS=Homo sapiens GN=FADD PE=1 SV=1 - [FADD_HUMAN]
	905	O15121	Sphingolipid delta(4)-desaturase DES1 OS=Homo sapiens GN=DEGS1 PE=1 SV=1 - [DEGS1_HUMAN]
	906	Q68CQ7	Glycosyltransferase 8 domain-containing protein 1 OS=Homo sapiens GN=GLT8D1 PE=1 SV=2 - [GL8D1_HUMAN]
	907	Q8IWX8	Calcium homeostasis endoplasmic reticulum protein OS=Homo sapiens GN=CHERP PE=1 SV=3 - [CHERP_HUMAN]
	908	Q9UPM8	AP-4 complex subunit epsilon-1 OS=Homo sapiens GN=AP4E1 PE=1 SV=2 - [AP4E1_HUMAN]
	909	P53990	IST1 homolog OS=Homo sapiens GN=IST1 PE=1 SV=1 - [IST1_HUMAN]
	910	Q13129	Zinc finger protein Rlf OS=Homo sapiens GN=RLF PE=1 SV=2 - [RLF_HUMAN]
	911	P55286	Cadherin-8 OS=Homo sapiens GN=CDH8 PE=1 SV=2 - [CADH8_HUMAN]
	912	Q04637-5	Isoform D of Eukaryotic translation initiation factor 4 gamma 1 OS=Homo sapiens GN=EIF4G1 - [IF4G1_HUMAN]
	913	Q6ZTN6-3	Isoform 3 of Ankyrin repeat domain-containing protein 13D OS=Homo sapiens GN=ANKRD13D - [AN13D_HUMAN]
	914	Q8NGZ9	Olfactory receptor 2T10 OS=Homo sapiens GN=OR2T10 PE=2 SV=1 - [O2T10_HUMAN]
	915	O14686-3	Isoform 3 of Histone-lysine N-methyltransferase 2D OS=Homo sapiens GN=KMT2D - [KMT2D_HUMAN]
	916	O95758-4	Isoform 4 of Polypyrimidine tract-binding protein 3 OS=Homo sapiens GN=PTBP3 - [PTBP3_HUMAN]
	917	P78563-2	Isoform 2 of Double-stranded RNA-specific editase 1 OS=Homo sapiens GN=ADARB1 - [RED1_HUMAN]
	918	Q2NL68	Uncharacterized protein C19orf55 OS=Homo sapiens GN=C19orf55 PE=2 SV=1 - [CS055_HUMAN]
	919	P61221	ATP-binding cassette sub-family E member 1 OS=Homo sapiens GN=ABCE1 PE=1 SV=1 - [ABCE1_HUMAN]
	920	Q8NHA4	Olfactory receptor 2AE1 OS=Homo sapiens GN=OR2AE1 PE=2 SV=1 - [O2AE1_HUMAN]
	921	Q6PJE2	POM121 and ZP3 fusion protein OS=Homo sapiens GN=POMZP3 PE=2 SV=4 - [POZP3_HUMAN]
	922	Q16512	Serine/threonine-protein kinase N1 OS=Homo sapiens GN=PKN1 PE=1 SV=2 - [PKN1_HUMAN]
	923	O94763	Unconventional prefoldin RPB5 interactor 1 OS=Homo sapiens GN=URI1 PE=1 SV=3 - [RMP_HUMAN]
	924	Q6AI14	Sodium/hydrogen exchanger 4 OS=Homo sapiens GN=SLC9A4 PE=1 SV=2 - [SL9A4_HUMAN]
	925	Q401N2	Zinc-activated ligand-gated ion channel OS=Homo sapiens GN=ZACN PE=1 SV=2 - [ZACN_HUMAN]
	926	Q16254	Transcription factor E2F4 OS=Homo sapiens GN=E2F4 PE=1 SV=2 - [E2F4_HUMAN]
	927	O43186	Cone-rod homeobox protein OS=Homo sapiens GN=CRX PE=1 SV=1 - [CRX_HUMAN]
	928	Q9Y219	Protein jagged-2 OS=Homo sapiens GN=JAG2 PE=1 SV=3 - [JAG2_HUMAN]
	929	Q92737	Ras-like protein family member 10A OS=Homo sapiens GN=RASL10A PE=1 SV=1 - [RSLAA_HUMAN]
	930	Q8N187	Calcium-responsive transcription factor OS=Homo sapiens GN=CARF PE=1 SV=2 - [CARTF_HUMAN]
	931	P10646-2	Isoform Beta of Tissue factor pathway inhibitor OS=Homo sapiens GN=TFPI - [TFPI1_HUMAN]
	932	Q96RV3	Pecanex-like protein 1 OS=Homo sapiens GN=PCNX PE=1 SV=2 - [PCX1_HUMAN]
	933	Q5SY16	Polynucleotide 5'-hydroxyl-kinase NOL9 OS=Homo sapiens GN=NOL9 PE=1 SV=1 - [NOL9_HUMAN]
	934	Q9UQD0-3	Isoform 3 of Sodium channel protein type 8 subunit alpha OS=Homo sapiens GN=SCN8A - [SCN8A_HUMAN]
	935	Q8IZT6	Abnormal spindle-like microcephaly-associated protein OS=Homo sapiens GN=ASPM PE=1 SV=2 - [ASPM_HUMAN]
	936	P43681	Neuronal acetylcholine receptor subunit alpha-4 OS=Homo sapiens GN=CHRNA4 PE=1 SV=2 - [ACHA4_HUMAN]
	937	Q16236	Nuclear factor erythroid 2-related factor 2 OS=Homo sapiens GN=NFE2L2 PE=1 SV=3 - [NF2L2_HUMAN]
	938	Q5JU00	T-complex-associated testis-expressed protein 1 OS=Homo sapiens GN=TCTE1 PE=2 SV=1 - [TCTE1_HUMAN]
	939	P54707	Potassium-transporting ATPase alpha chain 2 OS=Homo sapiens GN=ATP12A PE=1 SV=3 - [AT12A_HUMAN]
	940	Q9BYV6	Tripartite motif-containing protein 55 OS=Homo sapiens GN=TRIM55 PE=1 SV=2 - [TRI55_HUMAN]
	941	Q9H8P0	Polyprenol reductase OS=Homo sapiens GN=SRD5A3 PE=1 SV=1 - [PORED_HUMAN]
	942	O60238	BCL2/adenovirus E1B 19 kDa protein-interacting protein 3-like OS=Homo sapiens GN=BNIP3L PE=1 SV=1 - [BNI3L_HUMAN]
	943	Q8NG06	Tripartite motif-containing protein 58 OS=Homo sapiens GN=TRIM58 PE=2 SV=2 - [TRI58_HUMAN]
	944	Q15629	Translocating chain-associated membrane protein 1 OS=Homo sapiens GN=TRAM1 PE=1 SV=3 - [TRAM1_HUMAN]
	945	Q8NHP1-2	Isoform 2 of Aflatoxin B1 aldehyde reductase member 4 OS=Homo sapiens GN=AKR7L - [ARK74_HUMAN]
	946	P98161-2	Isoform 2 of Polycystin-1 OS=Homo sapiens GN=PKD1 - [PKD1_HUMAN]
	947	Q9UKJ1	Paired immunoglobulin-like type 2 receptor alpha OS=Homo sapiens GN=PILRA PE=1 SV=3 - [PILRA_HUMAN]
	948	Q9NZZ3	Charged multivesicular body protein 5 OS=Homo sapiens GN=CHMP5 PE=1 SV=1 - [CHMP5_HUMAN]
	949	Q9HAP2-3	Isoform 3 of MLX-interacting protein OS=Homo sapiens GN=MLXIP - [MLXIP_HUMAN]
	950	Q9UM21	Alpha-1,3-mannosyl-glycoprotein 4-beta-N-acetylglucosaminyltransferase A OS=Homo sapiens GN=MGAT4A PE=1 SV=1 - [MGT4A_HUMAN]
	951	P41180-2	Isoform 2 of Extracellular calcium-sensing receptor OS=Homo sapiens GN=CASR - [CASR_HUMAN]
	952	Q5JNZ3	Zinc finger protein 311 OS=Homo sapiens GN=ZNF311 PE=2 SV=2 - [ZN311_HUMAN]
	953	Q8TCC7-3	Isoform 3 of Solute carrier family 22 member 8 OS=Homo sapiens GN=SLC22A8 - [S22A8_HUMAN]
	954	P56192	Methionine--tRNA ligase, cytoplasmic OS=Homo sapiens GN=MARS PE=1 SV=2 - [SYMC_HUMAN]
	955	O95365	Zinc finger and BTB domain-containing protein 7A OS=Homo sapiens GN=ZBTB7A PE=1 SV=1 - [ZBT7A_HUMAN]
	956	Q9BQ31	Potassium voltage-gated channel subfamily S member 3 OS=Homo sapiens GN=KCNS3 PE=2 SV=3 - [KCNS3_HUMAN]
	957	Q9Y5G4	Protocadherin gamma-A9 OS=Homo sapiens GN=PCDHGA9 PE=2 SV=1 - [PCDG9_HUMAN]
	958	Q96KQ4	Apoptosis-stimulating of p53 protein 1 OS=Homo sapiens GN=PPP1R13B PE=1 SV=3 - [ASPP1_HUMAN]
	959	Q96N64	PWWP domain-containing protein 2A OS=Homo sapiens GN=PWWP2A PE=1 SV=2 - [PWP2A_HUMAN]
	960	Q86WK7	Amphoterin-induced protein 3 OS=Homo sapiens GN=AMIGO3 PE=2 SV=1 - [AMGO3_HUMAN]
	961	Q9NZP6	Nuclear pore-associated protein 1 OS=Homo sapiens GN=NPAP1 PE=1 SV=2 - [NPAP1_HUMAN]
	962	Q8N3A8	Poly [ADP-ribose] polymerase 8 OS=Homo sapiens GN=PARP8 PE=2 SV=1 - [PARP8_HUMAN]
	963	Q7Z3S7-5	Isoform 5 of Voltage-dependent calcium channel subunit alpha-2/delta-4 OS=Homo sapiens GN=CACNA2D4 - [CA2D4_HUMAN]
	964	Q8WV92	MIT domain-containing protein 1 OS=Homo sapiens GN=MITD1 PE=1 SV=1 - [MITD1_HUMAN]
	965	Q9H4K7	Mitochondrial ribosome-associated GTPase 2 OS=Homo sapiens GN=MTG2 PE=1 SV=1 - [MTG2_HUMAN]
	966	Q8N2Y8	Iporin OS=Homo sapiens GN=RUSC2 PE=1 SV=3 - [RUSC2_HUMAN]
	967	P30279	G1/S-specific cyclin-D2 OS=Homo sapiens GN=CCND2 PE=1 SV=1 - [CCND2_HUMAN]
	968	P49914	5-formyltetrahydrofolate cyclo-ligase OS=Homo sapiens GN=MTHFS PE=1 SV=2 - [MTHFS_HUMAN]
	969	Q96NA8	t-SNARE domain-containing protein 1 OS=Homo sapiens GN=TSNARE1 PE=2 SV=2 - [TSNA1_HUMAN]
	970	P78316	Nucleolar protein 14 OS=Homo sapiens GN=NOP14 PE=1 SV=3 - [NOP14_HUMAN]
	971	A6BM72	Multiple epidermal growth factor-like domains protein 11 OS=Homo sapiens GN=MEGF11 PE=2 SV=3 - [MEG11_HUMAN]
	972	P41218	Myeloid cell nuclear differentiation antigen OS=Homo sapiens GN=MNDA PE=1 SV=1 - [MNDA_HUMAN]
	973	P19022	Cadherin-2 OS=Homo sapiens GN=CDH2 PE=1 SV=4 - [CADH2_HUMAN]
	974	Q9H0C3	Transmembrane protein 117 OS=Homo sapiens GN=TMEM117 PE=2 SV=1 - [TM117_HUMAN]
	975	O75844	CAAX prenyl protease 1 homolog OS=Homo sapiens GN=ZMPSTE24 PE=1 SV=2 - [FACE1_HUMAN]
	976	O75964	ATP synthase subunit g, mitochondrial OS=Homo sapiens GN=ATP5L PE=1 SV=3 - [ATP5L_HUMAN]
	977	O60641	Clathrin coat assembly protein AP180 OS=Homo sapiens GN=SNAP91 PE=1 SV=2 - [AP180_HUMAN]
	978	Q9H5V8	CUB domain-containing protein 1 OS=Homo sapiens GN=CDCP1 PE=1 SV=3 - [CDCP1_HUMAN]
	979	Q9HCU5	Prolactin regulatory element-binding protein OS=Homo sapiens GN=PREB PE=1 SV=2 - [PREB_HUMAN]
	980	Q8TB96	T-cell immunomodulatory protein OS=Homo sapiens GN=ITFG1 PE=1 SV=1 - [TIP_HUMAN]
	981	Q86WA9	Sodium-independent sulfate anion transporter OS=Homo sapiens GN=SLC26A11 PE=1 SV=2 - [S2611_HUMAN]
	982	P98073	Enteropeptidase OS=Homo sapiens GN=TMPRSS15 PE=1 SV=3 - [ENTK_HUMAN]
	983	Q8N8Z3	Proline-rich protein 26 OS=Homo sapiens GN=PRR26 PE=2 SV=1 - [PRR26_HUMAN]
	984	Q03519	Antigen peptide transporter 2 OS=Homo sapiens GN=TAP2 PE=1 SV=1 - [TAP2_HUMAN]
	985	Q15041	ADP-ribosylation factor-like protein 6-interacting protein 1 OS=Homo sapiens GN=ARL6IP1 PE=1 SV=2 - [AR6P1_HUMAN]
	986	Q96KG7	Multiple epidermal growth factor-like domains protein 10 OS=Homo sapiens GN=MEGF10 PE=1 SV=1 - [MEG10_HUMAN]
	987	Q9C0H2	Protein tweety homolog 3 OS=Homo sapiens GN=TTYH3 PE=1 SV=3 - [TTYH3_HUMAN]
	988	Q13606	Olfactory receptor 5I1 OS=Homo sapiens GN=OR5I1 PE=2 SV=1 - [OR5I1_HUMAN]
	989	Q8N815	Cyclin N-terminal domain-containing protein 1 OS=Homo sapiens GN=CNTD1 PE=2 SV=2 - [CNTD1_HUMAN]
	990	Q15238	Pregnancy-specific beta-1-glycoprotein 5 OS=Homo sapiens GN=PSG5 PE=1 SV=3 - [PSG5_HUMAN]
	991	A6NGA9	Transmembrane protein 202 OS=Homo sapiens GN=TMEM202 PE=2 SV=1 - [TM202_HUMAN]
	992	Q9HCM3	UPF0606 protein KIAA1549 OS=Homo sapiens GN=KIAA1549 PE=1 SV=4 - [K1549_HUMAN]
	993	A6NJW4	Leucine-rich repeat-containing protein 3C OS=Homo sapiens GN=LRRC3C PE=2 SV=2 - [LRR3C_HUMAN]
	994	Q8IZA0	Dyslexia-associated protein KIAA0319-like protein OS=Homo sapiens GN=KIAA0319L PE=1 SV=2 - [K319L_HUMAN]
	995	O60831	PRA1 family protein 2 OS=Homo sapiens GN=PRAF2 PE=1 SV=1 - [PRAF2_HUMAN]
	996	Q6BAA4	Fc receptor-like B OS=Homo sapiens GN=FCRLB PE=1 SV=1 - [FCRLB_HUMAN]
	997	Q8N7R1	POM121-like protein 12 OS=Homo sapiens GN=POM121L12 PE=2 SV=3 - [P1L12_HUMAN]
	998	Q68CP9	AT-rich interactive domain-containing protein 2 OS=Homo sapiens GN=ARID2 PE=1 SV=2 - [ARID2_HUMAN]
	999	Q7RTT3	Protein SSX9 OS=Homo sapiens GN=SSX9 PE=2 SV=1 - [SSX9_HUMAN]
	1000	Q9Y3T9	Nucleolar complex protein 2 homolog OS=Homo sapiens GN=NOC2L PE=1 SV=4 - [NOC2L_HUMAN]
	1001	O95677-2	Isoform 2 of Eyes absent homolog 4 OS=Homo sapiens GN=EYA4 - [EYA4_HUMAN]
	1002	Q86VE0	Myb-related transcription factor, partner of profilin OS=Homo sapiens GN=MYPOP PE=2 SV=2 - [MYPOP_HUMAN]
	1003	P18583-5	Isoform D of Protein SON OS=Homo sapiens GN=SON - [SON_HUMAN]
	1004	Q9UPY6	Wiskott-Aldrich syndrome protein family member 3 OS=Homo sapiens GN=WASF3 PE=1 SV=2 - [WASF3_HUMAN]
	1005	O95292	Vesicle-associated membrane protein-associated protein B/C OS=Homo sapiens GN=VAPB PE=1 SV=3 - [VAPB_HUMAN]
	1006	O95104-2	Isoform 2 of Splicing factor, arginine/serine-rich 15 OS=Homo sapiens GN=SCAF4 - [SFR15_HUMAN]
	1007	O00590	Chemokine-binding protein 2 OS=Homo sapiens GN=CCBP2 PE=2 SV=2 - [CCBP2_HUMAN]
	1008	P09603	Macrophage colony-stimulating factor 1 OS=Homo sapiens GN=CSF1 PE=1 SV=2 - [CSF1_HUMAN]
	1009	Q969X1	Protein lifeguard 3 OS=Homo sapiens GN=TMBIM1 PE=1 SV=2 - [LFG3_HUMAN]
	1010	Q9BUD6	Spondin-2 OS=Homo sapiens GN=SPON2 PE=1 SV=3 - [SPON2_HUMAN]
	1011	Q13887	Krueppel-like factor 5 OS=Homo sapiens GN=KLF5 PE=1 SV=2 - [KLF5_HUMAN]
	1012	Q8NGF0	Olfactory receptor 52B6 OS=Homo sapiens GN=OR52B6 PE=2 SV=3 - [O52B6_HUMAN]
	1013	P58180	Olfactory receptor 4D2 OS=Homo sapiens GN=OR4D2 PE=2 SV=1 - [OR4D2_HUMAN]
	1014	Q7Z5P9	Mucin-19 OS=Homo sapiens GN=MUC19 PE=1 SV=2 - [MUC19_HUMAN]
	1015	P53680	AP-2 complex subunit sigma OS=Homo sapiens GN=AP2S1 PE=1 SV=2 - [AP2S1_HUMAN]
	1016	Q9HA65	TBC1 domain family member 17 OS=Homo sapiens GN=TBC1D17 PE=1 SV=2 - [TBC17_HUMAN]
	1017	O75901	Ras association domain-containing protein 9 OS=Homo sapiens GN=RASSF9 PE=2 SV=2 - [RASF9_HUMAN]
	1018	Q6W4X9	Mucin-6 OS=Homo sapiens GN=MUC6 PE=1 SV=3 - [MUC6_HUMAN]
	1019	P08100	Rhodopsin OS=Homo sapiens GN=RHO PE=1 SV=1 - [OPSD_HUMAN]
	1020	P15151	Poliovirus receptor OS=Homo sapiens GN=PVR PE=1 SV=2 - [PVR_HUMAN]
	1021	Q6X4U4	Sclerostin domain-containing protein 1 OS=Homo sapiens GN=SOSTDC1 PE=1 SV=2 - [SOSD1_HUMAN]
	1022	O43920	NADH dehydrogenase [ubiquinone] iron-sulfur protein 5 OS=Homo sapiens GN=NDUFS5 PE=1 SV=3 - [NDUS5_HUMAN]
	1023	Q9NVD7	Alpha-parvin OS=Homo sapiens GN=PARVA PE=1 SV=1 - [PARVA_HUMAN]
	1024	Q9BYN7-2	Isoform 2 of Zinc finger protein 341 OS=Homo sapiens GN=ZNF341 - [ZN341_HUMAN]
	1025	Q8NGF9	Olfactory receptor 4X2 OS=Homo sapiens GN=OR4X2 PE=2 SV=1 - [OR4X2_HUMAN]
	1026	P57073	Transcription factor SOX-8 OS=Homo sapiens GN=SOX8 PE=2 SV=1 - [SOX8_HUMAN]
	1027	Q9NZW4	Dentin sialophosphoprotein OS=Homo sapiens GN=DSPP PE=1 SV=2 - [DSPP_HUMAN]
	1028	P00403	Cytochrome c oxidase subunit 2 OS=Homo sapiens GN=MT-CO2 PE=1 SV=1 - [COX2_HUMAN]
	1029	Q9HBD1-5	Isoform 5 of Roquin-2 OS=Homo sapiens GN=RC3H2 - [RC3H2_HUMAN]
	1030	A6ND48	Olfactory receptor 14I1 OS=Homo sapiens GN=OR14I1 PE=2 SV=1 - [O14I1_HUMAN]
	1031	Q685J3	Mucin-17 OS=Homo sapiens GN=MUC17 PE=1 SV=2 - [MUC17_HUMAN]
	1032	P20962	Parathymosin OS=Homo sapiens GN=PTMS PE=1 SV=2 - [PTMS_HUMAN]
	1033	Q8NG98	Olfactory receptor 7D4 OS=Homo sapiens GN=OR7D4 PE=2 SV=1 - [OR7D4_HUMAN]
	1034	P29373	Cellular retinoic acid-binding protein 2 OS=Homo sapiens GN=CRABP2 PE=1 SV=2 - [RABP2_HUMAN]
