# Supplementary material for: Global extracellular vesicle proteomic signature defines U87-MG glioma cell hypoxic status with potential implications for non-invasive diagnostics
Source: J Neurooncol. 2019 Aug 14;144(3):477–88. doi: 10.1007/s11060-019-03262-4 (PMC6764937; doi:10.1007/s11060-019-03262-4)
Supplement: Supplementary file 10 — Supplementary file10 (XLSX 47 kb) [file 11060_2019_3262_MOESM10_ESM.xlsx]

## Sheet: Sheet1
	Supplementary Table 6. Abundance of proteins identified in EVs isolated from normoxia and hypoxia U87 glioblastoma
	cells as determined by label free quantification (LFQ) of LC/MS precursor peaks using Proteome Discoverer (PD) version 2.2.
	No.	Accession	Abundance Ratio: (Hypoxia) / (Normoxia)	log2: (H) / (N)	P-value: (H) / (N)	log10 P-value: (H) / (N)
	1	P17936	5.402	2.43	1e-17	-17
	2	Q9BRX2	3.81	1.93	3.83433e-11	-10.4163
	3	Q15645	3.543	1.82	4.26958e-10	-9.36962
	4	P13726	3.304	1.72	3.82549e-09	-8.41731
	5	P02794	2.921	1.55	1.36867e-07	-6.8637
	6	P05121	2.639	1.4	1.95512e-06	-5.70883
	7	Q9Y4K0	2.544	1.35	4.80308e-06	-5.31848
	8	Q9H0U4	2.5	1.32	7.32249e-06	-5.13534
	9	P11166	2.42	1.27	1.56388e-05	-4.8058
	10	P20290	2.39	1.26	2.07746e-05	-4.68247
	11	P38606	2.331	1.22	3.60426e-05	-4.44318
	12	P54136	2.288	1.19	5.42866e-05	-4.26531
	13	Q13111	2.108	1.08	0.000291016	-3.53608
	14	P52823	2.073	1.05	0.000400533	-3.39736
	15	Q15738	2.025	1.02	0.000622858	-3.20561
	16	O15355	2.019	1.01	0.000658075	-3.18172
	17	Q92597	2.013	1.01	0.000697317	-3.15657
	18	O00499	1.943	0.96	0.00131901	-2.87975
	19	Q01105	1.873	0.91	0.00247783	-2.60593
	20	O43747	1.868	0.9	0.00259604	-2.58569
	21	O43570	1.855	0.89	0.00290164	-2.53736
	22	P10451	1.854	0.89	0.00293385	-2.53256
	23	P07814	1.821	0.87	0.00390221	-2.40869
	24	P06748	1.809	0.86	0.00434809	-2.3617
	25	O75844	1.796	0.85	0.00486421	-2.31299
	26	P63313	1.792	0.84	0.00505995	-2.29585
	27	Q8WV92	1.785	0.84	0.00538394	-2.2689
	28	P57088	1.776	0.83	0.00582502	-2.2347
	29	P13645	1.774	0.83	0.00589983	-2.22916
	30	P19338	1.757	0.81	0.00685468	-2.16401
	31	Q9NV70	1.754	0.81	0.00700915	-2.15433
	32	P35527	1.749	0.81	0.00731879	-2.13556
	33	Q6DD88	1.744	0.8	0.00763127	-2.1174
	34	P48060	1.724	0.79	0.00912622	-2.03971
	35	Q12797	1.721	0.78	0.00937173	-2.02818
	36	O75915	1.715	0.78	0.00982073	-2.00786
	37	A6NHL2	1.686	0.75	0.0125248	-1.90223
	38	O94979	1.68	0.75	0.0132592	-1.87748
	39	P14314	1.649	0.72	0.0170868	-1.76734
	40	Q03405	1.634	0.71	0.019347	-1.71339
	41	Q9NP72	1.626	0.7	0.0207478	-1.68303
	42	Q6NZI2	1.622	0.7	0.0214882	-1.6678
	43	Q04844	1.608	0.69	0.0240525	-1.61884
	44	P55042	1.602	0.68	0.0252924	-1.59701
	45	P31641	1.601	0.68	0.0253766	-1.59557
	46	Q9UBQ5	1.588	0.67	0.0281978	-1.54978
	47	Q99961	1.577	0.66	0.0308533	-1.5107
	48	P10620	1.574	0.65	0.0317191	-1.49868
	49	O60462	1.571	0.65	0.0323934	-1.48954
	50	Q07021	1.57	0.65	0.0327403	-1.48492
	51	Q9UHD8	1.565	0.65	0.0339886	-1.46867
	52	P52434	1.565	0.65	0.0340437	-1.46796
	53	P60983	1.565	0.65	0.0340528	-1.46785
	54	Q9NRW3	1.565	0.65	0.0341457	-1.46666
	55	P53990	1.559	0.64	0.0355504	-1.44916
	56	O43852	1.548	0.63	0.0390043	-1.40889
	57	Q12965	1.546	0.63	0.0394864	-1.40355
	58	P10644	1.54	0.62	0.0415773	-1.38114
	59	Q12905	1.538	0.62	0.0420378	-1.37636
	60	Q96HE7	1.538	0.62	0.0421116	-1.3756
	61	P04179	1.532	0.62	0.0441074	-1.35549
	62	P30566	1.524	0.61	0.0470152	-1.32776
	63	P14678	1.523	0.61	0.0472767	-1.32535
	64	Q9NRY6	1.523	0.61	0.0474509	-1.32376
	65	O15371	1.521	0.61	0.0480205	-1.31857
	66	Q8IUW5	1.516	0.6	0.0499963	-1.30106
	67	P27797	1.514	0.6	0.0509957	-1.29247
	68	P30048	1.503	0.59	0.0554634	-1.25599
	69	O75955	1.502	0.59	0.0558919	-1.25265
	70	Q8TD10	1.501	0.59	0.0562512	-1.24987
	71	O14880	1.494	0.58	0.0592791	-1.2271
	72	P20585	1.491	0.58	0.0608843	-1.21549
	73	Q03135	1.49	0.58	0.0611552	-1.21357
	74	Q9NWQ8	1.488	0.57	0.0621219	-1.20676
	75	O75340	1.474	0.56	0.069013	-1.16107
	76	Q07955	1.471	0.56	0.0707711	-1.15014
	77	P23284	1.468	0.55	0.0725759	-1.13921
	78	Q6IBS0	1.464	0.55	0.0747711	-1.12627
	79	Q96AY3	1.459	0.55	0.0773369	-1.11161
	80	P15692	1.458	0.54	0.0782477	-1.10653
	81	O15173	1.456	0.54	0.0790391	-1.10216
	82	P04264	1.456	0.54	0.0794419	-1.09995
	83	Q9UN37	1.448	0.53	0.0837409	-1.07706
	84	O96019	1.446	0.53	0.0852249	-1.06943
	85	P11908	1.445	0.53	0.0859389	-1.06581
	86	Q13347	1.445	0.53	0.0860101	-1.06545
	87	Q9H444	1.436	0.52	0.0921517	-1.0355
	88	Q15293	1.435	0.52	0.0928688	-1.03213
	89	Q13637	1.422	0.51	0.10214	-0.990806
	90	P28070	1.419	0.5	0.104136	-0.9824
	91	Q15582	1.418	0.5	0.104869	-0.979355
	92	O00264	1.414	0.5	0.107918	-0.966908
	93	P20962	1.412	0.5	0.109686	-0.959848
	94	Q9NZN4	1.411	0.5	0.110511	-0.956595
	95	P31431	1.409	0.49	0.112148	-0.95021
	96	P07237	1.407	0.49	0.113206	-0.94613
	97	P07919	1.405	0.49	0.114879	-0.939758
	98	P40926	1.404	0.49	0.11633	-0.934307
	99	P27824	1.403	0.49	0.116871	-0.932292
	100	O15427	1.401	0.49	0.118062	-0.927888
	101	Q16790	1.401	0.49	0.118143	-0.927592
	102	Q16181	1.399	0.48	0.120533	-0.918893
	103	Q658P3	1.396	0.48	0.122797	-0.910813
	104	Q8TDB8	1.394	0.48	0.124378	-0.905256
	105	O14964	1.393	0.48	0.125519	-0.901291
	106	P07602	1.389	0.47	0.129298	-0.88841
	107	P61604	1.387	0.47	0.130862	-0.883187
	108	P01023	1.383	0.47	0.134214	-0.872202
	109	P21796	1.383	0.47	0.134427	-0.871512
	110	P00441	1.382	0.47	0.136038	-0.866341
	111	O14980	1.38	0.46	0.137941	-0.860306
	112	Q16891	1.377	0.46	0.140206	-0.853233
	113	Q562R1	1.376	0.46	0.141004	-0.85077
	114	Q9C0H2	1.376	0.46	0.14142	-0.849488
	115	Q92499	1.373	0.46	0.144458	-0.84026
	116	Q15084	1.373	0.46	0.144817	-0.83918
	117	O75369	1.372	0.46	0.145211	-0.838001
	118	O43854	1.368	0.45	0.149465	-0.82546
	119	O14950	1.364	0.45	0.154107	-0.812177
	120	P30049	1.363	0.45	0.155169	-0.809196
	121	O00560	1.36	0.44	0.157736	-0.80207
	122	P13640	1.36	0.44	0.157798	-0.801899
	123	O60884	1.359	0.44	0.159215	-0.798016
	124	P61158	1.357	0.44	0.16177	-0.791103
	125	Q99733	1.355	0.44	0.164181	-0.784678
	126	P48029	1.352	0.44	0.166649	-0.778196
	127	P30101	1.352	0.44	0.166962	-0.777383
	128	O15260	1.348	0.43	0.171374	-0.766056
	129	P46459	1.347	0.43	0.173021	-0.761902
	130	P60903	1.343	0.43	0.177303	-0.751284
	131	Q9NZZ3	1.341	0.42	0.179744	-0.745346
	132	Q13641	1.338	0.42	0.184408	-0.734221
	133	Q92820	1.334	0.42	0.188852	-0.723879
	134	P53618	1.334	0.42	0.189387	-0.722649
	135	Q8TF09	1.333	0.42	0.189762	-0.72179
	136	P07355	1.332	0.41	0.191456	-0.717931
	137	P09972	1.33	0.41	0.193694	-0.712884
	138	Q15149	1.328	0.41	0.196752	-0.706081
	139	P00403	1.326	0.41	0.199441	-0.700185
	140	Q8NBS9	1.319	0.4	0.208585	-0.680717
	141	P52789	1.319	0.4	0.209009	-0.679836
	142	P84103	1.316	0.4	0.21362	-0.670359
	143	Q9Y230	1.308	0.39	0.224376	-0.649024
	144	P05387	1.304	0.38	0.230678	-0.636994
	145	P53985	1.303	0.38	0.232638	-0.63332
	146	P20073	1.3	0.38	0.23711	-0.625049
	147	P35232	1.299	0.38	0.2385	-0.622512
	148	Q9UNM6	1.298	0.38	0.239484	-0.620724
	149	O15372	1.298	0.38	0.23983	-0.620096
	150	Q9P265	1.297	0.38	0.2408	-0.618344
	151	P28482	1.296	0.37	0.242503	-0.615283
	152	P19623	1.296	0.37	0.243203	-0.614031
	153	Q96J84	1.295	0.37	0.245026	-0.610788
	154	P55884	1.294	0.37	0.246257	-0.608611
	155	O75477	1.292	0.37	0.248719	-0.604291
	156	P14868	1.292	0.37	0.249166	-0.603511
	157	Q9UBN6	1.291	0.37	0.251272	-0.599856
	158	P50454	1.291	0.37	0.251497	-0.599467
	159	Q5T4S7	1.29	0.37	0.252295	-0.598091
	160	Q7L2H7	1.287	0.36	0.256994	-0.590077
	161	P13473	1.287	0.36	0.257281	-0.589593
	162	P02792	1.287	0.36	0.257701	-0.588883
	163	Q00839	1.285	0.36	0.259793	-0.585373
	164	P02545	1.285	0.36	0.260146	-0.584782
	165	Q9BRL6	1.285	0.36	0.260945	-0.583451
	166	Q16650	1.284	0.36	0.262302	-0.581198
	167	Q13162	1.283	0.36	0.264163	-0.578128
	168	Q95604	1.281	0.36	0.266684	-0.574003
	169	P17252	1.28	0.36	0.268828	-0.570526
	170	P0C0S8	1.275	0.35	0.277559	-0.556644
	171	Q14697	1.273	0.35	0.28059	-0.551928
	172	Q9UKK3	1.272	0.35	0.282326	-0.549249
	173	Q15019	1.271	0.35	0.285521	-0.544361
	174	P13010	1.267	0.34	0.29146	-0.535422
	175	P30040	1.266	0.34	0.293603	-0.532239
	176	B5ME19	1.266	0.34	0.293993	-0.531663
	177	P61020	1.266	0.34	0.294011	-0.531637
	178	O60814	1.263	0.34	0.298517	-0.52503
	179	Q05682	1.263	0.34	0.298589	-0.524926
	180	P25705	1.263	0.34	0.299908	-0.523012
	181	Q00325	1.261	0.33	0.303292	-0.51814
	182	P17302	1.26	0.33	0.305194	-0.515423
	183	O14817	1.258	0.33	0.308469	-0.510788
	184	P62195	1.257	0.33	0.311551	-0.506471
	185	O00468	1.254	0.33	0.316295	-0.499908
	186	Q13561	1.252	0.32	0.319902	-0.494983
	187	O43633	1.251	0.32	0.321443	-0.492896
	188	P63000	1.251	0.32	0.321476	-0.492852
	189	P08670	1.251	0.32	0.321731	-0.492508
	190	P80303	1.251	0.32	0.323141	-0.490608
	191	P21964	1.25	0.32	0.323639	-0.489939
	192	Q8WXE9	1.25	0.32	0.324923	-0.488219
	193	Q99623	1.249	0.32	0.325733	-0.487139
	194	P18621	1.249	0.32	0.327145	-0.48526
	195	P36021	1.248	0.32	0.32809	-0.484007
	196	P60900	1.248	0.32	0.329187	-0.482557
	197	P41252	1.247	0.32	0.330887	-0.48032
	198	P09429	1.247	0.32	0.331338	-0.479729
	199	P13667	1.246	0.32	0.332744	-0.47789
	200	O75367	1.243	0.31	0.33755	-0.471662
	201	P47897	1.243	0.31	0.337883	-0.471233
	202	O75954	1.242	0.31	0.339889	-0.468663
	203	P08133	1.241	0.31	0.342219	-0.465696
	204	P08758	1.24	0.31	0.344453	-0.46287
	205	P14625	1.239	0.31	0.345797	-0.461179
	206	Q14315	1.238	0.31	0.348392	-0.457932
	207	P11766	1.235	0.3	0.354911	-0.44988
	208	P02768	1.235	0.3	0.355537	-0.449115
	209	P06576	1.232	0.3	0.360639	-0.442927
	210	P61106	1.232	0.3	0.361855	-0.441466
	211	P35579	1.227	0.3	0.371567	-0.429962
	212	P16401	1.226	0.29	0.374694	-0.426323
	213	O43795	1.225	0.29	0.376636	-0.424078
	214	P04843	1.225	0.29	0.377689	-0.422866
	215	P49757	1.225	0.29	0.37787	-0.422657
	216	P15559	1.224	0.29	0.378813	-0.421575
	217	O43707	1.222	0.29	0.383403	-0.416344
	218	P05388	1.219	0.29	0.390418	-0.40847
	219	P09104	1.219	0.29	0.391074	-0.407741
	220	O60493	1.217	0.28	0.394884	-0.403531
	221	P18124	1.217	0.28	0.395592	-0.402753
	222	Q16851	1.217	0.28	0.396195	-0.402091
	223	Q92973	1.216	0.28	0.39715	-0.401046
	224	P17987	1.216	0.28	0.397404	-0.400768
	225	P84243	1.213	0.28	0.404436	-0.39315
	226	P62633	1.213	0.28	0.40528	-0.392245
	227	P09651	1.212	0.28	0.405572	-0.391932
	228	P67775	1.212	0.28	0.407659	-0.389703
	229	P28074	1.21	0.27	0.412087	-0.385011
	230	Q14204	1.208	0.27	0.41542	-0.381513
	231	P50570	1.208	0.27	0.416283	-0.380611
	232	Q08431	1.208	0.27	0.417288	-0.379564
	233	P62979	1.207	0.27	0.417658	-0.379179
	234	Q15185	1.207	0.27	0.418317	-0.378495
	235	P60660	1.206	0.27	0.420665	-0.376064
	236	P67809	1.204	0.27	0.425491	-0.37111
	237	P49411	1.204	0.27	0.426205	-0.370382
	238	Q13418	1.204	0.27	0.42705	-0.369522
	239	P04844	1.201	0.26	0.432618	-0.363895
	240	Q14764	1.2	0.26	0.436603	-0.359913
	241	P15151	1.199	0.26	0.437173	-0.359347
	242	P00558	1.199	0.26	0.438601	-0.35793
	243	Q92692	1.198	0.26	0.439779	-0.356765
	244	O15143	1.198	0.26	0.44166	-0.354912
	245	P10809	1.196	0.26	0.444938	-0.3517
	246	P25788	1.196	0.26	0.44616	-0.35051
	247	P62191	1.195	0.26	0.447279	-0.349422
	248	P21399	1.195	0.26	0.448023	-0.3487
	249	Q9HCJ6	1.195	0.26	0.448807	-0.34794
	250	P62805	1.193	0.25	0.454313	-0.342645
	251	P48556	1.192	0.25	0.454819	-0.342162
	252	P20645	1.192	0.25	0.456147	-0.340896
	253	O00303	1.192	0.25	0.456838	-0.340238
	254	Q5T9A4	1.191	0.25	0.458908	-0.338274
	255	Q01813	1.191	0.25	0.458996	-0.338191
	256	P08253	1.191	0.25	0.459554	-0.337664
	257	O43865	1.19	0.25	0.460202	-0.337052
	258	P33176	1.189	0.25	0.464346	-0.333158
	259	Q9NZM1	1.188	0.25	0.466209	-0.331419
	260	Q6P9B6	1.188	0.25	0.466665	-0.330995
	261	Q9BSJ8	1.186	0.25	0.471213	-0.326783
	262	P19367	1.185	0.25	0.47269	-0.325424
	263	P07910	1.185	0.24	0.474106	-0.324125
	264	Q15942	1.184	0.24	0.476946	-0.321531
	265	P21333	1.183	0.24	0.478248	-0.320347
	266	O43399	1.183	0.24	0.479029	-0.319638
	267	P11172	1.181	0.24	0.484354	-0.314837
	268	P29692	1.181	0.24	0.484446	-0.314755
	269	Q9UKK9	1.18	0.24	0.486513	-0.312905
	270	O60701	1.179	0.24	0.488832	-0.31084
	271	Q8TF66	1.179	0.24	0.490168	-0.309655
	272	P12814	1.179	0.24	0.490308	-0.309531
	273	A0AVT1	1.178	0.24	0.492025	-0.308013
	274	P11279	1.177	0.24	0.494852	-0.305525
	275	P12956	1.177	0.24	0.495159	-0.305255
	276	P67936	1.177	0.24	0.495306	-0.305127
	277	P08123	1.176	0.23	0.499294	-0.301643
	278	Q9UMQ6	1.175	0.23	0.49952	-0.301447
	279	Q8WUM4	1.175	0.23	0.499999	-0.301031
	280	P04075	1.174	0.23	0.502795	-0.298609
	281	Q99653	1.174	0.23	0.503517	-0.297986
	282	P45880	1.173	0.23	0.505702	-0.296105
	283	P18077	1.173	0.23	0.506983	-0.295007
	284	A6NHG4	1.172	0.23	0.50818	-0.293982
	285	P63244	1.171	0.23	0.512095	-0.29065
	286	O15460	1.171	0.23	0.512895	-0.289971
	287	O14818	1.17	0.23	0.513544	-0.289423
	288	Q9P2J5	1.17	0.23	0.513749	-0.289249
	289	O43242	1.169	0.23	0.517689	-0.285931
	290	P28072	1.169	0.22	0.518323	-0.2854
	291	P09496	1.169	0.22	0.51871	-0.285076
	292	P11021	1.168	0.22	0.518851	-0.284957
	293	P00338	1.168	0.22	0.519874	-0.284102
	294	Q13501	1.167	0.22	0.521647	-0.282623
	295	P47895	1.166	0.22	0.526593	-0.278525
	296	P35998	1.164	0.22	0.53152	-0.27448
	297	P62136	1.163	0.22	0.53383	-0.272597
	298	P53621	1.163	0.22	0.534887	-0.271738
	299	Q99832	1.163	0.22	0.534958	-0.27168
	300	O75947	1.163	0.22	0.535642	-0.271126
	301	P07437	1.162	0.22	0.536277	-0.270611
	302	P19022	1.162	0.22	0.536632	-0.270324
	303	Q09666	1.161	0.21	0.541498	-0.266404
	304	P61254	1.16	0.21	0.541754	-0.266198
	305	P51159	1.159	0.21	0.545279	-0.263382
	306	P20042	1.159	0.21	0.545988	-0.262817
	307	P61163	1.159	0.21	0.547014	-0.262002
	308	P04004	1.156	0.21	0.55334	-0.257008
	309	Q13838	1.155	0.21	0.556611	-0.254448
	310	P07339	1.155	0.21	0.556881	-0.254238
	311	Q14152	1.155	0.21	0.558256	-0.253166
	312	P07384	1.155	0.21	0.558261	-0.253163
	313	P32856	1.155	0.21	0.558535	-0.25295
	314	P52799	1.153	0.21	0.562522	-0.24986
	315	P34932	1.153	0.21	0.563279	-0.249276
	316	P55072	1.153	0.21	0.563419	-0.249169
	317	Q96AG4	1.152	0.2	0.566315	-0.246942
	318	Q07954	1.152	0.2	0.567307	-0.246182
	319	P04792	1.152	0.2	0.567621	-0.245941
	320	Q9UL25	1.151	0.2	0.569643	-0.244398
	321	P59998	1.15	0.2	0.571035	-0.243337
	322	Q00610	1.15	0.2	0.572615	-0.242137
	323	O00154	1.149	0.2	0.574256	-0.240895
	324	P08243	1.149	0.2	0.574848	-0.240447
	325	O15144	1.148	0.2	0.577412	-0.238514
	326	P39023	1.148	0.2	0.577587	-0.238382
	327	Q16186	1.146	0.2	0.583832	-0.233712
	328	P0C7P4	1.145	0.19	0.588728	-0.230085
	329	Q15286	1.144	0.19	0.588881	-0.229973
	330	Q9BUF5	1.144	0.19	0.590196	-0.229004
	331	Q9UBV8	1.141	0.19	0.598988	-0.222582
	332	Q06210	1.141	0.19	0.600455	-0.221519
	333	P78371	1.14	0.19	0.601243	-0.22095
	334	P52788	1.14	0.19	0.603119	-0.219597
	335	E9PAV3	1.139	0.19	0.604211	-0.218812
	336	P51571	1.138	0.19	0.609267	-0.215192
	337	P17858	1.138	0.19	0.61021	-0.21452
	338	P30626	1.137	0.19	0.611434	-0.213651
	339	P51148	1.137	0.18	0.612952	-0.212573
	340	P48643	1.136	0.18	0.615017	-0.211113
	341	P06454	1.135	0.18	0.616731	-0.209904
	342	P43034	1.135	0.18	0.6194	-0.208029
	343	P46940	1.134	0.18	0.619922	-0.207663
	344	P25786	1.134	0.18	0.621082	-0.206851
	345	Q9UK76	1.133	0.18	0.624818	-0.204247
	346	Q16629	1.133	0.18	0.626033	-0.203403
	347	Q6UVK1	1.132	0.18	0.626776	-0.202888
	348	O00487	1.132	0.18	0.627978	-0.202055
	349	P35241	1.132	0.18	0.628039	-0.202013
	350	P46778	1.131	0.18	0.630458	-0.200344
	351	P60033	1.131	0.18	0.632154	-0.199177
	352	P46777	1.13	0.18	0.632431	-0.198987
	353	P05141	1.13	0.18	0.633274	-0.198408
	354	O94808	1.13	0.18	0.634673	-0.19745
	355	P46781	1.129	0.18	0.636571	-0.196153
	356	P49591	1.129	0.17	0.638601	-0.19477
	357	P13591	1.128	0.17	0.63983	-0.193936
	358	Q7KZF4	1.127	0.17	0.644477	-0.190792
	359	P51153	1.126	0.17	0.645317	-0.190227
	360	O75531	1.125	0.17	0.650571	-0.186705
	361	P29373	1.125	0.17	0.650816	-0.186542
	362	Q16555	1.123	0.17	0.655822	-0.183214
	363	P35240	1.122	0.17	0.66014	-0.180364
	364	P02774	1.122	0.17	0.660994	-0.179802
	365	Q15813	1.119	0.16	0.670901	-0.173342
	366	P04632	1.118	0.16	0.6729	-0.172049
	367	P53004	1.118	0.16	0.673875	-0.17142
	368	Q07866	1.116	0.16	0.679335	-0.167916
	369	P61221	1.116	0.16	0.680262	-0.167324
	370	P13798	1.116	0.16	0.680431	-0.167216
	371	Q969P0	1.114	0.16	0.684631	-0.164544
	372	P36871	1.114	0.16	0.68757	-0.162683
	373	Q9BX67	1.113	0.15	0.690714	-0.160702
	374	P50990	1.112	0.15	0.692215	-0.159759
	375	Q16531	1.112	0.15	0.692222	-0.159755
	376	P53999	1.11	0.15	0.698129	-0.156064
	377	Q9Y224	1.11	0.15	0.699813	-0.155018
	378	O00410	1.109	0.15	0.704265	-0.152264
	379	P48637	1.108	0.15	0.704712	-0.151989
	380	Q9Y265	1.108	0.15	0.704782	-0.151945
	381	O00194	1.108	0.15	0.706311	-0.151004
	382	P26641	1.106	0.15	0.712453	-0.147244
	383	P22695	1.106	0.15	0.713428	-0.14665
	384	Q9Y262	1.106	0.14	0.714343	-0.146093
	385	Q92542	1.106	0.14	0.714437	-0.146036
	386	Q99816	1.104	0.14	0.718298	-0.143696
	387	P23396	1.104	0.14	0.718696	-0.143455
	388	P40227	1.104	0.14	0.719685	-0.142857
	389	P62424	1.104	0.14	0.719799	-0.142789
	390	P63167	1.104	0.14	0.719915	-0.142719
	391	P68366	1.104	0.14	0.720438	-0.142403
	392	P50914	1.103	0.14	0.722715	-0.141033
	393	P22234	1.103	0.14	0.723685	-0.14045
	394	O00469	1.103	0.14	0.724263	-0.140103
	395	Q9HD42	1.102	0.14	0.725265	-0.139503
	396	Q13200	1.102	0.14	0.726996	-0.138468
	397	P14618	1.102	0.14	0.727857	-0.137954
	398	P50991	1.101	0.14	0.729032	-0.137253
	399	P31949	1.101	0.14	0.730094	-0.136621
	400	Q13530	1.1	0.14	0.732459	-0.135217
	401	P02647	1.1	0.14	0.735019	-0.133701
	402	P53396	1.099	0.14	0.736494	-0.13283
	403	O75351	1.099	0.14	0.736766	-0.132671
	404	P01903	1.099	0.14	0.737474	-0.132253
	405	Q06830	1.098	0.14	0.739048	-0.131327
	406	Q02543	1.098	0.13	0.740872	-0.130257
	407	P49368	1.098	0.13	0.741698	-0.129773
	408	P62913	1.097	0.13	0.743547	-0.128692
	409	Q14203	1.096	0.13	0.748549	-0.12578
	410	P08238	1.095	0.13	0.750511	-0.124643
	411	Q9Y696	1.095	0.13	0.751799	-0.123899
	412	P00367	1.095	0.13	0.752189	-0.123673
	413	P35606	1.095	0.13	0.752482	-0.123504
	414	P08865	1.094	0.13	0.753399	-0.122975
	415	P0DP25	1.094	0.13	0.754185	-0.122522
	416	Q04637	1.093	0.13	0.758529	-0.120028
	417	Q15008	1.093	0.13	0.759061	-0.119724
	418	P29323	1.089	0.12	0.770528	-0.113212
	419	O95373	1.089	0.12	0.77332	-0.111641
	420	Q9BRA2	1.088	0.12	0.775127	-0.110627
	421	O75131	1.087	0.12	0.779956	-0.10793
	422	Q8WWI5	1.087	0.12	0.780911	-0.107399
	423	Q01081	1.086	0.12	0.782725	-0.106391
	424	P36405	1.086	0.12	0.783701	-0.105849
	425	O15145	1.086	0.12	0.78397	-0.105701
	426	P30085	1.084	0.12	0.790038	-0.102352
	427	P24534	1.084	0.12	0.790209	-0.102258
	428	P25205	1.084	0.12	0.790257	-0.102232
	429	P60709	1.082	0.11	0.795839	-0.0991749
	430	P20036	1.081	0.11	0.800338	-0.0967265
	431	P62328	1.081	0.11	0.801572	-0.0960573
	432	O95819	1.081	0.11	0.80161	-0.0960368
	433	P43686	1.08	0.11	0.805806	-0.0937693
	434	P84098	1.077	0.11	0.813788	-0.0894889
	435	P62847	1.077	0.11	0.814393	-0.0891659
	436	P56134	1.077	0.11	0.814406	-0.0891591
	437	Q99584	1.077	0.11	0.815365	-0.0886479
	438	P07741	1.077	0.11	0.816377	-0.0881092
	439	Q9H3K6	1.076	0.11	0.818337	-0.0870679
	440	P61764	1.075	0.1	0.820937	-0.0856903
	441	Q07020	1.075	0.1	0.822339	-0.0849489
	442	P09525	1.074	0.1	0.82459	-0.0837621
	443	P61769	1.073	0.1	0.828256	-0.0818354
	444	Q96QK1	1.073	0.1	0.830865	-0.0804696
	445	Q14108	1.072	0.1	0.832416	-0.0796598
	446	Q02790	1.072	0.1	0.833247	-0.0792261
	447	O60888	1.072	0.1	0.834619	-0.0785118
	448	Q9BSJ2	1.071	0.1	0.837765	-0.0768779
	449	P38646	1.071	0.1	0.837852	-0.0768325
	450	P68400	1.069	0.1	0.845668	-0.0728001
	451	P00533	1.068	0.09	0.848132	-0.0715368
	452	P46821	1.068	0.09	0.84895	-0.0711179
	453	P61353	1.068	0.09	0.849506	-0.0708335
	454	Q7L1Q6	1.067	0.09	0.853786	-0.0686508
	455	P68104	1.065	0.09	0.859467	-0.0657705
	456	P52292	1.065	0.09	0.860431	-0.0652839
	457	P36543	1.064	0.09	0.861511	-0.0647394
	458	Q9H4G4	1.064	0.09	0.862215	-0.0643847
	459	Q9Y3E7	1.064	0.09	0.862687	-0.0641468
	460	P02786	1.064	0.09	0.863055	-0.0639616
	461	Q13155	1.064	0.09	0.864483	-0.0632433
	462	P61247	1.063	0.09	0.866127	-0.0624185
	463	Q99471	1.063	0.09	0.867365	-0.0617979
	464	O60506	1.062	0.09	0.868851	-0.0610546
	465	Q71U36	1.062	0.09	0.869161	-0.0608999
	466	P62256	1.062	0.09	0.871226	-0.059869
	467	P21980	1.062	0.09	0.872044	-0.0594614
	468	P07900	1.06	0.08	0.876591	-0.0572029
	469	P62263	1.06	0.08	0.877819	-0.0565949
	470	Q14974	1.059	0.08	0.880572	-0.0552353
	471	O00231	1.059	0.08	0.881222	-0.0549147
	472	P62701	1.059	0.08	0.883507	-0.05379
	473	Q6ZVM7	1.058	0.08	0.886649	-0.0522484
	474	P04080	1.058	0.08	0.886657	-0.0522442
	475	P06733	1.058	0.08	0.886986	-0.0520833
	476	Q9NR31	1.057	0.08	0.888364	-0.0514092
	477	Q01518	1.057	0.08	0.889978	-0.0506206
	478	P62857	1.057	0.08	0.890038	-0.0505913
	479	P06744	1.056	0.08	0.891616	-0.049822
	480	P04406	1.056	0.08	0.891864	-0.0497012
	481	P46060	1.054	0.08	0.899053	-0.0462145
	482	P00387	1.054	0.08	0.899461	-0.0460178
	483	Q4KMP7	1.052	0.07	0.90793	-0.0419478
	484	Q9UNE7	1.051	0.07	0.910527	-0.0407071
	485	P16152	1.051	0.07	0.912229	-0.0398962
	486	P47756	1.05	0.07	0.914514	-0.0388097
	487	P49207	1.05	0.07	0.917626	-0.0373342
	488	Q13509	1.049	0.07	0.918572	-0.0368868
	489	Q9UQ80	1.049	0.07	0.921263	-0.0356162
	490	P20674	1.048	0.07	0.923268	-0.0346722
	491	P12268	1.048	0.07	0.924399	-0.0341405
	492	P46779	1.047	0.07	0.926136	-0.0333251
	493	Q9Y266	1.046	0.07	0.92955	-0.031727
	494	P10301	1.046	0.06	0.93207	-0.0305517
	495	Q09028	1.045	0.06	0.933982	-0.0296616
	496	P62820	1.045	0.06	0.934214	-0.0295537
	497	P80723	1.044	0.06	0.939241	-0.0272227
	498	Q9H0T7	1.044	0.06	0.940567	-0.0266102
	499	P61313	1.043	0.06	0.941683	-0.0260951
	500	P15170	1.043	0.06	0.944693	-0.0247091
	501	P13797	1.042	0.06	0.946989	-0.0236549
	502	P0CG39	1.042	0.06	0.947693	-0.0233321
	503	Q9H4M9	1.041	0.06	0.95007	-0.0222445
	504	P52272	1.04	0.06	0.952634	-0.0210737
	505	Q6ZS86	1.04	0.06	0.95548	-0.0197786
	506	O94804	1.038	0.05	0.960359	-0.0175666
	507	Q9H074	1.038	0.05	0.964059	-0.0158964
	508	P60866	1.037	0.05	0.964116	-0.0158705
	509	P29144	1.037	0.05	0.965162	-0.0153999
	510	P31939	1.037	0.05	0.967456	-0.0143689
	511	P18669	1.036	0.05	0.968885	-0.0137279
	512	Q9ULV4	1.036	0.05	0.97018	-0.0131475
	513	P62241	1.035	0.05	0.972773	-0.0119883
	514	O43681	1.035	0.05	0.97389	-0.0114901
	515	Q86W92	1.035	0.05	0.975543	-0.0107535
	516	Q7Z2W4	1.034	0.05	0.976014	-0.0105442
	517	P21926	1.033	0.05	0.98029	-0.00864546
	518	P41250	1.033	0.05	0.980737	-0.00844761
	519	P27708	1.031	0.04	0.988488	-0.00502861
	520	Q06323	1.031	0.04	0.989759	-0.00447072
	521	P36578	1.031	0.04	0.989818	-0.0044447
	522	P63027	1.031	0.04	0.989837	-0.00443614
	523	P16402	1.031	0.04	0.990074	-0.00433231
	524	P60228	1.031	0.04	0.990436	-0.00417371
	525	P26038	1.03	0.04	0.992223	-0.00339093
	526	P34897	1.029	0.04	0.995525	-0.00194763
	527	P63010	1.029	0.04	0.998199	-0.000782772
	528	P28066	1.028	0.04	1	0
	529	P15153	1.028	0.04	0.999532	-0.000203385
	530	P05106	1.027	0.04	0.996796	-0.00139357
	531	Q86VE9	1.027	0.04	0.995656	-0.00189072
	532	P06241	1.027	0.04	0.995605	-0.0019131
	533	P37235	1.027	0.04	0.995398	-0.00200304
	534	O15067	1.027	0.04	0.994881	-0.00222887
	535	O14828	1.027	0.04	0.994437	-0.00242273
	536	P09619	1.027	0.04	0.994174	-0.00253774
	537	Q15334	1.026	0.04	0.992404	-0.00331133
	538	P43487	1.026	0.04	0.991284	-0.00380194
	539	P60842	1.025	0.04	0.987607	-0.00541573
	540	Q15404	1.025	0.04	0.986868	-0.00574073
	541	P62854	1.025	0.04	0.986127	-0.00606713
	542	P61978	1.024	0.03	0.984025	-0.00699378
	543	P83731	1.024	0.03	0.983824	-0.00708261
	544	P31943	1.024	0.03	0.981524	-0.0080992
	545	P61019	1.024	0.03	0.981472	-0.00812195
	546	Q9H0E2	1.023	0.03	0.980598	-0.00850885
	547	P07108	1.023	0.03	0.979697	-0.00890836
	548	O95336	1.023	0.03	0.978518	-0.00943112
	549	P52294	1.022	0.03	0.97678	-0.0102032
	550	P14209	1.02	0.03	0.968619	-0.013847
	551	Q99829	1.019	0.03	0.962004	-0.016823
	552	P06753	1.018	0.03	0.960705	-0.0174099
	553	P26373	1.018	0.03	0.959371	-0.0180135
	554	P68371	1.017	0.02	0.95737	-0.0189201
	555	Q04446	1.017	0.02	0.957269	-0.018966
	556	P49720	1.017	0.02	0.954523	-0.0202137
	557	P62829	1.017	0.02	0.953974	-0.0204634
	558	O00571	1.017	0.02	0.953821	-0.020533
	559	P32969	1.016	0.02	0.950602	-0.0220012
	560	P49768	1.015	0.02	0.949414	-0.0225446
	561	P05386	1.015	0.02	0.947189	-0.0235633
	562	Q9Y490	1.014	0.02	0.942645	-0.0256517
	563	P23526	1.014	0.02	0.942197	-0.0258584
	564	O75083	1.013	0.02	0.939582	-0.0270655
	565	P62917	1.013	0.02	0.938457	-0.0275855
	566	Q9UP95	1.012	0.02	0.933965	-0.0296695
	567	P99999	1.011	0.02	0.932296	-0.0304464
	568	P61160	1.011	0.02	0.932218	-0.0304824
	569	P35613	1.011	0.02	0.930573	-0.0312495
	570	P11142	1.01	0.01	0.929435	-0.031781
	571	Q15121	1.01	0.01	0.92755	-0.0326626
	572	Q9Y2A7	1.009	0.01	0.925623	-0.0335659
	573	P53680	1.007	0.01	0.916306	-0.0379593
	574	P63211	1.007	0.01	0.915925	-0.0381399
	575	Q12765	1.006	0.01	0.910775	-0.0405888
	576	O75347	1.006	0.01	0.910186	-0.0408698
	577	Q9NQC3	1.006	0.01	0.91002	-0.0409492
	578	Q96BM9	1.005	0.01	0.908909	-0.0414798
	579	P41091	1.004	0.01	0.903224	-0.0442045
	580	O00232	1.004	0.01	0.903122	-0.0442533
